# Supplementary material for: Proteomic Analysis of Lipid Rafts from RBL-2H3 Mast Cells
Source: MDPI journal article supplement (doi:10.3390/ijms20163904), 2019-08-11
Supplement: s1 [file s1]

### Enriched Lipid Rafts

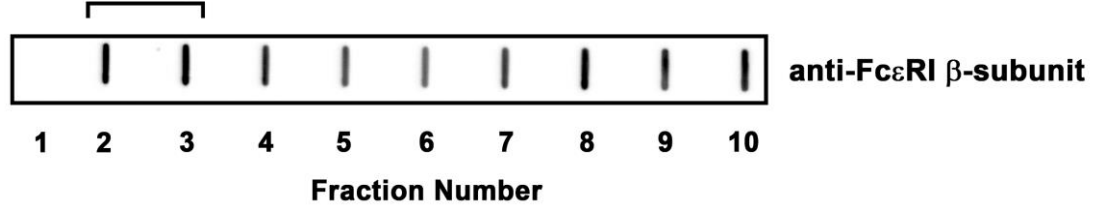

**Figure S2. Immuno-blot analysis of the  $\beta$ -subunit of Fc $\epsilon$ RI from RBL-2H3 MC lipid rafts.** Lysates of RBL-2H3 MCs were fractionated by sucrose density gradient ultracentrifugation, and fractions were immunoblotted using a pool of antibodies against the  $\beta$ -subunit of Fc $\epsilon$ RI. The  $\beta$ -subunit is found in all fractions. Data is representative of 3 independent experiments.
