# Supplementary material for: Proteomic Analysis of Lipid Rafts from RBL-2H3 Mast Cells
Source: MDPI journal article supplement (doi:10.3390/ijms20163904), 2019-08-11
Supplement: s1 [file s1]

**Supplementary Table 4. Mast cell lipid raft proteins absent from RafProtV2 database**

| Method        | Protein ID | Protein accession | Protein description                                       | Gene name    |
|---------------|------------|-------------------|-----------------------------------------------------------|--------------|
| Met II        | AL5AP_RAT  | P20291            | Arachidonate 5-lipoxygenase-activating protein            | Alox5ap      |
| Met I         | ASNS_RAT   | P49088            | Glutamine-dependent asparagine synthetase                 | Asns         |
| Met II        | B1WC50_RAT | B1WC50            | RNA-binding protein EWS-like                              | Ewsr1        |
| Met II        | B4GN1_RAT  | Q10468            | Beta-1,4 N-acetylgalactosaminyltransferase 1              | B4galnt1     |
| Met I         | B5DEN5_RAT | B5DEN5            | Eukaryotic translation elongation factor 1 beta 2         | Eef1b2       |
| Met II        | B5DEZ3_RAT | B5DEZ3            | Coiled-coil domain containing 126                         | Ccdc126      |
| Met II        | B5DFJ2_RAT | B5DFJ2            | Protein FAM3A                                             | Fam3a        |
| Met II        | C1GLC_RAT  | Q499P3            | C1GALT1-specific chaperone 1                              | C1galt1c1    |
| Met II        | CAH8_RAT   | Q5PPN4            | Carbonic anhydrase-related protein                        | Ca8          |
| Met II        | CBPA3_RAT  | P21961            | Mast cell carboxypeptidase A                              | Cpa3         |
| Met II        | CHPT1_RAT  | Q66H21            | Cholinephosphotransferase 1                               | Chpt1        |
| Met II        | CL2DB_RAT  | Q0H8B9            | C-type lectin domain family 2 member D11                  | Clec2d11     |
| Met II        | CMA1_RAT   | P50339            | Chymase 1                                                 | Cma1         |
| Met I         | CNBP_RAT   | P62634            | Cellular nucleic acid-binding protein                     | Cnbp         |
| Met II        | COPD_RAT   | Q66H80            | Coatomer subunit delta                                    | Arcn1        |
| Met II        | D3ZF97_RAT | D3ZF97            | Endoplasmic reticulum lectin 1                            | Erlec1       |
| Met II        | D3ZGV2_RAT | D3ZGV2            | Peroxisomal membrane protein PEX16                        | Pex16        |
| Met II        | D3ZMM8_RAT | D3ZMM8            | Solute carrier family 7 member 6                          | Slc7a6       |
| Met I         | D3ZNQ6_RAT | D3ZNQ6            | NEDD8-conjugating enzyme Ubc12                            | Ube2m        |
| Met II        | D3ZNS8_RAT | D3ZNS8            | Aladin                                                    | Aaas         |
| Met II        | D3ZQG9_RAT | D3ZQG9            | RT1 class I locus CE4                                     | RT1-CE4      |
| Met II        | D3ZSY5_RAT | D3ZSY5            | keratin 84                                                | Krt84        |
| Met II        | D3ZU83_RAT | D3ZU83            | Endoplasmic reticulum-Golgi intermediate compartment 3    | Ergic3       |
| Met II        | D3ZUQ7_RAT | D3ZUQ7            | Pantothenate kinase 3                                     | Pank3        |
| Met II        | D3ZWZ1_RAT | D3ZWZ1            | Integrin alpha X                                          | Itgax        |
| Met II        | D3ZYM4_RAT | D3ZYM4            | Macrophage stimulating 1 receptor                         | Mst1r        |
| Met I         | D4A3S8_RAT | D4A3S8            | NOL1/NOP2/Sun domain family member 2                      | Nsun2        |
| Met II        | D4A533_RAT | D4A533            | Transmembrane anterior posterior transformation protein 1 | Tapt1        |
| Met I         | D4A6A2_RAT | D4A6A2            | Heterogeneous nuclear ribonucleoprotein A3-like           | LOC100911361 |
| Met I         | D4A720_RAT | D4A720            | Serine/arginine-rich splicing factor 7 isoform 2          | Srsf7        |
| Met I         | D4A7U6_RAT | D4A7U6            | U6 snRNA-associated Sm-like protein LSm3                  | Lsm3         |
| Met I; Met II | D4A9X7_RAT | D4A9X7            | Hypermethylated in cancer 2 protein                       | Hic2         |

|               |            |        |                                                                     |          |
|---------------|------------|--------|---------------------------------------------------------------------|----------|
| Met I         | D4ADD7_RAT | D4ADD7 | Glutaredoxin 5                                                      | Glr5     |
| Met I         | DOPD_RAT   | P80254 | D-dopachrome decarboxylase                                          | Ddt      |
| Met II        | E2AK3_RAT  | Q9Z1Z1 | Eukaryotic translation initiation factor 2-alpha kinase 3           | Eif2ak3  |
| Met II        | E9PT10_RAT | Q861Q1 | MHC class I antigen                                                 | RT1-CE4  |
| Met II        | E9PU77_RAT | E9PU77 | Synaptotagmin-like protein 3                                        | Syt13    |
| Met I         | E9PU78_RAT | E9PU78 | Isoform Bcl-X(S) of Bcl-2-like protein 1                            | ---      |
| Met I         | F1LM33_RAT | F1LM33 | Leucine-rich PPR motif-containing protein mitochondrial isoform     | Lrpprc   |
| Met II        | F1LMK0_RAT | F1LMK0 | A-kinase anchoring protein 1 isoform 2                              | Akap1    |
| Met II        | F1LRV9_RAT | F1LRV9 | Myosin heavy chain 1                                                | Myh1     |
| Met II        | F1LT70_RAT | F1LT70 | Pantothenate kinase 2                                               | Pank2    |
| Met II        | F1M8F6_RAT | F1M8F6 | Myosin heavy chain 8                                                | Myh8     |
| Met II        | F1MAS0_RAT | F1MAS0 | keratin 32                                                          | Krt32    |
| Met II        | F6T9E7_RAT | F6T9E7 | P-selectin glycoprotein ligand 1                                    | Selplg   |
| Met II        | F7EP67_RAT | Q6IN10 | Endothelin-converting enzyme 1 Isoform                              | Ece1     |
| Met I         | F7FP91_RAT | Q95II0 | MHC class Ib antigen                                                | RT1-CE5  |
| Met II        | FADS2_RAT  | Q9Z122 | Acyl-CoA 6-desaturase                                               | Fads2    |
| Met I; Met II | FCERB_RAT  | P13386 | High affinity immunoglobulin epsilon receptor subunit beta          | Ms4a2    |
| Met II        | FGOP2_RAT  | Q6TA25 | FGFR1 oncogene partner 2 homolog                                    | Fgfr1op2 |
| Met II        | G3V608_RAT | G3V608 | Interleukin-3 receptor subunit beta                                 | Csf2rb   |
| Met II        | G3V637_RAT | G3V637 | Syntaxin-binding protein 2, isoform                                 | Stxbp2   |
| Met II        | G3V6E1_RAT | G3V6E1 | Myosin heavy chain 2                                                | Myh2     |
| Met I         | G3V6G5_RAT | G3V6G5 | F-box-like/WD repeat-containing protein TBL1X                       | Tbl1x    |
| Met II        | G3V712_RAT | G3V712 | keratin 7                                                           | Krt7     |
| Met II        | G3V7A5_RAT | G3V7A5 | Low density lipoprotein receptor isoform                            | Ldlr     |
| Met II        | G3V7L8_RAT | G3V7L8 | V-type proton ATPase subunit E 1 isoform                            | Atp6v1e1 |
| Met II        | G3V7M2_RAT | G3V7M2 | Integrin beta 7                                                     | Itgb7    |
| Met II        | G3V8I4_RAT | G3V8I4 | Syntaxin-4A                                                         | Stx4     |
| Met I; Met II | G3V908_RAT | G3V908 | keratin, type II Kb15                                               | Kb15     |
| Met I; Met II | G3V936_RAT | G3V936 | Citrate synthase                                                    | Cs       |
| Met I         | G3V993_RAT | G3V993 | SAM domain, SH3 domain and nuclear localization signals, 1 (SAMNS1) | Samsn1   |
| Met I         | HMCS1_RAT  | P17425 | Hydroxymethylglutaryl-CoA synthase cytoplasmic                      | Hmgcs1   |
| Met II        | HRG1_RAT   | B0BNL4 | Heme transporter HRG1                                               | Slc48a1  |
| Met I         | ICK_RAT    | Q62726 | Serine/threonine-protein kinase ICK                                 | Ick      |
| Met II        | IRK2_RAT   | Q64273 | Inward rectifier potassium channel 2                                | Kcnj2    |
| Met II        | ITAD_RAT   | Q9QYE7 | Integrin alpha D                                                    | Itgad    |
| Met I         | M0R866_RAT | M0R866 | Uncharacterized protein                                             | ---      |
| Met II        | M0RCA3_RAT | M0RCA3 | Zinc finger protein-like 1                                          | Zfp11    |

|               |            |        |                                                                      |           |
|---------------|------------|--------|----------------------------------------------------------------------|-----------|
| Met I         | M0RDJ4_RAT | M0RDJ4 | Glia maturation factor beta                                          | Gmfb      |
| Met II        | NCUG1_RAT  | Q68FV6 | Glycosylated lysosomal membrane protein                              | Glmp      |
| Met II        | NDUF5_RAT  | B2GV71 | NADH dehydrogenase [ubiquinone] 1 alpha subcomplex assembly factor 5 | Ndufaf5   |
| Met I         | NQO1_RAT   | P05982 | NAD(P)H dehydrogenase [quinone] 1                                    | Nqo1      |
| Met II        | PCAT2_RAT  | P0C1Q3 | Lysophosphatidylcholine acyltransferase 2                            | Lpcat2    |
| Met II        | PDE3B_RAT  | Q63085 | Cyclic GMP-inhibited phosphodiesterase B                             | Pde3b     |
| Met II        | PHOCN_RAT  | Q9QYW3 | MOB-like protein phocein                                             | Mob4      |
| Met II        | PORED_RAT  | Q5RJM1 | 3-oxo-5-alpha-steroid 4-dehydrogenase 3                              | Srd5a3    |
| Met I         | Q4G002_RAT | Q4G002 | Histocompatibility 2 T region locus 24                               | RT1-T24-4 |
| Met II        | Q5FVC4_RAT | Q5FVC4 | DnaJ (Hsp40) homolog subfamily B member 12                           | Dnajb12   |
| Met II        | Q5RK10_RAT | Q5RK10 | 60S ribosomal protein L13a, isoform                                  | Rpl13a    |
| Met I; Met II | Q63116_RAT | Q63116 | Mast/stem cell growth factor receptor                                | Kit       |
| Met II        | Q63483_RAT | Q63483 | Ras-related protein Rab-38                                           | Rab38     |
| Met II        | Q642E3_RAT | Q642E3 | CDK5 regulatory subunit-associated protein 3, isoform                | Cdk5rap3  |
| Met I         | Q7TP15_RAT | Q7TP15 | S-methyl-5'-thioadenosine phosphorylase                              | Mtap      |
| Met II        | Q7TQ86_RAT | Q7TQ86 | Ac1158                                                               | Rsl1d1    |
| Met I         | R9PXU4_RAT | R9PXU4 | Thioredoxin reductase 1 cytoplasmic                                  | Txnrd1    |
| Met II        | RAB43_RAT  | Q53B90 | Ras-related protein Rab-43                                           | Rab43     |
| Met II        | SIA4C_RAT  | P61131 | Beta-galactoside alpha-2,3-sialyltransferase 4                       | St3gal4   |
| Met II        | SO4A1_RAT  | Q99N01 | Organic anion-transporting polypeptide E                             | Slco4a1   |
| Met II        | STRN3_RAT  | P58405 | Striatin-3                                                           | Strn3     |
| Met II        | TM7S3_RAT  | Q5FVF4 | Transmembrane 7 superfamily member 3                                 | Tm7sf3    |
| Met I; Met II | TRY1_RAT   | P00762 | Anionic trypsin-1                                                    | Prss1     |
| Met II        | VEZA_RAT   | Q5XI52 | Vezatin                                                              | Vezt      |
| Met II        | VGFR2_RAT  | O08775 | Vascular endothelial growth factor receptor 2                        | Kdr       |

| Header line description of worksheet "RafProtV2 Analysis" |                                                                   |
|-----------------------------------------------------------|-------------------------------------------------------------------|
| Method                                                    | Protein identification by which Method                            |
| Protein ID                                                | Protein identification of UniProt                                 |
| Protein accession                                         | Protein accession number of UniProt                               |
| Protein description                                       | Protein functional description                                    |
| Gene name                                                 | Indicates the name of the gene that code for the protein sequence |
