# Supplementary material for: Proteomic Analysis of Lipid Rafts from RBL-2H3 Mast Cells
Source: MDPI journal article supplement (doi:10.3390/ijms20163904), 2019-08-11
Supplement: s1 [file s1]

Supplementary Table 6. Enriched GO terms from mast cell lipid raft proteome analysis using DAVID Bioinformatic Resources

Annotation Cluster Enrichment Score: 150.54

| ID Term            | GO Term               | Fold Enriched | Count                                                | p-value   | FDR       |
|--------------------|-----------------------|---------------|------------------------------------------------------|-----------|-----------|
| GO:1903561         | EXTRACELLULAR VESICLE | 3.60          | 487                                                  | 6.97E-169 | 1.08E-165 |
| Annotated proteins |                       |               |                                                      |           |           |
| Protein Accession  |                       |               | Protein Identification                               |           |           |
| D3ZAF6             |                       |               | ATP synthase subunit F mitochondrial                 |           |           |
| Q6P503             |                       |               | V-type proton ATPase subunit D                       |           |           |
| B5DEH2             |                       |               | Erlin-2                                              |           |           |
| F1M2P8             |                       |               | Protein kinase C alpha                               |           |           |
| P50408             |                       |               | V-type proton ATPase subunit F                       |           |           |
| Q63716             |                       |               | Peroxisomal oxidoreductase                           |           |           |
| P26772             |                       |               | 10 kDa heat shock protein mitochondrial              |           |           |
| Q5U204             |                       |               | Regulator complex protein LAMTOR3                    |           |           |
| P0DP29             |                       |               | Calmodulin-1                                         |           |           |
| G3V852             |                       |               | Talin-1                                              |           |           |
| D3ZTX0             |                       |               | Transmembrane emp24 domain-containing protein 7      |           |           |
| P50503             |                       |               | Hsc70-interacting protein                            |           |           |
| P06686             |                       |               | Sodium/potassium-transporting ATPase subunit alpha-2 |           |           |
| P06687             |                       |               | Sodium/potassium-transporting ATPase subunit alpha-3 |           |           |
| O08623             |                       |               | Sequestosome-1                                       |           |           |
| P06685             |                       |               | Sodium/potassium-transporting ATPase subunit alpha-1 |           |           |
| P07632             |                       |               | Superoxide dismutase [Cu-Zn]                         |           |           |
| Q66H18             |                       |               | Synaptophysin-like 1                                 |           |           |
| G3V6H0             |                       |               | Ras-related protein Rab-1b                           |           |           |
| P27139             |                       |               | Carbonic anhydrase 2                                 |           |           |
| Q7TP15             |                       |               | S-methyl-5'-thioadenosine phosphorylase              |           |           |
| Q9ES40             |                       |               | PRA1 family protein 3                                |           |           |
| P61589             |                       |               | Transforming protein RhoA                            |           |           |
| G3V7U6             |                       |               | Calpain 5                                            |           |           |
| P68511             |                       |               | 14-3-3 protein eta                                   |           |           |
| Q01205             |                       |               | 2-oxoglutarate dehydrogenase complex component E2    |           |           |
| P67779             |                       |               | Prohibitin                                           |           |           |
| Q5FVF4             |                       |               | Transmembrane 7 superfamily member 3                 |           |           |
| Q5BJY9             |                       |               | Keratin, type I cytoskeletal 18                      |           |           |
| F1M5Z5             |                       |               | Anoctamin-6                                          |           |           |

|        |                                                                                   |
|--------|-----------------------------------------------------------------------------------|
| D3ZRN3 | Beta-actin-like protein 2                                                         |
| O08651 | D-3-phosphoglycerate dehydrogenase                                                |
| O88989 | Malate dehydrogenase cytoplasmic                                                  |
| P11762 | Galectin-1                                                                        |
| P27615 | Lysosome membrane protein 2 (CD36)                                                |
| Q6AYK6 | Calcyclin-binding protein                                                         |
| P06761 | Endoplasmic reticulum chaperone BiP                                               |
| Q9QYV0 | Disintegrin and metalloproteinase domain-containing protein 15                    |
| P63102 | 14-3-3 protein zeta/delta                                                         |
| B0K020 | CDGSH iron-sulfur domain-containing protein 1                                     |
| Q9EST6 | Acidic leucine-rich nuclear phosphoprotein 32 family member B                     |
| Q78P65 | Rap2A-like protein                                                                |
| P07943 | Aldose reductase                                                                  |
| P32089 | Citrate transport protein                                                         |
| M0RCF3 | Integrin beta 3                                                                   |
| Q5XI34 | Serine/threonine-protein phosphatase 2A 65 kDa regulatory subunit A alpha isoform |
| Q5XI32 | F-actin-capping protein subunit beta                                              |
| P83732 | 60S ribosomal protein L24                                                         |
| Q5XIV1 | Phosphoglycerate kinase 2                                                         |
| P52555 | Endoplasmic reticulum resident protein 29                                         |
| O88994 | Mitochondrial amidoxime reducing component 2                                      |
| Q5XI38 | Lymphocyte cytosolic protein 1                                                    |
| P04764 | Alpha-enolase                                                                     |
| Q5XI36 | CD97                                                                              |
| B0K010 | Thioredoxin domain-containing 17                                                  |
| Q10758 | Keratin, type II cytoskeletal 8                                                   |
| Q07936 | Annexin A2                                                                        |
| P05197 | Elongation factor 2                                                               |
| Q9R120 | Voltage-dependent anion-selective channel protein 3                               |
| P85968 | 6-phosphogluconate dehydrogenase decarboxylating                                  |
| P63322 | Ras-related protein Ral-A                                                         |
| Q63396 | Activated RNA polymerase II transcriptional coactivator p15                       |
| P54313 | Transducin beta-2                                                                 |
| Q6AYQ9 | Peptidyl-prolyl cis-trans isomerase C                                             |
| F1MA89 | Cyclin Y                                                                          |
| P54311 | Transducin beta-1                                                                 |
| Q6PDU1 | Serine/arginine-rich splicing factor 2                                            |
| Q6AYQ4 | Transmembrane protein 109                                                         |
| O70257 | Syntaxin-7                                                                        |

|        |                                                                         |
|--------|-------------------------------------------------------------------------|
| O88767 | Protein/nucleic acid deglycase DJ-1                                     |
| D4AEP0 | Adenylosuccinate synthetase isozyme 2                                   |
| P51577 | P2X purinoceptor 4                                                      |
| D3ZUX5 | MICOS complex subunit MIC-19                                            |
| P35213 | 14-3-3 protein beta/alpha                                               |
| P34058 | Heat shock protein HSP 90-beta                                          |
| Q9EQX9 | Ubiquitin-conjugating enzyme E2 N                                       |
| G3V7P1 | Syntaxin-12                                                             |
| P15865 | Histone H1.4                                                            |
| Q91ZN1 | Coronin-1A                                                              |
| P04785 | Protein disulfide-isomerase                                             |
| G3V9Y2 | Phospholipid phosphatase 1                                              |
| G3V7Q7 | Ras GTPase-activating-like protein IQGAP1                               |
| Q63016 | Large neutral amino acids transporter small subunit 1                   |
| Q5EAP4 | Guanine nucleotide binding protein alpha-14                             |
| R9PXR4 | Mitochondrial import receptor subunit TOM70                             |
| P63331 | Serine/threonine-protein phosphatase 2A catalytic subunit alpha isoform |
| P85971 | 6-phosphogluconolactonase                                               |
| D3ZSY5 | keratin 84                                                              |
| Q64244 | ADP-ribosyl cyclase/cyclic ADP-ribose hydrolase 1                       |
| P21531 | 60S ribosomal protein L3                                                |
| P81155 | Voltage-dependent anion-selective channel protein 2                     |
| P31000 | Vimentin                                                                |
| P12368 | cAMP-dependent protein kinase type II-alpha regulatory subunit          |
| F7EPH4 | Inorganic Pyrophosphatase                                               |
| Q5I0E7 | Transmembrane emp24 domain-containing protein 9                         |
| A1L1J8 | Ras-related protein Rab-5b                                              |
| P38983 | 40S ribosomal protein SA                                                |
| B0K031 | 60S ribosomal protein L7, isoform                                       |
| F1LN88 | Aldehyde dehydrogenase                                                  |
| F7FFV2 | keratin 5                                                               |
| Q05982 | Nucleoside diphosphate kinase A                                         |
| P21708 | Mitogen-activated protein kinase 3                                      |
| P04797 | Glyceraldehyde-3-phosphate dehydrogenase                                |
| O35567 | Bifunctional purine biosynthesis protein PURH                           |
| P04897 | Guanine nucleotide-binding protein G(i) subunit alpha-2                 |
| Q8VHF5 | Citrate synthase mitochondrial                                          |
| G3V936 | Citrate synthase                                                        |
| Q08849 | Syntaxin-3                                                              |

|        |                                                                        |
|--------|------------------------------------------------------------------------|
| Q8CFN2 | Cell division control protein 42 homolog (CDC42)                       |
| Q9EPV5 | Apoptotic protease-activating factor 1                                 |
| Q5I0D1 | Glyoxalase domain-containing protein 4                                 |
| Q53B90 | Ras-related protein Rab-43                                             |
| P58195 | Phospholipid scramblase 1                                              |
| Q9JHW5 | VAMP7                                                                  |
| Q9JI85 | Nucleobindin-2                                                         |
| P01830 | Thy-1 membrane glycoprotein                                            |
| O70377 | Synaptosomal-associated protein 23 (SNAP-23)                           |
| Q68FP1 | Gelsolin                                                               |
| D4A133 | V-type proton ATPase catalytic subunit A                               |
| P21913 | Succinate dehydrogenase [ubiquinone] iron-sulfur subunit mitochondrial |
| Q07014 | Tyrosine-protein kinase Lyn                                            |
| D3ZK56 | Ras-related protein Rap-2c                                             |
| Q07984 | Translocon-associated protein subunit delta                            |
| Q5XI77 | Annexin A11                                                            |
| P31977 | Ezrin                                                                  |
| Q5XI73 | Rho GDP dissociation inhibitor 1                                       |
| P07151 | Beta-2-microglobulin                                                   |
| P15999 | ATP synthase subunit alpha mitochondrial                               |
| P07150 | Annexin A1                                                             |
| Q6AYQ1 | Golgin subfamily A member 7                                            |
| P60711 | Actin cytoplasmic 1                                                    |
| O35353 | Transducin beta-4                                                      |
| B2RYB8 | Integrin beta 2                                                        |
| F1LW77 | Ras-related protein Rab-33b                                            |
| Q9Z2S9 | Flotillin-2                                                            |
| Q5U362 | Annexin A4                                                             |
| Q68FR6 | Elongation factor 1-gamma                                              |
| Q9Z2L0 | Voltage-dependent anion-selective channel protein 1                    |
| B2RYC9 | Glucosylceramidase                                                     |
| P51635 | Alcohol dehydrogenase [NADP(+)]                                        |
| E9PTU4 | Myosin heavy chain 11                                                  |
| F1LM82 | Heterogeneous nuclear ribonucleoproteins A2/B1                         |
| P11442 | Clathrin heavy chain 1                                                 |
| B0BN81 | Ribosomal protein S5                                                   |
| P12075 | Cytochrome c oxidase subunit 5B mitochondrial                          |
| Q05030 | Platelet-derived growth factor receptor beta                           |
| G3V7L8 | V-type proton ATPase subunit E 1 isoform                               |

|        |                                                      |
|--------|------------------------------------------------------|
| Q62662 | Tyrosine-protein kinase FRK                          |
| P61107 | Ras-related protein Rab-14                           |
| F1LPV0 | Asparagine--tRNA ligase, cytoplasmic                 |
| P61972 | Nuclear transport factor 2                           |
| Q6PCU2 | V-type proton ATPase subunit E 1                     |
| Q5PQL7 | Integral membrane protein 2C                         |
| M0R9L0 | Nascent polypeptide-associated complex subunit alpha |
| P49134 | Integrin beta 1                                      |
| P50475 | Alanine--tRNA ligase cytoplasmic                     |
| G3V712 | keratin 7                                            |
| Q68FQ0 | T-complex protein 1 epsilon                          |
| Q810F4 | Protein FAM3C                                        |
| P31044 | Phosphatidylethanolamine-binding protein 1           |
| Q4QQV0 | Tubulin beta-6                                       |
| F1LQ81 | Vesicle-fusing ATPase                                |
| Q3B7V5 | Ras-related protein Rab-2b                           |
| D4A0T0 | NADH dehydrogenase 1 beta subcomplex subunit 10      |
| G3V7M2 | Integrin beta 7                                      |
| G3V6P8 | Guanine nucleotide-binding protein gamma-12          |
| G3V6P7 | Myosin heavy chain 9                                 |
| Q04970 | GTPase NRas                                          |
| D3ZNG3 | Signal peptide peptidase-like 2A                     |
| Q9Z1J7 | Amino acid transporter                               |
| E9PTW1 | Secretory carrier-associated membrane protein        |
| R9PXU4 | Thioredoxin reductase 1 cytoplasmic                  |
| D4ADE8 | ATP-dependent RNA helicase DDX3X                     |
| O88600 | Heat shock 70 kDa protein 4                          |
| G3V9N9 | alpha-1,2-Mannosidase                                |
| Q794F9 | 4F2 cell-surface antigen heavy chain                 |
| Q6P791 | Ragulator complex protein LAMTOR1                    |
| F1LNT8 | VAMP8                                                |
| P61227 | Ras-related protein Rap-2b                           |
| Q6P799 | Serine--tRNA ligase cytoplasmic                      |
| P62703 | 40S ribosomal protein S4, X isoform                  |
| P62909 | 40S ribosomal protein S3                             |
| Q6AYC4 | Macrophage-capping protein                           |
| Q63377 | Sodium/potassium-transporting ATPase subunit beta-3  |
| P62907 | 60S ribosomal protein L10a                           |
| M0RBJ0 | Guanine nucleotide-binding protein gamma-2           |

|        |                                                                            |
|--------|----------------------------------------------------------------------------|
| Q63942 | Ras-related protein Rab-3d                                                 |
| P48721 | Mortalin                                                                   |
| Q63584 | Transmembrane emp24 domain-containing protein 10                           |
| P10960 | Prosaposin                                                                 |
| Q6EV76 | Alpha-(1,6)-fucosyltransferase                                             |
| Q5XIM9 | T-complex protein 1 beta                                                   |
| F1M779 | Clathrin heavy chain                                                       |
| P05065 | Fructose-bisphosphate aldolase A                                           |
| P32551 | Cytochrome b-c1 complex subunit 2 mitochondrial                            |
| B0BN52 | Mitochondrial carrier homolog 2                                            |
| E9PTX9 | Solute carrier family 12 member 2                                          |
| Q5XFX0 | Transgelin-2                                                               |
| Q7TSA0 | Mitochondrial Rho GTPase 2                                                 |
| P61805 | Dolichyl-diphosphooligosaccharide protein glycosyltransferase subunit DAD1 |
| G3V908 | keratin, type II Kb15                                                      |
| P09811 | Glycogen phosphorylase liver form                                          |
| P53987 | Monocarboxylate transporter 1                                              |
| G3V6N2 | Transmembrane emp24 domain-containing protein 4                            |
| Q62902 | Lectin mannose-binding 1                                                   |
| P28494 | Alpha-mannosidase 2                                                        |
| P61131 | Beta-galactoside alpha-2,3-sialyltransferase 4                             |
| Q6PDV6 | 40S ribosomal protein S14                                                  |
| P50399 | Rab GDP dissociation inhibitor beta                                        |
| Q6AYD3 | Proliferation-associated protein 2G4                                       |
| Q9WVB1 | Ras-related protein Rab-6a                                                 |
| Q05175 | Brain acid soluble protein 1                                               |
| B2RYG6 | Ubiquitin thioesterase OTUB1                                               |
| P62278 | 40S ribosomal protein S13                                                  |
| Q3T1K5 | F-actin-capping protein subunit alpha-2                                    |
| P62138 | Serine/threonine-protein phosphatase PP1-alpha catalytic subunit           |
| P68370 | Tubulin alpha-1A                                                           |
| Q5U316 | Ras-related protein Rab-35                                                 |
| P11167 | Solute carrier family 2, facilitated glucose transporter member 1          |
| P31399 | ATP synthase subunit D mitochondrial                                       |
| D4A720 | Serine/arginine-rich splicing factor 7 isoform 2                           |
| G3V8L7 | Integrin alpha M                                                           |
| P04642 | L-lactate dehydrogenase A chain                                            |
| O35509 | Ras-related protein Rab-11b                                                |
| P62828 | GTP-binding nuclear protein Ran                                            |

|        |                                                        |
|--------|--------------------------------------------------------|
| P70583 | Deoxyuridine 5'-triphosphate nucleotidohydrolase       |
| Q6AYI1 | Probable ATP-dependent RNA helicase DDX5               |
| P70580 | Membrane-associated progesterone receptor component 1  |
| P23358 | 60S ribosomal protein L12                              |
| Q3T1J1 | Eukaryotic translation initiation factor 5A-1          |
| F7EWC1 | Vasodilator-stimulated phosphoprotein                  |
| Q66HA6 | ADP-ribosylation factor-like protein 8B                |
| P11598 | Protein disulfide-isomerase A3                         |
| P62282 | 40S ribosomal protein S11                              |
| Q6P3V9 | 60S ribosomal protein L4                               |
| G3V6T1 | Coatmer subunit alpha                                  |
| Q6P3V8 | Eukaryotic initiation factor 4A-I                      |
| Q66HA4 | Tax1-binding protein 1 homolog                         |
| F1LP82 | Ras-related protein Rab-2a                             |
| Q62636 | Ras-related protein Rap-1b                             |
| Q3MIE4 | Synaptic vesicle membrane protein VAT-1 homolog        |
| Q6P742 | Proteolipid protein 2                                  |
| P04636 | Malate dehydrogenase mitochondrial                     |
| P62914 | 60S ribosomal protein L11                              |
| Q5U300 | Ubiquitin-like modifier-activating enzyme 1            |
| G3V7I0 | Peroxiredoxin-3                                        |
| P62815 | V-type proton ATPase subunit B                         |
| Q9JID2 | Guanine nucleotide-binding protein alpha-11            |
| Q63198 | Contactin 1                                            |
| P11980 | Pyruvate kinase PKM                                    |
| Q9Z2J5 | VAMP5                                                  |
| P10719 | ATP synthase subunit beta mitochondrial                |
| D3ZAY7 | Band 4.1-like protein 2                                |
| G3V741 | Solute carrier family 25 member 3                      |
| O88941 | Mannosyl-oligosaccharide glucosidase                   |
| O54980 | Synaptogyrin-2                                         |
| Q6P6T6 | Cathepsin D                                            |
| Q4V7D9 | Acid sphingomyelinase-like phosphodiesterase 3B        |
| Q6S395 | Plectin                                                |
| F1LMP7 | Granulins                                              |
| Q5XI04 | Erythrocyte band 7 integral membrane protein           |
| F1LQJ7 | Phosphoenolpyruvate carboxykinase [GTP], mitochondrial |
| Q9R1T1 | Barrier-to-autointegration factor                      |
| P22734 | Catechol O-methyltransferase                           |

|        |                                                                     |
|--------|---------------------------------------------------------------------|
| P62804 | Histone H4                                                          |
| F1LM93 | Tyrosine-protein kinase Yes                                         |
| Q63083 | Nucleobindin-1                                                      |
| Q9JKB7 | Guanine deaminase                                                   |
| P12928 | Pyruvate kinase PKLR                                                |
| Q63081 | Protein disulfide-isomerase A6                                      |
| G3V9S3 | Tyrosine-protein phosphatase non-receptor type 13                   |
| P13832 | Myosin regulatory light chain RLC-A                                 |
| B1WBY5 | DnaJ homolog subfamily C member 11                                  |
| Q62940 | E3 ubiquitin-protein ligase NEDD4                                   |
| Q62658 | Peptidyl-prolyl cis-trans isomerase FKBP1A                          |
| P68255 | 14-3-3 protein theta                                                |
| Q63803 | Guanine nucleotide-binding protein G(s) subunit alpha isoforms XLas |
| Q6P6U0 | Tyrosine-protein kinase Fgr                                         |
| Q62753 | Syntaxin-binding protein 2                                          |
| D4A5K6 | Zinc metalloproteinase STE24                                        |
| P13838 | Leukosialin                                                         |
| Q06647 | ATP synthase subunit O mitochondrial                                |
| G3V637 | Syntaxin-binding protein 2, isoform                                 |
| P62859 | 40S ribosomal protein S28                                           |
| Q6IN24 | Galectin-8                                                          |
| G3V8I4 | Syntaxin-4A                                                         |
| Q6IFV6 | Keratin 35                                                          |
| P09895 | 60S ribosomal protein L5                                            |
| Q63507 | 60S ribosomal protein L14                                           |
| P10111 | Peptidyl-prolyl cis-trans isomerase A                               |
| G3V679 | Transferrin receptor protein 1                                      |
| P62260 | 14-3-3 protein epsilon                                              |
| Q5XIE8 | Integral membrane protein 2B                                        |
| B2GUZ9 | Fam49b protein                                                      |
| Q6IG03 | Keratin, type II cytoskeletal 73                                    |
| Q6IG02 | Keratin, type II cytoskeletal 2 epidermal                           |
| Q6IG01 | Keratin, type II cytoskeletal 1B                                    |
| Q9Z0V6 | Thioredoxin-dependent peroxide reductase mitochondrial              |
| Q3SWT0 | Platelet endothelial cell adhesion molecule (Pecam1)                |
| Q6IN10 | Endothelin-converting enzyme 1 Isoform                              |
| Q6IG05 | Keratin, type II cytoskeletal 75                                    |
| Q6IFW6 | Keratin, type I cytoskeletal 10                                     |
| P09495 | Tropomyosin alpha-4                                                 |



|        |                                                       |
|--------|-------------------------------------------------------|
| Q5XIF6 | Tubulin alpha-4A                                      |
| D3ZWS0 | Protein scribble homolog                              |
| P62963 | Profilin-1                                            |
| Q66HD0 | Endoplasmin                                           |
| P62250 | 40S ribosomal protein S16                             |
| Q91Y81 | Septin-2                                              |
| Q99P74 | Ras-related protein Rab-27b                           |
| P70550 | Ras-related protein Rab-8b                            |
| Q99P75 | Ras-related protein Rab-9a                            |
| Q6IG12 | Keratin, type II cytoskeletal 7                       |
| P35704 | Peroxiredoxin-2                                       |
| Q2I6B2 | V-type proton ATPase subunit A1                       |
| G3V8G5 | Golgi apparatus protein 1                             |
| P62630 | Elongation factor 1-alpha 1                           |
| P62775 | Myotrophin                                            |
| Q6P6Q2 | Keratin, type II cytoskeletal 5                       |
| P62246 | 40S ribosomal protein S15a                            |
| D3ZNQ6 | NEDD8-conjugating enzyme Ubc12                        |
| P62832 | 60S ribosomal protein L23                             |
| P05712 | Ras-related protein Rab-2a                            |
| P62836 | Ras-related protein Rap-1a                            |
| P62243 | 40S ribosomal protein S8                              |
| E9PSV5 | Phosphoserine aminotransferase                        |
| Q9JLT0 | Myosin heavy chain 10                                 |
| P82995 | Heat shock protein HSP 90-alpha                       |
| P42667 | SEC11 homolog A                                       |
| G3V8F5 | Mitochondrial import receptor subunit TOM40 homolog   |
| Q6IN37 | GM2 ganglioside activator                             |
| P80254 | D-dopachrome decarboxylase                            |
| P13383 | Nucleolin                                             |
| Q63610 | Tropomyosin alpha-3                                   |
| Q66X93 | Staphylococcal nuclease domain-containing protein 1   |
| Q6IFZ5 | Keratin, type II cytoskeletal 2 oral                  |
| Q5VLR5 | Endoplasmic reticulum resident protein 44             |
| P62986 | Ubiquitin-60S ribosomal protein L40                   |
| Q6RUV5 | Ras-related C3 botulinum toxin substrate 1 (Rac1)     |
| P62982 | Ubiquitin-40S ribosomal protein S27a                  |
| P82471 | Guanine nucleotide-binding protein G(q) subunit alpha |
| B4F7C2 | Tubulin beta-4A                                       |

|        |                                                        |
|--------|--------------------------------------------------------|
| E9PT65 | Radixin                                                |
| Q9EPH8 | Polyadenylate-binding protein 1                        |
| Q6MG61 | Chloride intracellular channel protein 1               |
| P19944 | 60S acidic ribosomal protein P1                        |
| Q6TXF3 | Acyl-CoA-binding protein                               |
| P19945 | 60S acidic ribosomal protein P0                        |
| B2RZ27 | SH3 domain-binding glutamic acid-rich-like protein 3   |
| B2RYQ2 | Serine/threonine-protein phosphatase 2A activator      |
| P11240 | Cytochrome c oxidase subunit 5A mitochondrial          |
| P11232 | Thioredoxin                                            |
| P05982 | NAD(P)H dehydrogenase [quinone] 1                      |
| P10252 | CD48 antigen                                           |
| P69897 | Tubulin beta-5                                         |
| P62890 | 60S ribosomal protein L30                              |
| P63095 | Guanine nucleotide-binding protein G(s) subunit alpha  |
| P52296 | Importin subunit beta-1                                |
| D3ZTJ0 | Protein XRP2                                           |
| Q4QRB4 | Tubulin beta-3                                         |
| Q6P9V9 | Tubulin alpha-1B                                       |
| B2GUV5 | V-type proton ATPase subunit G 1                       |
| P18418 | Calreticulin                                           |
| Q6P9V1 | CD81 molecule                                          |
| P13221 | Aspartate aminotransferase cytoplasmic                 |
| Q09073 | ADP/ATP translocase 2                                  |
| Q6AYA5 | Transmembrane protein 106 B                            |
| P54921 | Alpha-soluble NSF attachment protein (SNAP-alpha)      |
| P25113 | Phosphoglycerate mutase 1                              |
| Q3KRD8 | Eukaryotic translation initiation factor 6             |
| G3V8C4 | Chloride intracellular channel protein 4               |
| P61983 | 14-3-3 protein gamma                                   |
| P49242 | 40S ribosomal protein S3a                              |
| B0BNA5 | Coactosin-like protein                                 |
| P02401 | 60S acidic ribosomal protein P2                        |
| P50137 | Transketolase                                          |
| P09527 | Ras-related protein Rab-7a                             |
| P10888 | Cytochrome c oxidase subunit 4 isoform 1 mitochondrial |
| Q66HG5 | Transmembrane 9 superfamily member 2                   |
| Q5U3Z7 | Serine hydroxymethyltransferase                        |
| P48500 | Triosephosphate isomerase                              |

|        |                                                                         |
|--------|-------------------------------------------------------------------------|
| P23640 | Ras-related protein Rab-27a                                             |
| P62747 | Rho-related GTP-binding protein RhoB                                    |
| O70595 | ATP-binding cassette sub-family B member 6                              |
| B2GV92 | Prostaglandin E synthase 3                                              |
| P62083 | 40S ribosomal protein S7                                                |
| Q6IFU9 | keratin 16                                                              |
| Q6P9T8 | Tubulin beta-4B                                                         |
| Q6IFU8 | Keratin, type I cytoskeletal 17                                         |
| P04157 | Receptor-type tyrosine-protein phosphatase C (CD45)                     |
| Q6IFV3 | Keratin, type I cytoskeletal 15                                         |
| Q6IFV1 | Keratin, type I cytoskeletal 14                                         |
| P20070 | NADH-cytochrome b5 reductase 3                                          |
| Q5XIH7 | Prohibitin 2                                                            |
| G3V8A5 | Vacuolar protein sorting-associated protein 35                          |
| P11348 | Dihydropteridine reductase                                              |
| D4A465 | Ragulator complex protein LAMTOR2                                       |
| Q5I0G4 | Glycine--tRNA ligase                                                    |
| Q5U1Y2 | Ras-related C3 botulinum toxin substrate 2 (Rac2)                       |
| P85007 | Immediate early response 3-interacting protein 1                        |
| Q00238 | Intercellular adhesion molecule 1 (ICAM1)                               |
| Q5M843 | 2-oxoglutarate and iron-dependent oxygenase domain-containing protein 3 |
| Q5EB77 | Ras-related protein Rab-18                                              |
| Q6AY18 | GTP-binding protein SAR1a                                               |
| D3ZIP8 | Endonuclease domain containing 1                                        |
| P19804 | Nucleoside diphosphate kinase B                                         |
| D4ADS9 | EFR3 homolog A                                                          |
| B2GVB9 | Fermt3 protein                                                          |
| B0BNG3 | Vesicular integral-membrane protein VIP36                               |
| Q6AXT5 | Ras-related protein Rab-21                                              |
| Q6NYB7 | Ras-related protein Rab-1a                                              |
| D3ZPR0 | Exportin-2                                                              |
| P19511 | ATP synthase F(0) complex subunit B1 mitochondrial                      |
| G3V8Z1 | Linker for activation of T-cells family member 2 (NTAL)                 |
| Q76GL9 | Neutral amino acid transporter A                                        |
| F1LNF0 | Myosin heavy chain 14                                                   |
| P17074 | 40S ribosomal protein S19                                               |
| Q5M7T6 | V-type proton ATPase subunit D 1                                        |
| P63245 | Receptor of activated protein C kinase 1 (RACK1)                        |
| Q8SEZ5 | Cytochrome c oxidase subunit 2                                          |

|        |                                                                  |
|--------|------------------------------------------------------------------|
| Q4KM73 | UMP-CMP kinase                                                   |
| A1L134 | Ancient ubiquitous protein 1                                     |
| P46462 | Transitional endoplasmic reticulum ATPase                        |
| P35171 | Cytochrome c oxidase subunit 7A2                                 |
| P04961 | Proliferating cell nuclear antigen                               |
| Q32PX6 | Rho-related GTP-binding protein RhoG                             |
| Q3KRC3 | Signal recognition particle receptor alpha                       |
| Q6AXS5 | Plasminogen activator inhibitor 1 RNA-binding protein            |
| Q6AXS4 | Renin receptor                                                   |
| P05426 | 60S ribosomal protein L7                                         |
| D4A4T0 | STIP1 homology and U box-containing protein 1                    |
| D4A0E2 | NSF attachment protein gamma                                     |
| P16617 | Phosphoglycerate kinase 1                                        |
| P45592 | Cofilin-1                                                        |
| Q01621 | Tyrosine-protein kinase LCK                                      |
| F1LZX9 | Integrin alpha 5                                                 |
| F1MAS0 | keratin 32                                                       |
| Q9JJ19 | Na(+)/H(+) exchange regulatory cofactor NHE-RF1                  |
| P08753 | Guanine nucleotide-binding protein G(k) subunit alpha            |
| D3ZPP2 | ADP-ribosylation factor-like protein 8A                          |
| P63269 | Actin gamma-enteric smooth muscle                                |
| P15429 | Beta-enolase                                                     |
| Q63692 | Hsp90 co-chaperone Cdc37                                         |
| P97675 | Ectonucleotide pyrophosphatase/phosphodiesterase family member 3 |
| Q5XIA8 | Growth hormone-inducible transmembrane protein                   |
| Q5M7W6 | Protein FAM234A                                                  |
| D4A9L2 | Serine/arginine-rich splicing factor 1                           |
| P35289 | Ras-related protein Rab-15                                       |
| D3ZZR9 | Peptidylprolyl isomerase                                         |
| P63018 | Heat shock cognate 71 kDa protein                                |
| P63012 | Ras-related protein Rab-3a                                       |
| P35565 | Calnexin                                                         |
| Q9R0C5 | Polypeptide N-acetylgalactosaminyltransferase 7                  |
| B0BNK1 | Ras-related protein Rab-5c                                       |
| P17046 | Lysosome-associated membrane glycoprotein 2 (Lamp2)              |
| G3V6D3 | ATP synthase subunit beta                                        |
| D3ZDR2 | Charged multivesicular body protein 6                            |
| E9PTI1 | V-type proton ATPase subunit H                                   |
| P85108 | Tubulin beta-2A                                                  |

|        |                                                       |
|--------|-------------------------------------------------------|
| D3ZS8  | V-type proton ATPase subunit B, kidney isoform        |
| P35435 | ATP synthase subunit gamma mitochondrial              |
| D3ZGM7 | Peptidase inhibitor 16                                |
| Q08163 | Adenylyl cyclase-associated protein 1                 |
| P26453 | Basigin                                               |
| Q5RKJ9 | Ras-related protein Rab-10                            |
| Q5M860 | Rho GDP dissociation inhibitor 2                      |
| Q8CGU6 | Nicastrin                                             |
| P63039 | 60 kDa heat shock protein                             |
| P14659 | Heat shock-related 70 kDa protein 2                   |
| Q6IRF8 | V-type proton ATPase subunit S1                       |
| P00507 | Aspartate aminotransferase mitochondrial              |
| Q3MHS9 | Chaperonin-containing TCP1 subunit 6A                 |
| M0RC99 | Ras-related protein Rab-5a                            |
| Q9JK11 | Reticulon-4                                           |
| P14562 | Lysosome-associated membrane glycoprotein 1 (Lamp1)   |
| Q6AXV4 | Sorting and assembly machinery component 50 homolog   |
| P14668 | Annexin A5                                            |
| P49432 | Pyruvate dehydrogenase component E1 beta              |
| Q4G075 | Leukocyte elastase inhibitor                          |
| Q9Z1E1 | Flotillin-1                                           |
| Q6IMF3 | Keratin, type II cytoskeletal 1                       |
| Q920J4 | Thioredoxin-like protein 1                            |
| P24368 | Peptidyl-prolyl cis-trans isomerase B                 |
| Q499P3 | C1GALT1-specific chaperone 1                          |
| B0BNJ1 | Sorcin                                                |
| P19627 | Guanine nucleotide-binding protein G(z) subunit alpha |
| G3V9A3 | 14-3-3 protein sigma                                  |
| P35280 | Ras-related protein Rab-8a                            |

| ID Term            | GO Term               | Fold Enriched | Count                                | <i>p</i> -value | FDR      |
|--------------------|-----------------------|---------------|--------------------------------------|-----------------|----------|
| GO:0070062         | EXTRACELLULAR EXOSOME | 3.60          | 485                                  | 2.38E-167       | 3.69E-64 |
| Annotated proteins |                       |               |                                      |                 |          |
| Protein Accession  |                       |               | Protein Identification               |                 |          |
| D3ZAF6             |                       |               | ATP synthase subunit F mitochondrial |                 |          |
| Q6P503             |                       |               | V-type proton ATPase subunit D       |                 |          |
| B5DEH2             |                       |               | Erln-2                               |                 |          |

|        |                                                                |
|--------|----------------------------------------------------------------|
| F1M2P8 | Protein kinase C alpha                                         |
| P50408 | V-type proton ATPase subunit F                                 |
| Q63716 | Peroxiredoxin-1                                                |
| P26772 | 10 kDa heat shock protein mitochondrial                        |
| Q5U204 | Ragulator complex protein LAMTOR3                              |
| P0DP29 | Calmodulin-1                                                   |
| G3V852 | Talin-1                                                        |
| D3ZTX0 | Transmembrane emp24 domain-containing protein 7                |
| P50503 | Hsc70-interacting protein                                      |
| O08623 | Sequestosome-1                                                 |
| P06685 | Sodium/potassium-transporting ATPase subunit alpha-1           |
| P07632 | Superoxide dismutase [Cu-Zn]                                   |
| Q66H18 | Synaptophysin-like 1                                           |
| G3V6H0 | Ras-related protein Rab-1b                                     |
| P27139 | Carbonic anhydrase 2                                           |
| Q7TP15 | S-methyl-5'-thioadenosine phosphorylase                        |
| Q9ES40 | PRA1 family protein 3                                          |
| P61589 | Transforming protein RhoA                                      |
| G3V7U6 | Calpain 5                                                      |
| P68511 | 14-3-3 protein eta                                             |
| Q01205 | 2-oxoglutarate dehydrogenase complex component E2              |
| P67779 | Prohibitin                                                     |
| Q5FVF4 | Transmembrane 7 superfamily member 3                           |
| Q5BJY9 | Keratin, type I cytoskeletal 18                                |
| F1M5Z5 | Anoctamin-6                                                    |
| D3ZRN3 | Beta-actin-like protein 2                                      |
| O08651 | D-3-phosphoglycerate dehydrogenase                             |
| O88989 | Malate dehydrogenase cytoplasmic                               |
| P11762 | Galectin-1                                                     |
| P27615 | Lysosome membrane protein 2 (CD36)                             |
| Q6AYK6 | Calcyclin-binding protein                                      |
| P06761 | Endoplasmic reticulum chaperone BiP                            |
| Q9QYV0 | Disintegrin and metalloproteinase domain-containing protein 15 |
| P63102 | 14-3-3 protein zeta/delta                                      |
| B0K020 | CDGSH iron-sulfur domain-containing protein 1                  |
| Q9EST6 | Acidic leucine-rich nuclear phosphoprotein 32 family member B  |
| Q78P65 | Rap2A-like protein                                             |
| P07943 | Aldose reductase                                               |
| P32089 | Citrate transport protein                                      |

|        |                                                                                   |
|--------|-----------------------------------------------------------------------------------|
| M0RCF3 | Integrin beta 3                                                                   |
| Q5XI34 | Serine/threonine-protein phosphatase 2A 65 kDa regulatory subunit A alpha isoform |
| Q5XI32 | F-actin-capping protein subunit beta                                              |
| P83732 | 60S ribosomal protein L24                                                         |
| Q5XIV1 | Phosphoglycerate kinase 2                                                         |
| P52555 | Endoplasmic reticulum resident protein 29                                         |
| O88994 | Mitochondrial amidoxime reducing component 2                                      |
| Q5XI38 | Lymphocyte cytosolic protein 1                                                    |
| P04764 | Alpha-enolase                                                                     |
| Q5XI36 | CD97                                                                              |
| B0K010 | Thioredoxin domain-containing 17                                                  |
| Q10758 | Keratin, type II cytoskeletal 8                                                   |
| Q07936 | Annexin A2                                                                        |
| P05197 | Elongation factor 2                                                               |
| Q9R1Z0 | Voltage-dependent anion-selective channel protein 3                               |
| P85968 | 6-phosphogluconate dehydrogenase decarboxylating                                  |
| P63322 | Ras-related protein Ral-A                                                         |
| Q63396 | Activated RNA polymerase II transcriptional coactivator p15                       |
| P54313 | Transducin beta-2                                                                 |
| Q6AYQ9 | Peptidyl-prolyl cis-trans isomerase C                                             |
| F1MA89 | Cyclin Y                                                                          |
| P54311 | Transducin beta-1                                                                 |
| Q6PDU1 | Serine/arginine-rich splicing factor 2                                            |
| Q6AYQ4 | Transmembrane protein 109                                                         |
| O70257 | Syntaxin-7                                                                        |
| O88767 | Protein/nucleic acid deglycase DJ-1                                               |
| D4AEP0 | Adenylosuccinate synthetase isozyme 2                                             |
| P51577 | P2X purinoceptor 4                                                                |
| D3ZUX5 | MICOS complex subunit MIC-19                                                      |
| P35213 | 14-3-3 protein beta/alpha                                                         |
| P34058 | Heat shock protein HSP 90-beta                                                    |
| Q9EQX9 | Ubiquitin-conjugating enzyme E2 N                                                 |
| G3V7P1 | Syntaxin-12                                                                       |
| P15865 | Histone H1.4                                                                      |
| Q91ZN1 | Coronin-1A                                                                        |
| P04785 | Protein disulfide-isomerase                                                       |
| G3V9Y2 | Phospholipid phosphatase 1                                                        |
| G3V7Q7 | Ras GTPase-activating-like protein IQGAP1                                         |
| Q63016 | Large neutral amino acids transporter small subunit 1                             |

|        |                                                                         |
|--------|-------------------------------------------------------------------------|
| Q5EAP4 | Guanine nucleotide binding protein alpha-14                             |
| R9PXR4 | Mitochondrial import receptor subunit TOM70                             |
| P63331 | Serine/threonine-protein phosphatase 2A catalytic subunit alpha isoform |
| P85971 | 6-phosphogluconolactonase                                               |
| D3ZSY5 | keratin 84                                                              |
| Q64244 | ADP-ribosyl cyclase/cyclic ADP-ribose hydrolase 1                       |
| P21531 | 60S ribosomal protein L3                                                |
| P81155 | Voltage-dependent anion-selective channel protein 2                     |
| P31000 | Vimentin                                                                |
| P12368 | cAMP-dependent protein kinase type II-alpha regulatory subunit          |
| F7EPH4 | Inorganic Pyrophosphatase                                               |
| Q5I0E7 | Transmembrane emp24 domain-containing protein 9                         |
| A1L1J8 | Ras-related protein Rab-5b                                              |
| P38983 | 40S ribosomal protein SA                                                |
| B0K031 | 60S ribosomal protein L7, isoform                                       |
| F1LN88 | Aldehyde dehydrogenase                                                  |
| F7FFV2 | keratin 5                                                               |
| Q05982 | Nucleoside diphosphate kinase A                                         |
| P21708 | Mitogen-activated protein kinase 3                                      |
| P04797 | Glyceraldehyde-3-phosphate dehydrogenase                                |
| O35567 | Bifunctional purine biosynthesis protein PURH                           |
| P04897 | Guanine nucleotide-binding protein G(i) subunit alpha-2                 |
| Q8VHF5 | Citrate synthase mitochondrial                                          |
| G3V936 | Citrate synthase                                                        |
| Q08849 | Syntaxin-3                                                              |
| Q8CFN2 | Cell division control protein 42 homolog (CDC42)                        |
| Q9EPV5 | Apoptotic protease-activating factor 1                                  |
| Q5I0D1 | Glyoxalase domain-containing protein 4                                  |
| Q53B90 | Ras-related protein Rab-43                                              |
| P58195 | Phospholipid scramblase 1                                               |
| Q9JHW5 | VAMP7                                                                   |
| Q9JI85 | Nucleobindin-2                                                          |
| P01830 | Thy-1 membrane glycoprotein                                             |
| O70377 | Synaptosomal-associated protein 23 (SNAP-23)                            |
| Q68FP1 | Gelsolin                                                                |
| D4A133 | V-type proton ATPase catalytic subunit A                                |
| P21913 | Succinate dehydrogenase [ubiquinone] iron-sulfur subunit mitochondrial  |
| Q07014 | Tyrosine-protein kinase Lyn                                             |
| D3ZK56 | Ras-related protein Rap-2c                                              |



|        |                                                      |
|--------|------------------------------------------------------|
| Q07984 | Translocon-associated protein subunit delta          |
| Q5XI77 | Annexin A11                                          |
| P31977 | Ezrin                                                |
| Q5XI73 | Rho GDP dissociation inhibitor 1                     |
| P07151 | Beta-2-microglobulin                                 |
| P15999 | ATP synthase subunit alpha mitochondrial             |
| P07150 | Annexin A1                                           |
| Q6AYQ1 | Golgin subfamily A member 7                          |
| P60711 | Actin cytoplasmic 1                                  |
| O35353 | Transducin beta-4                                    |
| B2RYB8 | Integrin beta 2                                      |
| F1LW77 | Ras-related protein Rab-33b                          |
| Q9Z2S9 | Flotillin-2                                          |
| Q5U362 | Annexin A4                                           |
| Q68FR6 | Elongation factor 1-gamma                            |
| Q9Z2L0 | Voltage-dependent anion-selective channel protein 1  |
| B2RYC9 | Glucosylceramidase                                   |
| P51635 | Alcohol dehydrogenase [NADP(+)]                      |
| E9PTU4 | Myosin heavy chain 11                                |
| F1LM82 | Heterogeneous nuclear ribonucleoproteins A2/B1       |
| P11442 | Clathrin heavy chain 1                               |
| B0BN81 | Ribosomal protein S5                                 |
| P12075 | Cytochrome c oxidase subunit 5B mitochondrial        |
| Q05030 | Platelet-derived growth factor receptor beta         |
| G3V7L8 | V-type proton ATPase subunit E 1 isoform             |
| Q62662 | Tyrosine-protein kinase FRK                          |
| P61107 | Ras-related protein Rab-14                           |
| F1LPV0 | Asparagine--tRNA ligase, cytoplasmic                 |
| P61972 | Nuclear transport factor 2                           |
| Q6PCU2 | V-type proton ATPase subunit E 1                     |
| Q5PQL7 | Integral membrane protein 2C                         |
| M0R9L0 | Nascent polypeptide-associated complex subunit alpha |
| P49134 | Integrin beta 1                                      |
| P50475 | Alanine--tRNA ligase cytoplasmic                     |
| G3V712 | keratin 7                                            |
| Q68FQ0 | T-complex protein 1 epsilon                          |
| Q810F4 | Protein FAM3C                                        |
| P31044 | Phosphatidylethanolamine-binding protein 1           |
| Q4QQV0 | Tubulin beta-6                                       |

|        |                                                                            |
|--------|----------------------------------------------------------------------------|
| F1LQ81 | Vesicle-fusing ATPase                                                      |
| Q3B7V5 | Ras-related protein Rab-2b                                                 |
| D4A0T0 | NADH dehydrogenase 1 beta subcomplex subunit 10                            |
| G3V7M2 | Integrin beta 7                                                            |
| G3V6P8 | Guanine nucleotide-binding protein gamma-12                                |
| G3V6P7 | Myosin heavy chain 9                                                       |
| Q04970 | GTPase NRas                                                                |
| D3ZNG3 | Signal peptide peptidase-like 2A                                           |
| Q9Z1J7 | Amino acid transporter                                                     |
| E9PTW1 | Secretory carrier-associated membrane protein                              |
| R9PXU4 | Thioredoxin reductase 1 cytoplasmic                                        |
| D4ADE8 | ATP-dependent RNA helicase DDX3X                                           |
| O88600 | Heat shock 70 kDa protein 4                                                |
| G3V9N9 | alpha-1,2-Mannosidase                                                      |
| Q794F9 | 4F2 cell-surface antigen heavy chain                                       |
| Q6P791 | Ragulator complex protein LAMTOR1                                          |
| F1LNT8 | VAMP8                                                                      |
| P61227 | Ras-related protein Rap-2b                                                 |
| Q6P799 | Serine--tRNA ligase cytoplasmic                                            |
| P62703 | 40S ribosomal protein S4, X isoform                                        |
| P62909 | 40S ribosomal protein S3                                                   |
| Q6AYC4 | Macrophage-capping protein                                                 |
| Q63377 | Sodium/potassium-transporting ATPase subunit beta-3                        |
| P62907 | 60S ribosomal protein L10a                                                 |
| M0RBJ0 | Guanine nucleotide-binding protein gamma-2                                 |
| Q63942 | Ras-related protein Rab-3d                                                 |
| P48721 | Mortalin                                                                   |
| Q63584 | Transmembrane emp24 domain-containing protein 10                           |
| P10960 | Prosaposin                                                                 |
| Q6EV76 | Alpha-(1,6)-fucosyltransferase                                             |
| Q5XIM9 | T-complex protein 1 beta                                                   |
| F1M779 | Clathrin heavy chain                                                       |
| P05065 | Fructose-bisphosphate aldolase A                                           |
| P32551 | Cytochrome b-c1 complex subunit 2 mitochondrial                            |
| B0BN52 | Mitochondrial carrier homolog 2                                            |
| E9PTX9 | Solute carrier family 12 member 2                                          |
| Q5XFX0 | Transgelin-2                                                               |
| Q7TSA0 | Mitochondrial Rho GTPase 2                                                 |
| P61805 | Dolichyl-diphosphooligosaccharide protein glycosyltransferase subunit DAD1 |

|        |                                                                   |
|--------|-------------------------------------------------------------------|
| G3V908 | keratin, type II Kb15                                             |
| P09811 | Glycogen phosphorylase liver form                                 |
| P53987 | Monocarboxylate transporter 1                                     |
| G3V6N2 | Transmembrane emp24 domain-containing protein 4                   |
| P28494 | Alpha-mannosidase 2                                               |
| Q62902 | Lectin mannose-binding 1                                          |
| P61131 | Beta-galactoside alpha-2,3-sialyltransferase 4                    |
| Q6PDV6 | 40S ribosomal protein S14                                         |
| P50399 | Rab GDP dissociation inhibitor beta                               |
| Q6AYD3 | Proliferation-associated protein 2G4                              |
| Q9WVB1 | Ras-related protein Rab-6a                                        |
| Q05175 | Brain acid soluble protein 1                                      |
| B2RYG6 | Ubiquitin thioesterase OTUB1                                      |
| P62278 | 40S ribosomal protein S13                                         |
| Q3T1K5 | F-actin-capping protein subunit alpha-2                           |
| P62138 | Serine/threonine-protein phosphatase PP1-alpha catalytic subunit  |
| P68370 | Tubulin alpha-1A                                                  |
| Q5U316 | Ras-related protein Rab-35                                        |
| P11167 | Solute carrier family 2, facilitated glucose transporter member 1 |
| P31399 | ATP synthase subunit D mitochondrial                              |
| D4A720 | Serine/arginine-rich splicing factor 7 isoform 2                  |
| G3V8L7 | Integrin alpha M                                                  |
| P04642 | L-lactate dehydrogenase A chain                                   |
| Q35509 | Ras-related protein Rab-11b                                       |
| P62828 | GTP-binding nuclear protein Ran                                   |
| P70583 | Deoxyuridine 5'-triphosphate nucleotidohydrolase                  |
| Q6AYI1 | Probable ATP-dependent RNA helicase DDX5                          |
| P70580 | Membrane-associated progesterone receptor component 1             |
| P23358 | 60S ribosomal protein L12                                         |
| Q3T1J1 | Eukaryotic translation initiation factor 5A-1                     |
| F7EWC1 | Vasodilator-stimulated phosphoprotein                             |
| Q66HA6 | ADP-ribosylation factor-like protein 8B                           |
| P11598 | Protein disulfide-isomerase A3                                    |
| P62282 | 40S ribosomal protein S11                                         |
| Q6P3V9 | 60S ribosomal protein L4                                          |
| G3V6T1 | Coatomer subunit alpha                                            |
| Q6P3V8 | Eukaryotic initiation factor 4A-I                                 |
| Q66HA4 | Tax1-binding protein 1 homolog                                    |
| F1LP82 | Ras-related protein Rab-2a                                        |

|        |                                                                     |
|--------|---------------------------------------------------------------------|
| Q62636 | Ras-related protein Rap-1b                                          |
| Q3MIE4 | Synaptic vesicle membrane protein VAT-1 homolog                     |
| Q6P742 | Proteolipid protein 2                                               |
| P04636 | Malate dehydrogenase mitochondrial                                  |
| P62914 | 60S ribosomal protein L11                                           |
| Q5U300 | Ubiquitin-like modifier-activating enzyme 1                         |
| G3V7I0 | Peroxiredoxin-3                                                     |
| P62815 | V-type proton ATPase subunit B                                      |
| Q9JID2 | Guanine nucleotide-binding protein alpha-11                         |
| Q63198 | Contactin 1                                                         |
| P11980 | Pyruvate kinase PKM                                                 |
| Q9Z2J5 | VAMP5                                                               |
| P10719 | ATP synthase subunit beta mitochondrial                             |
| D3ZAY7 | Band 4.1-like protein 2                                             |
| G3V741 | Solute carrier family 25 member 3                                   |
| O88941 | Mannosyl-oligosaccharide glucosidase                                |
| O54980 | Synaptogyrin-2                                                      |
| Q6P6T6 | Cathepsin D                                                         |
| Q4V7D9 | Acid sphingomyelinase-like phosphodiesterase 3B                     |
| Q6S395 | Plectin                                                             |
| F1LMP7 | Granulins                                                           |
| Q5XI04 | Erythrocyte band 7 integral membrane protein                        |
| F1LQJ7 | Phosphoenolpyruvate carboxykinase [GTP], mitochondrial              |
| Q9R1T1 | Barrier-to-autointegration factor                                   |
| P22734 | Catechol O-methyltransferase                                        |
| P62804 | Histone H4                                                          |
| F1LM93 | Tyrosine-protein kinase Yes                                         |
| Q63083 | Nucleobindin-1                                                      |
| Q9JKB7 | Guanine deaminase                                                   |
| P12928 | Pyruvate kinase PKLR                                                |
| Q63081 | Protein disulfide-isomerase A6                                      |
| G3V9S3 | Tyrosine-protein phosphatase non-receptor type 13                   |
| P13832 | Myosin regulatory light chain RLC-A                                 |
| B1WBY5 | DnaJ homolog subfamily C member 11                                  |
| Q62940 | E3 ubiquitin-protein ligase NEDD4                                   |
| Q62658 | Peptidyl-prolyl cis-trans isomerase FKBP1A                          |
| P68255 | 14-3-3 protein theta                                                |
| Q63803 | Guanine nucleotide-binding protein G(s) subunit alpha isoforms XLas |
| Q6P6U0 | Tyrosine-protein kinase Fgr                                         |

|        |                                                        |
|--------|--------------------------------------------------------|
| Q62753 | Syntaxin-binding protein 2                             |
| D4A5K6 | Zinc metallopeptidase STE24                            |
| P13838 | Leukosialin                                            |
| Q06647 | ATP synthase subunit O mitochondrial                   |
| G3V637 | Syntaxin-binding protein 2, isoform                    |
| P62859 | 40S ribosomal protein S28                              |
| Q6IN24 | Galectin-8                                             |
| G3V8I4 | Syntaxin-4A                                            |
| Q6IFV6 | Keratin 35                                             |
| P09895 | 60S ribosomal protein L5                               |
| Q63507 | 60S ribosomal protein L14                              |
| P10111 | Peptidyl-prolyl cis-trans isomerase A                  |
| G3V679 | Transferrin receptor protein 1                         |
| P62260 | 14-3-3 protein epsilon                                 |
| Q5XIE8 | Integral membrane protein 2B                           |
| B2GUZ9 | Fam49b protein                                         |
| Q6IG03 | Keratin, type II cytoskeletal 73                       |
| Q6IG02 | Keratin, type II cytoskeletal 2 epidermal              |
| Q6IG01 | Keratin, type II cytoskeletal 1B                       |
| Q9Z0V6 | Thioredoxin-dependent peroxide reductase mitochondrial |
| Q3SWT0 | Platelet endothelial cell adhesion molecule (Pecam1)   |
| Q6IN10 | Endothelin-converting enzyme 1 Isoform                 |
| Q6IG05 | Keratin, type II cytoskeletal 75                       |
| Q6IFW6 | Keratin, type I cytoskeletal 10                        |
| P09495 | Tropomyosin alpha-4                                    |
| Q5XIF6 | Tubulin alpha-4A                                       |
| D3ZWS0 | Protein scribble homolog                               |
| P62963 | Profilin-1                                             |
| Q66HD0 | Endoplasmin                                            |
| P62250 | 40S ribosomal protein S16                              |
| Q91Y81 | Septin-2                                               |
| Q99P74 | Ras-related protein Rab-27b                            |
| P70550 | Ras-related protein Rab-8b                             |
| Q99P75 | Ras-related protein Rab-9a                             |
| Q6IG12 | Keratin, type II cytoskeletal 7                        |
| P35704 | Peroxiredoxin-2                                        |
| Q2I6B2 | V-type proton ATPase subunit A1                        |
| G3V8G5 | Golgi apparatus protein 1                              |
| P62630 | Elongation factor 1-alpha 1                            |

|        |                                                       |
|--------|-------------------------------------------------------|
| P62775 | Myotrophin                                            |
| Q6P6Q2 | Keratin, type II cytoskeletal 5                       |
| P62246 | 40S ribosomal protein S15a                            |
| D3ZNQ6 | NEDD8-conjugating enzyme Ubc12                        |
| P62832 | 60S ribosomal protein L23                             |
| P05712 | Ras-related protein Rab-2a                            |
| P62836 | Ras-related protein Rap-1a                            |
| P62243 | 40S ribosomal protein S8                              |
| E9PSV5 | Phosphoserine aminotransferase                        |
| Q9JLT0 | Myosin heavy chain 10                                 |
| P82995 | Heat shock protein HSP 90-alpha                       |
| P42667 | SEC11 homolog A                                       |
| G3V8F5 | Mitochondrial import receptor subunit TOM40 homolog   |
| Q6IN37 | GM2 ganglioside activator                             |
| P80254 | D-dopachrome decarboxylase                            |
| P13383 | Nucleolin                                             |
| Q63610 | Tropomyosin alpha-3                                   |
| Q66X93 | Staphylococcal nuclease domain-containing protein 1   |
| Q6IFZ5 | Keratin, type II cytoskeletal 2 oral                  |
| Q5VLR5 | Endoplasmic reticulum resident protein 44             |
| P62986 | Ubiquitin-60S ribosomal protein L40                   |
| Q6RUV5 | Ras-related C3 botulinum toxin substrate 1 (Rac1)     |
| P62982 | Ubiquitin-40S ribosomal protein S27a                  |
| P82471 | Guanine nucleotide-binding protein G(q) subunit alpha |
| B4F7C2 | Tubulin beta-4A                                       |
| E9PT65 | Radixin                                               |
| Q9EPH8 | Polyadenylate-binding protein 1                       |
| Q6MG61 | Chloride intracellular channel protein 1              |
| P19944 | 60S acidic ribosomal protein P1                       |
| Q6TXF3 | Acyl-CoA-binding protein                              |
| P19945 | 60S acidic ribosomal protein P0                       |
| B2RZ27 | SH3 domain-binding glutamic acid-rich-like protein 3  |
| B2RYQ2 | Serine/threonine-protein phosphatase 2A activator     |
| P11240 | Cytochrome c oxidase subunit 5A mitochondrial         |
| P11232 | Thioredoxin                                           |
| P05982 | NAD(P)H dehydrogenase [quinone] 1                     |
| P10252 | CD48 antigen                                          |
| P69897 | Tubulin beta-5                                        |
| P62890 | 60S ribosomal protein L30                             |

|        |                                                        |
|--------|--------------------------------------------------------|
| P63095 | Guanine nucleotide-binding protein G(s) subunit alpha  |
| P52296 | Importin subunit beta-1                                |
| D3ZTJ0 | Protein XRP2                                           |
| Q4QRB4 | Tubulin beta-3                                         |
| Q6P9V9 | Tubulin alpha-1B                                       |
| B2GUV5 | V-type proton ATPase subunit G 1                       |
| P18418 | Calreticulin                                           |
| Q6P9V1 | CD81 molecule                                          |
| P13221 | Aspartate aminotransferase cytoplasmic                 |
| Q09073 | ADP/ATP translocase 2                                  |
| Q6AYA5 | Transmembrane protein 106 B                            |
| P54921 | Alpha-soluble NSF attachment protein (SNAP-alpha)      |
| P25113 | Phosphoglycerate mutase 1                              |
| Q3KRD8 | Eukaryotic translation initiation factor 6             |
| G3V8C4 | Chloride intracellular channel protein 4               |
| P61983 | 14-3-3 protein gamma                                   |
| P49242 | 40S ribosomal protein S3a                              |
| B0BNA5 | Coactosin-like protein                                 |
| P02401 | 60S acidic ribosomal protein P2                        |
| P50137 | Transketolase                                          |
| P09527 | Ras-related protein Rab-7a                             |
| P10888 | Cytochrome c oxidase subunit 4 isoform 1 mitochondrial |
| Q66HG5 | Transmembrane 9 superfamily member 2                   |
| Q5U3Z7 | Serine hydroxymethyltransferase                        |
| P48500 | Triosephosphate isomerase                              |
| P23640 | Ras-related protein Rab-27a                            |
| P62747 | Rho-related GTP-binding protein RhoB                   |
| O70595 | ATP-binding cassette sub-family B member 6             |
| B2GV92 | Prostaglandin E synthase 3                             |
| P62083 | 40S ribosomal protein S7                               |
| Q6IFU9 | keratin 16                                             |
| Q6P9T8 | Tubulin beta-4B                                        |
| Q6IFU8 | Keratin, type I cytoskeletal 17                        |
| P04157 | Receptor-type tyrosine-protein phosphatase C (CD45)    |
| Q6IFV3 | Keratin, type I cytoskeletal 15                        |
| Q6IFV1 | Keratin, type I cytoskeletal 14                        |
| P20070 | NADH-cytochrome b5 reductase 3                         |
| Q5XIH7 | Prohibitin 2                                           |
| G3V8A5 | Vacuolar protein sorting-associated protein 35         |

|        |                                                                         |
|--------|-------------------------------------------------------------------------|
| P11348 | Dihydropteridine reductase                                              |
| D4A465 | Ragulator complex protein LAMTOR2                                       |
| Q5I0G4 | Glycine--tRNA ligase                                                    |
| Q5U1Y2 | Ras-related C3 botulinum toxin substrate 2 (Rac2)                       |
| P85007 | Immediate early response 3-interacting protein 1                        |
| Q00238 | Intercellular adhesion molecule 1 (ICAM1)                               |
| Q5M843 | 2-oxoglutarate and iron-dependent oxygenase domain-containing protein 3 |
| Q5EB77 | Ras-related protein Rab-18                                              |
| Q6AY18 | GTP-binding protein SAR1a                                               |
| D3ZIP8 | Endonuclease domain containing 1                                        |
| P19804 | Nucleoside diphosphate kinase B                                         |
| D4ADS9 | EFR3 homolog A                                                          |
| B2GVB9 | Fermt3 protein                                                          |
| B0BNG3 | Vesicular integral-membrane protein VIP36                               |
| Q6AXT5 | Ras-related protein Rab-21                                              |
| Q6NYB7 | Ras-related protein Rab-1a                                              |
| D3ZPR0 | Exportin-2                                                              |
| P19511 | ATP synthase F(0) complex subunit B1 mitochondrial                      |
| G3V8Z1 | Linker for activation of T-cells family member 2 (NTAL)                 |
| Q76GL9 | Neutral amino acid transporter A                                        |
| F1LNF0 | Myosin heavy chain 14                                                   |
| P17074 | 40S ribosomal protein S19                                               |
| Q5M7T6 | V-type proton ATPase subunit D 1                                        |
| P63245 | Receptor of activated protein C kinase 1 (RACK1)                        |
| Q8SEZ5 | Cytochrome c oxidase subunit 2                                          |
| Q4KM73 | UMP-CMP kinase                                                          |
| A1L134 | Ancient ubiquitous protein 1                                            |
| P46462 | Transitional endoplasmic reticulum ATPase                               |
| P35171 | Cytochrome c oxidase subunit 7A2                                        |
| P04961 | Proliferating cell nuclear antigen                                      |
| Q32PX6 | Rho-related GTP-binding protein RhoG                                    |
| Q3KRC3 | Signal recognition particle receptor alpha                              |
| Q6AXS5 | Plasminogen activator inhibitor 1 RNA-binding protein                   |
| Q6AXS4 | Renin receptor                                                          |
| P05426 | 60S ribosomal protein L7                                                |
| D4A4T0 | STIP1 homology and U box-containing protein 1                           |
| D4A0E2 | NSF attachment protein gamma                                            |
| P16617 | Phosphoglycerate kinase 1                                               |
| P45592 | Cofilin-1                                                               |



|        |                                                                  |
|--------|------------------------------------------------------------------|
| Q01621 | Tyrosine-protein kinase LCK                                      |
| F1LZX9 | Integrin alpha 5                                                 |
| F1MAS0 | keratin 32                                                       |
| Q9JJ19 | Na(+)/H(+) exchange regulatory cofactor NHE-RF1                  |
| P08753 | Guanine nucleotide-binding protein G(k) subunit alpha            |
| D3ZPP2 | ADP-ribosylation factor-like protein 8A                          |
| P63269 | Actin gamma-enteric smooth muscle                                |
| P15429 | Beta-enolase                                                     |
| Q63692 | Hsp90 co-chaperone Cdc37                                         |
| P97675 | Ectonucleotide pyrophosphatase/phosphodiesterase family member 3 |
| Q5XIA8 | Growth hormone-inducible transmembrane protein                   |
| Q5M7W6 | Protein FAM234A                                                  |
| D4A9L2 | Serine/arginine-rich splicing factor 1                           |
| P35289 | Ras-related protein Rab-15                                       |
| D3ZZR9 | Peptidylprolyl isomerase                                         |
| P63018 | Heat shock cognate 71 kDa protein                                |
| P35565 | Calnexin                                                         |
| Q9R0C5 | Polypeptide N-acetylgalactosaminyltransferase 7                  |
| B0BNK1 | Ras-related protein Rab-5c                                       |
| P17046 | Lysosome-associated membrane glycoprotein 2 (Lamp2)              |
| G3V6D3 | ATP synthase subunit beta                                        |
| D3ZDR2 | Charged multivesicular body protein 6                            |
| E9PTI1 | V-type proton ATPase subunit H                                   |
| P85108 | Tubulin beta-2A                                                  |
| D3ZZS8 | V-type proton ATPase subunit B, kidney isoform                   |
| P35435 | ATP synthase subunit gamma mitochondrial                         |
| D3ZGM7 | Peptidase inhibitor 16                                           |
| Q08163 | Adenylyl cyclase-associated protein 1                            |
| P26453 | Basigin                                                          |
| Q5RKJ9 | Ras-related protein Rab-10                                       |
| Q5M860 | Rho GDP dissociation inhibitor 2                                 |
| Q8CGU6 | Nicastrin                                                        |
| P63039 | 60 kDa heat shock protein                                        |
| P14659 | Heat shock-related 70 kDa protein 2                              |
| Q6IRF8 | V-type proton ATPase subunit S1                                  |
| P00507 | Aspartate aminotransferase mitochondrial                         |
| Q3MHS9 | Chaperonin-containing TCP1 subunit 6A                            |
| M0RC99 | Ras-related protein Rab-5a                                       |
| Q9JK11 | Reticulon-4                                                      |

|        |                                                       |
|--------|-------------------------------------------------------|
| P14562 | Lysosome-associated membrane glycoprotein 1 (Lamp1)   |
| Q6AXV4 | Sorting and assembly machinery component 50 homolog   |
| P14668 | Annexin A5                                            |
| P49432 | Pyruvate dehydrogenase component E1 beta              |
| Q4G075 | Leukocyte elastase inhibitor                          |
| Q9Z1E1 | Flotillin-1                                           |
| Q6IMF3 | Keratin, type II cytoskeletal 1                       |
| Q920J4 | Thioredoxin-like protein 1                            |
| P24368 | Peptidyl-prolyl cis-trans isomerase B                 |
| Q499P3 | C1GALT1-specific chaperone 1                          |
| B0BNJ1 | Sorcin                                                |
| P19627 | Guanine nucleotide-binding protein G(z) subunit alpha |
| G3V9A3 | 14-3-3 protein sigma                                  |
| P35280 | Ras-related protein Rab-8a                            |

| ID Term            | GO Term                  | Fold Enriched | Count                                                    | <i>p</i> -value | FDR       |
|--------------------|--------------------------|---------------|----------------------------------------------------------|-----------------|-----------|
| GO:0031988         | MEMBRANE-BOUNDED VESICLE | 3.18          | 538                                                      | 2.78E-166       | 4.30E-163 |
| Annotated proteins |                          |               |                                                          |                 |           |
| Protein Accession  |                          |               | Protein Identification                                   |                 |           |
| D3ZAF6             |                          |               | ATP synthase subunit F mitochondrial                     |                 |           |
| Q6P503             |                          |               | V-type proton ATPase subunit D                           |                 |           |
| B5DEH2             |                          |               | Erlin-2                                                  |                 |           |
| F1M2P8             |                          |               | Protein kinase C alpha                                   |                 |           |
| P21961             |                          |               | Mast cell carboxypeptidase A                             |                 |           |
| P50408             |                          |               | V-type proton ATPase subunit F                           |                 |           |
| Q62876             |                          |               | Synaptogyrin-1                                           |                 |           |
| Q63716             |                          |               | Peroxiredoxin-1                                          |                 |           |
| P26772             |                          |               | 10 kDa heat shock protein mitochondrial                  |                 |           |
| Q5U204             |                          |               | Ragulator complex protein LAMTOR3                        |                 |           |
| P0DP29             |                          |               | Calmodulin-1                                             |                 |           |
| G3V852             |                          |               | Talin-1                                                  |                 |           |
| D3ZTX0             |                          |               | Transmembrane emp24 domain-containing protein 7          |                 |           |
| P50503             |                          |               | Hsc70-interacting protein                                |                 |           |
| O08623             |                          |               | Sequestosome-1                                           |                 |           |
| P06685             |                          |               | Sodium/potassium-transporting ATPase subunit alpha-1     |                 |           |
| Q9ESV6             |                          |               | Glyceraldehyde-3-phosphate dehydrogenase testis-specific |                 |           |
| Q5XI52             |                          |               | Vezatin                                                  |                 |           |

|        |                                                                                   |
|--------|-----------------------------------------------------------------------------------|
| P07632 | Superoxide dismutase [Cu-Zn]                                                      |
| Q66H18 | Synaptophysin-like 1                                                              |
| G3V6H0 | Ras-related protein Rab-1b                                                        |
| P27139 | Carbonic anhydrase 2                                                              |
| Q7TP15 | S-methyl-5'-thioadenosine phosphorylase                                           |
| Q9ES40 | PRA1 family protein 3                                                             |
| P61589 | Transforming protein RhoA                                                         |
| G3V7U6 | Calpain 5                                                                         |
| P68511 | 14-3-3 protein eta                                                                |
| Q01205 | 2-oxoglutarate dehydrogenase complex component E2                                 |
| P67779 | Prohibitin                                                                        |
| Q5FVF4 | Transmembrane 7 superfamily member 3                                              |
| Q5BJY9 | Keratin, type I cytoskeletal 18                                                   |
| F1M5Z5 | Anoctamin-6                                                                       |
| D3ZRN3 | Beta-actin-like protein 2                                                         |
| Q62991 | Syntaxin-binding protein 1-like 2                                                 |
| O08651 | D-3-phosphoglycerate dehydrogenase                                                |
| O88989 | Malate dehydrogenase cytoplasmic                                                  |
| P11762 | Galectin-1                                                                        |
| P27615 | Lysosome membrane protein 2 (CD36)                                                |
| Q6AYK6 | Calcyclin-binding protein                                                         |
| P06761 | Endoplasmic reticulum chaperone BiP                                               |
| Q9QYV0 | Disintegrin and metalloproteinase domain-containing protein 15                    |
| P63102 | 14-3-3 protein zeta/delta                                                         |
| B0K020 | CDGSH iron-sulfur domain-containing protein 1                                     |
| Q9EST6 | Acidic leucine-rich nuclear phosphoprotein 32 family member B                     |
| Q78P65 | Rap2A-like protein                                                                |
| P07943 | Aldose reductase                                                                  |
| P32089 | Citrate transport protein                                                         |
| M0RCF3 | Integrin beta 3                                                                   |
| Q5XI34 | Serine/threonine-protein phosphatase 2A 65 kDa regulatory subunit A alpha isoform |
| Q5XI32 | F-actin-capping protein subunit beta                                              |
| P83732 | 60S ribosomal protein L24                                                         |
| Q5XIV1 | Phosphoglycerate kinase 2                                                         |
| P52555 | Endoplasmic reticulum resident protein 29                                         |
| O88994 | Mitochondrial amidoxime reducing component 2                                      |
| Q5XI38 | Lymphocyte cytosolic protein 1                                                    |
| P04764 | Alpha-enolase                                                                     |
| Q5XI36 | CD97                                                                              |

|        |                                                                         |
|--------|-------------------------------------------------------------------------|
| B0K010 | Thioredoxin domain-containing 17                                        |
| Q10758 | Keratin, type II cytoskeletal 8                                         |
| P06765 | Platelet factor 4                                                       |
| Q07936 | Annexin A2                                                              |
| P05197 | Elongation factor 2                                                     |
| Q9R1Z0 | Voltage-dependent anion-selective channel protein 3                     |
| P85968 | 6-phosphogluconate dehydrogenase decarboxylating                        |
| P63322 | Ras-related protein Ral-A                                               |
| D3ZD83 | Major facilitator superfamily domain-containing protein 10              |
| Q63396 | Activated RNA polymerase II transcriptional coactivator p15             |
| P54313 | Transducin beta-2                                                       |
| Q6AYQ9 | Peptidyl-prolyl cis-trans isomerase C                                   |
| F1MA89 | Cyclin Y                                                                |
| P54311 | Transducin beta-1                                                       |
| Q6PDU1 | Serine/arginine-rich splicing factor 2                                  |
| Q6AYQ4 | Transmembrane protein 109                                               |
| O70257 | Syntaxin-7                                                              |
| O88767 | Protein/nucleic acid deglycase DJ-1                                     |
| D4AEP0 | Adenylosuccinate synthetase isozyme 2                                   |
| P51577 | P2X purinoceptor 4                                                      |
| P35213 | 14-3-3 protein beta/alpha                                               |
| D3ZUX5 | MICOS complex subunit MIC-19                                            |
| P34058 | Heat shock protein HSP 90-beta                                          |
| O08775 | Vascular endothelial growth factor receptor 2                           |
| Q66H80 | Coatmer subunit delta                                                   |
| Q9EQX9 | Ubiquitin-conjugating enzyme E2 N                                       |
| G3V7P1 | Syntaxin-12                                                             |
| P15865 | Histone H1.4                                                            |
| Q920P6 | Adenosine deaminase                                                     |
| Q91ZN1 | Coronin-1A                                                              |
| P04785 | Protein disulfide-isomerase                                             |
| G3V9Y2 | Phospholipid phosphatase 1                                              |
| G3V7Q7 | Ras GTPase-activating-like protein IQGAP1                               |
| Q63016 | Large neutral amino acids transporter small subunit 1                   |
| O35165 | Golgi SNAP receptor complex member 2                                    |
| Q5EAP4 | Guanine nucleotide binding protein alpha-14                             |
| R9PXR4 | Mitochondrial import receptor subunit TOM70                             |
| P63331 | Serine/threonine-protein phosphatase 2A catalytic subunit alpha isoform |
| Q63116 | Mast/stem cell growth factor receptor                                   |

|        |                                                                        |
|--------|------------------------------------------------------------------------|
| P85971 | 6-phosphogluconolactonase                                              |
| D3ZSY5 | keratin 84                                                             |
| Q64244 | ADP-ribosyl cyclase/cyclic ADP-ribose hydrolase 1                      |
| P81155 | Voltage-dependent anion-selective channel protein 2                    |
| P21531 | 60S ribosomal protein L3                                               |
| P31000 | Vimentin                                                               |
| P12368 | cAMP-dependent protein kinase type II-alpha regulatory subunit         |
| Q9WU70 | Syntaxin-binding protein 5                                             |
| F7EPH4 | Inorganic Pyrophosphatase                                              |
| Q5I0E7 | Transmembrane emp24 domain-containing protein 9                        |
| A1L1J8 | Ras-related protein Rab-5b                                             |
| P38983 | 40S ribosomal protein SA                                               |
| B0K031 | 60S ribosomal protein L7, isoform                                      |
| F1LN88 | Aldehyde dehydrogenase                                                 |
| F7FFV2 | keratin 5                                                              |
| Q05982 | Nucleoside diphosphate kinase A                                        |
| F1LQR8 | Inositol 1,4,5-trisphosphate receptor type 2                           |
| P21708 | Mitogen-activated protein kinase 3                                     |
| P04797 | Glyceraldehyde-3-phosphate dehydrogenase                               |
| O35567 | Bifunctional purine biosynthesis protein PURH                          |
| P04897 | Guanine nucleotide-binding protein G(i) subunit alpha-2                |
| G3V936 | Citrate synthase                                                       |
| Q8VHF5 | Citrate synthase mitochondrial                                         |
| Q08849 | Syntaxin-3                                                             |
| Q8CFN2 | Cell division control protein 42 homolog (CDC42)                       |
| Q9EPV5 | Apoptotic protease-activating factor 1                                 |
| Q5I0D1 | Glyoxalase domain-containing protein 4                                 |
| Q53B90 | Ras-related protein Rab-43                                             |
| P58195 | Phospholipid scramblase 1                                              |
| Q9JHW5 | VAMP7                                                                  |
| Q9JI85 | Nucleobindin-2                                                         |
| P01830 | Thy-1 membrane glycoprotein                                            |
| O70377 | Synaptosomal-associated protein 23 (SNAP-23)                           |
| Q68FP1 | Gelsolin                                                               |
| D4A133 | V-type proton ATPase catalytic subunit A                               |
| P21913 | Succinate dehydrogenase [ubiquinone] iron-sulfur subunit mitochondrial |
| P51146 | Ras-related protein Rab-4b                                             |
| Q07014 | Tyrosine-protein kinase Lyn                                            |
| D3ZK56 | Ras-related protein Rap-2c                                             |

|        |                                                                         |
|--------|-------------------------------------------------------------------------|
| Q07984 | Translocon-associated protein subunit delta                             |
| Q5XI77 | Annexin A11                                                             |
| P31977 | Ezrin                                                                   |
| Q5XI73 | Rho GDP dissociation inhibitor 1                                        |
| P07151 | Beta-2-microglobulin                                                    |
| P15999 | ATP synthase subunit alpha mitochondrial                                |
| P07150 | Annexin A1                                                              |
| Q6AYQ1 | Golgin subfamily A member 7                                             |
| P60711 | Actin cytoplasmic 1                                                     |
| O35353 | Transducin beta-4                                                       |
| B2RYB8 | Integrin beta 2                                                         |
| F1LW77 | Ras-related protein Rab-33b                                             |
| Q9Z2S9 | Flotillin-2                                                             |
| P07153 | Dolichyl-diphosphooligosaccharide protein glycosyltransferase subunit 1 |
| Q5U362 | Annexin A4                                                              |
| Q9Z2L0 | Voltage-dependent anion-selective channel protein 1                     |
| Q68FR6 | Elongation factor 1-gamma                                               |
| B2RYC9 | Glucosylceramidase                                                      |
| P51635 | Alcohol dehydrogenase [NADP(+)]                                         |
| E9PTU4 | Myosin heavy chain 11                                                   |
| F1LM82 | Heterogeneous nuclear ribonucleoproteins A2/B1                          |
| P11442 | Clathrin heavy chain 1                                                  |
| B0BN81 | Ribosomal protein S5                                                    |
| P12075 | Cytochrome c oxidase subunit 5B mitochondrial                           |
| Q05030 | Platelet-derived growth factor receptor beta                            |
| G3V7L8 | V-type proton ATPase subunit E 1 isoform                                |
| Q62662 | Tyrosine-protein kinase FRK                                             |
| P61107 | Ras-related protein Rab-14                                              |
| F1LPV0 | Asparagine--tRNA ligase, cytoplasmic                                    |
| P61972 | Nuclear transport factor 2                                              |
| Q6PCU2 | V-type proton ATPase subunit E 1                                        |
| Q5PQL7 | Integral membrane protein 2C                                            |
| M0R9L0 | Nascent polypeptide-associated complex subunit alpha                    |
| P49134 | Integrin beta 1                                                         |
| P50475 | Alanine--tRNA ligase cytoplasmic                                        |
| G3V712 | keratin 7                                                               |
| Q68FQ0 | T-complex protein 1 epsilon                                             |
| Q810F4 | Protein FAM3C                                                           |
| G3V8Q1 | Coatomer subunit epsilon                                                |

|        |                                                                          |
|--------|--------------------------------------------------------------------------|
| P31044 | Phosphatidylethanolamine-binding protein 1                               |
| E9PU77 | Synaptotagmin-like protein 3                                             |
| Q4QQV0 | Tubulin beta-6                                                           |
| F1LQ81 | Vesicle-fusing ATPase                                                    |
| Q63269 | Inositol 1,4,5-trisphosphate receptor type 3                             |
| Q3B7V5 | Ras-related protein Rab-2b                                               |
| D4A0T0 | NADH dehydrogenase 1 beta subcomplex subunit 10                          |
| G3V7M2 | Integrin beta 7                                                          |
| G3V6P8 | Guanine nucleotide-binding protein gamma-12                              |
| G3V6P7 | Myosin heavy chain 9                                                     |
| Q04970 | GTPase NRas                                                              |
| D3ZNG3 | Signal peptide peptidase-like 2A                                         |
| Q9Z1J7 | Amino acid transporter                                                   |
| Q9WUD2 | Transient receptor potential cation channel subfamily V member 2 (TRPV2) |
| E9PTW1 | Secretory carrier-associated membrane protein                            |
| R9PXU4 | Thioredoxin reductase 1 cytoplasmic                                      |
| F1LSN4 | Fibroblast growth factor receptor                                        |
| D4ADE8 | ATP-dependent RNA helicase DDX3X                                         |
| O88600 | Heat shock 70 kDa protein 4                                              |
| G3V9N9 | alpha-1,2-Mannosidase                                                    |
| Q794F9 | 4F2 cell-surface antigen heavy chain                                     |
| Q6P791 | Ragulator complex protein LAMTOR1                                        |
| F1LNT8 | VAMP8                                                                    |
| P61227 | Ras-related protein Rap-2b                                               |
| Q6P799 | Serine--tRNA ligase cytoplasmic                                          |
| P62703 | 40S ribosomal protein S4, X isoform                                      |
| P62909 | 40S ribosomal protein S3                                                 |
| P62907 | 60S ribosomal protein L10a                                               |
| Q6AYC4 | Macrophage-capping protein                                               |
| Q63377 | Sodium/potassium-transporting ATPase subunit beta-3                      |
| M0RBJ0 | Guanine nucleotide-binding protein gamma-2                               |
| Q63942 | Ras-related protein Rab-3d                                               |
| P48721 | Mortalin                                                                 |
| Q63584 | Transmembrane emp24 domain-containing protein 10                         |
| P10960 | Prosaposin                                                               |
| Q5PQM0 | Transmembrane protein 168                                                |
| Q6EV76 | Alpha-(1,6)-fucosyltransferase                                           |
| Q5XIM9 | T-complex protein 1 beta                                                 |
| F1M779 | Clathrin heavy chain                                                     |

|        |                                                                            |
|--------|----------------------------------------------------------------------------|
| P05065 | Fructose-bisphosphate aldolase A                                           |
| P32551 | Cytochrome b-c1 complex subunit 2 mitochondrial                            |
| B0BN52 | Mitochondrial carrier homolog 2                                            |
| E9PTX9 | Solute carrier family 12 member 2                                          |
| Q5XFX0 | Transgelin-2                                                               |
| Q7TSA0 | Mitochondrial Rho GTPase 2                                                 |
| P61805 | Dolichyl-diphosphooligosaccharide protein glycosyltransferase subunit DAD1 |
| G3V908 | keratin, type II Kb15                                                      |
| P53987 | Monocarboxylate transporter 1                                              |
| P09811 | Glycogen phosphorylase liver form                                          |
| G3V6N2 | Transmembrane emp24 domain-containing protein 4                            |
| Q62902 | Lectin mannose-binding 1                                                   |
| P28494 | Alpha-mannosidase 2                                                        |
| P61131 | Beta-galactoside alpha-2,3-sialyltransferase 4                             |
| Q6PDV6 | 40S ribosomal protein S14                                                  |
| P50399 | Rab GDP dissociation inhibitor beta                                        |
| Q6AYD3 | Proliferation-associated protein 2G4                                       |
| Q9WVB1 | Ras-related protein Rab-6a                                                 |
| Q05175 | Brain acid soluble protein 1                                               |
| Q62839 | Golgin subfamily A member 2                                                |
| B2RYG6 | Ubiquitin thioesterase OTUB1                                               |
| P62278 | 40S ribosomal protein S13                                                  |
| Q3T1K5 | F-actin-capping protein subunit alpha-2                                    |
| P62138 | Serine/threonine-protein phosphatase PP1-alpha catalytic subunit           |
| P68370 | Tubulin alpha-1A                                                           |
| Q5U316 | Ras-related protein Rab-35                                                 |
| P11167 | Solute carrier family 2, facilitated glucose transporter member 1          |
| P31399 | ATP synthase subunit D mitochondrial                                       |
| D4A720 | Serine/arginine-rich splicing factor 7 isoform 2                           |
| G3V8L7 | Integrin alpha M                                                           |
| P04642 | L-lactate dehydrogenase A chain                                            |
| O35509 | Ras-related protein Rab-11b                                                |
| P62828 | GTP-binding nuclear protein Ran                                            |
| Q6AYI1 | Probable ATP-dependent RNA helicase DDX5                                   |
| P70583 | Deoxyuridine 5'-triphosphate nucleotidohydrolase                           |
| P70580 | Membrane-associated progesterone receptor component 1                      |
| P23358 | 60S ribosomal protein L12                                                  |
| D4ABY2 | Coatomer subunit gamma 2                                                   |
| Q3T1J1 | Eukaryotic translation initiation factor 5A-1                              |



|        |                                                        |
|--------|--------------------------------------------------------|
| D4AEG2 | Ras-related protein Rab-32                             |
| F7EWC1 | Vasodilator-stimulated phosphoprotein                  |
| Q66HA6 | ADP-ribosylation factor-like protein 8B                |
| G3V6T7 | Protein disulfide-isomerase A4                         |
| P11598 | Protein disulfide-isomerase A3                         |
| P62282 | 40S ribosomal protein S11                              |
| Q6P3V9 | 60S ribosomal protein L4                               |
| G3V6T1 | Coatomer subunit alpha                                 |
| Q6P3V8 | Eukaryotic initiation factor 4A-I                      |
| Q66HA4 | Tax1-binding protein 1 homolog                         |
| F1LP82 | Ras-related protein Rab-2a                             |
| Q62636 | Ras-related protein Rap-1b                             |
| Q6P742 | Proteolipid protein 2                                  |
| Q3MIE4 | Synaptic vesicle membrane protein VAT-1 homolog        |
| P04636 | Malate dehydrogenase mitochondrial                     |
| P62914 | 60S ribosomal protein L11                              |
| Q5U300 | Ubiquitin-like modifier-activating enzyme 1            |
| G3V7I0 | Peroxiredoxin-3                                        |
| P62815 | V-type proton ATPase subunit B                         |
| Q9JID2 | Guanine nucleotide-binding protein alpha-11            |
| Q63198 | Contactin 1                                            |
| P11980 | Pyruvate kinase PKM                                    |
| Q9Z2J5 | VAMP5                                                  |
| P10719 | ATP synthase subunit beta mitochondrial                |
| D3ZAY7 | Band 4.1-like protein 2                                |
| G3V741 | Solute carrier family 25 member 3                      |
| O88941 | Mannosyl-oligosaccharide glucosidase                   |
| O54980 | Synaptogyrin-2                                         |
| Q6P6T6 | Cathepsin D                                            |
| Q4V7D9 | Acid sphingomyelinase-like phosphodiesterase 3B        |
| Q6S395 | Plectin                                                |
| F1LMP7 | Granulins                                              |
| Q5XI04 | Erythrocyte band 7 integral membrane protein           |
| F1LQJ7 | Phosphoenolpyruvate carboxykinase [GTP], mitochondrial |
| Q9R1T1 | Barrier-to-autointegration factor                      |
| P22734 | Catechol O-methyltransferase                           |
| P62804 | Histone H4                                             |
| Q63483 | Ras-related protein Rab-38                             |
| F1LM93 | Tyrosine-protein kinase Yes                            |

|        |                                                                     |
|--------|---------------------------------------------------------------------|
| Q63083 | Nucleobindin-1                                                      |
| Q9JKB7 | Guanine deaminase                                                   |
| P12928 | Pyruvate kinase PKLR                                                |
| Q63081 | Protein disulfide-isomerase A6                                      |
| P13832 | Myosin regulatory light chain RLC-A                                 |
| G3V9S3 | Tyrosine-protein phosphatase non-receptor type 13                   |
| B1WBY5 | DnaJ homolog subfamily C member 11                                  |
| Q62940 | E3 ubiquitin-protein ligase NEDD4                                   |
| Q62658 | Peptidyl-prolyl cis-trans isomerase FKBP1A                          |
| P68255 | 14-3-3 protein theta                                                |
| Q63803 | Guanine nucleotide-binding protein G(s) subunit alpha isoforms XLas |
| Q6P6U0 | Tyrosine-protein kinase Fgr                                         |
| Q62753 | Syntaxin-binding protein 2                                          |
| D4A5K6 | Zinc metalloproteinase STE24                                        |
| P13838 | Leukosialin                                                         |
| Q06647 | ATP synthase subunit O mitochondrial                                |
| G3V637 | Syntaxin-binding protein 2, isoform                                 |
| P62859 | 40S ribosomal protein S28                                           |
| Q6IN24 | Galectin-8                                                          |
| Q6PEC3 | Protein YIF1B                                                       |
| G3V8I4 | Syntaxin-4A                                                         |
| Q6IFV6 | Keratin 35                                                          |
| P09895 | 60S ribosomal protein L5                                            |
| Q63507 | 60S ribosomal protein L14                                           |
| P10111 | Peptidyl-prolyl cis-trans isomerase A                               |
| Q5XIE0 | Acidic leucine-rich nuclear phosphoprotein 32 family member E       |
| G3V679 | Transferrin receptor protein 1                                      |
| P29995 | Inositol 1,4,5-trisphosphate receptor type 2                        |
| P62260 | 14-3-3 protein epsilon                                              |
| Q5XIE8 | Integral membrane protein 2B                                        |
| B2GUZ9 | Fam49b protein                                                      |
| Q6IG03 | Keratin, type II cytoskeletal 73                                    |
| Q6IG02 | Keratin, type II cytoskeletal 2 epidermal                           |
| Q6IG01 | Keratin, type II cytoskeletal 1B                                    |
| Q9Z0V6 | Thioredoxin-dependent peroxide reductase mitochondrial              |
| Q3SWT0 | Platelet endothelial cell adhesion molecule (Pecam1)                |
| Q6IN10 | Endothelin-converting enzyme 1 Isoform                              |
| Q6IG05 | Keratin, type II cytoskeletal 75                                    |
| Q6IFW6 | Keratin, type I cytoskeletal 10                                     |

|        |                                                     |
|--------|-----------------------------------------------------|
| P09495 | Tropomyosin alpha-4                                 |
| Q5XIF6 | Tubulin alpha-4A                                    |
| D3ZWS0 | Protein scribble homolog                            |
| P62963 | Profilin-1                                          |
| Q66HD0 | Endoplasmin                                         |
| P62250 | 40S ribosomal protein S16                           |
| Q91Y81 | Septin-2                                            |
| P70550 | Ras-related protein Rab-8b                          |
| Q99P74 | Ras-related protein Rab-27b                         |
| Q99P75 | Ras-related protein Rab-9a                          |
| Q6IG12 | Keratin, type II cytoskeletal 7                     |
| P35704 | Peroxiredoxin-2                                     |
| Q2I6B2 | V-type proton ATPase subunit A1                     |
| G3V8G5 | Golgi apparatus protein 1                           |
| Q2I6B1 | V-type proton ATPase subunit A2                     |
| P62630 | Elongation factor 1-alpha 1                         |
| P62775 | Myotrophin                                          |
| Q6P6Q2 | Keratin, type II cytoskeletal 5                     |
| P62246 | 40S ribosomal protein S15a                          |
| D3ZNQ6 | NEDD8-conjugating enzyme Ubc12                      |
| P62832 | 60S ribosomal protein L23                           |
| P05712 | Ras-related protein Rab-2a                          |
| P62836 | Ras-related protein Rap-1a                          |
| E9PSV5 | Phosphoserine aminotransferase                      |
| P62243 | 40S ribosomal protein S8                            |
| Q01827 | Vesicular amine transporter 2                       |
| Q9JLT0 | Myosin heavy chain 10                               |
| P82995 | Heat shock protein HSP 90-alpha                     |
| P42667 | SEC11 homolog A                                     |
| G3V8F5 | Mitochondrial import receptor subunit TOM40 homolog |
| Q6IN37 | GM2 ganglioside activator                           |
| Q5XID0 | Protein YIPF5                                       |
| P80254 | D-dopachrome decarboxylase                          |
| P13383 | Nucleolin                                           |
| Q63610 | Tropomyosin alpha-3                                 |
| Q66X93 | Staphylococcal nuclease domain-containing protein 1 |
| Q6IFZ5 | Keratin, type II cytoskeletal 2 oral                |
| Q5VLR5 | Endoplasmic reticulum resident protein 44           |
| P62986 | Ubiquitin-60S ribosomal protein L40                 |

|        |                                                       |
|--------|-------------------------------------------------------|
| Q6RUV5 | Ras-related C3 botulinum toxin substrate 1 (Rac1)     |
| P62982 | Ubiquitin-40S ribosomal protein S27a                  |
| P82471 | Guanine nucleotide-binding protein G(q) subunit alpha |
| B4F7C2 | Tubulin beta-4A                                       |
| E9PT65 | Radixin                                               |
| Q9EPH8 | Polyadenylate-binding protein 1                       |
| Q6MG61 | Chloride intracellular channel protein 1              |
| P19944 | 60S acidic ribosomal protein P1                       |
| Q6TXF3 | Acyl-CoA-binding protein                              |
| P19945 | 60S acidic ribosomal protein P0                       |
| B2RZ27 | SH3 domain-binding glutamic acid-rich-like protein 3  |
| B2RYQ2 | Serine/threonine-protein phosphatase 2A activator     |
| P11240 | Cytochrome c oxidase subunit 5A mitochondrial         |
| E9PU37 | Palmitoyltransferase                                  |
| P11232 | Thioredoxin                                           |
| P05982 | NAD(P)H dehydrogenase [quinone] 1                     |
| P10252 | CD48 antigen                                          |
| P69897 | Tubulin beta-5                                        |
| P62890 | 60S ribosomal protein L30                             |
| P63095 | Guanine nucleotide-binding protein G(s) subunit alpha |
| P52296 | Importin subunit beta-1                               |
| D3ZTJ0 | Protein XRP2                                          |
| Q4QRB4 | Tubulin beta-3                                        |
| Q6P9V9 | Tubulin alpha-1B                                      |
| B2GUV5 | V-type proton ATPase subunit G 1                      |
| P18418 | Calreticulin                                          |
| Q6P9V1 | CD81 molecule                                         |
| Q63635 | Syntaxin-6                                            |
| P13221 | Aspartate aminotransferase cytoplasmic                |
| Q09073 | ADP/ATP translocase 2                                 |
| Q6AYA5 | Transmembrane protein 106 B                           |
| A7E3N2 | Neutrophil cytosol factor 2                           |
| P54921 | Alpha-soluble NSF attachment protein (SNAP-alpha)     |
| Q3KRD8 | Eukaryotic translation initiation factor 6            |
| P25113 | Phosphoglycerate mutase 1                             |
| G3V8C4 | Chloride intracellular channel protein 4              |
| P61983 | 14-3-3 protein gamma                                  |
| P49242 | 40S ribosomal protein S3a                             |
| B0BNA5 | Coactosin-like protein                                |

|        |                                                                         |
|--------|-------------------------------------------------------------------------|
| P02401 | 60S acidic ribosomal protein P2                                         |
| P50137 | Transketolase                                                           |
| P09527 | Ras-related protein Rab-7a                                              |
| P10888 | Cytochrome c oxidase subunit 4 isoform 1 mitochondrial                  |
| Q66HG5 | Transmembrane 9 superfamily member 2                                    |
| Q5U3Z7 | Serine hydroxymethyltransferase                                         |
| P48500 | Triosephosphate isomerase                                               |
| Q63524 | Transmembrane emp24 domain-containing protein 2                         |
| P23640 | Ras-related protein Rab-27a                                             |
| P62747 | Rho-related GTP-binding protein RhoB                                    |
| O70595 | ATP-binding cassette sub-family B member 6                              |
| B2GV92 | Prostaglandin E synthase 3                                              |
| Q4AEF8 | Coatomer subunit gamma 1                                                |
| P62083 | 40S ribosomal protein S7                                                |
| B2GV96 | Coiled-coil domain containing 115                                       |
| Q6IFU9 | keratin 16                                                              |
| Q6P9T8 | Tubulin beta-4B                                                         |
| Q6IFU8 | Keratin, type I cytoskeletal 17                                         |
| P04157 | Receptor-type tyrosine-protein phosphatase C (CD45)                     |
| Q6IFV3 | Keratin, type I cytoskeletal 15                                         |
| Q6IFV1 | Keratin, type I cytoskeletal 14                                         |
| P20070 | NADH-cytochrome b5 reductase 3                                          |
| Q5XIH7 | Prohibitin 2                                                            |
| G3V8A5 | Vacuolar protein sorting-associated protein 35                          |
| D3ZP98 | Minor histocompatibility antigen H13                                    |
| P11348 | Dihydropteridine reductase                                              |
| D4A465 | Ragulator complex protein LAMTOR2                                       |
| Q5I0G4 | Glycine--tRNA ligase                                                    |
| Q5U1Y2 | Ras-related C3 botulinum toxin substrate 2 (Rac2)                       |
| P85007 | Immediate early response 3-interacting protein 1                        |
| Q642A2 | Type-1 angiotensin II receptor-associated protein                       |
| Q6AZ61 | Probable lysosomal cobalamin transporter                                |
| Q00238 | Intercellular adhesion molecule 1 (ICAM1)                               |
| Q5M843 | 2-oxoglutarate and iron-dependent oxygenase domain-containing protein 3 |
| Q5EB77 | Ras-related protein Rab-18                                              |
| Q6AY18 | GTP-binding protein SAR1a                                               |
| D3ZIP8 | Endonuclease domain containing 1                                        |
| P19804 | Nucleoside diphosphate kinase B                                         |
| D4ADS9 | EFR3 homolog A                                                          |

|        |                                                         |
|--------|---------------------------------------------------------|
| B2GVB9 | Fermt3 protein                                          |
| B0BNG3 | Vesicular integral-membrane protein VIP36               |
| Q6AXT5 | Ras-related protein Rab-21                              |
| D4A376 | Ras-related protein Rab-12                              |
| Q6NYB7 | Ras-related protein Rab-1a                              |
| D3ZPR0 | Exportin-2                                              |
| P19511 | ATP synthase F(0) complex subunit B1 mitochondrial      |
| G3V8Z1 | Linker for activation of T-cells family member 2 (NTAL) |
| P19814 | Trans-Golgi network integral membrane protein TGN38     |
| Q76GL9 | Neutral amino acid transporter A                        |
| F1LNF0 | Myosin heavy chain 14                                   |
| P17074 | 40S ribosomal protein S19                               |
| Q5M7T6 | V-type proton ATPase subunit D 1                        |
| P63245 | Receptor of activated protein C kinase 1 (RACK1)        |
| Q8SEZ5 | Cytochrome c oxidase subunit 2                          |
| Q4KM73 | UMP-CMP kinase                                          |
| A1L134 | Ancient ubiquitous protein 1                            |
| Q4KM74 | Vesicle-trafficking protein SEC22b                      |
| P46462 | Transitional endoplasmic reticulum ATPase               |
| P35171 | Cytochrome c oxidase subunit 7A2                        |
| P04961 | Proliferating cell nuclear antigen                      |
| Q32PX6 | Rho-related GTP-binding protein RhoG                    |
| Q3KRC3 | Signal recognition particle receptor alpha              |
| Q6AXS5 | Plasminogen activator inhibitor 1 RNA-binding protein   |
| Q6AXS4 | Renin receptor                                          |
| P05426 | 60S ribosomal protein L7                                |
| D4A4T0 | STIP1 homology and U box-containing protein 1           |
| D4A0E2 | NSF attachment protein gamma                            |
| P16617 | Phosphoglycerate kinase 1                               |
| P45592 | Cofilin-1                                               |
| Q01621 | Tyrosine-protein kinase LCK                             |
| F1LZX9 | Integrin alpha 5                                        |
| F1MAS0 | keratin 32                                              |
| O35142 | Coatamer subunit beta 2                                 |
| Q9JJ19 | Na(+)/H(+) exchange regulatory cofactor NHE-RF1         |
| P08753 | Guanine nucleotide-binding protein G(k) subunit alpha   |
| D3ZPP2 | ADP-ribosylation factor-like protein 8A                 |
| P63269 | Actin gamma-enteric smooth muscle                       |
| P15429 | Beta-enolase                                            |

|        |                                                                   |
|--------|-------------------------------------------------------------------|
| Q63692 | Hsp90 co-chaperone Cdc37                                          |
| P97675 | Ectonucleotide pyrophosphatase/phosphodiesterase family member 3  |
| Q5XIA8 | Growth hormone-inducible transmembrane protein                    |
| D4A0G7 | Ras-related protein Rab-37                                        |
| Q5M7W6 | Protein FAM234A                                                   |
| D4A9L2 | Serine/arginine-rich splicing factor 1                            |
| P35289 | Ras-related protein Rab-15                                        |
| D3ZZR9 | Peptidylprolyl isomerase                                          |
| P63018 | Heat shock cognate 71 kDa protein                                 |
| P63012 | Ras-related protein Rab-3a                                        |
| P35565 | Calnexin                                                          |
| Q9R0C5 | Polypeptide N-acetylgalactosaminyltransferase 7                   |
| B0BNK1 | Ras-related protein Rab-5c                                        |
| P17046 | Lysosome-associated membrane glycoprotein 2 (Lamp2)               |
| O70521 | Regulator of G-protein signaling 19                               |
| F1LNC4 | Vesicle transport through interaction with t-SNAREs homolog 1B    |
| G3V6D3 | ATP synthase subunit beta                                         |
| D3ZDR2 | Charged multivesicular body protein 6                             |
| E9PTI1 | V-type proton ATPase subunit H                                    |
| P85108 | Tubulin beta-2A                                                   |
| D3ZZS8 | V-type proton ATPase subunit B, kidney isoform                    |
| P35435 | ATP synthase subunit gamma mitochondrial                          |
| D3ZGM7 | Peptidase inhibitor 16                                            |
| Q08163 | Adenylyl cyclase-associated protein 1                             |
| P26453 | Basigin                                                           |
| Q5RKJ9 | Ras-related protein Rab-10                                        |
| Q07647 | Solute carrier family 2, facilitated glucose transporter member 3 |
| Q5M860 | Rho GDP dissociation inhibitor 2                                  |
| Q8CGU6 | Nicastrin                                                         |
| P63039 | 60 kDa heat shock protein                                         |
| P14659 | Heat shock-related 70 kDa protein 2                               |
| Q6IRF8 | V-type proton ATPase subunit S1                                   |
| P00507 | Aspartate aminotransferase mitochondrial                          |
| Q3MHS9 | Chaperonin-containing TCP1 subunit 6A                             |
| M0RC99 | Ras-related protein Rab-5a                                        |
| Q9JK11 | Reticulon-4                                                       |
| P14562 | Lysosome-associated membrane glycoprotein 1 (Lamp1)               |
| Q6AXV4 | Sorting and assembly machinery component 50 homolog               |
| P14668 | Annexin A5                                                        |

|        |                                                       |
|--------|-------------------------------------------------------|
| P49432 | Pyruvate dehydrogenase component E1 beta              |
| Q4G075 | Leukocyte elastase inhibitor                          |
| Q9Z1E1 | Flotillin-1                                           |
| Q6IMF3 | Keratin, type II cytoskeletal 1                       |
| P63025 | VAMP3                                                 |
| Q920J4 | Thioredoxin-like protein 1                            |
| P24368 | Peptidyl-prolyl cis-trans isomerase B                 |
| Q499P3 | C1GALT1-specific chaperone 1                          |
| B0BNJ1 | Sorcin                                                |
| P19627 | Guanine nucleotide-binding protein G(z) subunit alpha |
| G3V9A3 | 14-3-3 protein sigma                                  |
| P23514 | Coatomer subunit beta 1                               |
| P35280 | Ras-related protein Rab-8a                            |

| ID Term            | GO Term              | Fold Enriched | Count                                                | <i>p</i> -value | FDR       |
|--------------------|----------------------|---------------|------------------------------------------------------|-----------------|-----------|
| GO:0031988         | EXTRACELLULAR REGION | 2.43          | 510                                                  | 4.04E-103       | 6.26E-100 |
| Annotated proteins |                      |               |                                                      |                 |           |
| Protein Accession  |                      |               | Protein Identification                               |                 |           |
| Q10473             |                      |               | Polypeptide N-acetylgalactosaminyltransferase 1      |                 |           |
| D3ZAF6             |                      |               | ATP synthase subunit F mitochondrial                 |                 |           |
| Q6P503             |                      |               | V-type proton ATPase subunit D                       |                 |           |
| B5DEH2             |                      |               | Erlin-2                                              |                 |           |
| F1M2P8             |                      |               | Protein kinase C alpha                               |                 |           |
| P21961             |                      |               | Mast cell carboxypeptidase A                         |                 |           |
| P50408             |                      |               | V-type proton ATPase subunit F                       |                 |           |
| Q63716             |                      |               | Peroxiredoxin-1                                      |                 |           |
| P26772             |                      |               | 10 kDa heat shock protein mitochondrial              |                 |           |
| Q5U204             |                      |               | Ragulator complex protein LAMTOR3                    |                 |           |
| P0DP29             |                      |               | Calmodulin-1                                         |                 |           |
| G3V852             |                      |               | Talin-1                                              |                 |           |
| D3ZTX0             |                      |               | Transmembrane emp24 domain-containing protein 7      |                 |           |
| P50503             |                      |               | Hsc70-interacting protein                            |                 |           |
| P06686             |                      |               | Sodium/potassium-transporting ATPase subunit alpha-2 |                 |           |
| P06687             |                      |               | Sodium/potassium-transporting ATPase subunit alpha-3 |                 |           |
| O08623             |                      |               | Sequestosome-1                                       |                 |           |
| P06685             |                      |               | Sodium/potassium-transporting ATPase subunit alpha-1 |                 |           |
| P07632             |                      |               | Superoxide dismutase [Cu-Zn]                         |                 |           |



|        |                                                                                   |
|--------|-----------------------------------------------------------------------------------|
| Q66H18 | Synaptophysin-like 1                                                              |
| G3V6H0 | Ras-related protein Rab-1b                                                        |
| P27139 | Carbonic anhydrase 2                                                              |
| Q7TP15 | S-methyl-5'-thioadenosine phosphorylase                                           |
| Q9ES40 | PRA1 family protein 3                                                             |
| P61589 | Transforming protein RhoA                                                         |
| G3V7U6 | Calpain 5                                                                         |
| P68511 | 14-3-3 protein eta                                                                |
| Q01205 | 2-oxoglutarate dehydrogenase complex component E2                                 |
| P67779 | Prohibitin                                                                        |
| Q5FVF4 | Transmembrane 7 superfamily member 3                                              |
| Q5BJY9 | Keratin, type I cytoskeletal 18                                                   |
| F1M5Z5 | Anoctamin-6                                                                       |
| D3ZRN3 | Beta-actin-like protein 2                                                         |
| O08651 | D-3-phosphoglycerate dehydrogenase                                                |
| O88989 | Malate dehydrogenase cytoplasmic                                                  |
| P11762 | Galectin-1                                                                        |
| P27615 | Lysosome membrane protein 2 (CD36)                                                |
| Q6AYK6 | Calcyclin-binding protein                                                         |
| P06761 | Endoplasmic reticulum chaperone BiP                                               |
| Q9QYV0 | Disintegrin and metalloproteinase domain-containing protein 15                    |
| P63102 | 14-3-3 protein zeta/delta                                                         |
| B0K020 | CDGSH iron-sulfur domain-containing protein 1                                     |
| Q9EST6 | Acidic leucine-rich nuclear phosphoprotein 32 family member B                     |
| Q78P65 | Rap2A-like protein                                                                |
| P07943 | Aldose reductase                                                                  |
| P32089 | Citrate transport protein                                                         |
| M0RCF3 | Integrin beta 3                                                                   |
| Q5XI34 | Serine/threonine-protein phosphatase 2A 65 kDa regulatory subunit A alpha isoform |
| Q5XI32 | F-actin-capping protein subunit beta                                              |
| P83732 | 60S ribosomal protein L24                                                         |
| Q5XIV1 | Phosphoglycerate kinase 2                                                         |
| Q62611 | Interleukin 1 receptor-like 1                                                     |
| P52555 | Endoplasmic reticulum resident protein 29                                         |
| O88994 | Mitochondrial amidoxime reducing component 2                                      |
| Q5XI38 | Lymphocyte cytosolic protein 1                                                    |
| P04764 | Alpha-enolase                                                                     |
| Q5XI36 | CD97                                                                              |
| B0K010 | Thioredoxin domain-containing 17                                                  |

|        |                                                                         |
|--------|-------------------------------------------------------------------------|
| Q10758 | Keratin, type II cytoskeletal 8                                         |
| P06765 | Platelet factor 4                                                       |
| Q07936 | Annexin A2                                                              |
| P05197 | Elongation factor 2                                                     |
| Q9R1Z0 | Voltage-dependent anion-selective channel protein 3                     |
| P85968 | 6-phosphogluconate dehydrogenase decarboxylating                        |
| P63322 | Ras-related protein Ral-A                                               |
| Q63396 | Activated RNA polymerase II transcriptional coactivator p15             |
| P54313 | Transducin beta-2                                                       |
| Q6AYQ9 | Peptidyl-prolyl cis-trans isomerase C                                   |
| F1MA89 | Cyclin Y                                                                |
| P54311 | Transducin beta-1                                                       |
| Q6PDU1 | Serine/arginine-rich splicing factor 2                                  |
| Q6AYQ4 | Transmembrane protein 109                                               |
| O70257 | Syntaxin-7                                                              |
| O88767 | Protein/nucleic acid deglycase DJ-1                                     |
| D4AEP0 | Adenylosuccinate synthetase isozyme 2                                   |
| P51577 | P2X purinoceptor 4                                                      |
| D3ZUX5 | MICOS complex subunit MIC-19                                            |
| P35213 | 14-3-3 protein beta/alpha                                               |
| P34058 | Heat shock protein HSP 90-beta                                          |
| Q9EQX9 | Ubiquitin-conjugating enzyme E2 N                                       |
| G3V7P1 | Syntaxin-12                                                             |
| P15865 | Histone H1.4                                                            |
| Q920P6 | Adenosine deaminase                                                     |
| Q91ZN1 | Coronin-1A                                                              |
| P04785 | Protein disulfide-isomerase                                             |
| G3V9Y2 | Phospholipid phosphatase 1                                              |
| G3V7Q7 | Ras GTPase-activating-like protein IQGAP1                               |
| Q63016 | Large neutral amino acids transporter small subunit 1                   |
| Q5EAP4 | Guanine nucleotide binding protein alpha-14                             |
| R9PXR4 | Mitochondrial import receptor subunit TOM70                             |
| P63331 | Serine/threonine-protein phosphatase 2A catalytic subunit alpha isoform |
| Q63116 | Mast/stem cell growth factor receptor                                   |
| P85971 | 6-phosphogluconolactonase                                               |
| D3ZSY5 | keratin 84                                                              |
| Q64244 | ADP-ribosyl cyclase/cyclic ADP-ribose hydrolase 1                       |
| P21531 | 60S ribosomal protein L3                                                |
| P81155 | Voltage-dependent anion-selective channel protein 2                     |

|        |                                                                        |
|--------|------------------------------------------------------------------------|
| G3V964 | Neurotrimin                                                            |
| P31000 | Vimentin                                                               |
| P12368 | cAMP-dependent protein kinase type II-alpha regulatory subunit         |
| F7EPH4 | Inorganic Pyrophosphatase                                              |
| Q5I0E7 | Transmembrane emp24 domain-containing protein 9                        |
| A1L1J8 | Ras-related protein Rab-5b                                             |
| P38983 | 40S ribosomal protein SA                                               |
| B0K031 | 60S ribosomal protein L7, isoform                                      |
| F1LN88 | Aldehyde dehydrogenase                                                 |
| F7FFV2 | keratin 5                                                              |
| Q05982 | Nucleoside diphosphate kinase A                                        |
| P21708 | Mitogen-activated protein kinase 3                                     |
| P04797 | Glyceraldehyde-3-phosphate dehydrogenase                               |
| O35567 | Bifunctional purine biosynthesis protein PURH                          |
| P04897 | Guanine nucleotide-binding protein G(i) subunit alpha-2                |
| Q8VHF5 | Citrate synthase mitochondrial                                         |
| G3V936 | Citrate synthase                                                       |
| Q08849 | Syntaxin-3                                                             |
| Q8CFN2 | Cell division control protein 42 homolog (CDC42)                       |
| Q9EPV5 | Apoptotic protease-activating factor 1                                 |
| Q5I0D1 | Glyoxalase domain-containing protein 4                                 |
| Q53B90 | Ras-related protein Rab-43                                             |
| P58195 | Phospholipid scramblase 1                                              |
| Q9JHW5 | VAMP7                                                                  |
| Q9JI85 | Nucleobindin-2                                                         |
| P01830 | Thy-1 membrane glycoprotein                                            |
| O70377 | Synaptosomal-associated protein 23 (SNAP-23)                           |
| Q68FP1 | Gelsolin                                                               |
| D4A133 | V-type proton ATPase catalytic subunit A                               |
| P21913 | Succinate dehydrogenase [ubiquinone] iron-sulfur subunit mitochondrial |
| Q07014 | Tyrosine-protein kinase Lyn                                            |
| D3ZK56 | Ras-related protein Rap-2c                                             |
| Q07984 | Translocon-associated protein subunit delta                            |
| Q5XI77 | Annexin A11                                                            |
| P31977 | Ezrin                                                                  |
| Q5XI73 | Rho GDP dissociation inhibitor 1                                       |
| P07151 | Beta-2-microglobulin                                                   |
| P00762 | Anionic trypsin-1                                                      |
| P15999 | ATP synthase subunit alpha mitochondrial                               |

|        |                                                      |
|--------|------------------------------------------------------|
| P07150 | Annexin A1                                           |
| Q6AYQ1 | Golgin subfamily A member 7                          |
| P60711 | Actin cytoplasmic 1                                  |
| O35353 | Transducin beta-4                                    |
| B2RYB8 | Integrin beta 2                                      |
| F1LW77 | Ras-related protein Rab-33b                          |
| Q9Z2S9 | Flotillin-2                                          |
| Q5U362 | Annexin A4                                           |
| Q68FR6 | Elongation factor 1-gamma                            |
| Q9Z2L0 | Voltage-dependent anion-selective channel protein 1  |
| B2RYC9 | Glucosylceramidase                                   |
| P51635 | Alcohol dehydrogenase [NADP(+)]                      |
| E9PTU4 | Myosin heavy chain 11                                |
| F1LM82 | Heterogeneous nuclear ribonucleoproteins A2/B1       |
| P11442 | Clathrin heavy chain 1                               |
| B0BN81 | Ribosomal protein S5                                 |
| P12075 | Cytochrome c oxidase subunit 5B mitochondrial        |
| Q05030 | Platelet-derived growth factor receptor beta         |
| G3V7L8 | V-type proton ATPase subunit E 1 isoform             |
| Q62662 | Tyrosine-protein kinase FRK                          |
| P61107 | Ras-related protein Rab-14                           |
| F1LPV0 | Asparagine--tRNA ligase, cytoplasmic                 |
| P61972 | Nuclear transport factor 2                           |
| Q6PCU2 | V-type proton ATPase subunit E 1                     |
| Q5PQL7 | Integral membrane protein 2C                         |
| M0R9L0 | Nascent polypeptide-associated complex subunit alpha |
| P49134 | Integrin beta 1                                      |
| P50475 | Alanine--tRNA ligase cytoplasmic                     |
| G3V712 | keratin 7                                            |
| Q68FQ0 | T-complex protein 1 epsilon                          |
| Q810F4 | Protein FAM3C                                        |
| P31044 | Phosphatidylethanolamine-binding protein 1           |
| Q4QQV0 | Tubulin beta-6                                       |
| F1LQ81 | Vesicle-fusing ATPase                                |
| Q3B7V5 | Ras-related protein Rab-2b                           |
| D4A0T0 | NADH dehydrogenase 1 beta subcomplex subunit 10      |
| G3V7M2 | Integrin beta 7                                      |
| G3V6P8 | Guanine nucleotide-binding protein gamma-12          |
| G3V6P7 | Myosin heavy chain 9                                 |

|        |                                                                            |
|--------|----------------------------------------------------------------------------|
| Q04970 | GTPase NRas                                                                |
| D3ZNG3 | Signal peptide peptidase-like 2A                                           |
| Q9Z1J7 | Amino acid transporter                                                     |
| E9PTW1 | Secretory carrier-associated membrane protein                              |
| R9PXU4 | Thioredoxin reductase 1 cytoplasmic                                        |
| D4ADE8 | ATP-dependent RNA helicase DDX3X                                           |
| O88600 | Heat shock 70 kDa protein 4                                                |
| G3V9N9 | alpha-1,2-Mannosidase                                                      |
| Q794F9 | 4F2 cell-surface antigen heavy chain                                       |
| Q6P791 | Ragulator complex protein LAMTOR1                                          |
| F1LNT8 | VAMP8                                                                      |
| P61227 | Ras-related protein Rap-2b                                                 |
| Q6P799 | Serine--tRNA ligase cytoplasmic                                            |
| P62703 | 40S ribosomal protein S4, X isoform                                        |
| P62909 | 40S ribosomal protein S3                                                   |
| O35796 | Complement component 1 Q subcomponent-binding protein mitochondrial        |
| Q6AYC4 | Macrophage-capping protein                                                 |
| Q63377 | Sodium/potassium-transporting ATPase subunit beta-3                        |
| P62907 | 60S ribosomal protein L10a                                                 |
| M0RBJ0 | Guanine nucleotide-binding protein gamma-2                                 |
| Q63942 | Ras-related protein Rab-3d                                                 |
| P48721 | Mortalin                                                                   |
| Q63584 | Transmembrane emp24 domain-containing protein 10                           |
| P10960 | Prosaposin                                                                 |
| Q6EV76 | Alpha-(1,6)-fucosyltransferase                                             |
| Q5XIM9 | T-complex protein 1 beta                                                   |
| F1M779 | Clathrin heavy chain                                                       |
| P05065 | Fructose-bisphosphate aldolase A                                           |
| P32551 | Cytochrome b-c1 complex subunit 2 mitochondrial                            |
| B0BN52 | Mitochondrial carrier homolog 2                                            |
| E9PTX9 | Solute carrier family 12 member 2                                          |
| Q5XFX0 | Transgelin-2                                                               |
| F1LRK1 | Sodium/potassium-transporting ATPase subunit alpha                         |
| Q7TSA0 | Mitochondrial Rho GTPase 2                                                 |
| P61805 | Dolichyl-diphosphooligosaccharide protein glycosyltransferase subunit DAD1 |
| G3V908 | keratin, type II Kb15                                                      |
| P53987 | Monocarboxylate transporter 1                                              |
| P09811 | Glycogen phosphorylase liver form                                          |
| G3V6N2 | Transmembrane emp24 domain-containing protein 4                            |

|        |                                                                   |
|--------|-------------------------------------------------------------------|
| Q62902 | Lectin mannose-binding 1                                          |
| P28494 | Alpha-mannosidase 2                                               |
| P61131 | Beta-galactoside alpha-2,3-sialyltransferase 4                    |
| Q6PDV6 | 40S ribosomal protein S14                                         |
| P50399 | Rab GDP dissociation inhibitor beta                               |
| Q6AYD3 | Proliferation-associated protein 2G4                              |
| Q9WVB1 | Ras-related protein Rab-6a                                        |
| Q05175 | Brain acid soluble protein 1                                      |
| B2RYG6 | Ubiquitin thioesterase OTUB1                                      |
| P62278 | 40S ribosomal protein S13                                         |
| Q3T1K5 | F-actin-capping protein subunit alpha-2                           |
| P62138 | Serine/threonine-protein phosphatase PP1-alpha catalytic subunit  |
| P68370 | Tubulin alpha-1A                                                  |
| Q5U316 | Ras-related protein Rab-35                                        |
| P11167 | Solute carrier family 2, facilitated glucose transporter member 1 |
| P31399 | ATP synthase subunit D mitochondrial                              |
| D4A720 | Serine/arginine-rich splicing factor 7 isoform 2                  |
| G3V8L7 | Integrin alpha M                                                  |
| P04642 | L-lactate dehydrogenase A chain                                   |
| O35509 | Ras-related protein Rab-11b                                       |
| P62828 | GTP-binding nuclear protein Ran                                   |
| P70583 | Deoxyuridine 5'-triphosphate nucleotidohydrolase                  |
| Q6AYI1 | Probable ATP-dependent RNA helicase DDX5                          |
| P70580 | Membrane-associated progesterone receptor component 1             |
| P23358 | 60S ribosomal protein L12                                         |
| Q3T1J1 | Eukaryotic translation initiation factor 5A-1                     |
| F7EWC1 | Vasodilator-stimulated phosphoprotein                             |
| Q66HA6 | ADP-ribosylation factor-like protein 8B                           |
| P11598 | Protein disulfide-isomerase A3                                    |
| P62282 | 40S ribosomal protein S11                                         |
| Q6P3V9 | 60S ribosomal protein L4                                          |
| G3V6T1 | Coatamer subunit alpha                                            |
| Q6P3V8 | Eukaryotic initiation factor 4A-I                                 |
| Q66HA4 | Tax1-binding protein 1 homolog                                    |
| F1LP82 | Ras-related protein Rab-2a                                        |
| Q62636 | Ras-related protein Rap-1b                                        |
| Q3MIE4 | Synaptic vesicle membrane protein VAT-1 homolog                   |
| Q6P742 | Proteolipid protein 2                                             |
| P04636 | Malate dehydrogenase mitochondrial                                |

|        |                                                                     |
|--------|---------------------------------------------------------------------|
| P62914 | 60S ribosomal protein L11                                           |
| P50339 | Chymase 1                                                           |
| Q5U300 | Ubiquitin-like modifier-activating enzyme 1                         |
| G3V7I0 | Peroxiredoxin-3                                                     |
| P62815 | V-type proton ATPase subunit B                                      |
| Q9JID2 | Guanine nucleotide-binding protein alpha-11                         |
| Q63198 | Contactin 1                                                         |
| P11980 | Pyruvate kinase PKM                                                 |
| Q9Z2J5 | VAMP5                                                               |
| P10719 | ATP synthase subunit beta mitochondrial                             |
| D3ZAY7 | Band 4.1-like protein 2                                             |
| G3V741 | Solute carrier family 25 member 3                                   |
| O88941 | Mannosyl-oligosaccharide glucosidase                                |
| O54980 | Synaptogyrin-2                                                      |
| Q6P6T6 | Cathepsin D                                                         |
| Q4V7D9 | Acid sphingomyelinase-like phosphodiesterase 3B                     |
| Q6S395 | Plectin                                                             |
| F1LMP7 | Granulins                                                           |
| Q5XI04 | Erythrocyte band 7 integral membrane protein                        |
| F1LQJ7 | Phosphoenolpyruvate carboxykinase [GTP], mitochondrial              |
| Q9R1T1 | Barrier-to-autointegration factor                                   |
| P22734 | Catechol O-methyltransferase                                        |
| P62804 | Histone H4                                                          |
| F1LM93 | Tyrosine-protein kinase Yes                                         |
| Q63083 | Nucleobindin-1                                                      |
| Q9JKB7 | Guanine deaminase                                                   |
| P12928 | Pyruvate kinase PKLR                                                |
| Q63081 | Protein disulfide-isomerase A6                                      |
| G3V9S3 | Tyrosine-protein phosphatase non-receptor type 13                   |
| P13832 | Myosin regulatory light chain RLC-A                                 |
| B1WBV5 | DnaJ homolog subfamily C member 11                                  |
| Q62940 | E3 ubiquitin-protein ligase NEDD4                                   |
| Q62658 | Peptidyl-prolyl cis-trans isomerase FKBP1A                          |
| P68255 | 14-3-3 protein theta                                                |
| Q63803 | Guanine nucleotide-binding protein G(s) subunit alpha isoforms XLas |
| Q6P6U0 | Tyrosine-protein kinase Fgr                                         |
| Q62753 | Syntaxin-binding protein 2                                          |
| D4A5K6 | Zinc metallopeptidase STE24                                         |
| P13838 | Leukosialin                                                         |

|        |                                                        |
|--------|--------------------------------------------------------|
| Q06647 | ATP synthase subunit O mitochondrial                   |
| G3V637 | Syntaxin-binding protein 2, isoform                    |
| P62859 | 40S ribosomal protein S28                              |
| Q6IN24 | Galectin-8                                             |
| G3V8I4 | Syntaxin-4A                                            |
| Q6IFV6 | Keratin 35                                             |
| P09895 | 60S ribosomal protein L5                               |
| Q63507 | 60S ribosomal protein L14                              |
| P10111 | Peptidyl-prolyl cis-trans isomerase A                  |
| G3V679 | Transferrin receptor protein 1                         |
| P62260 | 14-3-3 protein epsilon                                 |
| Q5XIE8 | Integral membrane protein 2B                           |
| B2GUZ9 | Fam49b protein                                         |
| Q6IG03 | Keratin, type II cytoskeletal 73                       |
| Q6IG02 | Keratin, type II cytoskeletal 2 epidermal              |
| Q6IG01 | Keratin, type II cytoskeletal 1B                       |
| Q9Z0V6 | Thioredoxin-dependent peroxide reductase mitochondrial |
| Q3SWT0 | Platelet endothelial cell adhesion molecule (Pecam1)   |
| Q6IN10 | Endothelin-converting enzyme 1 Isoform                 |
| Q6IG05 | Keratin, type II cytoskeletal 75                       |
| Q6IFW6 | Keratin, type I cytoskeletal 10                        |
| P09495 | Tropomyosin alpha-4                                    |
| Q5XIF6 | Tubulin alpha-4A                                       |
| D3ZWS0 | Protein scribble homolog                               |
| P62963 | Profilin-1                                             |
| Q66HD0 | Endoplasmin                                            |
| P62250 | 40S ribosomal protein S16                              |
| Q91Y81 | Septin-2                                               |
| P70550 | Ras-related protein Rab-8b                             |
| Q99P74 | Ras-related protein Rab-27b                            |
| Q99P75 | Ras-related protein Rab-9a                             |
| Q6IG12 | Keratin, type II cytoskeletal 7                        |
| Q2IBC7 | Hepatocyte growth factor receptor                      |
| P35704 | Peroxisomal protein 2                                  |
| Q2I6B2 | V-type proton ATPase subunit A1                        |
| G3V8G5 | Golgi apparatus protein 1                              |
| P62630 | Elongation factor 1-alpha 1                            |
| P62775 | Myotrophin                                             |
| F1LMM5 | Arachidonate 5-lipoxygenase                            |



|        |                                                       |
|--------|-------------------------------------------------------|
| Q6P6Q2 | Keratin, type II cytoskeletal 5                       |
| P62246 | 40S ribosomal protein S15a                            |
| D3ZNQ6 | NEDD8-conjugating enzyme Ubc12                        |
| P62832 | 60S ribosomal protein L23                             |
| P05712 | Ras-related protein Rab-2a                            |
| P62836 | Ras-related protein Rap-1a                            |
| P62243 | 40S ribosomal protein S8                              |
| E9PSV5 | Phosphoserine aminotransferase                        |
| Q9JLT0 | Myosin heavy chain 10                                 |
| P82995 | Heat shock protein HSP 90-alpha                       |
| P42667 | SEC11 homolog A                                       |
| G3V8F5 | Mitochondrial import receptor subunit TOM40 homolog   |
| Q6IN37 | GM2 ganglioside activator                             |
| P80254 | D-dopachrome decarboxylase                            |
| P13383 | Nucleolin                                             |
| G3V667 | Integrin alpha 6                                      |
| Q63610 | Tropomyosin alpha-3                                   |
| Q66X93 | Staphylococcal nuclease domain-containing protein 1   |
| Q6IFZ5 | Keratin, type II cytoskeletal 2 oral                  |
| Q5VLR5 | Endoplasmic reticulum resident protein 44             |
| P62986 | Ubiquitin-60S ribosomal protein L40                   |
| Q6RUV5 | Ras-related C3 botulinum toxin substrate 1 (Rac1)     |
| P62982 | Ubiquitin-40S ribosomal protein S27a                  |
| P82471 | Guanine nucleotide-binding protein G(q) subunit alpha |
| B4F7C2 | Tubulin beta-4A                                       |
| E9PT65 | Radixin                                               |
| Q9EPH8 | Polyadenylate-binding protein 1                       |
| Q6MG61 | Chloride intracellular channel protein 1              |
| P19944 | 60S acidic ribosomal protein P1                       |
| Q6TXF3 | Acyl-CoA-binding protein                              |
| P19945 | 60S acidic ribosomal protein P0                       |
| B2RZ27 | SH3 domain-binding glutamic acid-rich-like protein 3  |
| B2RYQ2 | Serine/threonine-protein phosphatase 2A activator     |
| P11240 | Cytochrome c oxidase subunit 5A mitochondrial         |
| P11232 | Thioredoxin                                           |
| P05982 | NAD(P)H dehydrogenase [quinone] 1                     |
| P10252 | CD48 antigen                                          |
| P69897 | Tubulin beta-5                                        |
| P62890 | 60S ribosomal protein L30                             |

|        |                                                        |
|--------|--------------------------------------------------------|
| P63095 | Guanine nucleotide-binding protein G(s) subunit alpha  |
| P52296 | Importin subunit beta-1                                |
| D3ZTJ0 | Protein XRP2                                           |
| Q4QRB4 | Tubulin beta-3                                         |
| Q6P9V9 | Tubulin alpha-1B                                       |
| B2GUV5 | V-type proton ATPase subunit G 1                       |
| B2GV72 | Carbonyl reductase 3                                   |
| P18418 | Calreticulin                                           |
| Q6P9V1 | CD81 molecule                                          |
| P13221 | Aspartate aminotransferase cytoplasmic                 |
| Q09073 | ADP/ATP translocase 2                                  |
| Q6AYA5 | Transmembrane protein 106 B                            |
| P54921 | Alpha-soluble NSF attachment protein (SNAP-alpha)      |
| P25113 | Phosphoglycerate mutase 1                              |
| Q3KRD8 | Eukaryotic translation initiation factor 6             |
| P09626 | Potassium-transporting ATPase alpha chain 1            |
| G3V8C4 | Chloride intracellular channel protein 4               |
| P61983 | 14-3-3 protein gamma                                   |
| P49242 | 40S ribosomal protein S3a                              |
| BOBNA5 | Coactosin-like protein                                 |
| P02401 | 60S acidic ribosomal protein P2                        |
| P50137 | Transketolase                                          |
| P09527 | Ras-related protein Rab-7a                             |
| P10888 | Cytochrome c oxidase subunit 4 isoform 1 mitochondrial |
| Q66HG5 | Transmembrane 9 superfamily member 2                   |
| Q5U3Z7 | Serine hydroxymethyltransferase                        |
| P48500 | Triosephosphate isomerase                              |
| P23640 | Ras-related protein Rab-27a                            |
| P62747 | Rho-related GTP-binding protein RhoB                   |
| O70595 | ATP-binding cassette sub-family B member 6             |
| B2GV92 | Prostaglandin E synthase 3                             |
| M0RAU0 | Advanced glycosylation end product-specific receptor   |
| P62083 | 40S ribosomal protein S7                               |
| Q6IFU9 | keratin 16                                             |
| Q6P9T8 | Tubulin beta-4B                                        |
| Q6IFU8 | Keratin, type I cytoskeletal 17                        |
| P04157 | Receptor-type tyrosine-protein phosphatase C (CD45)    |
| G3V7A5 | Low density lipoprotein receptor isoform               |
| Q6IFV3 | Keratin, type I cytoskeletal 15                        |

|        |                                                                         |
|--------|-------------------------------------------------------------------------|
| Q6IFV1 | Keratin, type I cytoskeletal 14                                         |
| P20070 | NADH-cytochrome b5 reductase 3                                          |
| Q5XIH7 | Prohibitin 2                                                            |
| G3V8A5 | Vacuolar protein sorting-associated protein 35                          |
| P11348 | Dihydropteridine reductase                                              |
| D4A465 | Ragulator complex protein LAMTOR2                                       |
| Q5I0G4 | Glycine--tRNA ligase                                                    |
| Q5U1Y2 | Ras-related C3 botulinum toxin substrate 2 (Rac2)                       |
| P85007 | Immediate early response 3-interacting protein 1                        |
| Q00238 | Intercellular adhesion molecule 1 (ICAM1)                               |
| Q5M843 | 2-oxoglutarate and iron-dependent oxygenase domain-containing protein 3 |
| Q5EB77 | Ras-related protein Rab-18                                              |
| Q6AY18 | GTP-binding protein SAR1a                                               |
| D3ZIP8 | Endonuclease domain containing 1                                        |
| P19804 | Nucleoside diphosphate kinase B                                         |
| D4ADS9 | EFR3 homolog A                                                          |
| B2GVB9 | Fermt3 protein                                                          |
| B0BNG3 | Vesicular integral-membrane protein VIP36                               |
| Q6AXT5 | Ras-related protein Rab-21                                              |
| Q6NYB7 | Ras-related protein Rab-1a                                              |
| D3ZPR0 | Exportin-2                                                              |
| P19511 | ATP synthase F(0) complex subunit B1 mitochondrial                      |
| G3V8Z1 | Linker for activation of T-cells family member 2 (NTAL)                 |
| Q76GL9 | Neutral amino acid transporter A                                        |
| F1LNF0 | Myosin heavy chain 14                                                   |
| P17074 | 40S ribosomal protein S19                                               |
| Q5M7T6 | V-type proton ATPase subunit D 1                                        |
| P63245 | Receptor of activated protein C kinase 1 (RACK1)                        |
| Q8SEZ5 | Cytochrome c oxidase subunit 2                                          |
| Q4KM73 | UMP-CMP kinase                                                          |
| A1L134 | Ancient ubiquitous protein 1                                            |
| P46462 | Transitional endoplasmic reticulum ATPase                               |
| P35171 | Cytochrome c oxidase subunit 7A2                                        |
| P04961 | Proliferating cell nuclear antigen                                      |
| Q32PX6 | Rho-related GTP-binding protein RhoG                                    |
| Q3KRC3 | Signal recognition particle receptor alpha                              |
| Q6AXS5 | Plasminogen activator inhibitor 1 RNA-binding protein                   |
| Q6AXS4 | Renin receptor                                                          |
| P05426 | 60S ribosomal protein L7                                                |

|        |                                                                  |
|--------|------------------------------------------------------------------|
| D4A4T0 | STIP1 homology and U box-containing protein 1                    |
| D4A0E2 | NSF attachment protein gamma                                     |
| P16617 | Phosphoglycerate kinase 1                                        |
| P45592 | Cofilin-1                                                        |
| Q01621 | Tyrosine-protein kinase LCK                                      |
| F1LZX9 | Integrin alpha 5                                                 |
| F1MAS0 | keratin 32                                                       |
| Q9JJ19 | Na(+)/H(+) exchange regulatory cofactor NHE-RF1                  |
| P08753 | Guanine nucleotide-binding protein G(k) subunit alpha            |
| D3ZPP2 | ADP-ribosylation factor-like protein 8A                          |
| P63269 | Actin gamma-enteric smooth muscle                                |
| P15429 | Beta-enolase                                                     |
| Q63692 | Hsp90 co-chaperone Cdc37                                         |
| P97675 | Ectonucleotide pyrophosphatase/phosphodiesterase family member 3 |
| Q5XIA8 | Growth hormone-inducible transmembrane protein                   |
| POC5H9 | Mesencephalic astrocyte-derived neurotrophic factor              |
| Q5M7W6 | Protein FAM234A                                                  |
| D4A9L2 | Serine/arginine-rich splicing factor 1                           |
| P35289 | Ras-related protein Rab-15                                       |
| Q4FZX7 | Signal recognition particle receptor beta                        |
| D3ZZR9 | Peptidylprolyl isomerase                                         |
| P63018 | Heat shock cognate 71 kDa protein                                |
| P63012 | Ras-related protein Rab-3a                                       |
| P35565 | Calnexin                                                         |
| Q9R0C5 | Polypeptide N-acetylgalactosaminyltransferase 7                  |
| B0BNK1 | Ras-related protein Rab-5c                                       |
| P17046 | Lysosome-associated membrane glycoprotein 2 (Lamp2)              |
| G3V6D3 | ATP synthase subunit beta                                        |
| D3ZDR2 | Charged multivesicular body protein 6                            |
| E9PTI1 | V-type proton ATPase subunit H                                   |
| P85108 | Tubulin beta-2A                                                  |
| D3ZZS8 | V-type proton ATPase subunit B, kidney isoform                   |
| P35435 | ATP synthase subunit gamma mitochondrial                         |
| D3ZGM7 | Peptidase inhibitor 16                                           |
| Q08163 | Adenylyl cyclase-associated protein 1                            |
| P26453 | Basigin                                                          |
| Q5RKJ9 | Ras-related protein Rab-10                                       |
| Q5M860 | Rho GDP dissociation inhibitor 2                                 |
| Q8CGU6 | Nicastrin                                                        |

|        |                                                       |
|--------|-------------------------------------------------------|
| P63039 | 60 kDa heat shock protein                             |
| P14659 | Heat shock-related 70 kDa protein 2                   |
| Q6IRF8 | V-type proton ATPase subunit S1                       |
| P00507 | Aspartate aminotransferase mitochondrial              |
| Q3MHS9 | Chaperonin-containing TCP1 subunit 6A                 |
| M0RC99 | Ras-related protein Rab-5a                            |
| P35952 | Low-density lipoprotein receptor                      |
| Q9JK11 | Reticulon-4                                           |
| P14562 | Lysosome-associated membrane glycoprotein 1 (Lamp1)   |
| Q6AXV4 | Sorting and assembly machinery component 50 homolog   |
| P14668 | Annexin A5                                            |
| P49432 | Pyruvate dehydrogenase component E1 beta              |
| D3ZP13 | Sulfhydryl oxidase 2                                  |
| Q4G075 | Leukocyte elastase inhibitor                          |
| Q9Z1E1 | Flotillin-1                                           |
| Q6IMF3 | Keratin, type II cytoskeletal 1                       |
| Q920J4 | Thioredoxin-like protein 1                            |
| P24368 | Peptidyl-prolyl cis-trans isomerase B                 |
| Q499P3 | C1GALT1-specific chaperone 1                          |
| B0BNJ1 | Sorcin                                                |
| P19627 | Guanine nucleotide-binding protein G(z) subunit alpha |
| G3V9A3 | 14-3-3 protein sigma                                  |
| P35280 | Ras-related protein Rab-8a                            |

### Annotation Cluster Enrichment Score: 26.01

| ID Term            | GO Term                               | Fold Enriched | Count                                           | <i>p</i> -value | FDR      |
|--------------------|---------------------------------------|---------------|-------------------------------------------------|-----------------|----------|
| GO:0045184         | ESTABLISHMENT OF PROTEIN LOCALIZATION | 2.41          | 221                                             | 2.22E-36        | 4.35E-33 |
| Annotated proteins |                                       |               |                                                 |                 |          |
| Protein Accession  |                                       |               | Protein Identification                          |                 |          |
| Q5BK85             |                                       |               | Transmembrane emp24 domain-containing protein 1 |                 |          |
| F1M2P8             |                                       |               | Protein kinase C alpha                          |                 |          |
| Q62876             |                                       |               | Synaptogyrin-1                                  |                 |          |
| Q62726             |                                       |               | Serine/threonine-protein kinase ICK             |                 |          |
| Q5XIU4             |                                       |               | B-cell receptor-associated protein 29           |                 |          |
| Q63716             |                                       |               | Peroxiredoxin-1                                 |                 |          |
| G3V8I4             |                                       |               | Syntaxin-4A                                     |                 |          |

|        |                                                               |
|--------|---------------------------------------------------------------|
| F1LMK0 | A-kinase anchoring protein 1 isoform 2                        |
| B0BN02 | Metaxin 1                                                     |
| P10111 | Peptidyl-prolyl cis-trans isomerase A                         |
| D3ZTX0 | Transmembrane emp24 domain-containing protein 7               |
| G3V679 | Transferrin receptor protein 1                                |
| P29995 | Inositol 1,4,5-trisphosphate receptor type 2                  |
| P62260 | 14-3-3 protein epsilon                                        |
| G3V6H0 | Ras-related protein Rab-1b                                    |
| P20417 | Protein-tyrosine phosphatase 1B                               |
| P68511 | 14-3-3 protein eta                                            |
| Q66HD0 | Endoplasmin                                                   |
| P70550 | Ras-related protein Rab-8b                                    |
| Q5BJY9 | Keratin, type I cytoskeletal 18                               |
| Q62991 | Syntaxin-binding protein 1-like 2                             |
| Q99P75 | Ras-related protein Rab-9a                                    |
| Q62896 | Bet1 golgi vesicular membrane trafficking protein             |
| O88884 | A-kinase anchor protein 1, mitochondrial                      |
| Q5XI41 | Translocating chain-associated membrane protein 1             |
| P27615 | Lysosome membrane protein 2 (CD36)                            |
| G3V8G5 | Golgi apparatus protein 1                                     |
| P63102 | 14-3-3 protein zeta/delta                                     |
| Q9EST6 | Acidic leucine-rich nuclear phosphoprotein 32 family member B |
| Q78P65 | Rap2A-like protein                                            |
| D3ZUZ4 | Glycosaminoglycan xylosylkinase                               |
| P05712 | Ras-related protein Rab-2a                                    |
| P62836 | Ras-related protein Rap-1a                                    |
| Q01827 | Vesicular amine transporter 2                                 |
| P97887 | Presenilin-1                                                  |
| P36370 | Antigen peptide transporter 1                                 |
| P82995 | Heat shock protein HSP 90-alpha                               |
| P52555 | Endoplasmic reticulum resident protein 29                     |
| Q62611 | Interleukin 1 receptor-like 1                                 |
| G3V8F5 | Mitochondrial import receptor subunit TOM40 homolog           |
| Q5XI38 | Lymphocyte cytosolic protein 1                                |
| Q5XID0 | Protein YIPF5                                                 |
| Q5RKH6 | Protein OS-9                                                  |
| P13383 | Nucleolin                                                     |
| P05708 | Hexokinase-1                                                  |
| P13386 | High affinity immunoglobulin epsilon receptor subunit beta    |
| M0RDI5 | Mitochondrial calcium uniporter                               |
| Q07936 | Annexin A2                                                    |
| P82471 | Guanine nucleotide-binding protein G(q) subunit alpha         |
| E9PT65 | Radixin                                                       |
| Q498C8 | Protein RER1                                                  |

|        |                                                                         |
|--------|-------------------------------------------------------------------------|
| D4A2Z6 | Translocation protein SEC63 homolog                                     |
| P11232 | Thioredoxin                                                             |
| O88767 | Protein/nucleic acid deglycase DJ-1                                     |
| O70257 | Syntaxin-7                                                              |
| P35213 | 14-3-3 protein beta/alpha                                               |
| P34058 | Heat shock protein HSP 90-beta                                          |
| F7FNS3 | Derlin                                                                  |
| D3ZJX5 | Mitochondrial import inner membrane translocase subunit TIM50           |
| Q66H80 | Coatomer subunit delta                                                  |
| G3V7P1 | Syntaxin-12                                                             |
| P10860 | Glutamate dehydrogenase 1                                               |
| P63095 | Guanine nucleotide-binding protein G(s) subunit alpha                   |
| P52296 | Importin subunit beta-1                                                 |
| O35165 | Golgi SNAP receptor complex member 2                                    |
| R9PXR4 | Mitochondrial import receptor subunit TOM70                             |
| P63331 | Serine/threonine-protein phosphatase 2A catalytic subunit alpha isoform |
| D4A1D8 | Surfeit 4                                                               |
| D3ZGV2 | Peroxisomal membrane protein PEX16                                      |
| Q64244 | ADP-ribosyl cyclase/cyclic ADP-ribose hydrolase 1                       |
| P18418 | Calreticulin                                                            |
| O88777 | Presenilin-2                                                            |
| Q63635 | Syntaxin-6                                                              |
| Q9WU70 | Syntaxin-binding protein 5                                              |
| Q5I0E7 | Transmembrane emp24 domain-containing protein 9                         |
| Q9Z2Q7 | Syntaxin-8                                                              |
| P54921 | Alpha-soluble NSF attachment protein (SNAP-alpha)                       |
| F1M7T6 | Translocon-associated protein subunit gamma                             |
| P61983 | 14-3-3 protein gamma                                                    |
| F1LQR8 | Inositol 1,4,5-trisphosphate receptor type 2                            |
| P21708 | Mitogen-activated protein kinase 3                                      |
| Q08849 | Syntaxin-3                                                              |
| P09527 | Ras-related protein Rab-7a                                              |
| Q8CFN2 | Cell division control protein 42 homolog (CDC42)                        |
| Q08851 | Syntaxin-5                                                              |
| Q63151 | Long chain fatty acid CoA ligase 3                                      |
| Q9JHW5 | VAMP7                                                                   |
| Q63524 | Transmembrane emp24 domain-containing protein 2                         |
| O70377 | Synaptosomal-associated protein 23 (SNAP-23)                            |
| Q1H5H1 | Thioredoxin reductase-like selenoprotein T                              |
| Q66HG9 | Mitochondrial antiviral-signaling protein                               |
| P23640 | Ras-related protein Rab-27a                                             |
| Q4V8F3 | Rhomboid-related protein 4                                              |
| P51146 | Ras-related protein Rab-4b                                              |
| Q07014 | Tyrosine-protein kinase Lyn                                             |

|        |                                                   |
|--------|---------------------------------------------------|
| P62747 | Rho-related GTP-binding protein RhoB              |
| Q4AEF8 | Coatomer subunit gamma 1                          |
| P31977 | Ezrin                                             |
| P07150 | Annexin A1                                        |
| Q6AYQ1 | Golgin subfamily A member 7                       |
| F1LW77 | Ras-related protein Rab-33b                       |
| Q6MG49 | Large proline-rich protein BAG6                   |
| Q9Z2S9 | Flotillin-2                                       |
| Q5XIH7 | Prohibitin 2                                      |
| G3V8A5 | Vacuolar protein sorting-associated protein 35    |
| D3ZP98 | Minor histocompatibility antigen H13              |
| F1LVV4 | Protein RCC2                                      |
| Q5U362 | Annexin A4                                        |
| Q5U1Y2 | Ras-related C3 botulinum toxin substrate 2 (Rac2) |
| B2RZD1 | Protein transport protein Sec61 subunit beta      |
| P11442 | Clathrin heavy chain 1                            |
| Q6AXQ0 | SUMO-activating enzyme subunit 1                  |
| Q6AY20 | Cation-dependent mannose-6-phosphate receptor     |
| D3ZMR1 | Translocase of outer mitochondrial membrane 7     |
| Q5EB77 | Ras-related protein Rab-18                        |
| P61107 | Ras-related protein Rab-14                        |
| Q6AY18 | GTP-binding protein SAR1a                         |
| D4ADS9 | EFR3 homolog A                                    |
| Q6PCU4 | Emerin                                            |
| P61972 | Nuclear transport factor 2                        |
| P49134 | Integrin beta 1                                   |
| F1M391 | Stimulator of interferon genes protein            |
| Q68FQ0 | T-complex protein 1 epsilon                       |
| D4A781 | Importin 5                                        |
| P35355 | Prostaglandin G/H synthase 2                      |
| E9PU78 | Isoform Bcl-X(S) of Bcl-2-like protein 1          |
| E9PU77 | Synaptotagmin-like protein 3                      |
| Q6NYB7 | Ras-related protein Rab-1a                        |
| D4A376 | Ras-related protein Rab-12                        |
| Q6AXT5 | Ras-related protein Rab-21                        |
| D3ZPR0 | Exportin-2                                        |
| F1LQ81 | Vesicle-fusing ATPase                             |
| Q63269 | Inositol 1,4,5-trisphosphate receptor type 3      |
| P63245 | Receptor of activated protein C kinase 1 (RACK1)  |
| G3V6P7 | Myosin heavy chain 9                              |
| A1L134 | Ancient ubiquitous protein 1                      |
| P46462 | Transitional endoplasmic reticulum ATPase         |
| Q04970 | GTPase NRas                                       |
| Q4KM74 | Vesicle-trafficking protein SEC22b                |



|        |                                                                |
|--------|----------------------------------------------------------------|
| Q32PX6 | Rho-related GTP-binding protein RhoG                           |
| D3ZD11 | Signal peptidase complex subunit 2                             |
| E9PTW1 | Secretory carrier-associated membrane protein                  |
| Q3KRC3 | Signal recognition particle receptor alpha                     |
| O88600 | Heat shock 70 kDa protein 4                                    |
| D4A0E2 | NSF attachment protein gamma                                   |
| Q6MGA3 | Antigen peptide transporter 2                                  |
| P45592 | Cofilin-1                                                      |
| Q6AXN3 | Transmembrane emp24 domain-containing protein 5                |
| F1LNT8 | VAMP8                                                          |
| O35142 | Coatomer subunit beta 2                                        |
| Q4V8C2 | Centromere/kinetochore protein zw10 homolog                    |
| Q9JJ19 | Na(+)/H(+) exchange regulatory cofactor NHE-RF1                |
| Q63584 | Transmembrane emp24 domain-containing protein 10               |
| P48721 | Mortalin                                                       |
| Q63942 | Ras-related protein Rab-3d                                     |
| D3ZWZ1 | Integrin alpha X                                               |
| Q5XIM9 | T-complex protein 1 beta                                       |
| F1M779 | Clathrin heavy chain                                           |
| B0BN52 | Mitochondrial carrier homolog 2                                |
| P61621 | SEC61 alpha-1                                                  |
| Q5BK32 | FAS-associated factor 2                                        |
| P50398 | Rab GDP dissociation inhibitor alpha                           |
| P53987 | Monocarboxylate transporter 1                                  |
| Q62902 | Lectin mannose-binding 1                                       |
| P50399 | Rab GDP dissociation inhibitor beta                            |
| O35152 | BET1-like protein                                              |
| Q9WVB1 | Ras-related protein Rab-6a                                     |
| G3V6W2 | Prolactin regulatory element-binding protein                   |
| P35289 | Ras-related protein Rab-15                                     |
| P63018 | Heat shock cognate 71 kDa protein                              |
| P63012 | Ras-related protein Rab-3a                                     |
| Q7TP42 | Translocation protein SEC62                                    |
| Q5U316 | Ras-related protein Rab-35                                     |
| Q75Q41 | Mitochondrial import receptor subunit TOM22 homolog            |
| D3ZF97 | Endoplasmic reticulum lectin 1                                 |
| P17046 | Lysosome-associated membrane glycoprotein 2 (Lamp2)            |
| O70521 | Regulator of G-protein signaling 19                            |
| O35509 | Ras-related protein Rab-11b                                    |
| F1LNC4 | Vesicle transport through interaction with t-SNAREs homolog 1B |
| P62828 | GTP-binding nuclear protein Ran                                |
| D4ABY2 | Coatomer subunit gamma 2                                       |
| Q3T1J1 | Eukaryotic translation initiation factor 5A-1                  |
| P26453 | Basigin                                                        |

|        |                                                                     |
|--------|---------------------------------------------------------------------|
| Q5RKJ9 | Ras-related protein Rab-10                                          |
| G3V6T1 | Coatomer subunit alpha                                              |
| F1LP82 | Ras-related protein Rab-2a                                          |
| P62914 | 60S ribosomal protein L11                                           |
| Q4KLL4 | Transmembrane 9 superfamily member 4                                |
| Q9Z2J5 | VAMP5                                                               |
| P63039 | 60 kDa heat shock protein                                           |
| Q3MHS9 | Chaperonin-containing TCP1 subunit 6A                               |
| O54980 | Synaptogyrin-2                                                      |
| M0RC99 | Ras-related protein Rab-5a                                          |
| Q5XI04 | Erythrocyte band 7 integral membrane protein                        |
| Q68FX4 | Hematopoietic cell-specific LYN substrate 1 (hcls1)                 |
| F1LQ92 | Sel-1 homolog 1                                                     |
| P84817 | Mitochondrial fission 1 protein                                     |
| Q4V7D1 | Translocon-associated protein subunit alpha                         |
| P14562 | Lysosome-associated membrane glycoprotein 1 (Lamp1)                 |
| F1LQJ7 | Phosphoenolpyruvate carboxykinase [GTP], mitochondrial              |
| Q6AXV4 | Sorting and assembly machinery component 50 homolog                 |
| P27881 | Hexokinase-2                                                        |
| P14668 | Annexin A5                                                          |
| Q63083 | Nucleobindin-1                                                      |
| Q63085 | Cyclic GMP-inhibited phosphodiesterase B                            |
| Q5U1Z9 | Metaxin 2                                                           |
| Q9Z1E1 | Flotillin-1                                                         |
| P63025 | VAMP3                                                               |
| D3ZFK5 | Signal peptidase complex subunit 1                                  |
| P13832 | Myosin regulatory light chain RLC-A                                 |
| Q4KM97 | Tyrosine-protein kinase BLK                                         |
| Q62940 | E3 ubiquitin-protein ligase NEDD4                                   |
| B0BNJ1 | Sorcin                                                              |
| P68255 | 14-3-3 protein theta                                                |
| G3V9A3 | 14-3-3 protein sigma                                                |
| Q6P6U0 | Tyrosine-protein kinase Fgr                                         |
| Q63803 | Guanine nucleotide-binding protein G(s) subunit alpha isoforms XLas |
| P23514 | Coatomer subunit beta 1                                             |
| Q62753 | Syntaxin-binding protein 2                                          |
| P35280 | Ras-related protein Rab-8a                                          |
| G3V637 | Syntaxin-binding protein 2, isoform                                 |

| ID Term            | GO Term              | Fold Enriched | Count | <i>p</i> -value | FDR      |
|--------------------|----------------------|---------------|-------|-----------------|----------|
| GO:0008104         | PROTEIN LOCALIZATION | 2.20          | 256   | 3.09E-36        | 6.05E-33 |
| Annotated proteins |                      |               |       |                 |          |

| Protein Accession | Protein Identification                                           |
|-------------------|------------------------------------------------------------------|
| Q5BK85            | Transmembrane emp24 domain-containing protein 1                  |
| Q6P503            | V-type proton ATPase subunit D                                   |
| F1M2P8            | Protein kinase C alpha                                           |
| Q62876            | Synaptogyrin-1                                                   |
| Q62726            | Serine/threonine-protein kinase ICK                              |
| Q5XIU4            | B-cell receptor-associated protein 29                            |
| Q63716            | Peroxiredoxin-1                                                  |
| G3V8I4            | Syntaxin-4A                                                      |
| Q5U204            | Ragulator complex protein LAMTOR3                                |
| F1LMK0            | A-kinase anchoring protein 1 isoform 2                           |
| G3V852            | Talin-1                                                          |
| B0BN02            | Metaxin 1                                                        |
| P10111            | Peptidyl-prolyl cis-trans isomerase A                            |
| P13084            | Nucleophosmin                                                    |
| D3ZTX0            | Transmembrane emp24 domain-containing protein 7                  |
| G3V679            | Transferrin receptor protein 1                                   |
| P29995            | Inositol 1,4,5-trisphosphate receptor type 2                     |
| P62260            | 14-3-3 protein epsilon                                           |
| F1M8X9            | Golgi brefeldin A-resistant guanine nucleotide exchange factor 1 |
| Q9Z270            | VAMP-associated protein A                                        |
| G3V6H0            | Ras-related protein Rab-1b                                       |
| D3ZWS0            | Protein scribble homolog                                         |
| P20417            | Protein-tyrosine phosphatase 1B                                  |
| P68511            | 14-3-3 protein eta                                               |
| Q66HD0            | Endoplasmin                                                      |
| P20411            | High affinity immunoglobulin epsilon receptor subunit gamma      |
| Q5BJY9            | Keratin, type I cytoskeletal 18                                  |
| P70550            | Ras-related protein Rab-8b                                       |
| Q62896            | Bet1 golgi vesicular membrane trafficking protein                |
| Q99P75            | Ras-related protein Rab-9a                                       |
| Q62991            | Syntaxin-binding protein 1-like 2                                |
| O88884            | A-kinase anchor protein 1, mitochondrial                         |
| Q5XI41            | Translocating chain-associated membrane protein 1                |
| P27615            | Lysosome membrane protein 2 (CD36)                               |
| G3V8G5            | Golgi apparatus protein 1                                        |
| P11762            | Galectin-1                                                       |
| P06761            | Endoplasmic reticulum chaperone BiP                              |
| P63102            | 14-3-3 protein zeta/delta                                        |
| Q9EST6            | Acidic leucine-rich nuclear phosphoprotein 32 family member B    |
| Q78P65            | Rap2A-like protein                                               |
| D3ZUZ4            | Glycosaminoglycan xylosylkinase                                  |
| P05712            | Ras-related protein Rab-2a                                       |
| P62836            | Ras-related protein Rap-1a                                       |

|        |                                                                         |
|--------|-------------------------------------------------------------------------|
| Q1WIM3 | Cell adhesion molecule 3                                                |
| Q01827 | Vesicular amine transporter 2                                           |
| P97887 | Presenilin-1                                                            |
| P36370 | Antigen peptide transporter 1                                           |
| P82995 | Heat shock protein HSP 90-alpha                                         |
| P52555 | Endoplasmic reticulum resident protein 29                               |
| Q62611 | Interleukin 1 receptor-like 1                                           |
| G3V8F5 | Mitochondrial import receptor subunit TOM40 homolog                     |
| Q5XI38 | Lymphocyte cytosolic protein 1                                          |
| Q5XID0 | Protein YIPF5                                                           |
| Q5RKH6 | Protein OS-9                                                            |
| P13383 | Nucleolin                                                               |
| P05708 | Hexokinase-1                                                            |
| P13386 | High affinity immunoglobulin epsilon receptor subunit beta              |
| M0RDI5 | Mitochondrial calcium uniporter                                         |
| Q6RUV5 | Ras-related C3 botulinum toxin substrate 1 (Rac1)                       |
| Q07936 | Annexin A2                                                              |
| Q5XID7 | Armadillo repeat-containing X-linked protein 3                          |
| P82471 | Guanine nucleotide-binding protein G(q) subunit alpha                   |
| E9PT65 | Radixin                                                                 |
| Q498C8 | Protein RER1                                                            |
| D4A2Z6 | Translocation protein SEC63 homolog                                     |
| P11232 | Thioredoxin                                                             |
| O88767 | Protein/nucleic acid deglycase DJ-1                                     |
| O70257 | Syntaxin-7                                                              |
| P62329 | Thymosin beta-4                                                         |
| P35213 | 14-3-3 protein beta/alpha                                               |
| P34058 | Heat shock protein HSP 90-beta                                          |
| F7FNS3 | Derlin                                                                  |
| Q642E3 | CDK5 regulatory subunit-associated protein 3, isoform                   |
| D3ZJX5 | Mitochondrial import inner membrane translocase subunit TIM50           |
| Q66H80 | Coatomer subunit delta                                                  |
| G3V7P1 | Syntaxin-12                                                             |
| P10860 | Glutamate dehydrogenase 1                                               |
| P63095 | Guanine nucleotide-binding protein G(s) subunit alpha                   |
| G3V7Q7 | Ras GTPase-activating-like protein IQGAP1                               |
| P52296 | Importin subunit beta-1                                                 |
| O35165 | Golgi SNAP receptor complex member 2                                    |
| R9PXR4 | Mitochondrial import receptor subunit TOM70                             |
| P63331 | Serine/threonine-protein phosphatase 2A catalytic subunit alpha isoform |
| D4A1D8 | Surfeit 4                                                               |
| D3ZGV2 | Peroxisomal membrane protein PEX16                                      |
| Q5PQX1 | Torsin-1A-interacting protein 1                                         |
| Q64244 | ADP-ribosyl cyclase/cyclic ADP-ribose hydrolase 1                       |

|        |                                                      |
|--------|------------------------------------------------------|
| P18418 | Calreticulin                                         |
| Q6P9V1 | CD81 molecule                                        |
| Q63635 | Syntaxin-6                                           |
| O88777 | Presenilin-2                                         |
| Q9WU70 | Syntaxin-binding protein 5                           |
| Q5I0E7 | Transmembrane emp24 domain-containing protein 9      |
| Q9Z2Q7 | Syntaxin-8                                           |
| P54921 | Alpha-soluble NSF attachment protein (SNAP-alpha)    |
| F1M7T6 | Translocon-associated protein subunit gamma          |
| P61983 | 14-3-3 protein gamma                                 |
| F1LQR8 | Inositol 1,4,5-trisphosphate receptor type 2         |
| P21708 | Mitogen-activated protein kinase 3                   |
| Q08849 | Syntaxin-3                                           |
| Q8CFN2 | Cell division control protein 42 homolog (CDC42)     |
| P09527 | Ras-related protein Rab-7a                           |
| Q08851 | Syntaxin-5                                           |
| Q63151 | Long chain fatty acid CoA ligase 3                   |
| Q9JHW5 | VAMP7                                                |
| Q63524 | Transmembrane emp24 domain-containing protein 2      |
| O70377 | Synaptosomal-associated protein 23 (SNAP-23)         |
| Q1H5H1 | Thioredoxin reductase-like selenoprotein T           |
| Q66HG9 | Mitochondrial antiviral-signaling protein            |
| Q68FP1 | Gelsolin                                             |
| P23640 | Ras-related protein Rab-27a                          |
| Q4V8F3 | Rhomboid-related protein 4                           |
| P51146 | Ras-related protein Rab-4b                           |
| Q07014 | Tyrosine-protein kinase Lyn                          |
| P62747 | Rho-related GTP-binding protein RhoB                 |
| Q4AEF8 | Coatamer subunit gamma 1                             |
| M0RAU0 | Advanced glycosylation end product-specific receptor |
| P31977 | Ezrin                                                |
| P07150 | Annexin A1                                           |
| Q6AYQ1 | Golgin subfamily A member 7                          |
| B2RYB8 | Integrin beta 2                                      |
| F1LW77 | Ras-related protein Rab-33b                          |
| Q6MG49 | Large proline-rich protein BAG6                      |
| Q9Z2S9 | Flotillin-2                                          |
| Q5XIH7 | Prohibitin 2                                         |
| G3V8A5 | Vacuolar protein sorting-associated protein 35       |
| Q5BQE6 | Delta(24)-sterol reductase                           |
| D3ZP98 | Minor histocompatibility antigen H13                 |
| F1LVV4 | Protein RCC2                                         |
| D4A465 | Ragulator complex protein LAMTOR2                    |
| Q5U362 | Annexin A4                                           |

|        |                                                   |
|--------|---------------------------------------------------|
| Q5U1Y2 | Ras-related C3 botulinum toxin substrate 2 (Rac2) |
| B2RZD1 | Protein transport protein Sec61 subunit beta      |
| P11442 | Clathrin heavy chain 1                            |
| Q6AXQ0 | SUMO-activating enzyme subunit 1                  |
| Q6AY20 | Cation-dependent mannose-6-phosphate receptor     |
| D3ZMR1 | Translocase of outer mitochondrial membrane 7     |
| Q5EB77 | Ras-related protein Rab-18                        |
| P61107 | Ras-related protein Rab-14                        |
| Q6AY18 | GTP-binding protein SAR1a                         |
| D4ADS9 | EFR3 homolog A                                    |
| Q6PCU4 | Emerin                                            |
| P61972 | Nuclear transport factor 2                        |
| P49134 | Integrin beta 1                                   |
| P97546 | Neuroplastin                                      |
| F1M391 | Stimulator of interferon genes protein            |
| Q68FQ0 | T-complex protein 1 epsilon                       |
| D4A781 | Importin 5                                        |
| P35355 | Prostaglandin G/H synthase 2                      |
| E9PU78 | Isoform Bcl-X(S) of Bcl-2-like protein 1          |
| E9PU77 | Synaptotagmin-like protein 3                      |
| Q6NYB7 | Ras-related protein Rab-1a                        |
| D4A376 | Ras-related protein Rab-12                        |
| Q6AXT5 | Ras-related protein Rab-21                        |
| Q9JLH7 | CDK5 regulatory subunit-associated protein 3      |
| D3ZPR0 | Exportin-2                                        |
| F1LQ81 | Vesicle-fusing ATPase                             |
| Q63269 | Inositol 1,4,5-trisphosphate receptor type 3      |
| G3V7M2 | Integrin beta 7                                   |
| P63245 | Receptor of activated protein C kinase 1 (RACK1)  |
| A1L134 | Ancient ubiquitous protein 1                      |
| G3V6P7 | Myosin heavy chain 9                              |
| P46462 | Transitional endoplasmic reticulum ATPase         |
| Q04970 | GTPase NRas                                       |
| Q4KM74 | Vesicle-trafficking protein SEC22b                |
| Q32PX6 | Rho-related GTP-binding protein RhoG              |
| D3ZD11 | Signal peptidase complex subunit 2                |
| E9PTW1 | Secretory carrier-associated membrane protein     |
| Q3KRC3 | Signal recognition particle receptor alpha        |
| D4ADE8 | ATP-dependent RNA helicase DDX3X                  |
| O88600 | Heat shock 70 kDa protein 4                       |
| D4A0E2 | NSF attachment protein gamma                      |
| Q6MGA3 | Antigen peptide transporter 2                     |
| P45592 | Cofilin-1                                         |
| Q6AXN3 | Transmembrane emp24 domain-containing protein 5   |

|        |                                                                |
|--------|----------------------------------------------------------------|
| F1LNT8 | VAMP8                                                          |
| Q6P791 | Ragulator complex protein LAMTOR1                              |
| O35142 | Coatomer subunit beta 2                                        |
| Q63377 | Sodium/potassium-transporting ATPase subunit beta-3            |
| Q4V8C2 | Centromere/kinetochore protein zw10 homolog                    |
| D3ZF11 | Ragulator complex protein LAMTOR5                              |
| Q9JJ19 | Na(+)/H(+) exchange regulatory cofactor NHE-RF1                |
| Q63584 | Transmembrane emp24 domain-containing protein 10               |
| P48721 | Mortalin                                                       |
| Q63942 | Ras-related protein Rab-3d                                     |
| D3ZWZ1 | Integrin alpha X                                               |
| Q5XIM9 | T-complex protein 1 beta                                       |
| F1M779 | Clathrin heavy chain                                           |
| B0BN52 | Mitochondrial carrier homolog 2                                |
| P61621 | SEC61 alpha-1                                                  |
| Q5BK32 | FAS-associated factor 2                                        |
| P50398 | Rab GDP dissociation inhibitor alpha                           |
| P53987 | Monocarboxylate transporter 1                                  |
| Q62902 | Lectin mannose-binding 1                                       |
| P50399 | Rab GDP dissociation inhibitor beta                            |
| O35152 | BET1-like protein                                              |
| Q9WVB1 | Ras-related protein Rab-6a                                     |
| G3V6W2 | Prolactin regulatory element-binding protein                   |
| P35289 | Ras-related protein Rab-15                                     |
| P63018 | Heat shock cognate 71 kDa protein                              |
| P63012 | Ras-related protein Rab-3a                                     |
| Q7TP42 | Translocation protein SEC62                                    |
| Q5U316 | Ras-related protein Rab-35                                     |
| Q75Q41 | Mitochondrial import receptor subunit TOM22 homolog            |
| D3ZF97 | Endoplasmic reticulum lectin 1                                 |
| Q9Z1Z1 | Eukaryotic translation initiation factor 2-alpha kinase 3      |
| P17046 | Lysosome-associated membrane glycoprotein 2 (Lamp2)            |
| O70521 | Regulator of G-protein signaling 19                            |
| O35509 | Ras-related protein Rab-11b                                    |
| Q66HR2 | Microtubule-associated protein RP/EB family member 1           |
| F1LNC4 | Vesicle transport through interaction with t-SNAREs homolog 1B |
| P62828 | GTP-binding nuclear protein Ran                                |
| D4ABY2 | Coatomer subunit gamma 2                                       |
| Q3T1J1 | Eukaryotic translation initiation factor 5A-1                  |
| P26453 | Basigin                                                        |
| Q5RKJ9 | Ras-related protein Rab-10                                     |
| G3V6T1 | Coatomer subunit alpha                                         |
| F1LP82 | Ras-related protein Rab-2a                                     |
| Q5XIP2 | GPI-anchor transamidase                                        |

|        |                                                                     |
|--------|---------------------------------------------------------------------|
| P62914 | 60S ribosomal protein L11                                           |
| Q4KLL4 | Transmembrane 9 superfamily member 4                                |
| Q9Z2J5 | VAMP5                                                               |
| P63039 | 60 kDa heat shock protein                                           |
| Q3MHS9 | Chaperonin-containing TCP1 subunit 6A                               |
| O54980 | Synaptogyrin-2                                                      |
| M0RC99 | Ras-related protein Rab-5a                                          |
| Q5XI04 | Erythrocyte band 7 integral membrane protein                        |
| Q68FX4 | Hematopoietic cell-specific LYN substrate 1 (hcls1)                 |
| F1LQ92 | Sel-1 homolog 1                                                     |
| P84817 | Mitochondrial fission 1 protein                                     |
| Q4V7D1 | Translocon-associated protein subunit alpha                         |
| P14562 | Lysosome-associated membrane glycoprotein 1 (Lamp1)                 |
| F1LQJ7 | Phosphoenolpyruvate carboxykinase [GTP], mitochondrial              |
| Q63486 | Ras-related GTP-binding protein A (Rag A)                           |
| Q63483 | Ras-related protein Rab-38                                          |
| Q6AXV4 | Sorting and assembly machinery component 50 homolog                 |
| P27881 | Hexokinase-2                                                        |
| P14668 | Annexin A5                                                          |
| Q63083 | Nucleobindin-1                                                      |
| Q63085 | Cyclic GMP-inhibited phosphodiesterase B                            |
| Q5U1Z9 | Metaxin 2                                                           |
| Q9Z1E1 | Flotillin-1                                                         |
| P63025 | VAMP3                                                               |
| D3ZFK5 | Signal peptidase complex subunit 1                                  |
| P13832 | Myosin regulatory light chain RLC-A                                 |
| Q4KM97 | Tyrosine-protein kinase BLK                                         |
| Q62940 | E3 ubiquitin-protein ligase NEDD4                                   |
| B0BNJ1 | Sorcin                                                              |
| P68255 | 14-3-3 protein theta                                                |
| G3V9A3 | 14-3-3 protein sigma                                                |
| Q63803 | Guanine nucleotide-binding protein G(s) subunit alpha isoforms XLas |
| Q6P6U0 | Tyrosine-protein kinase Fgr                                         |
| F1M2K3 | Small ubiquitin-related modifier                                    |
| P23514 | Coatomer subunit beta 1                                             |
| Q62753 | Syntaxin-binding protein 2                                          |
| P35280 | Ras-related protein Rab-8a                                          |
| G3V637 | Syntaxin-binding protein 2, isoform                                 |

| ID Term            | GO Term                    | Fold Enriched | Count | <i>p</i> -value | FDR      |
|--------------------|----------------------------|---------------|-------|-----------------|----------|
| GO:0033036         | MACROMOLECULE LOCALIZATION | 2.08          | 279   | 6.90E-35        | 1.35E-31 |
| Annotated proteins |                            |               |       |                 |          |



| Protein Accession | Protein Identification                                           |
|-------------------|------------------------------------------------------------------|
| Q5BK85            | Transmembrane emp24 domain-containing protein 1                  |
| Q6P503            | V-type proton ATPase subunit D                                   |
| F1M2P8            | Protein kinase C alpha                                           |
| Q62876            | Synaptogyrin-1                                                   |
| Q62726            | Serine/threonine-protein kinase ICK                              |
| Q5XIU4            | B-cell receptor-associated protein 29                            |
| Q63716            | Peroxiredoxin-1                                                  |
| G3V8I4            | Syntaxin-4A                                                      |
| Q5U204            | Ragulator complex protein LAMTOR3                                |
| F1LMK0            | A-kinase anchoring protein 1 isoform 2                           |
| G3V852            | Talin-1                                                          |
| B0BN02            | Metaxin 1                                                        |
| P13084            | Nucleophosmin                                                    |
| P10111            | Peptidyl-prolyl cis-trans isomerase A                            |
| D3ZTX0            | Transmembrane emp24 domain-containing protein 7                  |
| G3V679            | Transferrin receptor protein 1                                   |
| P29995            | Inositol 1,4,5-trisphosphate receptor type 2                     |
| Q4FZT0            | Stomatin-like protein 2                                          |
| P62260            | 14-3-3 protein epsilon                                           |
| F1M8X9            | Golgi brefeldin A-resistant guanine nucleotide exchange factor 1 |
| Q9Z270            | VAMP-associated protein A                                        |
| Q10468            | Beta-1,4 N-acetylgalactosaminyltransferase 1                     |
| G3V6H0            | Ras-related protein Rab-1b                                       |
| D3ZWS0            | Protein scribble homolog                                         |
| P20417            | Protein-tyrosine phosphatase 1B                                  |
| P68511            | 14-3-3 protein eta                                               |
| Q66HD0            | Endoplasmin                                                      |
| P20411            | High affinity immunoglobulin epsilon receptor subunit gamma      |
| Q5BJY9            | Keratin, type I cytoskeletal 18                                  |
| P70550            | Ras-related protein Rab-8b                                       |
| Q62896            | Bet1 golgi vesicular membrane trafficking protein                |
| Q99P75            | Ras-related protein Rab-9a                                       |
| Q62991            | Syntaxin-binding protein 1-like 2                                |
| O88884            | A-kinase anchor protein 1, mitochondrial                         |
| Q5XI41            | Translocating chain-associated membrane protein 1                |
| P27615            | Lysosome membrane protein 2 (CD36)                               |
| G3V8G5            | Golgi apparatus protein 1                                        |
| P11762            | Galectin-1                                                       |
| P06761            | Endoplasmic reticulum chaperone BiP                              |
| P63102            | 14-3-3 protein zeta/delta                                        |
| Q9EST6            | Acidic leucine-rich nuclear phosphoprotein 32 family member B    |
| Q78P65            | Rap2A-like protein                                               |
| D3ZUZ4            | Glycosaminoglycan xylosylkinase                                  |

|        |                                                               |
|--------|---------------------------------------------------------------|
| D4A6A2 | Heterogeneous nuclear ribonucleoprotein A3-like               |
| P05712 | Ras-related protein Rab-2a                                    |
| M0RCF3 | Integrin beta 3                                               |
| P62836 | Ras-related protein Rap-1a                                    |
| Q1WIM3 | Cell adhesion molecule 3                                      |
| Q01827 | Vesicular amine transporter 2                                 |
| Q3B8Q2 | Eukaryotic initiation factor 4A-III                           |
| Q63413 | Spliceosome RNA helicase Ddx39b                               |
| P97887 | Presenilin-1                                                  |
| P36370 | Antigen peptide transporter 1                                 |
| P82995 | Heat shock protein HSP 90-alpha                               |
| P52555 | Endoplasmic reticulum resident protein 29                     |
| Q62611 | Interleukin 1 receptor-like 1                                 |
| G3V8F5 | Mitochondrial import receptor subunit TOM40 homolog           |
| Q5XI38 | Lymphocyte cytosolic protein 1                                |
| Q6IN37 | GM2 ganglioside activator                                     |
| Q5XID0 | Protein YIPF5                                                 |
| Q5RKH6 | Protein OS-9                                                  |
| P13383 | Nucleolin                                                     |
| P05708 | Hexokinase-1                                                  |
| P13386 | High affinity immunoglobulin epsilon receptor subunit beta    |
| M0RDI5 | Mitochondrial calcium uniporter                               |
| Q6RUV5 | Ras-related C3 botulinum toxin substrate 1 (Rac1)             |
| Q07936 | Annexin A2                                                    |
| Q5XID7 | Armadillo repeat-containing X-linked protein 3                |
| P82471 | Guanine nucleotide-binding protein G(q) subunit alpha         |
| E9PT65 | Radixin                                                       |
| Q498C8 | Protein RER1                                                  |
| D4A2Z6 | Translocation protein SEC63 homolog                           |
| P11232 | Thioredoxin                                                   |
| O88767 | Protein/nucleic acid deglycase DJ-1                           |
| O70257 | Syntaxin-7                                                    |
| P62329 | Thymosin beta-4                                               |
| P35213 | 14-3-3 protein beta/alpha                                     |
| P34058 | Heat shock protein HSP 90-beta                                |
| F7FNS3 | Derlin                                                        |
| Q642E3 | CDK5 regulatory subunit-associated protein 3, isoform         |
| D3ZJX5 | Mitochondrial import inner membrane translocase subunit TIM50 |
| Q66H80 | Coatomer subunit delta                                        |
| G3V7P1 | Syntaxin-12                                                   |
| P10860 | Glutamate dehydrogenase 1                                     |
| P63095 | Guanine nucleotide-binding protein G(s) subunit alpha         |
| G3V7Q7 | Ras GTPase-activating-like protein IQGAP1                     |
| P52296 | Importin subunit beta-1                                       |

|        |                                                                         |
|--------|-------------------------------------------------------------------------|
| O35165 | Golgi SNAP receptor complex member 2                                    |
| P63331 | Serine/threonine-protein phosphatase 2A catalytic subunit alpha isoform |
| R9PXR4 | Mitochondrial import receptor subunit TOM70                             |
| D4A1D8 | Surfeit 4                                                               |
| D3ZGV2 | Peroxisomal membrane protein PEX16                                      |
| Q5PQX1 | Torsin-1A-interacting protein 1                                         |
| Q64244 | ADP-ribosyl cyclase/cyclic ADP-ribose hydrolase 1                       |
| P18418 | Calreticulin                                                            |
| Q6P9V1 | CD81 molecule                                                           |
| Q63635 | Syntaxin-6                                                              |
| O88777 | Presenilin-2                                                            |
| Q9WU70 | Syntaxin-binding protein 5                                              |
| Q5I0E7 | Transmembrane emp24 domain-containing protein 9                         |
| Q9Z2Q7 | Syntaxin-8                                                              |
| F1LM33 | Leucine-rich PPR motif-containing protein mitochondrial isoform         |
| P38983 | 40S ribosomal protein SA                                                |
| P54921 | Alpha-soluble NSF attachment protein (SNAP-alpha)                       |
| F1M7T6 | Translocon-associated protein subunit gamma                             |
| P61983 | 14-3-3 protein gamma                                                    |
| F1LQR8 | Inositol 1,4,5-trisphosphate receptor type 2                            |
| P21708 | Mitogen-activated protein kinase 3                                      |
| Q08849 | Syntaxin-3                                                              |
| Q8CFN2 | Cell division control protein 42 homolog (CDC42)                        |
| P09527 | Ras-related protein Rab-7a                                              |
| Q08851 | Syntaxin-5                                                              |
| Q63151 | Long chain fatty acid CoA ligase 3                                      |
| P58195 | Phospholipid scramblase 1                                               |
| Q9JHW5 | VAMP7                                                                   |
| Q63524 | Transmembrane emp24 domain-containing protein 2                         |
| Q9JI85 | Nucleobindin-2                                                          |
| Q5SGE0 | Leucine-rich PPR motif-containing protein mitochondrial                 |
| Q66HG9 | Mitochondrial antiviral-signaling protein                               |
| O70377 | Synaptosomal-associated protein 23 (SNAP-23)                            |
| Q1H5H1 | Thioredoxin reductase-like selenoprotein T                              |
| Q68FP1 | Gelsolin                                                                |
| P23640 | Ras-related protein Rab-27a                                             |
| Q4V8F3 | Rhomboid-related protein 4                                              |
| P51146 | Ras-related protein Rab-4b                                              |
| Q07014 | Tyrosine-protein kinase Lyn                                             |
| P62747 | Rho-related GTP-binding protein RhoB                                    |
| Q4AEF8 | Coatamer subunit gamma 1                                                |
| M0RAU0 | Advanced glycosylation end product-specific receptor                    |
| P31977 | Ezrin                                                                   |
| P07150 | Annexin A1                                                              |

|        |                                                   |
|--------|---------------------------------------------------|
| G3V7A5 | Low density lipoprotein receptor isoform          |
| Q6AYQ1 | Golgin subfamily A member 7                       |
| B2RYB8 | Integrin beta 2                                   |
| F1LW77 | Ras-related protein Rab-33b                       |
| Q6MG49 | Large proline-rich protein BAG6                   |
| Q9Z2S9 | Flotillin-2                                       |
| Q5XIH7 | Prohibitin 2                                      |
| G3V8A5 | Vacuolar protein sorting-associated protein 35    |
| Q5BQE6 | Delta(24)-sterol reductase                        |
| D3ZP98 | Minor histocompatibility antigen H13              |
| F1LVV4 | Protein RCC2                                      |
| D4A465 | Ragulator complex protein LAMTOR2                 |
| Q5U362 | Annexin A4                                        |
| Q5U1Y2 | Ras-related C3 botulinum toxin substrate 2 (Rac2) |
| B2RZD1 | Protein transport protein Sec61 subunit beta      |
| F1LM82 | Heterogeneous nuclear ribonucleoproteins A2/B1    |
| P11442 | Clathrin heavy chain 1                            |
| Q6AXQ0 | SUMO-activating enzyme subunit 1                  |
| Q6AY20 | Cation-dependent mannose-6-phosphate receptor     |
| D3ZMR1 | Translocase of outer mitochondrial membrane 7     |
| Q5EB77 | Ras-related protein Rab-18                        |
| P61107 | Ras-related protein Rab-14                        |
| Q6AY18 | GTP-binding protein SAR1a                         |
| D4ADS9 | EFR3 homolog A                                    |
| Q6PCU4 | Emerin                                            |
| P61972 | Nuclear transport factor 2                        |
| P49134 | Integrin beta 1                                   |
| P97546 | Neuroplastin                                      |
| F1M391 | Stimulator of interferon genes protein            |
| Q68FQ0 | T-complex protein 1 epsilon                       |
| D4A781 | Importin 5                                        |
| P35355 | Prostaglandin G/H synthase 2                      |
| E9PU78 | Isoform Bcl-X(S) of Bcl-2-like protein 1          |
| E9PU77 | Synaptotagmin-like protein 3                      |
| Q6AXT5 | Ras-related protein Rab-21                        |
| Q6NYB7 | Ras-related protein Rab-1a                        |
| D4A376 | Ras-related protein Rab-12                        |
| Q9JLH7 | CDK5 regulatory subunit-associated protein 3      |
| D3ZPR0 | Exportin-2                                        |
| F1LQ81 | Vesicle-fusing ATPase                             |
| Q63269 | Inositol 1,4,5-trisphosphate receptor type 3      |
| G3V7M2 | Integrin beta 7                                   |
| P63245 | Receptor of activated protein C kinase 1 (RACK1)  |
| A1L134 | Ancient ubiquitous protein 1                      |

|        |                                                     |
|--------|-----------------------------------------------------|
| G3V6P7 | Myosin heavy chain 9                                |
| Q4KM74 | Vesicle-trafficking protein SEC22b                  |
| P46462 | Transitional endoplasmic reticulum ATPase           |
| Q04970 | GTPase NRas                                         |
| Q32PX6 | Rho-related GTP-binding protein RhoG                |
| D3ZD11 | Signal peptidase complex subunit 2                  |
| E9PTW1 | Secretory carrier-associated membrane protein       |
| Q3KRC3 | Signal recognition particle receptor alpha          |
| D4ADE8 | ATP-dependent RNA helicase DDX3X                    |
| O88600 | Heat shock 70 kDa protein 4                         |
| D4A0E2 | NSF attachment protein gamma                        |
| Q6MGA3 | Antigen peptide transporter 2                       |
| P45592 | Cofilin-1                                           |
| Q6AXN3 | Transmembrane emp24 domain-containing protein 5     |
| F1LNT8 | VAMP8                                               |
| Q6P791 | Ragulator complex protein LAMTOR1                   |
| F1LZX9 | Integrin alpha 5                                    |
| O35142 | Coatomer subunit beta 2                             |
| Q63377 | Sodium/potassium-transporting ATPase subunit beta-3 |
| Q4V8C2 | Centromere/kinetochore protein zw10 homolog         |
| D3ZF11 | Ragulator complex protein LAMTOR5                   |
| Q9JJ19 | Na(+)/H(+) exchange regulatory cofactor NHE-RF1     |
| Q63584 | Transmembrane emp24 domain-containing protein 10    |
| P48721 | Mortalin                                            |
| Q63942 | Ras-related protein Rab-3d                          |
| P10960 | Prosaposin                                          |
| D3ZWZ1 | Integrin alpha X                                    |
| Q5XIM9 | T-complex protein 1 beta                            |
| F1M779 | Clathrin heavy chain                                |
| B0BN52 | Mitochondrial carrier homolog 2                     |
| P61621 | SEC61 alpha-1                                       |
| Q5BK32 | FAS-associated factor 2                             |
| P50398 | Rab GDP dissociation inhibitor alpha                |
| P53987 | Monocarboxylate transporter 1                       |
| O88813 | Long chain fatty acid CoA ligase 5                  |
| Q62902 | Lectin mannose-binding 1                            |
| P50399 | Rab GDP dissociation inhibitor beta                 |
| O35152 | BET1-like protein                                   |
| Q9WVB1 | Ras-related protein Rab-6a                          |
| G3V6W2 | Prolactin regulatory element-binding protein        |
| P35289 | Ras-related protein Rab-15                          |
| P63018 | Heat shock cognate 71 kDa protein                   |
| P63012 | Ras-related protein Rab-3a                          |
| Q7TP42 | Translocation protein SEC62                         |

|        |                                                                |
|--------|----------------------------------------------------------------|
| Q5U316 | Ras-related protein Rab-35                                     |
| Q75Q41 | Mitochondrial import receptor subunit TOM22 homolog            |
| D3ZF97 | Endoplasmic reticulum lectin 1                                 |
| Q9Z1Z1 | Eukaryotic translation initiation factor 2-alpha kinase 3      |
| P17046 | Lysosome-associated membrane glycoprotein 2 (Lamp2)            |
| O35509 | Ras-related protein Rab-11b                                    |
| O70521 | Regulator of G-protein signaling 19                            |
| Q66HR2 | Microtubule-associated protein RP/EB family member 1           |
| F1LNC4 | Vesicle transport through interaction with t-SNAREs homolog 1B |
| P62828 | GTP-binding nuclear protein Ran                                |
| D4ABY2 | Coatamer subunit gamma 2                                       |
| Q3T1J1 | Eukaryotic translation initiation factor 5A-1                  |
| P26453 | Basigin                                                        |
| Q5RKJ9 | Ras-related protein Rab-10                                     |
| G3V6T1 | Coatamer subunit alpha                                         |
| F1LP82 | Ras-related protein Rab-2a                                     |
| Q5XIP2 | GPI-anchor transamidase                                        |
| P62914 | 60S ribosomal protein L11                                      |
| Q4KLL4 | Transmembrane 9 superfamily member 4                           |
| Q9Z2J5 | VAMP5                                                          |
| P63039 | 60 kDa heat shock protein                                      |
| Q6URK4 | Heterogeneous nuclear ribonucleoprotein A3                     |
| P00507 | Aspartate aminotransferase mitochondrial                       |
| Q3MHS9 | Chaperonin-containing TCP1 subunit 6A                          |
| O54980 | Synaptogyrin-2                                                 |
| M0RC99 | Ras-related protein Rab-5a                                     |
| Q5XI04 | Erythrocyte band 7 integral membrane protein                   |
| Q68FX4 | Hematopoietic cell-specific LYN substrate 1 (hcls1)            |
| P35952 | Low-density lipoprotein receptor                               |
| Q9Z1X1 | Extended synaptotagmin 1                                       |
| F1LQ92 | Sel-1 homolog 1                                                |
| P84817 | Mitochondrial fission 1 protein                                |
| Q4V7D1 | Translocon-associated protein subunit alpha                    |
| P14562 | Lysosome-associated membrane glycoprotein 1 (Lamp1)            |
| F1LQJ7 | Phosphoenolpyruvate carboxykinase [GTP], mitochondrial         |
| Q63486 | Ras-related GTP-binding protein A (Rag A)                      |
| Q63483 | Ras-related protein Rab-38                                     |
| Q6AXV4 | Sorting and assembly machinery component 50 homolog            |
| P27881 | Hexokinase-2                                                   |
| P14668 | Annexin A5                                                     |
| Q2YDU8 | Protein spinster homolog 1                                     |
| Q63083 | Nucleobindin-1                                                 |
| Q63085 | Cyclic GMP-inhibited phosphodiesterase B                       |
| Q5U1Z9 | Metaxin 2                                                      |

|        |                                                                     |
|--------|---------------------------------------------------------------------|
| Q9Z1E1 | Flotillin-1                                                         |
| P63025 | VAMP3                                                               |
| D3ZFK5 | Signal peptidase complex subunit 1                                  |
| P13832 | Myosin regulatory light chain RLC-A                                 |
| Q4KM97 | Tyrosine-protein kinase BLK                                         |
| Q62940 | E3 ubiquitin-protein ligase NEDD4                                   |
| B0BNJ1 | Sorcin                                                              |
| P68255 | 14-3-3 protein theta                                                |
| G3V9A3 | 14-3-3 protein sigma                                                |
| Q63803 | Guanine nucleotide-binding protein G(s) subunit alpha isoforms XLas |
| Q6P6U0 | Tyrosine-protein kinase Fgr                                         |
| F1M2K3 | Small ubiquitin-related modifier                                    |
| P23514 | Coatomer subunit beta 1                                             |
| Q62753 | Syntaxin-binding protein 2                                          |
| P35280 | Ras-related protein Rab-8a                                          |
| G3V637 | Syntaxin-binding protein 2, isoform                                 |

### Annotation Cluster Enrichment Score: 17.93

| ID Term            | GO Term                   | Fold Enriched | Count                                                             | <i>p</i> -value | FDR      |
|--------------------|---------------------------|---------------|-------------------------------------------------------------------|-----------------|----------|
| GO:0098857         | MEMBRANE MICRODOMAIN/RAFT | 3.67          | 65                                                                | 5.09E-19        | 7.88E-16 |
| Annotated proteins |                           |               |                                                                   |                 |          |
| Protein Accession  |                           |               | Protein Identification                                            |                 |          |
| D4A465             |                           |               | Ragulator complex protein LAMTOR2                                 |                 |          |
| Q9Z2L0             |                           |               | Voltage-dependent anion-selective channel protein 1               |                 |          |
| P63018             |                           |               | Heat shock cognate 71 kDa protein                                 |                 |          |
| B5DEH2             |                           |               | Erlin-2                                                           |                 |          |
| F1M2P8             |                           |               | Protein kinase C alpha                                            |                 |          |
| Q00238             |                           |               | Intercellular adhesion molecule 1 (ICAM1)                         |                 |          |
| Q5U204             |                           |               | Ragulator complex protein LAMTOR3                                 |                 |          |
| O88767             |                           |               | Protein/nucleic acid deglycase DJ-1                               |                 |          |
| P11167             |                           |               | Solute carrier family 2, facilitated glucose transporter member 1 |                 |          |
| P10252             |                           |               | CD48 antigen                                                      |                 |          |
| P17046             |                           |               | Lysosome-associated membrane glycoprotein 2 (Lamp2)               |                 |          |
| O70521             |                           |               | Regulator of G-protein signaling 19                               |                 |          |
| P06686             |                           |               | Sodium/potassium-transporting ATPase subunit alpha-2              |                 |          |
| O08775             |                           |               | Vascular endothelial growth factor receptor 2                     |                 |          |
| P06685             |                           |               | Sodium/potassium-transporting ATPase subunit alpha-1              |                 |          |
| G3V7P1             |                           |               | Syntaxin-12                                                       |                 |          |
| Q4FZT0             |                           |               | Stomatin-like protein 2                                           |                 |          |
| P49134             |                           |               | Integrin beta 1                                                   |                 |          |

|        |                                                                     |
|--------|---------------------------------------------------------------------|
| P09456 | cAMP-dependent protein kinase type I-alpha regulatory subunit       |
| P63095 | Guanine nucleotide-binding protein G(s) subunit alpha               |
| G3V7Q7 | Ras GTPase-activating-like protein IQGAP1                           |
| Q3SWT0 | Platelet endothelial cell adhesion molecule (Pecam1)                |
| P35355 | Prostaglandin G/H synthase 2                                        |
| P26453 | Basigin                                                             |
| Q62636 | Ras-related protein Rap-1b                                          |
| P81155 | Voltage-dependent anion-selective channel protein 2                 |
| G3V8Z1 | Linker for activation of T-cells family member 2 (NTAL)             |
| P12368 | cAMP-dependent protein kinase type II-alpha regulatory subunit      |
| P08644 | GTPase KRas                                                         |
| Q07647 | Solute carrier family 2, facilitated glucose transporter member 3   |
| Q63198 | Contactin 1                                                         |
| P63039 | 60 kDa heat shock protein                                           |
| A3RLA8 | Low affinity immunoglobulin gamma Fc region receptor II             |
| P21708 | Mitogen-activated protein kinase 3                                  |
| P04897 | Guanine nucleotide-binding protein G(i) subunit alpha-2             |
| P06762 | Heme oxygenase 1                                                    |
| P16617 | Phosphoglycerate kinase 1                                           |
| Q01621 | Tyrosine-protein kinase LCK                                         |
| Q6P6T6 | Cathepsin D                                                         |
| Q6P791 | Ragulator complex protein LAMTOR1                                   |
| M0RC99 | Ras-related protein Rab-5a                                          |
| Q5XI04 | Erythrocyte band 7 integral membrane protein                        |
| P58195 | Phospholipid scramblase 1                                           |
| P35952 | Low-density lipoprotein receptor                                    |
| P61227 | Ras-related protein Rap-2b                                          |
| P01830 | Thy-1 membrane glycoprotein                                         |
| D3ZF11 | Ragulator complex protein LAMTOR5                                   |
| Q63377 | Sodium/potassium-transporting ATPase subunit beta-3                 |
| Q9JJ19 | Na(+)/H(+) exchange regulatory cofactor NHE-RF1                     |
| Q07014 | Tyrosine-protein kinase Lyn                                         |
| P08753 | Guanine nucleotide-binding protein G(k) subunit alpha               |
| P97887 | Presenilin-1                                                        |
| P31977 | Ezrin                                                               |
| Q9Z1E1 | Flotillin-1                                                         |
| P05708 | Hexokinase-1                                                        |
| P13386 | High affinity immunoglobulin epsilon receptor subunit beta          |
| P04157 | Receptor-type tyrosine-protein phosphatase C (CD45)                 |
| G3V7A5 | Low density lipoprotein receptor isoform                            |
| Q62940 | E3 ubiquitin-protein ligase NEDD4                                   |
| B2RYB8 | Integrin beta 2                                                     |
| Q07936 | Annexin A2                                                          |
| Q63803 | Guanine nucleotide-binding protein G(s) subunit alpha isoforms XLas |



|        |                                                       |
|--------|-------------------------------------------------------|
| P82471 | Guanine nucleotide-binding protein G(q) subunit alpha |
| P05197 | Elongation factor 2                                   |
| Q9Z2S9 | Flotillin-2                                           |

| ID Term            | GO Term         | Fold Enriched | Count                                                             | p-value  | FDR      |
|--------------------|-----------------|---------------|-------------------------------------------------------------------|----------|----------|
| GO:0098589         | MEMBRANE REGION | 3.33          | 69                                                                | 6.04E-18 | 9.35E-15 |
| Annotated proteins |                 |               |                                                                   |          |          |
| Protein Accession  |                 |               | Protein Identification                                            |          |          |
| D4A465             |                 |               | Regulator complex protein LAMTOR2                                 |          |          |
| Q9Z2L0             |                 |               | Voltage-dependent anion-selective channel protein 1               |          |          |
| P63018             |                 |               | Heat shock cognate 71 kDa protein                                 |          |          |
| B5DEH2             |                 |               | Erlin-2                                                           |          |          |
| F1M2P8             |                 |               | Protein kinase C alpha                                            |          |          |
| P11442             |                 |               | Clathrin heavy chain 1                                            |          |          |
| Q00238             |                 |               | Intercellular adhesion molecule 1 (ICAM1)                         |          |          |
| Q5U204             |                 |               | Regulator complex protein LAMTOR3                                 |          |          |
| O88767             |                 |               | Protein/nucleic acid deglycase DJ-1                               |          |          |
| Q5U316             |                 |               | Ras-related protein Rab-35                                        |          |          |
| P11167             |                 |               | Solute carrier family 2, facilitated glucose transporter member 1 |          |          |
| P10252             |                 |               | CD48 antigen                                                      |          |          |
| P17046             |                 |               | Lysosome-associated membrane glycoprotein 2 (Lamp2)               |          |          |
| O70521             |                 |               | Regulator of G-protein signaling 19                               |          |          |
| G3V679             |                 |               | Transferrin receptor protein 1                                    |          |          |
| P06686             |                 |               | Sodium/potassium-transporting ATPase subunit alpha-2              |          |          |
| O08775             |                 |               | Vascular endothelial growth factor receptor 2                     |          |          |
| P06685             |                 |               | Sodium/potassium-transporting ATPase subunit alpha-1              |          |          |
| G3V7P1             |                 |               | Syntaxin-12                                                       |          |          |
| Q4FZT0             |                 |               | Stomatin-like protein 2                                           |          |          |
| P49134             |                 |               | Integrin beta 1                                                   |          |          |
| P09456             |                 |               | cAMP-dependent protein kinase type I-alpha regulatory subunit     |          |          |
| P63095             |                 |               | Guanine nucleotide-binding protein G(s) subunit alpha             |          |          |
| G3V7Q7             |                 |               | Ras GTPase-activating-like protein IQGAP1                         |          |          |
| Q3SWT0             |                 |               | Platelet endothelial cell adhesion molecule (Pecam1)              |          |          |
| P35355             |                 |               | Prostaglandin G/H synthase 2                                      |          |          |
| Q3T1J1             |                 |               | Eukaryotic translation initiation factor 5A-1                     |          |          |
| P26453             |                 |               | Basigin                                                           |          |          |
| Q62636             |                 |               | Ras-related protein Rap-1b                                        |          |          |
| P81155             |                 |               | Voltage-dependent anion-selective channel protein 2               |          |          |
| G3V8Z1             |                 |               | Linker for activation of T-cells family member 2 (NTAL)           |          |          |
| P12368             |                 |               | cAMP-dependent protein kinase type II-alpha regulatory subunit    |          |          |
| P08644             |                 |               | GTPase KRas                                                       |          |          |
| Q07647             |                 |               | Solute carrier family 2, facilitated glucose transporter member 3 |          |          |

|        |                                                                     |
|--------|---------------------------------------------------------------------|
| Q63198 | Contactin 1                                                         |
| P63039 | 60 kDa heat shock protein                                           |
| A3RLA8 | Low affinity immunoglobulin gamma Fc region receptor II             |
| P21708 | Mitogen-activated protein kinase 3                                  |
| P04897 | Guanine nucleotide-binding protein G(i) subunit alpha-2             |
| P06762 | Heme oxygenase 1                                                    |
| P16617 | Phosphoglycerate kinase 1                                           |
| Q01621 | Tyrosine-protein kinase LCK                                         |
| Q6P6T6 | Cathepsin D                                                         |
| Q6P791 | Ragulator complex protein LAMTOR1                                   |
| M0RC99 | Ras-related protein Rab-5a                                          |
| Q5XI04 | Erythrocyte band 7 integral membrane protein                        |
| P58195 | Phospholipid scramblase 1                                           |
| P35952 | Low-density lipoprotein receptor                                    |
| P61227 | Ras-related protein Rap-2b                                          |
| P01830 | Thy-1 membrane glycoprotein                                         |
| D3ZF11 | Ragulator complex protein LAMTOR5                                   |
| Q63377 | Sodium/potassium-transporting ATPase subunit beta-3                 |
| Q9JJ19 | Na(+)/H(+) exchange regulatory cofactor NHE-RF1                     |
| Q07014 | Tyrosine-protein kinase Lyn                                         |
| P08753 | Guanine nucleotide-binding protein G(k) subunit alpha               |
| P97887 | Presenilin-1                                                        |
| P31977 | Ezrin                                                               |
| F1M779 | Clathrin heavy chain                                                |
| Q9Z1E1 | Flotillin-1                                                         |
| P05708 | Hexokinase-1                                                        |
| P13386 | High affinity immunoglobulin epsilon receptor subunit beta          |
| P04157 | Receptor-type tyrosine-protein phosphatase C (CD45)                 |
| G3V7A5 | Low density lipoprotein receptor isoform                            |
| Q62940 | E3 ubiquitin-protein ligase NEDD4                                   |
| B2RYB8 | Integrin beta 2                                                     |
| Q07936 | Annexin A2                                                          |
| Q63803 | Guanine nucleotide-binding protein G(s) subunit alpha isoforms XLas |
| P82471 | Guanine nucleotide-binding protein G(q) subunit alpha               |
| P05197 | Elongation factor 2                                                 |
| Q9Z2S9 | Flotillin-2                                                         |

**Annotation Cluster Enrichment Score: 16.14**

| ID Term     | GO Term  | Fold Enriched | Count | <i>p</i> -value | FDR      |
|-------------|----------|---------------|-------|-----------------|----------|
| UP_KEYWORDS | MEMBRANE | 1.54          | 510   | 1.41E-33        | 1.92E-30 |

# Annotated proteins

| Protein Accession | Protein Identification                                                  |
|-------------------|-------------------------------------------------------------------------|
| Q62720            | Zinc transporter 1                                                      |
| D4A017            | Transmembrane protein 87 A                                              |
| Q10473            | Polypeptide N-acetylgalactosaminyltransferase 1                         |
| D3ZAF6            | ATP synthase subunit F mitochondrial                                    |
| Q5BK85            | Transmembrane emp24 domain-containing protein 1                         |
| Q5XIU9            | Membrane-associated progesterone receptor component 2                   |
| B5DEH2            | Erlin-2                                                                 |
| F1M2P8            | Protein kinase C alpha                                                  |
| Q62876            | Synaptogyrin-1                                                          |
| Q0H8B9            | C-type lectin domain family 2 member D11                                |
| Q5XIU4            | B-cell receptor-associated protein 29                                   |
| Q5U204            | Ragulator complex protein LAMTOR3                                       |
| Q6AYM8            | Glycosylphosphatidylinositol anchor attachment 1                        |
| Q8R4A1            | ERO1-like protein alpha                                                 |
| B0BN02            | Metaxin 1                                                               |
| D3ZTX0            | Transmembrane emp24 domain-containing protein 7                         |
| Q920L2            | Succinate dehydrogenase [ubiquinone] flavoprotein subunit mitochondrial |
| P06686            | Sodium/potassium-transporting ATPase subunit alpha-2                    |
| P06687            | Sodium/potassium-transporting ATPase subunit alpha-3                    |
| F1MA50            | transmembrane protein 123                                               |
| P06685            | Sodium/potassium-transporting ATPase subunit alpha-1                    |
| Q641Y2            | NADH dehydrogenase [ubiquinone] iron-sulfur protein 2                   |
| D3ZAS9            | DDRGK domain containing 1                                               |
| Q641Y0            | Oligosaccharyl transferase 48 kDa subunit                               |
| Q66H15            | Regulator of microtubule dynamics protein 3                             |
| Q5XI52            | Vezatin                                                                 |
| Q62733            | Lamina-associated polypeptide 2 isoform beta                            |
| Q9Z270            | VAMP-associated protein A                                               |
| Q6AYN2            | Store-operated calcium entry-associated regulatory factor (SARAF)       |
| G3V6H5            | Solute carrier family 25 member 11                                      |
| Q66H18            | Synaptophysin-like 1                                                    |
| Q10468            | Beta-1,4 N-acetylgalactosaminyltransferase 1                            |
| G3V6H0            | Ras-related protein Rab-1b                                              |
| P27139            | Carbonic anhydrase 2                                                    |
| Q66H50            | Fatty acyl-CoA reductase 1                                              |
| G3V9U7            | Sarcoplasmic/endoplasmic reticulum calcium ATPase 3 (SERCA3)            |
| Q9ES40            | PRA1 family protein 3                                                   |
| P61589            | Transforming protein RhoA                                               |
| P20417            | Protein-tyrosine phosphatase 1B                                         |
| Q9Z269            | VAMP-associated protein B                                               |
| P67779            | Prohibitin                                                              |
| Q5FVF4            | Transmembrane 7 superfamily member 3                                    |

|        |                                                                |
|--------|----------------------------------------------------------------|
| Q4V888 | Type 2 phosphatidylinositol 4,5-bisphosphate 4-phosphatase     |
| P21571 | ATP synthase-coupling factor 6 mitochondrial                   |
| P20411 | High affinity immunoglobulin epsilon receptor subunit gamma    |
| F1M5Z5 | Anoctamin-6                                                    |
| Q62896 | Bet1 golgi vesicular membrane trafficking protein              |
| Q62991 | Syntaxin-binding protein 1-like 2                              |
| P51796 | Chloride intracellular channel protein 5                       |
| O88884 | A-kinase anchor protein 1, mitochondrial                       |
| Q5XI41 | Translocating chain-associated membrane protein 1              |
| P27615 | Lysosome membrane protein 2 (CD36)                             |
| A1L1L6 | Mitochondrial Rho GTPase 1                                     |
| P06762 | Heme oxygenase 1                                               |
| Q9QYV0 | Disintegrin and metalloproteinase domain-containing protein 15 |
| B5DFJ2 | Protein FAM3A                                                  |
| Q66H21 | Cholinephosphotransferase 1                                    |
| G3V878 | Signal peptidase complex catalytic subunit SEC11               |
| B0K020 | CDGSH iron-sulfur domain-containing protein 1                  |
| D3ZYM4 | Macrophage stimulating 1 receptor                              |
| P32089 | Citrate transport protein                                      |
| D4A416 | Cleft lip and palate transmembrane protein 1-like protein      |
| Q4V899 | Transmembrane protein 165                                      |
| Q861Q1 | MHC class I antigen                                            |
| M0RCF3 | Integrin beta 3                                                |
| G3V8V4 | Ceramide synthase 2                                            |
| Q1WIM3 | Cell adhesion molecule 3                                       |
| Q3KR86 | MICOS complex subunit Mic60                                    |
| Q5XI31 | GPI transamidase component PIG-S                               |
| P97887 | Presenilin-1                                                   |
| Q9QYW3 | MOB-like protein phocein                                       |
| Q62611 | Interleukin 1 receptor-like 1                                  |
| O88994 | Mitochondrial amidoxime reducing component 2                   |
| Q5BJZ3 | Nicotinamide nucleotide transhydrogenase                       |
| P04764 | Alpha-enolase                                                  |
| Q5XI36 | CD97                                                           |
| G3V887 | V-type proton ATPase subunit A                                 |
| M0RDI5 | Mitochondrial calcium uniporter                                |
| Q64578 | Sarcoplasmic/endoplasmic reticulum calcium ATPase 1 (SERCA1)   |
| Q9R1Z0 | Voltage-dependent anion-selective channel protein 3            |
| G3V9X8 | Magnesium transporter protein 1                                |
| D3ZD83 | Major facilitator superfamily domain-containing protein 10     |
| P63322 | Ras-related protein Ral-A                                      |
| D4A533 | Transmembrane anterior posterior transformation protein 1      |
| Q6AYQ4 | Transmembrane protein 109                                      |
| Q64541 | Sodium/potassium-transporting ATPase subunit alpha-4           |

|        |                                                                 |
|--------|-----------------------------------------------------------------|
| O70257 | Syntaxin-7                                                      |
| Q5FVC4 | DnaJ (Hsp40) homolog subfamily B member 12                      |
| O88767 | Protein/nucleic acid deglycase DJ-1                             |
| O08984 | Lamin-B receptor                                                |
| P51577 | P2X purinoceptor 4                                              |
| D3ZUX5 | MICOS complex subunit MIC-19                                    |
| F7FNS3 | Derlin                                                          |
| O08775 | Vascular endothelial growth factor receptor 2                   |
| Q80ZA5 | Sodium-driven chloride bicarbonate exchanger                    |
| Q66H80 | Coatomer subunit delta                                          |
| G3V7P1 | Syntaxin-12                                                     |
| Q920P6 | Adenosine deaminase                                             |
| Q91ZN1 | Coronin-1A                                                      |
| P04785 | Protein disulfide-isomerase                                     |
| G3V9Y2 | Phospholipid phosphatase 1                                      |
| Q63016 | Large neutral amino acids transporter small subunit 1           |
| O35165 | Golgi SNAP receptor complex member 2                            |
| R9PXR4 | Mitochondrial import receptor subunit TOM70                     |
| Q63116 | Mast/stem cell growth factor receptor                           |
| Q64244 | ADP-ribosyl cyclase/cyclic ADP-ribose hydrolase 1               |
| P81155 | Voltage-dependent anion-selective channel protein 2             |
| G3V964 | Neurotrimin                                                     |
| B0BN30 | Mitochondrial carrier homolog 1                                 |
| O88777 | Presenilin-2                                                    |
| P12368 | cAMP-dependent protein kinase type II-alpha regulatory subunit  |
| Q9WU70 | Syntaxin-binding protein 5                                      |
| Q5I0E7 | Transmembrane emp24 domain-containing protein 9                 |
| Q9Z2Q7 | Syntaxin-8                                                      |
| F1LM33 | Leucine-rich PPR motif-containing protein mitochondrial isoform |
| Q64654 | Lanosterol 14-alpha demethylase                                 |
| P38983 | 40S ribosomal protein SA                                        |
| P08644 | GTPase KRas                                                     |
| Q63965 | Sideroflexin-1                                                  |
| A1L1J9 | Lipase maturation factor 2                                      |
| F1M7T6 | Translocon-associated protein subunit gamma                     |
| F1LQR8 | Inositol 1,4,5-trisphosphate receptor type 2                    |
| P04897 | Guanine nucleotide-binding protein G(i) subunit alpha-2         |
| F1LZW6 | Solute carrier family 25 member 13                              |
| Q08849 | Syntaxin-3                                                      |
| Q8CFN2 | Cell division control protein 42 homolog (CDC42)                |
| Q8CHN6 | Sphingosine-1-phosphate lyase 1                                 |
| F6T9E7 | P-selectin glycoprotein ligand 1                                |
| Q08851 | Syntaxin-5                                                      |
| Q53B90 | Ras-related protein Rab-43                                      |

|        |                                                                         |
|--------|-------------------------------------------------------------------------|
| Q63151 | Long chain fatty acid CoA ligase 3                                      |
| P58195 | Phospholipid scramblase 1                                               |
| Q9JHW5 | VAMP7                                                                   |
| Q9JI85 | Nucleobindin-2                                                          |
| D4A2H2 | Serine palmitoyltransferase 1                                           |
| D3ZV75 | Major facilitator superfamily domain-containing protein 1               |
| P01830 | Thy-1 membrane glycoprotein                                             |
| O70377 | Synaptosomal-associated protein 23 (SNAP-23)                            |
| F1LNX2 | Calcium release-activated calcium channel protein 1 (Orai1)             |
| D3ZCZ9 | NADH dehydrogenase [ubiquinone] iron-sulfur protein 6                   |
| P21913 | Succinate dehydrogenase [ubiquinone] iron-sulfur subunit mitochondrial  |
| P51146 | Ras-related protein Rab-4b                                              |
| Q07014 | Tyrosine-protein kinase Lyn                                             |
| D3ZIJ5 | Dolichyl-phosphate mannosyltransferase subunit 3                        |
| Q07984 | Translocon-associated protein subunit delta                             |
| P31977 | Ezrin                                                                   |
| Q63135 | Complement component receptor 1-like protein                            |
| P15999 | ATP synthase subunit alpha mitochondrial                                |
| M0RCA3 | Zinc finger protein-like 1                                              |
| D3ZQG9 | RT1 class I locus CE4                                                   |
| P07150 | Annexin A1                                                              |
| Q6AYQ1 | Golgin subfamily A member 7                                             |
| Q52KJ9 | Thioredoxin-related transmembrane protein 1                             |
| Q64273 | Inward rectifier potassium channel 2                                    |
| B2RYB8 | Integrin beta 2                                                         |
| Q5HZE2 | Transmembrane protein 120 A                                             |
| Q9Z2S9 | Flotillin-2                                                             |
| P07153 | Dolichyl-diphosphooligosaccharide protein glycosyltransferase subunit 1 |
| Q9ES21 | Phosphatidylinositol phosphatase SAC1                                   |
| D3ZU83 | Endoplasmic reticulum-Golgi intermediate compartment 3                  |
| D3ZLT7 | Uncharacterized protein KIAA2013                                        |
| Q9Z2L0 | Voltage-dependent anion-selective channel protein 1                     |
| P25235 | Dolichyl-diphosphooligosaccharide protein glycosyltransferase subunit 2 |
| B2RZD1 | Protein transport protein Sec61 subunit beta                            |
| P11442 | Clathrin heavy chain 1                                                  |
| Q6QBQ4 | Phospholipid scramblase 3                                               |
| Q5PPL3 | Sterol-4-alpha-carboxylate 3-dehydrogenase decarboxylating              |
| P12075 | Cytochrome c oxidase subunit 5B mitochondrial                           |
| P11951 | Cytochrome c oxidase subunit 6C2                                        |
| Q05030 | Platelet-derived growth factor receptor beta                            |
| P61107 | Ras-related protein Rab-14                                              |
| Q6TEK4 | Vitamin K epoxide reductase complex subunit 1                           |
| Q05962 | ADP/ATP translocase 1                                                   |
| Q6PCU4 | Emerin                                                                  |

|        |                                                                          |
|--------|--------------------------------------------------------------------------|
| P61972 | Nuclear transport factor 2                                               |
| Q5PQL7 | Integral membrane protein 2C                                             |
| P49134 | Integrin beta 1                                                          |
| B2RYD7 | STT3B, catalytic subunit of the oligosaccharyltransferase complex        |
| E9PU78 | Isoform Bcl-X(S) of Bcl-2-like protein 1                                 |
| P31044 | Phosphatidylethanolamine-binding protein 1                               |
| Q5RJR8 | Leucine-rich repeat-containing protein 59                                |
| F1M790 | Prostaglandin F2 receptor negative regulator                             |
| O35532 | Methylsterol monooxygenase 1                                             |
| Q6MGB4 | H2-K region expressed gene 4, rat orthologue                             |
| Q5XIL2 | Phosphatidylinositol 4-kinase type 2-beta                                |
| Q63269 | Inositol 1,4,5-trisphosphate receptor type 3                             |
| G3V7M2 | Integrin beta 7                                                          |
| Q6AYF6 | Glycosyltransferase 8 domain-containing protein 1                        |
| G3V6P8 | Guanine nucleotide-binding protein gamma-12                              |
| B1WBW4 | Armadillo repeat-containing protein 10                                   |
| Q04970 | GTPase NRas                                                              |
| B2RZB3 | Eva-1 homolog B                                                          |
| D3ZNG3 | Signal peptide peptidase-like 2A                                         |
| Q9Z1J7 | Amino acid transporter                                                   |
| Q9WUD2 | Transient receptor potential cation channel subfamily V member 2 (TRPV2) |
| E9PTW1 | Secretory carrier-associated membrane protein                            |
| F1LSN4 | Fibroblast growth factor receptor                                        |
| G3V9N9 | alpha-1,2-Mannosidase                                                    |
| G3V608 | Interleukin-3 receptor subunit beta                                      |
| Q6MGA3 | Antigen peptide transporter 2                                            |
| Q794F9 | 4F2 cell-surface antigen heavy chain                                     |
| Q64232 | Very-long-chain enoyl-CoA reductase                                      |
| Q6P791 | Ragulator complex protein LAMTOR1                                        |
| F1LNT8 | VAMP8                                                                    |
| F1M6W2 | Endoplasmic reticulum metallopeptidase 1                                 |
| Q5U2V8 | ER membrane protein complex subunit 3                                    |
| G3V7N6 | Lysophospholipid acyltransferase 7                                       |
| P61227 | Ras-related protein Rap-2b                                               |
| D4A0W1 | ER membrane protein complex subunit 4                                    |
| P62909 | 40S ribosomal protein S3                                                 |
| O35796 | Complement component 1 Q subcomponent-binding protein mitochondrial      |
| D3ZUD8 | Transmembrane 9 superfamily member 3                                     |
| Q63377 | Sodium/potassium-transporting ATPase subunit beta-3                      |
| Q95II0 | MHC class Ib antigen                                                     |
| M0RBJ0 | Guanine nucleotide-binding protein gamma-2                               |
| Q63942 | Ras-related protein Rab-3d                                               |
| Q63584 | Transmembrane emp24 domain-containing protein 10                         |
| Q5PQM0 | Transmembrane protein 168                                                |

|        |                                                                            |
|--------|----------------------------------------------------------------------------|
| Q6EV76 | Alpha-(1,6)-fucosyltransferase                                             |
| F1LU48 | Endoplasmic reticulum-golgi intermediate compartment 1                     |
| D3ZWZ1 | Integrin alpha X                                                           |
| B2RYF6 | Cleft lip and palate associated transmembrane protein 1                    |
| F1M779 | Clathrin heavy chain                                                       |
| P32551 | Cytochrome b-c1 complex subunit 2 mitochondrial                            |
| POC1Q3 | Lysophosphatidylcholine acyltransferase 2                                  |
| B0BN52 | Mitochondrial carrier homolog 2                                            |
| E9PTX9 | Solute carrier family 12 member 2                                          |
| P61621 | SEC61 alpha-1                                                              |
| B1WC67 | Solute carrier family 25 member 24                                         |
| F1LRK1 | Sodium/potassium-transporting ATPase subunit alpha                         |
| F1M1U0 | Matrix remodeling associated 7                                             |
| Q7TSA0 | Mitochondrial Rho GTPase 2                                                 |
| P61805 | Dolichyl-diphosphooligosaccharide protein glycosyltransferase subunit DAD1 |
| P53987 | Monocarboxylate transporter 1                                              |
| Q5XIN6 | Mitochondrial proton/calcium exchanger protein                             |
| P20788 | Cytochrome b-c1 complex subunit Rieske                                     |
| G3V6N2 | Transmembrane emp24 domain-containing protein 4                            |
| Q62902 | Lectin mannose-binding 1                                                   |
| O88813 | Long chain fatty acid CoA ligase 5                                         |
| P28494 | Alpha-mannosidase 2                                                        |
| O89035 | Solute carrier family 25 member 10                                         |
| P61131 | Beta-galactoside alpha-2,3-sialyltransferase 4                             |
| P50399 | Rab GDP dissociation inhibitor beta                                        |
| Q9WVB1 | Ras-related protein Rab-6a                                                 |
| Q4V8N6 | Solute carrier organic anion transporter family member 2A1                 |
| Q05175 | Brain acid soluble protein 1                                               |
| M0R402 | Protein disulfide-isomerase TMX3                                           |
| Q62839 | Golgin subfamily A member 2                                                |
| Q7TP42 | Translocation protein SEC62                                                |
| Q68FV6 | Glycosylated lysosomal membrane protein                                    |
| Q5U316 | Ras-related protein Rab-35                                                 |
| Q68FV1 | Trimeric intracellular cation channel type B (TRIC-B)                      |
| P11167 | Solute carrier family 2, facilitated glucose transporter member 1          |
| P31399 | ATP synthase subunit D mitochondrial                                       |
| G3V8L7 | Integrin alpha M                                                           |
| D4A4J3 | Alpha-mannosidase 2x                                                       |
| O35509 | Ras-related protein Rab-11b                                                |
| D4A0Y9 | Phosphatidylcholine translocator ABCB4                                     |
| P70580 | Membrane-associated progesterone receptor component 1                      |
| D4ABY2 | Coatomer subunit gamma 2                                                   |
| Q3T1J1 | Eukaryotic translation initiation factor 5A-1                              |
| Q66HA6 | ADP-ribosylation factor-like protein 8B                                    |



|        |                                                                     |
|--------|---------------------------------------------------------------------|
| G3V6T1 | Coatomer subunit alpha                                              |
| F1LP82 | Ras-related protein Rab-2a                                          |
| Q62636 | Ras-related protein Rap-1b                                          |
| Q5XIP2 | GPI-anchor transamidase                                             |
| Q3MIE4 | Synaptic vesicle membrane protein VAT-1 homolog                     |
| Q6P742 | Proteolipid protein 2                                               |
| D4ACG2 | Acetolactate synthase-like protein                                  |
| G3V7I3 | Manganese-transporting ATPase 13A1                                  |
| P62815 | V-type proton ATPase subunit B                                      |
| Q5M9I5 | Cytochrome b-c1 complex subunit 6 mitochondrial                     |
| P23347 | Anion exchange protein 2                                            |
| Q9Z122 | Acyl-CoA 6-desaturase                                               |
| Q4KLL4 | Transmembrane 9 superfamily member 4                                |
| Q5XIP9 | Transmembrane protein 43 (Protein LUMA)                             |
| Q9JID2 | Guanine nucleotide-binding protein alpha-11                         |
| Q63198 | Contactin 1                                                         |
| Q9Z2J5 | VAMP5                                                               |
| A3RLA8 | Low affinity immunoglobulin gamma Fc region receptor II             |
| P10719 | ATP synthase subunit beta mitochondrial                             |
| Q0R3W9 | GTPase, IMAP family member 1                                        |
| G3V741 | Solute carrier family 25 member 3                                   |
| D3ZLC4 | Slc2a6 protein                                                      |
| Q925S8 | ATP-dependent zinc metalloprotease YME1L1                           |
| O88941 | Mannosyl-oligosaccharide glucosidase                                |
| O54980 | Synaptogyrin-2                                                      |
| Q3B7U9 | Peptidyl-prolyl cis-trans isomerase FKBP8                           |
| Q5XI04 | Erythrocyte band 7 integral membrane protein                        |
| F1LQ92 | Sel-1 homolog 1                                                     |
| Q4V7D1 | Translocon-associated protein subunit alpha                         |
| D4AA91 | Ceramide synthase 5                                                 |
| P22734 | Catechol O-methyltransferase                                        |
| F1LM93 | Tyrosine-protein kinase Yes                                         |
| Q2YDU8 | Protein spinster homolog 1                                          |
| Q63083 | Nucleobindin-1                                                      |
| Q63085 | Cyclic GMP-inhibited phosphodiesterase B                            |
| Q63081 | Protein disulfide-isomerase A6                                      |
| Q62940 | E3 ubiquitin-protein ligase NEDD4                                   |
| Q63803 | Guanine nucleotide-binding protein G(s) subunit alpha isoforms XLas |
| Q6P6U0 | Tyrosine-protein kinase Fgr                                         |
| Q5EAI6 | Inhibitor kappa-B kinase-interacting protein                        |
| D4A5K6 | Zinc metallopeptidase STE24                                         |
| P00388 | NADPH--cytochrome P450 reductase                                    |
| P13838 | Leukosialin                                                         |
| Q06647 | ATP synthase subunit O mitochondrial                                |

|        |                                                                        |
|--------|------------------------------------------------------------------------|
| Q505J9 | ATPase family AAA domain-containing protein 1                          |
| Q6PEC3 | Protein YIF1B                                                          |
| G3V8I4 | Syntaxin-4A                                                            |
| Q68FY0 | Cytochrome b-c1 complex subunit 1 mitochondrial                        |
| F1LMK0 | A-kinase anchoring protein 1 isoform 2                                 |
| G3V679 | Transferrin receptor protein 1                                         |
| P29995 | Inositol 1,4,5-trisphosphate receptor type 2                           |
| Q4FZT0 | Stomatin-like protein 2                                                |
| Q5XIE8 | Integral membrane protein 2B                                           |
| Q9JHE5 | Sodium-coupled neutral amino acid transporter 2                        |
| Q3SWT0 | Platelet endothelial cell adhesion molecule (Pecam1)                   |
| Q99N01 | Organic anion-transporting polypeptide E                               |
| Q6IN10 | Endothelin-converting enzyme 1 Isoform                                 |
| F1M0J3 | Sodium bicarbonate cotransporter 3, isophorm 4                         |
| P16391 | RT1 class I histocompatibility antigen AA alpha chain                  |
| Q91Y81 | Septin-2                                                               |
| P70550 | Ras-related protein Rab-8b                                             |
| Q99P74 | Ras-related protein Rab-27b                                            |
| Q99P75 | Ras-related protein Rab-9a                                             |
| Q2IBC7 | Hepatocyte growth factor receptor                                      |
| Q2I6B2 | V-type proton ATPase subunit A1                                        |
| G3V8G5 | Golgi apparatus protein 1                                              |
| Q2I6B1 | V-type proton ATPase subunit A2                                        |
| Q09326 | Alpha-1,6-mannosyl-glycoprotein 2-beta-N-acetylglucosaminyltransferase |
| F1LMM5 | Arachidonate 5-lipoxygenase                                            |
| P05712 | Ras-related protein Rab-2a                                             |
| P62836 | Ras-related protein Rap-1a                                             |
| P62243 | 40S ribosomal protein S8                                               |
| Q01827 | Vesicular amine transporter 2                                          |
| Q5BJK8 | Golgi integral membrane protein 4                                      |
| P36370 | Antigen peptide transporter 1                                          |
| P82995 | Heat shock protein HSP 90-alpha                                        |
| P42667 | SEC11 homolog A                                                        |
| Q9JM53 | Apoptosis-inducing factor 1                                            |
| G3V8F5 | Mitochondrial import receptor subunit TOM40 homolog                    |
| Q5XID0 | Protein YIPF5                                                          |
| P05708 | Hexokinase-1                                                           |
| D3ZKE6 | Sarcolemmal membrane-associated protein                                |
| G3V667 | Integrin alpha 6                                                       |
| P13386 | High affinity immunoglobulin epsilon receptor subunit beta             |
| D3ZMM8 | Solute carrier family 7 member 6                                       |
| B4F7C9 | STT3A, catalytic subunit of the oligosaccharyltransferase complex      |
| Q5HZY0 | Erasin                                                                 |
| Q6RUV5 | Ras-related C3 botulinum toxin substrate 1 (Rac1)                      |

|        |                                                                      |
|--------|----------------------------------------------------------------------|
| Q5XID7 | Armadillo repeat-containing X-linked protein 3                       |
| P82471 | Guanine nucleotide-binding protein G(q) subunit alpha                |
| P58405 | Striatin-3                                                           |
| Q6MG61 | Chloride intracellular channel protein 1                             |
| Q498C8 | Protein RER1                                                         |
| D4A2Z6 | Translocation protein SEC63 homolog                                  |
| F1LMG7 | Leucine-rich repeat-containing protein 7                             |
| P11240 | Cytochrome c oxidase subunit 5A mitochondrial                        |
| E9PU37 | Palmitoyltransferase                                                 |
| P10252 | CD48 antigen                                                         |
| Q3KRE0 | ATPase family AAA domain-containing protein 3                        |
| P04166 | Cytochrome b5 type B                                                 |
| Q5U2X6 | Coiled-coil domain-containing protein 47                             |
| P63095 | Guanine nucleotide-binding protein G(s) subunit alpha                |
| Q5XIK2 | Thioredoxin-related transmembrane protein 2                          |
| P20291 | Arachidonate 5-lipoxygenase-activating protein                       |
| D4A1D8 | Surfeit 4                                                            |
| D4A7Y9 | Essential MCU regulator, mitochondrial                               |
| B2GV71 | NADH dehydrogenase [ubiquinone] 1 alpha subcomplex assembly factor 5 |
| Q5PQX1 | Torsin-1A-interacting protein 1                                      |
| Q6P9V1 | CD81 molecule                                                        |
| Q63635 | Syntaxin-6                                                           |
| Q5RJM1 | 3-oxo-5-alpha-steroid 4-dehydrogenase 3                              |
| Q09073 | ADP/ATP translocase 2                                                |
| Q6AYA5 | Transmembrane protein 106 B                                          |
| P54921 | Alpha-soluble NSF attachment protein (SNAP-alpha)                    |
| P09626 | Potassium-transporting ATPase alpha chain 1                          |
| G3V8C4 | Chloride intracellular channel protein 4                             |
| Q497A2 | Solute carrier family 35 member B2                                   |
| P09527 | Ras-related protein Rab-7a                                           |
| P29419 | ATP synthase subunit E mitochondrial                                 |
| P10888 | Cytochrome c oxidase subunit 4 isoform 1 mitochondrial               |
| Q66HG5 | Transmembrane 9 superfamily member 2                                 |
| Q5U2Z8 | Elongation of very long chain fatty acids protein 1                  |
| Q63524 | Transmembrane emp24 domain-containing protein 2                      |
| Q5SGE0 | Leucine-rich PPR motif-containing protein mitochondrial              |
| Q66HG9 | Mitochondrial antiviral-signaling protein                            |
| P23640 | Ras-related protein Rab-27a                                          |
| Q4V8F3 | Rhomboid-related protein 4                                           |
| Q6MG55 | Abhydrolase domain containing 16A                                    |
| P62747 | Rho-related GTP-binding protein RhoB                                 |
| O70595 | ATP-binding cassette sub-family B member 6                           |
| Q4AEF8 | Coatomer subunit gamma 1                                             |
| M0RAU0 | Advanced glycosylation end product-specific receptor                 |

|        |                                                                         |
|--------|-------------------------------------------------------------------------|
| P20171 | GTPase HRas                                                             |
| B5DF51 | Membrane magnesium transporter 1                                        |
| P04157 | Receptor-type tyrosine-protein phosphatase C (CD45)                     |
| G3V7A5 | Low density lipoprotein receptor isoform                                |
| Q66HF2 | Transmembrane 9 superfamily member 1                                    |
| Q66HF1 | NADH-ubiquinone oxidoreductase 75 kDa subunit mitochondrial             |
| P20070 | NADH-cytochrome b5 reductase 3                                          |
| Q5XIH7 | Prohibitin 2                                                            |
| Q5BQE6 | Delta(24)-sterol reductase                                              |
| D3ZP98 | Minor histocompatibility antigen H13                                    |
| P85007 | Immediate early response 3-interacting protein 1                        |
| Q642A2 | Type-1 angiotensin II receptor-associated protein                       |
| Q4G002 | Histocompatibility 2 T region locus 24                                  |
| Q6AZ61 | Probable lysosomal cobalamin transporter                                |
| Q00238 | Intercellular adhesion molecule 1 (ICAM1)                               |
| Q5M843 | 2-oxoglutarate and iron-dependent oxygenase domain-containing protein 3 |
| D3ZMR1 | Translocase of outer mitochondrial membrane 7                           |
| Q6AY20 | Cation-dependent mannose-6-phosphate receptor                           |
| D3ZIP8 | Endonuclease domain containing 1                                        |
| B0BNG3 | Vesicular integral-membrane protein VIP36                               |
| P97546 | Neuroplastin                                                            |
| F1M391 | Stimulator of interferon genes protein                                  |
| P35355 | Prostaglandin G/H synthase 2                                            |
| Q5M7T4 | Protein YIPF4                                                           |
| Q5I0H4 | Calcium load-activated calcium channel (CLAC channel)                   |
| Q6AXT5 | Ras-related protein Rab-21                                              |
| D4A376 | Ras-related protein Rab-12                                              |
| D3ZJ32 | Extended synaptotagmin 2                                                |
| Q6NYB7 | Ras-related protein Rab-1a                                              |
| P19511 | ATP synthase F(0) complex subunit B1 mitochondrial                      |
| G3V8Z1 | Linker for activation of T-cells family member 2 (NTAL)                 |
| P19814 | Trans-Golgi network integral membrane protein TGN38                     |
| Q76GL9 | Neutral amino acid transporter A                                        |
| P84903 | Stromal interaction molecule 1 (STIM1)                                  |
| P63245 | Receptor of activated protein C kinase 1 (RACK1)                        |
| Q8SEZ5 | Cytochrome c oxidase subunit 2                                          |
| A1L134 | Ancient ubiquitous protein 1                                            |
| Q4KM74 | Vesicle-trafficking protein SEC22b                                      |
| P35171 | Cytochrome c oxidase subunit 7A2                                        |
| D3ZD11 | Signal peptidase complex subunit 2                                      |
| Q6AXS4 | Renin receptor                                                          |
| D3ZM19 | Protein EVI2B                                                           |
| P45592 | Cofilin-1                                                               |
| Q01621 | Tyrosine-protein kinase LCK                                             |

|        |                                                                   |
|--------|-------------------------------------------------------------------|
| Q6AXN3 | Transmembrane emp24 domain-containing protein 5                   |
| F1LZX9 | Integrin alpha 5                                                  |
| D3ZF12 | Signal peptidase complex subunit 3                                |
| Q5FVQ4 | Malectin                                                          |
| O35142 | Coatomer subunit beta 2                                           |
| Q9JJ19 | Na(+)/H(+) exchange regulatory cofactor NHE-RF1                   |
| Q4V8C2 | Centromere/kinetochore protein zw10 homolog                       |
| Q9JJ05 | Glycoprotein-N-acetylgalactosamine 3-beta-galactosyltransferase 1 |
| P08753 | Guanine nucleotide-binding protein G(k) subunit alpha             |
| D4AD37 | Inositol monophosphatase 3                                        |
| D4AAL4 | Adhesion G protein-coupled receptor L3                            |
| P97675 | Ectonucleotide pyrophosphatase/phosphodiesterase family member 3  |
| O35152 | BET1-like protein                                                 |
| Q5XIA8 | Growth hormone-inducible transmembrane protein                    |
| Q5M7W6 | Protein FAM234A                                                   |
| P35289 | Ras-related protein Rab-15                                        |
| G3V6W2 | Prolactin regulatory element-binding protein                      |
| Q4FZX7 | Signal recognition particle receptor beta                         |
| P63018 | Heat shock cognate 71 kDa protein                                 |
| Q5XIA1 | Nicalin                                                           |
| P63012 | Ras-related protein Rab-3a                                        |
| Q5RKI8 | ATP-binding cassette sub-family B member 8                        |
| P35565 | Calnexin                                                          |
| F1LPK9 | Phosphatidylinositol glycan anchor biosynthesis class U protein   |
| Q9R0C5 | Polypeptide N-acetylgalactosaminyltransferase 7                   |
| D4ABI7 | Very-long-chain (3R)-3-hydroxyacyl-CoA dehydratase                |
| Q75Q41 | Mitochondrial import receptor subunit TOM22 homolog               |
| Q9Z1Z1 | Eukaryotic translation initiation factor 2-alpha kinase 3         |
| P17046 | Lysosome-associated membrane glycoprotein 2 (Lamp2)               |
| O70521 | Regulator of G-protein signaling 19                               |
| Q9Z2Z8 | 7-dehydrocholesterol reductase                                    |
| F1LNC4 | Vesicle transport through interaction with t-SNAREs homolog 1B    |
| Q9QYE7 | Integrin alpha D                                                  |
| G3V6D3 | ATP synthase subunit beta                                         |
| Q9WTR7 | SEC11 homolog C                                                   |
| Q6AXX5 | Retinol dehydrogenase 11                                          |
| P09456 | cAMP-dependent protein kinase type I-alpha regulatory subunit     |
| F1LX07 | Solute carrier family 25 member 12                                |
| P35435 | ATP synthase subunit gamma mitochondrial                          |
| D4AAE9 | CDGSH iron-sulfur domain-containing protein 2                     |
| Q08163 | Adenylyl cyclase-associated protein 1                             |
| P26453 | Basigin                                                           |
| Q5RKJ9 | Ras-related protein Rab-10                                        |
| BOBNL4 | Heme transporter HRG1                                             |

|        |                                                                   |
|--------|-------------------------------------------------------------------|
| Q07647 | Solute carrier family 2, facilitated glucose transporter member 3 |
| Q8CGU6 | Nicastrin                                                         |
| O70601 | Linker for activation of T-cells family member 1 (LAT)            |
| A0JN29 | Lunapark ER junction formation factor                             |
| Q6IRF8 | V-type proton ATPase subunit S1                                   |
| P00507 | Aspartate aminotransferase mitochondrial                          |
| M0RC99 | Ras-related protein Rab-5a                                        |
| D3ZF54 | Anoctamin-10                                                      |
| P35952 | Low-density lipoprotein receptor                                  |
| Q9Z1X1 | Extended synaptotagmin 1                                          |
| P84817 | Mitochondrial fission 1 protein                                   |
| Q9JK11 | Reticulon-4                                                       |
| P14562 | Lysosome-associated membrane glycoprotein 1 (Lamp1)               |
| Q91ZQ0 | Vacuole membrane protein 1                                        |
| Q6AXV4 | Sorting and assembly machinery component 50 homolog               |
| Q6P7D4 | Cytochrome P450 20A1                                              |
| D3ZP13 | Sulfhydryl oxidase 2                                              |
| Q9Z1E1 | Flotillin-1                                                       |
| Q6IMF3 | Keratin, type II cytoskeletal 1                                   |
| P63025 | VAMP3                                                             |
| D3ZFK5 | Signal peptidase complex subunit 1                                |
| Q5FVN0 | Lysophospholipid acyltransferase 5                                |
| P19234 | NADH dehydrogenase [ubiquinone] flavoprotein 2 mitochondrial      |
| Q499P3 | C1GALT1-specific chaperone 1                                      |
| P19627 | Guanine nucleotide-binding protein G(z) subunit alpha             |
| P23514 | Coatomer subunit beta 1                                           |
| Q99JC6 | Tapasin                                                           |
| P35280 | Ras-related protein Rab-8a                                        |

| ID Term            | GO Term             | Fold Enriched | Count                                                 | <i>p</i> -value | FDR     |
|--------------------|---------------------|---------------|-------------------------------------------------------|-----------------|---------|
| UP_KEYWORDS        | TRANSMEMBRANE HELIX | 1.28          | 357                                                   | 3.48E-8         | 4.73E-5 |
| Annotated proteins |                     |               |                                                       |                 |         |
| Protein Accession  |                     |               | Protein Identification                                |                 |         |
| Q62720             |                     |               | Zinc transporter 1                                    |                 |         |
| D4A017             |                     |               | Transmembrane protein 87 A                            |                 |         |
| Q10473             |                     |               | Polypeptide N-acetylgalactosaminyltransferase 1       |                 |         |
| D3ZAF6             |                     |               | ATP synthase subunit F mitochondrial                  |                 |         |
| Q5BK85             |                     |               | Transmembrane emp24 domain-containing protein 1       |                 |         |
| Q5XIU9             |                     |               | Membrane-associated progesterone receptor component 2 |                 |         |
| B5DEH2             |                     |               | Erlin-2                                               |                 |         |
| Q62876             |                     |               | Synaptogyrin-1                                        |                 |         |
| Q6PEC3             |                     |               | Protein YIF1B                                         |                 |         |

|        |                                                                   |
|--------|-------------------------------------------------------------------|
| Q5XIU4 | B-cell receptor-associated protein 29                             |
| Q0H8B9 | C-type lectin domain family 2 member D11                          |
| G3V8I4 | Syntaxin-4A                                                       |
| F1LMK0 | A-kinase anchoring protein 1 isoform 2                            |
| Q6AYM8 | Glycosylphosphatidylinositol anchor attachment 1                  |
| B0BN02 | Metaxin 1                                                         |
| D3ZTX0 | Transmembrane emp24 domain-containing protein 7                   |
| G3V679 | Transferrin receptor protein 1                                    |
| P06686 | Sodium/potassium-transporting ATPase subunit alpha-2              |
| F1MA50 | transmembrane protein 123                                         |
| P06687 | Sodium/potassium-transporting ATPase subunit alpha-3              |
| P29995 | Inositol 1,4,5-trisphosphate receptor type 2                      |
| P06685 | Sodium/potassium-transporting ATPase subunit alpha-1              |
| D3ZAS9 | DDR GK domain containing 1                                        |
| Q641Y0 | Oligosaccharyl transferase 48 kDa subunit                         |
| Q5XIE8 | Integral membrane protein 2B                                      |
| Q66H15 | Regulator of microtubule dynamics protein 3                       |
| Q5XI52 | Vezatin                                                           |
| Q62733 | Lamina-associated polypeptide 2 isoform beta                      |
| Q9JHE5 | Sodium-coupled neutral amino acid transporter 2                   |
| Q9Z270 | VAMP-associated protein A                                         |
| Q6AYN2 | Store-operated calcium entry-associated regulatory factor (SARAF) |
| G3V6H5 | Solute carrier family 25 member 11                                |
| Q66H18 | Synaptophysin-like 1                                              |
| Q10468 | Beta-1,4 N-acetylgalactosaminyltransferase 1                      |
| Q3SWT0 | Platelet endothelial cell adhesion molecule (Pecam1)              |
| Q99N01 | Organic anion-transporting polypeptide E                          |
| Q66H50 | Fatty acyl-CoA reductase 1                                        |
| Q6IN10 | Endothelin-converting enzyme 1 Isoform                            |
| G3V9U7 | Sarcoplasmic/endoplasmic reticulum calcium ATPase 3 (SERCA3)      |
| F1M0J3 | Sodium bicarbonate cotransporter 3, isophorm 4                    |
| Q9ES40 | PRA1 family protein 3                                             |
| Q9Z269 | VAMP-associated protein B                                         |
| Q5FVF4 | Transmembrane 7 superfamily member 3                              |
| Q4V888 | Type 2 phosphatidylinositol 4,5-bisphosphate 4-phosphatase        |
| P20411 | High affinity immunoglobulin epsilon receptor subunit gamma       |
| P16391 | RT1 class I histocompatibility antigen AA alpha chain             |
| F1M5Z5 | Anoctamin-6                                                       |
| Q62896 | Bet1 golgi vesicular membrane trafficking protein                 |
| P51796 | Chloride intracellular channel protein 5                          |
| O88884 | A-kinase anchor protein 1, mitochondrial                          |
| Q2IBC7 | Hepatocyte growth factor receptor                                 |
| Q5XI41 | Translocating chain-associated membrane protein 1                 |
| Q2I6B2 | V-type proton ATPase subunit A1                                   |

|        |                                                                        |
|--------|------------------------------------------------------------------------|
| P27615 | Lysosome membrane protein 2 (CD36)                                     |
| G3V8G5 | Golgi apparatus protein 1                                              |
| A1L1L6 | Mitochondrial Rho GTPase 1                                             |
| Q09326 | Alpha-1,6-mannosyl-glycoprotein 2-beta-N-acetylglucosaminyltransferase |
| Q2I6B1 | V-type proton ATPase subunit A2                                        |
| Q9QYV0 | Disintegrin and metalloproteinase domain-containing protein 15         |
| B5DFJ2 | Protein FAM3A                                                          |
| Q66H21 | Cholinephosphotransferase 1                                            |
| G3V878 | Signal peptidase complex catalytic subunit SEC11                       |
| B0K020 | CDGSH iron-sulfur domain-containing protein 1                          |
| D3ZYM4 | Macrophage stimulating 1 receptor                                      |
| P32089 | Citrate transport protein                                              |
| D4A416 | Cleft lip and palate transmembrane protein 1-like protein              |
| Q4V899 | Transmembrane protein 165                                              |
| Q861Q1 | MHC class I antigen                                                    |
| M0RCF3 | Integrin beta 3                                                        |
| G3V8V4 | Ceramide synthase 2                                                    |
| Q1WIM3 | Cell adhesion molecule 3                                               |
| Q01827 | Vesicular amine transporter 2                                          |
| Q3KR86 | MICOS complex subunit Mic60                                            |
| P97887 | Presenilin-1                                                           |
| Q5XI31 | GPI transamidase component PIG-S                                       |
| Q5BJK8 | Golgi integral membrane protein 4                                      |
| P36370 | Antigen peptide transporter 1                                          |
| Q62611 | Interleukin 1 receptor-like 1                                          |
| P42667 | SEC11 homolog A                                                        |
| Q9JM53 | Apoptosis-inducing factor 1                                            |
| O88994 | Mitochondrial amidoxime reducing component 2                           |
| Q5BJZ3 | Nicotinamide nucleotide transhydrogenase                               |
| Q5XI36 | CD97                                                                   |
| G3V887 | V-type proton ATPase subunit A                                         |
| Q5XID0 | Protein YIPF5                                                          |
| D3ZKE6 | Sarcolemmal membrane-associated protein                                |
| G3V667 | Integrin alpha 6                                                       |
| P13386 | High affinity immunoglobulin epsilon receptor subunit beta             |
| M0RDI5 | Mitochondrial calcium uniporter                                        |
| D3ZMM8 | Solute carrier family 7 member 6                                       |
| B4F7C9 | STT3A, catalytic subunit of the oligosaccharyltransferase complex      |
| Q5XID7 | Armadillo repeat-containing X-linked protein 3                         |
| Q64578 | Sarcoplasmic/endoplasmic reticulum calcium ATPase 1 (SERCA1)           |
| Q6MG61 | Chloride intracellular channel protein 1                               |
| G3V9X8 | Magnesium transporter protein 1                                        |
| Q498C8 | Protein RER1                                                           |
| D3ZD83 | Major facilitator superfamily domain-containing protein 10             |



|        |                                                           |
|--------|-----------------------------------------------------------|
| D4A2Z6 | Translocation protein SEC63 homolog                       |
| D4A533 | Transmembrane anterior posterior transformation protein 1 |
| Q6AYQ4 | Transmembrane protein 109                                 |
| Q64541 | Sodium/potassium-transporting ATPase subunit alpha-4      |
| E9PU37 | Palmitoyltransferase                                      |
| O08984 | Lamin-B receptor                                          |
| Q5FVC4 | DnaJ (Hsp40) homolog subfamily B member 12                |
| O70257 | Syntaxin-7                                                |
| P51577 | P2X purinoceptor 4                                        |
| Q3KRE0 | ATPase family AAA domain-containing protein 3             |
| P04166 | Cytochrome b5 type B                                      |
| F7FNS3 | Derlin                                                    |
| O08775 | Vascular endothelial growth factor receptor 2             |
| Q80ZA5 | Sodium-driven chloride bicarbonate exchanger              |
| G3V7P1 | Syntaxin-12                                               |
| Q5U2X6 | Coiled-coil domain-containing protein 47                  |
| G3V9Y2 | Phospholipid phosphatase 1                                |
| Q5XIK2 | Thioredoxin-related transmembrane protein 2               |
| P20291 | Arachidonate 5-lipoxygenase-activating protein            |
| Q63016 | Large neutral amino acids transporter small subunit 1     |
| O35165 | Golgi SNAP receptor complex member 2                      |
| R9PXR4 | Mitochondrial import receptor subunit TOM70               |
| D4A1D8 | Surfeit 4                                                 |
| Q63116 | Mast/stem cell growth factor receptor                     |
| D4A7Y9 | Essential MCU regulator, mitochondrial                    |
| Q5PQX1 | Torsin-1A-interacting protein 1                           |
| Q64244 | ADP-ribosyl cyclase/cyclic ADP-ribose hydrolase 1         |
| Q6P9V1 | CD81 molecule                                             |
| B0BN30 | Mitochondrial carrier homolog 1                           |
| Q63635 | Syntaxin-6                                                |
| O88777 | Presenilin-2                                              |
| Q5RJM1 | 3-oxo-5-alpha-steroid 4-dehydrogenase 3                   |
| Q09073 | ADP/ATP translocase 2                                     |
| Q5I0E7 | Transmembrane emp24 domain-containing protein 9           |
| Q9Z2Q7 | Syntaxin-8                                                |
| Q6AYA5 | Transmembrane protein 106 B                               |
| Q64654 | Lanosterol 14-alpha demethylase                           |
| Q63965 | Sideroflexin-1                                            |
| A1L1J9 | Lipase maturation factor 2                                |
| F1M7T6 | Translocon-associated protein subunit gamma               |
| P09626 | Potassium-transporting ATPase alpha chain 1               |
| G3V8C4 | Chloride intracellular channel protein 4                  |
| F1LQR8 | Inositol 1,4,5-trisphosphate receptor type 2              |
| Q497A2 | Solute carrier family 35 member B2                        |

|        |                                                                         |
|--------|-------------------------------------------------------------------------|
| F1LZW6 | Solute carrier family 25 member 13                                      |
| Q08849 | Syntaxin-3                                                              |
| Q8CHN6 | Sphingosine-1-phosphate lyase 1                                         |
| Q66HG5 | Transmembrane 9 superfamily member 2                                    |
| F6T9E7 | P-selectin glycoprotein ligand 1                                        |
| Q08851 | Syntaxin-5                                                              |
| Q63151 | Long chain fatty acid CoA ligase 3                                      |
| Q5U2Z8 | Elongation of very long chain fatty acids protein 1                     |
| P58195 | Phospholipid scramblase 1                                               |
| Q9JHW5 | VAMP7                                                                   |
| Q63524 | Transmembrane emp24 domain-containing protein 2                         |
| D4A2H2 | Serine palmitoyltransferase 1                                           |
| D3ZV75 | Major facilitator superfamily domain-containing protein 1               |
| Q66HG9 | Mitochondrial antiviral-signaling protein                               |
| F1LNX2 | Calcium release-activated calcium channel protein 1 (Orai1)             |
| Q4V8F3 | Rhomboid-related protein 4                                              |
| Q6MG55 | Abhydrolase domain containing 16A                                       |
| D3ZIJ5 | Dolichyl-phosphate mannosyltransferase subunit 3                        |
| O70595 | ATP-binding cassette sub-family B member 6                              |
| Q07984 | Translocon-associated protein subunit delta                             |
| M0RAU0 | Advanced glycosylation end product-specific receptor                    |
| B5DF51 | Membrane magnesium transporter 1                                        |
| Q63135 | Complement component receptor 1-like protein                            |
| M0RCA3 | Zinc finger protein-like 1                                              |
| P04157 | Receptor-type tyrosine-protein phosphatase C (CD45)                     |
| D3ZQG9 | RT1 class I locus CE4                                                   |
| G3V7A5 | Low density lipoprotein receptor isoform                                |
| Q52KJ9 | Thioredoxin-related transmembrane protein 1                             |
| Q64273 | Inward rectifier potassium channel 2                                    |
| Q66HF2 | Transmembrane 9 superfamily member 1                                    |
| B2RYB8 | Integrin beta 2                                                         |
| Q5HZE2 | Transmembrane protein 120 A                                             |
| Q5BQE6 | Delta(24)-sterol reductase                                              |
| D3ZP98 | Minor histocompatibility antigen H13                                    |
| D3ZU83 | Endoplasmic reticulum-Golgi intermediate compartment 3                  |
| Q9ES21 | Phosphatidylinositol phosphatase SAC1                                   |
| P07153 | Dolichyl-diphosphooligosaccharide protein glycosyltransferase subunit 1 |
| D3ZLT7 | Uncharacterized protein KIAA2013                                        |
| P25235 | Dolichyl-diphosphooligosaccharide protein glycosyltransferase subunit 2 |
| P85007 | Immediate early response 3-interacting protein 1                        |
| Q4G002 | Histocompatibility 2 T region locus 24                                  |
| Q642A2 | Type-1 angiotensin II receptor-associated protein                       |
| Q6AZ61 | Probable lysosomal cobalamin transporter                                |
| B2RZD1 | Protein transport protein Sec61 subunit beta                            |

|        |                                                                          |
|--------|--------------------------------------------------------------------------|
| Q5M843 | 2-oxoglutarate and iron-dependent oxygenase domain-containing protein 3  |
| Q00238 | Intercellular adhesion molecule 1 (ICAM1)                                |
| Q6QBO4 | Phospholipid scramblase 3                                                |
| D3ZMR1 | Translocase of outer mitochondrial membrane 7                            |
| Q5PPL3 | Sterol-4-alpha-carboxylate 3-dehydrogenase decarboxylating               |
| Q6AY20 | Cation-dependent mannose-6-phosphate receptor                            |
| P11951 | Cytochrome c oxidase subunit 6C2                                         |
| Q05030 | Platelet-derived growth factor receptor beta                             |
| Q6TEK4 | Vitamin K epoxide reductase complex subunit 1                            |
| D3ZIP8 | Endonuclease domain containing 1                                         |
| Q05962 | ADP/ATP translocase 1                                                    |
| Q6PCU4 | Emerin                                                                   |
| Q5PQL7 | Integral membrane protein 2C                                             |
| B0BNG3 | Vesicular integral-membrane protein VIP36                                |
| P49134 | Integrin beta 1                                                          |
| P97546 | Neuroplastin                                                             |
| B2RYD7 | STT3B, catalytic subunit of the oligosaccharyltransferase complex        |
| F1M391 | Stimulator of interferon genes protein                                   |
| E9PU78 | Isoform Bcl-X(S) of Bcl-2-like protein 1                                 |
| Q5M7T4 | Protein YIPF4                                                            |
| Q5I0H4 | Calcium load-activated calcium channel (CLAC channel)                    |
| Q5RJR8 | Leucine-rich repeat-containing protein 59                                |
| D3ZJ32 | Extended synaptotagmin 2                                                 |
| G3V8Z1 | Linker for activation of T-cells family member 2 (NTAL)                  |
| P19814 | Trans-Golgi network integral membrane protein TGN38                      |
| F1M790 | Prostaglandin F2 receptor negative regulator                             |
| Q76GL9 | Neutral amino acid transporter A                                         |
| O35532 | Methylsterol monooxygenase 1                                             |
| Q6MGB4 | H2-K region expressed gene 4, rat orthologue                             |
| Q63269 | Inositol 1,4,5-trisphosphate receptor type 3                             |
| G3V7M2 | Integrin beta 7                                                          |
| Q6AYF6 | Glycosyltransferase 8 domain-containing protein 1                        |
| P84903 | Stromal interaction molecule 1 (STIM1)                                   |
| Q8SEZ5 | Cytochrome c oxidase subunit 2                                           |
| A1L134 | Ancient ubiquitous protein 1                                             |
| Q4KM74 | Vesicle-trafficking protein SEC22b                                       |
| B1WBW4 | Armadillo repeat-containing protein 10                                   |
| P35171 | Cytochrome c oxidase subunit 7A2                                         |
| B2RZB3 | Eva-1 homolog B                                                          |
| D3ZNG3 | Signal peptide peptidase-like 2A                                         |
| Q9WUD2 | Transient receptor potential cation channel subfamily V member 2 (TRPV2) |
| Q9Z1J7 | Amino acid transporter                                                   |
| D3ZD11 | Signal peptidase complex subunit 2                                       |
| E9PTW1 | Secretory carrier-associated membrane protein                            |

|        |                                                                            |
|--------|----------------------------------------------------------------------------|
| F1LSN4 | Fibroblast growth factor receptor                                          |
| Q6AXS4 | Renin receptor                                                             |
| D3ZM19 | Protein EVI2B                                                              |
| G3V9N9 | alpha-1,2-Mannosidase                                                      |
| Q6MGA3 | Antigen peptide transporter 2                                              |
| G3V608 | Interleukin-3 receptor subunit beta                                        |
| Q794F9 | 4F2 cell-surface antigen heavy chain                                       |
| Q6AXN3 | Transmembrane emp24 domain-containing protein 5                            |
| F1LNT8 | VAMP8                                                                      |
| Q64232 | Very-long-chain enoyl-CoA reductase                                        |
| F1M6W2 | Endoplasmic reticulum metalloproteinase 1                                  |
| F1LZX9 | Integrin alpha 5                                                           |
| D3ZF12 | Signal peptidase complex subunit 3                                         |
| Q5U2V8 | ER membrane protein complex subunit 3                                      |
| G3V7N6 | Lysophospholipid acyltransferase 7                                         |
| Q5FVQ4 | Malectin                                                                   |
| D4A0W1 | ER membrane protein complex subunit 4                                      |
| D3ZUD8 | Transmembrane 9 superfamily member 3                                       |
| Q63377 | Sodium/potassium-transporting ATPase subunit beta-3                        |
| Q95II0 | MHC class Ib antigen                                                       |
| Q9JJ05 | Glycoprotein-N-acetylgalactosamine 3-beta-galactosyltransferase 1          |
| Q63584 | Transmembrane emp24 domain-containing protein 10                           |
| Q5PQM0 | Transmembrane protein 168                                                  |
| Q6EV76 | Alpha-(1,6)-fucosyltransferase                                             |
| F1LU48 | Endoplasmic reticulum-golgi intermediate compartment 1                     |
| D3ZWZ1 | Integrin alpha X                                                           |
| B2RYF6 | Cleft lip and palate associated transmembrane protein 1                    |
| P0C1Q3 | Lysophosphatidylcholine acyltransferase 2                                  |
| B0BN52 | Mitochondrial carrier homolog 2                                            |
| E9PTX9 | Solute carrier family 12 member 2                                          |
| P61621 | SEC61 alpha-1                                                              |
| B1WC67 | Solute carrier family 25 member 24                                         |
| F1LRK1 | Sodium/potassium-transporting ATPase subunit alpha                         |
| F1M1U0 | Matrix remodeling associated 7                                             |
| D4AD37 | Inositol monophosphatase 3                                                 |
| Q7TSA0 | Mitochondrial Rho GTPase 2                                                 |
| P61805 | Dolichyl-diphosphooligosaccharide protein glycosyltransferase subunit DAD1 |
| D4AAL4 | Adhesion G protein-coupled receptor L3                                     |
| P53987 | Monocarboxylate transporter 1                                              |
| Q5XIN6 | Mitochondrial proton/calcium exchanger protein                             |
| P20788 | Cytochrome b-c1 complex subunit Rieske                                     |
| G3V6N2 | Transmembrane emp24 domain-containing protein 4                            |
| P28494 | Alpha-mannosidase 2                                                        |
| O88813 | Long chain fatty acid CoA ligase 5                                         |

|        |                                                                   |
|--------|-------------------------------------------------------------------|
| P97675 | Ectonucleotide pyrophosphatase/phosphodiesterase family member 3  |
| Q62902 | Lectin mannose-binding 1                                          |
| P61131 | Beta-galactoside alpha-2,3-sialyltransferase 4                    |
| O89035 | Solute carrier family 25 member 10                                |
| O35152 | BET1-like protein                                                 |
| Q5XIA8 | Growth hormone-inducible transmembrane protein                    |
| Q4V8N6 | Solute carrier organic anion transporter family member 2A1        |
| Q5M7W6 | Protein FAM234A                                                   |
| G3V6W2 | Prolactin regulatory element-binding protein                      |
| Q4FZX7 | Signal recognition particle receptor beta                         |
| M0R402 | Protein disulfide-isomerase TMX3                                  |
| Q5XIA1 | Nicalin                                                           |
| Q5RKI8 | ATP-binding cassette sub-family B member 8                        |
| P35565 | Calnexin                                                          |
| Q7TP42 | Translocation protein SEC62                                       |
| F1LPK9 | Phosphatidylinositol glycan anchor biosynthesis class U protein   |
| Q68FV6 | Glycosylated lysosomal membrane protein                           |
| Q9R0C5 | Polypeptide N-acetylgalactosaminyltransferase 7                   |
| D4ABI7 | Very-long-chain (3R)-3-hydroxyacyl-CoA dehydratase                |
| Q68FV1 | Trimeric intracellular cation channel type B (TRIC-B)             |
| Q75Q41 | Mitochondrial import receptor subunit TOM22 homolog               |
| Q9Z1Z1 | Eukaryotic translation initiation factor 2-alpha kinase 3         |
| P11167 | Solute carrier family 2, facilitated glucose transporter member 1 |
| G3V8L7 | Integrin alpha M                                                  |
| D4A4J3 | Alpha-mannosidase 2x                                              |
| P17046 | Lysosome-associated membrane glycoprotein 2 (Lamp2)               |
| D4A0Y9 | Phosphatidylcholine translocator ABCB4                            |
| F1LNC4 | Vesicle transport through interaction with t-SNAREs homolog 1B    |
| Q9Z2Z8 | 7-dehydrocholesterol reductase                                    |
| Q9QYE7 | Integrin alpha D                                                  |
| P70580 | Membrane-associated progesterone receptor component 1             |
| Q9WTR7 | SEC11 homolog C                                                   |
| Q6AXX5 | Retinol dehydrogenase 11                                          |
| F1LX07 | Solute carrier family 25 member 12                                |
| D4AAE9 | CDGSH iron-sulfur domain-containing protein 2                     |
| P26453 | Basigin                                                           |
| B0BNL4 | Heme transporter HRG1                                             |
| Q6P742 | Proteolipid protein 2                                             |
| Q5XIP2 | GPI-anchor transamidase                                           |
| D4ACG2 | Acetolactate synthase-like protein                                |
| G3V7I3 | Manganese-transporting ATPase 13A1                                |
| P23347 | Anion exchange protein 2                                          |
| Q4KLL4 | Transmembrane 9 superfamily member 4                              |
| Q9Z122 | Acyl-CoA 6-desaturase                                             |

|        |                                                                   |
|--------|-------------------------------------------------------------------|
| Q5XIP9 | Transmembrane protein 43 (Protein LUMA)                           |
| Q07647 | Solute carrier family 2, facilitated glucose transporter member 3 |
| Q9Z2J5 | VAMP5                                                             |
| Q8CGU6 | Nicastrin                                                         |
| O70601 | Linker for activation of T-cells family member 1 (LAT)            |
| A3RLA8 | Low affinity immunoglobulin gamma Fc region receptor II           |
| A0JN29 | Lunapark ER junction formation factor                             |
| Q0R3W9 | GTPase, IMAP family member 1                                      |
| G3V741 | Solute carrier family 25 member 3                                 |
| Q6IRF8 | V-type proton ATPase subunit S1                                   |
| D3ZLC4 | Slc2a6 protein                                                    |
| Q925S8 | ATP-dependent zinc metalloprotease YME1L1                         |
| O88941 | Mannosyl-oligosaccharide glucosidase                              |
| O54980 | Synaptogyrin-2                                                    |
| Q3B7U9 | Peptidyl-prolyl cis-trans isomerase FKBP8                         |
| Q5XI04 | Erythrocyte band 7 integral membrane protein                      |
| D3ZF54 | Anoctamin-10                                                      |
| P35952 | Low-density lipoprotein receptor                                  |
| Q9Z1X1 | Extended synaptotagmin 1                                          |
| F1LQ92 | Sel-1 homolog 1                                                   |
| Q9JK11 | Reticulon-4                                                       |
| P84817 | Mitochondrial fission 1 protein                                   |
| Q4V7D1 | Translocon-associated protein subunit alpha                       |
| P14562 | Lysosome-associated membrane glycoprotein 1 (Lamp1)               |
| D4AA91 | Ceramide synthase 5                                               |
| P22734 | Catechol O-methyltransferase                                      |
| Q91ZQ0 | Vacuole membrane protein 1                                        |
| Q2YDU8 | Protein spinster homolog 1                                        |
| Q63085 | Cyclic GMP-inhibited phosphodiesterase B                          |
| Q6P7D4 | Cytochrome P450 20A1                                              |
| D3ZP13 | Sulfhydryl oxidase 2                                              |
| P63025 | VAMP3                                                             |
| D3ZFK5 | Signal peptidase complex subunit 1                                |
| Q5FVN0 | Lysophospholipid acyltransferase 5                                |
| Q499P3 | C1GALT1-specific chaperone 1                                      |
| Q5EAI6 | Inhibitor kappa-B kinase-interacting protein                      |
| D4A5K6 | Zinc metallopeptidase STE24                                       |
| Q99JC6 | Tapasin                                                           |
| P13838 | Leukosialin                                                       |
| P00388 | NADPH--cytochrome P450 reductase                                  |

**Annotation Cluster Enrichment Score: 4.17**

| ID Term            | GO Term                 | Fold Enriched | Count                                                       | <i>p</i> -value | FDR     |
|--------------------|-------------------------|---------------|-------------------------------------------------------------|-----------------|---------|
| GO:0043303         | MAST CELL DEGRANULATION | 6.01          | 13                                                          | 8.69E-7         | 1.70E-4 |
| Annotated proteins |                         |               |                                                             |                 |         |
| Protein Accession  |                         |               | Protein Identification                                      |                 |         |
| G3V8Z1             |                         |               | Linker for activation of T-cells family member 2 (NTAL)     |                 |         |
| P63102             |                         |               | 14-3-3 protein zeta/delta                                   |                 |         |
| P13386             |                         |               | High affinity immunoglobulin epsilon receptor subunit beta  |                 |         |
| Q07014             |                         |               | Tyrosine-protein kinase Lyn                                 |                 |         |
| F1LNT8             |                         |               | VAMP8                                                       |                 |         |
| O70601             |                         |               | Linker for activation of T-cells family member 1 (LAT)      |                 |         |
| Q63116             |                         |               | Mast/stem cell growth factor receptor                       |                 |         |
| P06762             |                         |               | Heme oxygenase 1                                            |                 |         |
| Q6P6U0             |                         |               | Tyrosine-protein kinase Fgr                                 |                 |         |
| Q9JHW5             |                         |               | VAMP7                                                       |                 |         |
| P63025             |                         |               | VAMP3                                                       |                 |         |
| P20411             |                         |               | High affinity immunoglobulin epsilon receptor subunit gamma |                 |         |
| O70377             |                         |               | Synaptosomal-associated protein 23 (SNAP-23)                |                 |         |

| ID Term            | GO Term                 | Fold Enriched | Count                                                       | <i>p</i> -value | FDR     |
|--------------------|-------------------------|---------------|-------------------------------------------------------------|-----------------|---------|
| GO:0043299         | LEUKOCYTE DEGRANULATION | 5.47          | 20                                                          | 5.33E-9         | 1.04E-5 |
| Annotated proteins |                         |               |                                                             |                 |         |
| Protein Accession  |                         |               | Protein Identification                                      |                 |         |
| Q91ZN1             |                         |               | Coronin-1A                                                  |                 |         |
| Q07014             |                         |               | Tyrosine-protein kinase Lyn                                 |                 |         |
| O70601             |                         |               | Linker for activation of T-cells family member 1 (LAT)      |                 |         |
| Q5U1Y2             |                         |               | Ras-related C3 botulinum toxin substrate 2 (Rac2)           |                 |         |
| Q63116             |                         |               | Mast/stem cell growth factor receptor                       |                 |         |
| G3V8I4             |                         |               | Syntaxin-4A                                                 |                 |         |
| P06762             |                         |               | Heme oxygenase 1                                            |                 |         |
| P63025             |                         |               | VAMP3                                                       |                 |         |
| G3V8Z1             |                         |               | Linker for activation of T-cells family member 2 (NTAL)     |                 |         |
| P63102             |                         |               | 14-3-3 protein zeta/delta                                   |                 |         |
| P13386             |                         |               | High affinity immunoglobulin epsilon receptor subunit beta  |                 |         |
| F1LNT8             |                         |               | VAMP8                                                       |                 |         |
| Q6P6U0             |                         |               | Tyrosine-protein kinase Fgr                                 |                 |         |
| Q9JHW5             |                         |               | VAMP7                                                       |                 |         |
| P14562             |                         |               | Lysosome-associated membrane glycoprotein 1 (Lamp1)         |                 |         |
| Q62753             |                         |               | Syntaxin-binding protein 2                                  |                 |         |
| P20411             |                         |               | High affinity immunoglobulin epsilon receptor subunit gamma |                 |         |
| O70377             |                         |               | Synaptosomal-associated protein 23 (SNAP-23)                |                 |         |

|        |                                     |
|--------|-------------------------------------|
| G3V637 | Syntaxin-binding protein 2, isoform |
| P23640 | Ras-related protein Rab-27a         |

| ID Term            | GO Term                                          | Fold Enriched | Count                                                       | <i>p</i> -value | FDR     |
|--------------------|--------------------------------------------------|---------------|-------------------------------------------------------------|-----------------|---------|
| GO:0002279         | MAST CELL ACTIVATION INVOLVED IN IMMUNE RESPONSE | 5.96          | 16                                                          | 1.02E-7         | 1.99E-4 |
| Annotated proteins |                                                  |               |                                                             |                 |         |
| Protein Accession  |                                                  |               | Protein Identification                                      |                 |         |
| Q07014             |                                                  |               | Tyrosine-protein kinase Lyn                                 |                 |         |
| O70601             |                                                  |               | Linker for activation of T-cells family member 1 (LAT)      |                 |         |
| Q5U1Y2             |                                                  |               | Ras-related C3 botulinum toxin substrate 2 (Rac2)           |                 |         |
| Q63116             |                                                  |               | Mast/stem cell growth factor receptor                       |                 |         |
| P06762             |                                                  |               | Heme oxygenase 1                                            |                 |         |
| P63025             |                                                  |               | VAMP3                                                       |                 |         |
| G3V8Z1             |                                                  |               | Linker for activation of T-cells family member 2 (NTAL)     |                 |         |
| P63102             |                                                  |               | 14-3-3 protein zeta/delta                                   |                 |         |
| P13386             |                                                  |               | High affinity immunoglobulin epsilon receptor subunit beta  |                 |         |
| F1LNT8             |                                                  |               | VAMP8                                                       |                 |         |
| Q6P6U0             |                                                  |               | Tyrosine-protein kinase Fgr                                 |                 |         |
| Q9JHW5             |                                                  |               | VAMP7                                                       |                 |         |
| Q62753             |                                                  |               | Syntaxin-binding protein 2                                  |                 |         |
| O70377             |                                                  |               | Synaptosomal-associated protein 23 (SNAP-23)                |                 |         |
| P20411             |                                                  |               | High affinity immunoglobulin epsilon receptor subunit gamma |                 |         |
| G3V637             |                                                  |               | Syntaxin-binding protein 2, isoform                         |                 |         |

**Annotation Cluster Enrichment Score: 3.10**

| ID Term            | GO Term                          | Fold Enriched | Count                                     | <i>p</i> -value | FDR    |
|--------------------|----------------------------------|---------------|-------------------------------------------|-----------------|--------|
| GO:0023056         | POSITIVE REGULATION OF SIGNALING | 1.43          | 112                                       | 9.53E-5         | 1.8E-2 |
| Annotated proteins |                                  |               |                                           |                 |        |
| Protein Accession  |                                  |               | Protein Identification                    |                 |        |
| D4A465             |                                  |               | Ragulator complex protein LAMTOR2         |                 |        |
| F1M2P8             |                                  |               | Protein kinase C alpha                    |                 |        |
| G3V8I4             |                                  |               | Syntaxin-4A                               |                 |        |
| Q00238             |                                  |               | Intercellular adhesion molecule 1 (ICAM1) |                 |        |
| Q5U204             |                                  |               | Ragulator complex protein LAMTOR3         |                 |        |
| P0DP29             |                                  |               | Calmodulin-1                              |                 |        |



|        |                                                                                   |
|--------|-----------------------------------------------------------------------------------|
| Q05030 | Platelet-derived growth factor receptor beta                                      |
| Q5PQL7 | Integral membrane protein 2C                                                      |
| D3ZAS9 | DDR GK domain containing 1                                                        |
| P49134 | Integrin beta 1                                                                   |
| P97546 | Neuroplastin                                                                      |
| Q9Z270 | VAMP-associated protein A                                                         |
| P07632 | Superoxide dismutase [Cu-Zn]                                                      |
| Q3SWT0 | Platelet endothelial cell adhesion molecule (Pecam1)                              |
| P35355 | Prostaglandin G/H synthase 2                                                      |
| P31044 | Phosphatidylethanolamine-binding protein 1                                        |
| P27139 | Carbonic anhydrase 2                                                              |
| Q9JLH7 | CDK5 regulatory subunit-associated protein 3                                      |
| Q6IN10 | Endothelin-converting enzyme 1 Isoform                                            |
| D3ZWS0 | Protein scribble homolog                                                          |
| Q9ES40 | PRA1 family protein 3                                                             |
| P61589 | Transforming protein RhoA                                                         |
| P20417 | Protein-tyrosine phosphatase 1B                                                   |
| F1LQ81 | Vesicle-fusing ATPase                                                             |
| Q63269 | Inositol 1,4,5-trisphosphate receptor type 3                                      |
| P63245 | Receptor of activated protein C kinase 1 (RACK1)                                  |
| P67779 | Prohibitin                                                                        |
| P70550 | Ras-related protein Rab-8b                                                        |
| Q2IBC7 | Hepatocyte growth factor receptor                                                 |
| P35704 | Peroxiredoxin-2                                                                   |
| P11762 | Galectin-1                                                                        |
| F1LSN4 | Fibroblast growth factor receptor                                                 |
| P06762 | Heme oxygenase 1                                                                  |
| Q6AXS4 | Renin receptor                                                                    |
| Q01621 | Tyrosine-protein kinase LCK                                                       |
| F1LNT8 | VAMP8                                                                             |
| Q6P791 | Ragulator complex protein LAMTOR1                                                 |
| D3ZYM4 | Macrophage stimulating 1 receptor                                                 |
| F1LZX9 | Integrin alpha 5                                                                  |
| P07943 | Aldose reductase                                                                  |
| P62836 | Ras-related protein Rap-1a                                                        |
| P62909 | 40S ribosomal protein S3                                                          |
| Q35796 | Complement component 1 Q subcomponent-binding protein mitochondrial               |
| M0RCF3 | Integrin beta 3                                                                   |
| D3ZF11 | Ragulator complex protein LAMTOR5                                                 |
| Q9JJ19 | Na(+)/H(+) exchange regulatory cofactor NHE-RF1                                   |
| Q5XI34 | Serine/threonine-protein phosphatase 2A 65 kDa regulatory subunit A alpha isoform |
| P10960 | Prosaposin                                                                        |
| P97887 | Presenilin-1                                                                      |
| P52555 | Endoplasmic reticulum resident protein 29                                         |

|        |                                                                  |
|--------|------------------------------------------------------------------|
| B0BN52 | Mitochondrial carrier homolog 2                                  |
| M0RDI5 | Mitochondrial calcium uniporter                                  |
| P06765 | Platelet factor 4                                                |
| G3V6N2 | Transmembrane emp24 domain-containing protein 4                  |
| Q6TXF3 | Acyl-CoA-binding protein                                         |
| P62138 | Serine/threonine-protein phosphatase PP1-alpha catalytic subunit |
| B2RYQ5 | Enhancer of rudimentary homolog                                  |
| E9PU37 | Palmitoyltransferase                                             |
| O88767 | Protein/nucleic acid deglycase DJ-1                              |
| Q9Z1Z1 | Eukaryotic translation initiation factor 2-alpha kinase 3        |
| P51577 | P2X purinoceptor 4                                               |
| P35213 | 14-3-3 protein beta/alpha                                        |
| Q642E3 | CDK5 regulatory subunit-associated protein 3, isoform            |
| O08775 | Vascular endothelial growth factor receptor 2                    |
| Q6AYI1 | Probable ATP-dependent RNA helicase DDX5                         |
| P47819 | Glial fibrillary acidic protein                                  |
| Q9EQX9 | Ubiquitin-conjugating enzyme E2 N                                |
| Q920P6 | Adenosine deaminase                                              |
| P10860 | Glutamate dehydrogenase 1                                        |
| P63095 | Guanine nucleotide-binding protein G(s) subunit alpha            |
| G3V7Q7 | Ras GTPase-activating-like protein IQGAP1                        |
| Q63116 | Mast/stem cell growth factor receptor                            |
| P11598 | Protein disulfide-isomerase A3                                   |
| Q64244 | ADP-ribosyl cyclase/cyclic ADP-ribose hydrolase 1                |
| Q62636 | Ras-related protein Rap-1b                                       |
| Q6P9V1 | CD81 molecule                                                    |
| P18418 | Calreticulin                                                     |
| O88777 | Presenilin-2                                                     |
| P08644 | GTPase KRas                                                      |
| O70601 | Linker for activation of T-cells family member 1 (LAT)           |
| P21708 | Mitogen-activated protein kinase 3                               |
| P04897 | Guanine nucleotide-binding protein G(i) subunit alpha-2          |
| Q497A2 | Solute carrier family 35 member B2                               |
| Q6IRF8 | V-type proton ATPase subunit S1                                  |
| Q08849 | Syntaxin-3                                                       |
| E9PT29 | ATP-dependent RNA helicase DDX17                                 |
| Q8CFN2 | Cell division control protein 42 homolog (CDC42)                 |
| Q9EPV5 | Apoptotic protease-activating factor 1                           |
| Q3B7U9 | Peptidyl-prolyl cis-trans isomerase FKBP8                        |
| Q68FX4 | Hematopoietic cell-specific LYN substrate 1 (hcls1)              |
| P58195 | Phospholipid scramblase 1                                        |
| Q9JHW5 | VAMP7                                                            |
| P84817 | Mitochondrial fission 1 protein                                  |
| F1LQJ7 | Phosphoenolpyruvate carboxykinase [GTP], mitochondrial           |

|        |                                                                     |
|--------|---------------------------------------------------------------------|
| Q66HG9 | Mitochondrial antiviral-signaling protein                           |
| Q68FP1 | Gelsolin                                                            |
| Q63486 | Ras-related GTP-binding protein A (Rag A)                           |
| Q07014 | Tyrosine-protein kinase Lyn                                         |
| M0RAU0 | Advanced glycosylation end product-specific receptor                |
| P20171 | GTPase HRas                                                         |
| Q9Z1E1 | Flotillin-1                                                         |
| P63025 | VAMP3                                                               |
| P04157 | Receptor-type tyrosine-protein phosphatase C (CD45)                 |
| Q4KM97 | Tyrosine-protein kinase BLK                                         |
| Q62940 | E3 ubiquitin-protein ligase NEDD4                                   |
| Q62658 | Peptidyl-prolyl cis-trans isomerase FKBP1A                          |
| B0BNJ1 | Sorcin                                                              |
| Q6P6U0 | Tyrosine-protein kinase Fgr                                         |
| Q63803 | Guanine nucleotide-binding protein G(s) subunit alpha isoforms XLas |
| G3V8A5 | Vacuolar protein sorting-associated protein 35                      |
| Q5XIH7 | Prohibitin 2                                                        |
| P00388 | NADPH--cytochrome P450 reductase                                    |

| ID Term            | GO Term                                   | Fold Enriched | Count                                                | <i>p</i> -value | FDR    |
|--------------------|-------------------------------------------|---------------|------------------------------------------------------|-----------------|--------|
| GO:0010647         | POSITIVE REGULATION OF CELL COMMUNICATION | 1.40          | 109                                                  | 2.93E-4         | 5.7E-2 |
| Annotated proteins |                                           |               |                                                      |                 |        |
| Protein Accession  |                                           |               | Protein Identification                               |                 |        |
| D4A465             |                                           |               | Ragulator complex protein LAMTOR2                    |                 |        |
| F1M2P8             |                                           |               | Protein kinase C alpha                               |                 |        |
| G3V8I4             |                                           |               | Syntaxin-4A                                          |                 |        |
| Q00238             |                                           |               | Intercellular adhesion molecule 1 (ICAM1)            |                 |        |
| Q5U204             |                                           |               | Ragulator complex protein LAMTOR3                    |                 |        |
| P0DP29             |                                           |               | Calmodulin-1                                         |                 |        |
| Q05030             |                                           |               | Platelet-derived growth factor receptor beta         |                 |        |
| Q5PQL7             |                                           |               | Integral membrane protein 2C                         |                 |        |
| D3ZAS9             |                                           |               | DDR GK domain containing 1                           |                 |        |
| P49134             |                                           |               | Integrin beta 1                                      |                 |        |
| P97546             |                                           |               | Neuroplastin                                         |                 |        |
| Q9Z270             |                                           |               | VAMP-associated protein A                            |                 |        |
| P07632             |                                           |               | Superoxide dismutase [Cu-Zn]                         |                 |        |
| P35355             |                                           |               | Prostaglandin G/H synthase 2                         |                 |        |
| Q3SWT0             |                                           |               | Platelet endothelial cell adhesion molecule (Pecam1) |                 |        |
| P31044             |                                           |               | Phosphatidylethanolamine-binding protein 1           |                 |        |
| P27139             |                                           |               | Carbonic anhydrase 2                                 |                 |        |

|        |                                                                                   |
|--------|-----------------------------------------------------------------------------------|
| Q9JLH7 | CDK5 regulatory subunit-associated protein 3                                      |
| Q6IN10 | Endothelin-converting enzyme 1 Isoform                                            |
| P61589 | Transforming protein RhoA                                                         |
| P20417 | Protein-tyrosine phosphatase 1B                                                   |
| Q9ES40 | PRA1 family protein 3                                                             |
| Q63269 | Inositol 1,4,5-trisphosphate receptor type 3                                      |
| P63245 | Receptor of activated protein C kinase 1 (RACK1)                                  |
| P67779 | Prohibitin                                                                        |
| P70550 | Ras-related protein Rab-8b                                                        |
| Q2IBC7 | Hepatocyte growth factor receptor                                                 |
| P35704 | Peroxiredoxin-2                                                                   |
| P11762 | Galectin-1                                                                        |
| F1LSN4 | Fibroblast growth factor receptor                                                 |
| P06762 | Heme oxygenase 1                                                                  |
| Q6AXS4 | Renin receptor                                                                    |
| Q01621 | Tyrosine-protein kinase LCK                                                       |
| F1LNT8 | VAMP8                                                                             |
| Q6P791 | Ragulator complex protein LAMTOR1                                                 |
| D3ZYM4 | Macrophage stimulating 1 receptor                                                 |
| F1LZX9 | Integrin alpha 5                                                                  |
| P07943 | Aldose reductase                                                                  |
| P62836 | Ras-related protein Rap-1a                                                        |
| P62909 | 40S ribosomal protein S3                                                          |
| O35796 | Complement component 1 Q subcomponent-binding protein mitochondrial               |
| M0RCF3 | Integrin beta 3                                                                   |
| D3ZF11 | Ragulator complex protein LAMTOR5                                                 |
| Q9JJ19 | Na(+)/H(+) exchange regulatory cofactor NHE-RF1                                   |
| Q5XI34 | Serine/threonine-protein phosphatase 2A 65 kDa regulatory subunit A alpha isoform |
| P10960 | Prosaposin                                                                        |
| P97887 | Presenilin-1                                                                      |
| P52555 | Endoplasmic reticulum resident protein 29                                         |
| B0BN52 | Mitochondrial carrier homolog 2                                                   |
| M0RDI5 | Mitochondrial calcium uniporter                                                   |
| P06765 | Platelet factor 4                                                                 |
| G3V6N2 | Transmembrane emp24 domain-containing protein 4                                   |
| Q6TXF3 | Acyl-CoA-binding protein                                                          |
| P62138 | Serine/threonine-protein phosphatase PP1-alpha catalytic subunit                  |
| B2RYQ5 | Enhancer of rudimentary homolog                                                   |
| E9PU37 | Palmitoyltransferase                                                              |
| O88767 | Protein/nucleic acid deglycase DJ-1                                               |
| Q9Z1Z1 | Eukaryotic translation initiation factor 2-alpha kinase 3                         |
| P51577 | P2X purinoceptor 4                                                                |
| P35213 | 14-3-3 protein beta/alpha                                                         |
| Q642E3 | CDK5 regulatory subunit-associated protein 3, isoform                             |

|        |                                                         |
|--------|---------------------------------------------------------|
| O08775 | Vascular endothelial growth factor receptor 2           |
| Q6AYI1 | Probable ATP-dependent RNA helicase DDX5                |
| P47819 | Glial fibrillary acidic protein                         |
| Q9EQX9 | Ubiquitin-conjugating enzyme E2 N                       |
| Q920P6 | Adenosine deaminase                                     |
| P10860 | Glutamate dehydrogenase 1                               |
| P63095 | Guanine nucleotide-binding protein G(s) subunit alpha   |
| G3V7Q7 | Ras GTPase-activating-like protein IQGAP1               |
| Q63116 | Mast/stem cell growth factor receptor                   |
| P11598 | Protein disulfide-isomerase A3                          |
| Q64244 | ADP-ribosyl cyclase/cyclic ADP-ribose hydrolase 1       |
| Q62636 | Ras-related protein Rap-1b                              |
| Q6P9V1 | CD81 molecule                                           |
| P18418 | Calreticulin                                            |
| O88777 | Presenilin-2                                            |
| P08644 | GTPase KRas                                             |
| O70601 | Linker for activation of T-cells family member 1 (LAT)  |
| P21708 | Mitogen-activated protein kinase 3                      |
| P04897 | Guanine nucleotide-binding protein G(i) subunit alpha-2 |
| Q497A2 | Solute carrier family 35 member B2                      |
| Q6IRF8 | V-type proton ATPase subunit S1                         |
| Q08849 | Syntaxin-3                                              |
| E9PT29 | ATP-dependent RNA helicase DDX17                        |
| Q8CFN2 | Cell division control protein 42 homolog (CDC42)        |
| Q9EPV5 | Apoptotic protease-activating factor 1                  |
| Q3B7U9 | Peptidyl-prolyl cis-trans isomerase FKBP8               |
| Q68FX4 | Hematopoietic cell-specific LYN substrate 1 (hcls1)     |
| P58195 | Phospholipid scramblase 1                               |
| Q9JHW5 | VAMP7                                                   |
| P84817 | Mitochondrial fission 1 protein                         |
| F1LQJ7 | Phosphoenolpyruvate carboxykinase [GTP], mitochondrial  |
| Q66HG9 | Mitochondrial antiviral-signaling protein               |
| Q68FP1 | Gelsolin                                                |
| Q63486 | Ras-related GTP-binding protein A (Rag A)               |
| Q07014 | Tyrosine-protein kinase Lyn                             |
| M0RAU0 | Advanced glycosylation end product-specific receptor    |
| P20171 | GTPase HRas                                             |
| Q9Z1E1 | Flotillin-1                                             |
| P04157 | Receptor-type tyrosine-protein phosphatase C (CD45)     |
| Q4KM97 | Tyrosine-protein kinase BLK                             |
| Q62940 | E3 ubiquitin-protein ligase NEDD4                       |
| Q62658 | Peptidyl-prolyl cis-trans isomerase FKBP1A              |
| B0BNJ1 | Sorcin                                                  |
| Q6P6U0 | Tyrosine-protein kinase Fgr                             |

|        |                                                                     |
|--------|---------------------------------------------------------------------|
| Q63803 | Guanine nucleotide-binding protein G(s) subunit alpha isoforms XLas |
| G3V8A5 | Vacuolar protein sorting-associated protein 35                      |
| Q5XIH7 | Prohibitin 2                                                        |
| P00388 | NADPH--cytochrome P450 reductase                                    |

| ID Term            | GO Term                                                  | Fold Enriched | Count                                                     | <i>p</i> -value | FDR    |
|--------------------|----------------------------------------------------------|---------------|-----------------------------------------------------------|-----------------|--------|
| GO:1902533         | POSITIVE REGULATION OF INTRACELLULAR SIGNAL TRANSDUCTION | 1.65          | 78                                                        | 1.87E-5         | 3.6E-2 |
| Annotated proteins |                                                          |               |                                                           |                 |        |
| Protein Accession  |                                                          |               | Protein Identification                                    |                 |        |
| D4A465             |                                                          |               | Ragulator complex protein LAMTOR2                         |                 |        |
| F1M2P8             |                                                          |               | Protein kinase C alpha                                    |                 |        |
| Q00238             |                                                          |               | Intercellular adhesion molecule 1 (ICAM1)                 |                 |        |
| Q5U204             |                                                          |               | Ragulator complex protein LAMTOR3                         |                 |        |
| P0DP29             |                                                          |               | Calmodulin-1                                              |                 |        |
| Q05030             |                                                          |               | Platelet-derived growth factor receptor beta              |                 |        |
| E9PU37             |                                                          |               | Palmitoyltransferase                                      |                 |        |
| O88767             |                                                          |               | Protein/nucleic acid deglycase DJ-1                       |                 |        |
| Q9Z1Z1             |                                                          |               | Eukaryotic translation initiation factor 2-alpha kinase 3 |                 |        |
| P51577             |                                                          |               | P2X purinoceptor 4                                        |                 |        |
| P35213             |                                                          |               | 14-3-3 protein beta/alpha                                 |                 |        |
| Q642E3             |                                                          |               | CDK5 regulatory subunit-associated protein 3, isoform     |                 |        |
| Q6AYI1             |                                                          |               | Probable ATP-dependent RNA helicase DDX5                  |                 |        |
| O08775             |                                                          |               | Vascular endothelial growth factor receptor 2             |                 |        |
| Q9EQX9             |                                                          |               | Ubiquitin-conjugating enzyme E2 N                         |                 |        |
| D3ZAS9             |                                                          |               | DDRKG domain containing 1                                 |                 |        |
| P49134             |                                                          |               | Integrin beta 1                                           |                 |        |
| P97546             |                                                          |               | Neuroplastin                                              |                 |        |
| Q920P6             |                                                          |               | Adenosine deaminase                                       |                 |        |
| P63095             |                                                          |               | Guanine nucleotide-binding protein G(s) subunit alpha     |                 |        |
| G3V7Q7             |                                                          |               | Ras GTPase-activating-like protein IQGAP1                 |                 |        |
| Q9Z270             |                                                          |               | VAMP-associated protein A                                 |                 |        |
| P07632             |                                                          |               | Superoxide dismutase [Cu-Zn]                              |                 |        |
| Q3SWT0             |                                                          |               | Platelet endothelial cell adhesion molecule (Pecam1)      |                 |        |
| P35355             |                                                          |               | Prostaglandin G/H synthase 2                              |                 |        |
| Q63116             |                                                          |               | Mast/stem cell growth factor receptor                     |                 |        |
| P31044             |                                                          |               | Phosphatidylethanolamine-binding protein 1                |                 |        |
| Q9JLH7             |                                                          |               | CDK5 regulatory subunit-associated protein 3              |                 |        |
| P18418             |                                                          |               | Calreticulin                                              |                 |        |
| Q6P9V1             |                                                          |               | CD81 molecule                                             |                 |        |

|        |                                                                     |
|--------|---------------------------------------------------------------------|
| Q62636 | Ras-related protein Rap-1b                                          |
| Q9ES40 | PRA1 family protein 3                                               |
| P61589 | Transforming protein RhoA                                           |
| P20417 | Protein-tyrosine phosphatase 1B                                     |
| P63245 | Receptor of activated protein C kinase 1 (RACK1)                    |
| P67779 | Prohibitin                                                          |
| P08644 | GTPase KRas                                                         |
| Q2IBC7 | Hepatocyte growth factor receptor                                   |
| P35704 | Peroxiredoxin-2                                                     |
| P21708 | Mitogen-activated protein kinase 3                                  |
| P04897 | Guanine nucleotide-binding protein G(i) subunit alpha-2             |
| P11762 | Galectin-1                                                          |
| Q497A2 | Solute carrier family 35 member B2                                  |
| F1LSN4 | Fibroblast growth factor receptor                                   |
| Q6IRF8 | V-type proton ATPase subunit S1                                     |
| P06762 | Heme oxygenase 1                                                    |
| Q8CFN2 | Cell division control protein 42 homolog (CDC42)                    |
| Q01621 | Tyrosine-protein kinase LCK                                         |
| Q6P791 | Ragulator complex protein LAMTOR1                                   |
| D3ZYM4 | Macrophage stimulating 1 receptor                                   |
| Q68FX4 | Hematopoietic cell-specific LYN substrate 1 (hcls1)                 |
| P07943 | Aldose reductase                                                    |
| P58195 | Phospholipid scramblase 1                                           |
| F1LZX9 | Integrin alpha 5                                                    |
| P84817 | Mitochondrial fission 1 protein                                     |
| P62836 | Ras-related protein Rap-1a                                          |
| P62909 | 40S ribosomal protein S3                                            |
| O35796 | Complement component 1 Q subcomponent-binding protein mitochondrial |
| M0RCF3 | Integrin beta 3                                                     |
| Q66HG9 | Mitochondrial antiviral-signaling protein                           |
| D3ZF11 | Ragulator complex protein LAMTOR5                                   |
| Q9JJ19 | Na(+)/H(+) exchange regulatory cofactor NHE-RF1                     |
| Q63486 | Ras-related GTP-binding protein A (Rag A)                           |
| Q07014 | Tyrosine-protein kinase Lyn                                         |
| P10960 | Prosaposin                                                          |
| P97887 | Presenilin-1                                                        |
| M0RAU0 | Advanced glycosylation end product-specific receptor                |
| P52555 | Endoplasmic reticulum resident protein 29                           |
| P20171 | GTPase HRas                                                         |
| B0BN52 | Mitochondrial carrier homolog 2                                     |
| P04157 | Receptor-type tyrosine-protein phosphatase C (CD45)                 |
| Q62940 | E3 ubiquitin-protein ligase NEDD4                                   |
| P06765 | Platelet factor 4                                                   |
| Q62658 | Peptidyl-prolyl cis-trans isomerase FKBP1A                          |

|        |                                                                     |
|--------|---------------------------------------------------------------------|
| G3V6N2 | Transmembrane emp24 domain-containing protein 4                     |
| Q63803 | Guanine nucleotide-binding protein G(s) subunit alpha isoforms XLas |
| Q6P6U0 | Tyrosine-protein kinase Fgr                                         |
| Q5XIH7 | Prohibitin 2                                                        |

## ISOLATED TERMS

| ID Term            | GO Term                  | Fold Enriched | Count                                                                   | <i>p</i> -value | FDR      |
|--------------------|--------------------------|---------------|-------------------------------------------------------------------------|-----------------|----------|
| GO:0098796         | MEMBRANE PROTEIN COMPLEX | 3.46          | 187                                                                     | 6.99E-37        | 1.08E-32 |
| Annotated proteins |                          |               |                                                                         |                 |          |
| Protein Accession  |                          |               | Protein Identification                                                  |                 |          |
| D4A465             |                          |               | Regulator complex protein LAMTOR2                                       |                 |          |
| D3ZAF6             |                          |               | ATP synthase subunit F mitochondrial                                    |                 |          |
| Q9Z2L0             |                          |               | Voltage-dependent anion-selective channel protein 1                     |                 |          |
| Q6P503             |                          |               | V-type proton ATPase subunit D                                          |                 |          |
| P25235             |                          |               | Dolichyl-diphosphooligosaccharide protein glycosyltransferase subunit 2 |                 |          |
| Q4G002             |                          |               | Histocompatibility 2 T region locus 24                                  |                 |          |
| P50408             |                          |               | V-type proton ATPase subunit F                                          |                 |          |
| B2RZD1             |                          |               | Protein transport protein Sec61 subunit beta                            |                 |          |
| G3V8I4             |                          |               | Syntaxin-4A                                                             |                 |          |
| P11442             |                          |               | Clathrin heavy chain 1                                                  |                 |          |
| Q68FY0             |                          |               | Cytochrome b-c1 complex subunit 1 mitochondrial                         |                 |          |
| Q5U204             |                          |               | Regulator complex protein LAMTOR3                                       |                 |          |
| D3ZMR1             |                          |               | Translocase of outer mitochondrial membrane 7                           |                 |          |
| P0DP29             |                          |               | Calmodulin-1                                                            |                 |          |
| P12075             |                          |               | Cytochrome c oxidase subunit 5B mitochondrial                           |                 |          |
| Q6AYM8             |                          |               | Glycosylphosphatidylinositol anchor attachment 1                        |                 |          |
| P11951             |                          |               | Cytochrome c oxidase subunit 6C2                                        |                 |          |
| G3V7L8             |                          |               | V-type proton ATPase subunit E 1 isoform                                |                 |          |
| G3V679             |                          |               | Transferrin receptor protein 1                                          |                 |          |
| Q920L2             |                          |               | Succinate dehydrogenase [ubiquinone] flavoprotein subunit mitochondrial |                 |          |
| P06686             |                          |               | Sodium/potassium-transporting ATPase subunit alpha-2                    |                 |          |
| P06687             |                          |               | Sodium/potassium-transporting ATPase subunit alpha-3                    |                 |          |
| P06685             |                          |               | Sodium/potassium-transporting ATPase subunit alpha-1                    |                 |          |
| Q6PCU2             |                          |               | V-type proton ATPase subunit E 1                                        |                 |          |
| BOBNG0             |                          |               | ER membrane protein complex subunit 2                                   |                 |          |
| Q641Y2             |                          |               | NADH dehydrogenase [ubiquinone] iron-sulfur protein 2                   |                 |          |
| Q4FZT0             |                          |               | Stomatin-like protein 2                                                 |                 |          |
| P49134             |                          |               | Integrin beta 1                                                         |                 |          |
| Q641Y0             |                          |               | Oligosaccharyl transferase 48 kDa subunit                               |                 |          |



|        |                                                                   |
|--------|-------------------------------------------------------------------|
| B2RYD7 | STT3B, catalytic subunit of the oligosaccharyltransferase complex |
| G3V8Q1 | Coatomer subunit epsilon                                          |
| Q561S0 | NADH dehydrogenase [ubiquinone] 1 alpha subcomplex subunit 10     |
| P19511 | ATP synthase F(0) complex subunit B1 mitochondrial                |
| D3ZJS3 | Translocase of outer mitochondrial membrane 6                     |
| Q5M7T6 | V-type proton ATPase subunit D 1                                  |
| G3V7M2 | Integrin beta 7                                                   |
| D4A0T0 | NADH dehydrogenase 1 beta subcomplex subunit 10                   |
| G3V6P8 | Guanine nucleotide-binding protein gamma-12                       |
| Q8SEZ5 | Cytochrome c oxidase subunit 2                                    |
| P21571 | ATP synthase-coupling factor 6 mitochondrial                      |
| A1L134 | Ancient ubiquitous protein 1                                      |
| G3V6P7 | Myosin heavy chain 9                                              |
| P20411 | High affinity immunoglobulin epsilon receptor subunit gamma       |
| P16391 | RT1 class I histocompatibility antigen AA alpha chain             |
| P46462 | Transitional endoplasmic reticulum ATPase                         |
| Q4KM74 | Vesicle-trafficking protein SEC22b                                |
| F1M5Z5 | Anoctamin-6                                                       |
| Q62991 | Syntaxin-binding protein 1-like 2                                 |
| Q62896 | Bet1 golgi vesicular membrane trafficking protein                 |
| D3ZD11 | Signal peptidase complex subunit 2                                |
| Q3KRC3 | Signal recognition particle receptor alpha                        |
| Q2I6B2 | V-type proton ATPase subunit A1                                   |
| Q2I6B1 | V-type proton ATPase subunit A2                                   |
| D4A0E2 | NSF attachment protein gamma                                      |
| Q6MGA3 | Antigen peptide transporter 2                                     |
| F1LNT8 | VAMP8                                                             |
| Q6P791 | Ragulator complex protein LAMTOR1                                 |
| Q5U2V8 | ER membrane protein complex subunit 3                             |
| F1LZX9 | Integrin alpha 5                                                  |
| D3ZF12 | Signal peptidase complex subunit 3                                |
| Q861Q1 | MHC class I antigen                                               |
| D4A0W1 | ER membrane protein complex subunit 4                             |
| M0RCF3 | Integrin beta 3                                                   |
| O35142 | Coatomer subunit beta 2                                           |
| D3ZF11 | Ragulator complex protein LAMTOR5                                 |
| Q63377 | Sodium/potassium-transporting ATPase subunit beta-3               |
| Q95II0 | MHC class Ib antigen                                              |
| M0RBJ0 | Guanine nucleotide-binding protein gamma-2                        |
| Q63584 | Transmembrane emp24 domain-containing protein 10                  |
| Q3KR86 | MICOS complex subunit Mic60                                       |
| P08753 | Guanine nucleotide-binding protein G(k) subunit alpha             |
| P97887 | Presenilin-1                                                      |
| Q5XI31 | GPI transamidase component PIG-S                                  |

|        |                                                                            |
|--------|----------------------------------------------------------------------------|
| P36370 | Antigen peptide transporter 1                                              |
| D3ZWZ1 | Integrin alpha X                                                           |
| G3V8F5 | Mitochondrial import receptor subunit TOM40 homolog                        |
| Q6IN37 | GM2 ganglioside activator                                                  |
| F1M779 | Clathrin heavy chain                                                       |
| P32551 | Cytochrome b-c1 complex subunit 2 mitochondrial                            |
| Q5BK32 | FAS-associated factor 2                                                    |
| G3V887 | V-type proton ATPase subunit A                                             |
| Q5RKH6 | Protein OS-9                                                               |
| G3V667 | Integrin alpha 6                                                           |
| P13386 | High affinity immunoglobulin epsilon receptor subunit beta                 |
| M0RDI5 | Mitochondrial calcium uniporter                                            |
| Q10758 | Keratin, type II cytoskeletal 8                                            |
| P61805 | Dolichyl-diphosphooligosaccharide protein glycosyltransferase subunit DAD1 |
| B4F7C9 | STT3A, catalytic subunit of the oligosaccharyltransferase complex          |
| P20788 | Cytochrome b-c1 complex subunit Rieske                                     |
| P82471 | Guanine nucleotide-binding protein G(q) subunit alpha                      |
| Q9R1Z0 | Voltage-dependent anion-selective channel protein 3                        |
| Q6MG61 | Chloride intracellular channel protein 1                                   |
| G3V9X8 | Magnesium transporter protein 1                                            |
| P54311 | Transducin beta-1                                                          |
| B2RYQ2 | Serine/threonine-protein phosphatase 2A activator                          |
| F1LPK9 | Phosphatidylinositol glycan anchor biosynthesis class U protein            |
| P11240 | Cytochrome c oxidase subunit 5A mitochondrial                              |
| Q64541 | Sodium/potassium-transporting ATPase subunit alpha-4                       |
| O70257 | Syntaxin-7                                                                 |
| O88767 | Protein/nucleic acid deglycase DJ-1                                        |
| Q75Q41 | Mitochondrial import receptor subunit TOM22 homolog                        |
| P31399 | ATP synthase subunit D mitochondrial                                       |
| G3V8L7 | Integrin alpha M                                                           |
| P17046 | Lysosome-associated membrane glycoprotein 2 (Lamp2)                        |
| D3ZUX5 | MICOS complex subunit MIC-19                                               |
| F1LNC4 | Vesicle transport through interaction with t-SNAREs homolog 1B             |
| G3V6D3 | ATP synthase subunit beta                                                  |
| Q9QYE7 | Integrin alpha D                                                           |
| F7FNS3 | Derlin                                                                     |
| D3ZJX5 | Mitochondrial import inner membrane translocase subunit TIM50              |
| P70580 | Membrane-associated progesterone receptor component 1                      |
| Q66H80 | Coatomer subunit delta                                                     |
| G3V7P1 | Syntaxin-12                                                                |
| D3ZDR2 | Charged multivesicular body protein 6                                      |
| E9PTI1 | V-type proton ATPase subunit H                                             |
| P63095 | Guanine nucleotide-binding protein G(s) subunit alpha                      |
| D4ABY2 | Coatomer subunit gamma 2                                                   |

|        |                                                                        |
|--------|------------------------------------------------------------------------|
| P35435 | ATP synthase subunit gamma mitochondrial                               |
| D3ZZS8 | V-type proton ATPase subunit B, kidney isoform                         |
| O35165 | Golgi SNAP receptor complex member 2                                   |
| B2GUV5 | V-type proton ATPase subunit G 1                                       |
| P11598 | Protein disulfide-isomerase A3                                         |
| D4A7Y9 | Essential MCU regulator, mitochondrial                                 |
| G3V6T1 | Coatomer subunit alpha                                                 |
| P81155 | Voltage-dependent anion-selective channel protein 2                    |
| P18418 | Calreticulin                                                           |
| Q5XIP2 | GPI-anchor transamidase                                                |
| Q63635 | Syntaxin-6                                                             |
| Q9WU70 | Syntaxin-binding protein 5                                             |
| P62815 | V-type proton ATPase subunit B                                         |
| Q9Z2Q7 | Syntaxin-8                                                             |
| Q5FVL2 | ER membrane protein complex subunit 8                                  |
| Q5M9I5 | Cytochrome b-c1 complex subunit 6 mitochondrial                        |
| F1M7T6 | Translocon-associated protein subunit gamma                            |
| P54921 | Alpha-soluble NSF attachment protein (SNAP-alpha)                      |
| D3ZG43 | NADH dehydrogenase (ubiquinone) iron-sulfur protein 3                  |
| Q9Z2J5 | VAMP5                                                                  |
| G3V8C4 | Chloride intracellular channel protein 4                               |
| P63039 | 60 kDa heat shock protein                                              |
| P10719 | ATP synthase subunit beta mitochondrial                                |
| P04897 | Guanine nucleotide-binding protein G(i) subunit alpha-2                |
| P14659 | Heat shock-related 70 kDa protein 2                                    |
| Q6IRF8 | V-type proton ATPase subunit S1                                        |
| Q08849 | Syntaxin-3                                                             |
| P09527 | Ras-related protein Rab-7a                                             |
| B5DEL8 | NADH dehydrogenase (Ubiquinone) iron-sulfur protein 5                  |
| P29419 | ATP synthase subunit E mitochondrial                                   |
| P10888 | Cytochrome c oxidase subunit 4 isoform 1 mitochondrial                 |
| Q08851 | Syntaxin-5                                                             |
| F1LQ92 | Sel-1 homolog 1                                                        |
| Q9JHW5 | VAMP7                                                                  |
| D4A2H2 | Serine palmitoyltransferase 1                                          |
| O70377 | Synaptosomal-associated protein 23 (SNAP-23)                           |
| D4A133 | V-type proton ATPase catalytic subunit A                               |
| D3ZCZ9 | NADH dehydrogenase [ubiquinone] iron-sulfur protein 6                  |
| Q63486 | Ras-related GTP-binding protein A (Rag A)                              |
| P21913 | Succinate dehydrogenase [ubiquinone] iron-sulfur subunit mitochondrial |
| Q07014 | Tyrosine-protein kinase Lyn                                            |
| Q6AXV4 | Sorting and assembly machinery component 50 homolog                    |
| Q4AEF8 | Coatomer subunit gamma 1                                               |
| Q07984 | Translocon-associated protein subunit delta                            |

|        |                                                                         |
|--------|-------------------------------------------------------------------------|
| B5DF51 | Membrane magnesium transporter 1                                        |
| D4A994 | ER membrane protein complex subunit 1                                   |
| Q9Z1E1 | Flotillin-1                                                             |
| Q3B7D2 | Serine palmitoyltransferase 2                                           |
| P63025 | VAMP3                                                                   |
| D3ZFK5 | Signal peptidase complex subunit 1                                      |
| P07151 | Beta-2-microglobulin                                                    |
| P15999 | ATP synthase subunit alpha mitochondrial                                |
| P19234 | NADH dehydrogenase [ubiquinone] flavoprotein 2 mitochondrial            |
| D3ZQG9 | RT1 class I locus CE4                                                   |
| Q64273 | Inward rectifier potassium channel 2                                    |
| P19627 | Guanine nucleotide-binding protein G(z) subunit alpha                   |
| Q66HF1 | NADH-ubiquinone oxidoreductase 75 kDa subunit mitochondrial             |
| B2RYB8 | Integrin beta 2                                                         |
| Q5XIH3 | NADH dehydrogenase [ubiquinone] flavoprotein 1                          |
| Q63803 | Guanine nucleotide-binding protein G(s) subunit alpha isoforms XLas     |
| Q9Z2S9 | Flotillin-2                                                             |
| P23514 | Coatomer subunit beta 1                                                 |
| Q62753 | Syntaxin-binding protein 2                                              |
| G3V8A5 | Vacuolar protein sorting-associated protein 35                          |
| D3ZP98 | Minor histocompatibility antigen H13                                    |
| Q99JC6 | Tapasin                                                                 |
| Q9ES21 | Phosphatidylinositol phosphatase SAC1                                   |
| P07153 | Dolichyl-diphosphooligosaccharide protein glycosyltransferase subunit 1 |
| Q06647 | ATP synthase subunit O mitochondrial                                    |
| G3V637 | Syntaxin-binding protein 2, isoform                                     |

| ID Term            | GO Term               | Fold Enriched | Count                                         | <i>p</i> -value | FDR      |
|--------------------|-----------------------|---------------|-----------------------------------------------|-----------------|----------|
| GO:0061024         | MEMBRANE ORGANIZATION | 2.77          | 119                                           | 2.58E-24        | 5.06E-21 |
| Annotated proteins |                       |               |                                               |                 |          |
| Protein Accession  |                       |               | Protein Identification                        |                 |          |
| G3V8I4             |                       |               | Syntaxin-4A                                   |                 |          |
| B2RZD1             |                       |               | Protein transport protein Sec61 subunit beta  |                 |          |
| P11442             |                       |               | Clathrin heavy chain 1                        |                 |          |
| Q6QBQ4             |                       |               | Phospholipid scramblase 3                     |                 |          |
| D3ZMR1             |                       |               | Translocase of outer mitochondrial membrane 7 |                 |          |
| P61107             |                       |               | Ras-related protein Rab-14                    |                 |          |
| D4ADS9             |                       |               | EFR3 homolog A                                |                 |          |
| Q05962             |                       |               | ADP/ATP translocase 1                         |                 |          |
| Q6PCU4             |                       |               | Emerin                                        |                 |          |
| P61972             |                       |               | Nuclear transport factor 2                    |                 |          |
| Q4FZT0             |                       |               | Stomatin-like protein 2                       |                 |          |

|        |                                                                  |
|--------|------------------------------------------------------------------|
| P49134 | Integrin beta 1                                                  |
| Q62733 | Lamina-associated polypeptide 2 isoform beta                     |
| Q9Z270 | VAMP-associated protein A                                        |
| F1M8X9 | Golgi brefeldin A-resistant guanine nucleotide exchange factor 1 |
| P07632 | Superoxide dismutase [Cu-Zn]                                     |
| E9PU78 | Isoform Bcl-X(S) of Bcl-2-like protein 1                         |
| E9PU77 | Synaptotagmin-like protein 3                                     |
| Q6NYB7 | Ras-related protein Rab-1a                                       |
| F1LQ81 | Vesicle-fusing ATPase                                            |
| G3V7M2 | Integrin beta 7                                                  |
| Q9Z269 | VAMP-associated protein B                                        |
| P63245 | Receptor of activated protein C kinase 1 (RACK1)                 |
| G3V6P7 | Myosin heavy chain 9                                             |
| P20411 | High affinity immunoglobulin epsilon receptor subunit gamma      |
| Q4KM74 | Vesicle-trafficking protein SEC22b                               |
| Q5BJY9 | Keratin, type I cytoskeletal 18                                  |
| F1M5Z5 | Anoctamin-6                                                      |
| P70550 | Ras-related protein Rab-8b                                       |
| Q62896 | Bet1 golgi vesicular membrane trafficking protein                |
| Q32PX6 | Rho-related GTP-binding protein RhoG                             |
| Q5XI41 | Translocating chain-associated membrane protein 1                |
| Q3KRC3 | Signal recognition particle receptor alpha                       |
| A1L1L6 | Mitochondrial Rho GTPase 1                                       |
| O88600 | Heat shock 70 kDa protein 4                                      |
| D4A0E2 | NSF attachment protein gamma                                     |
| F1LNT8 | VAMP8                                                            |
| Q78P65 | Rap2A-like protein                                               |
| Q63377 | Sodium/potassium-transporting ATPase subunit beta-3              |
| Q9JJ19 | Na(+)/H(+) exchange regulatory cofactor NHE-RF1                  |
| Q63584 | Transmembrane emp24 domain-containing protein 10                 |
| Q3KR86 | MICOS complex subunit Mic60                                      |
| P08753 | Guanine nucleotide-binding protein G(k) subunit alpha            |
| Q9JLT0 | Myosin heavy chain 10                                            |
| Q9QYW3 | MOB-like protein phocein                                         |
| P82995 | Heat shock protein HSP 90-alpha                                  |
| F1M779 | Clathrin heavy chain                                             |
| Q6IN37 | GM2 ganglioside activator                                        |
| P0C1Q3 | Lysophosphatidylcholine acyltransferase 2                        |
| B0BN52 | Mitochondrial carrier homolog 2                                  |
| P61621 | SEC61 alpha-1                                                    |
| P50398 | Rab GDP dissociation inhibitor alpha                             |
| Q7TSA0 | Mitochondrial Rho GTPase 2                                       |
| Q5XIN6 | Mitochondrial proton/calcium exchanger protein                   |
| Q6RUV5 | Ras-related C3 botulinum toxin substrate 1 (Rac1)                |

|        |                                                                |
|--------|----------------------------------------------------------------|
| Q07936 | Annexin A2                                                     |
| E9PT65 | Radixin                                                        |
| O35152 | BET1-like protein                                              |
| G3V6W2 | Prolactin regulatory element-binding protein                   |
| P63018 | Heat shock cognate 71 kDa protein                              |
| Q498C8 | Protein RER1                                                   |
| D4A2Z6 | Translocation protein SEC63 homolog                            |
| P63012 | Ras-related protein Rab-3a                                     |
| Q7TP42 | Translocation protein SEC62                                    |
| O70257 | Syntaxin-7                                                     |
| Q75Q41 | Mitochondrial import receptor subunit TOM22 homolog            |
| D3ZUX5 | MICOS complex subunit MIC-19                                   |
| O35509 | Ras-related protein Rab-11b                                    |
| F1LNC4 | Vesicle transport through interaction with t-SNAREs homolog 1B |
| D3ZJX5 | Mitochondrial import inner membrane translocase subunit TIM50  |
| G3V7P1 | Syntaxin-12                                                    |
| D3ZDR2 | Charged multivesicular body protein 6                          |
| Q91ZN1 | Coronin-1A                                                     |
| O35165 | Golgi SNAP receptor complex member 2                           |
| P26453 | Basigin                                                        |
| D3ZGV2 | Peroxisomal membrane protein PEX16                             |
| Q5RKJ9 | Ras-related protein Rab-10                                     |
| Q5PQX1 | Torsin-1A-interacting protein 1                                |
| Q3MIE4 | Synaptic vesicle membrane protein VAT-1 homolog                |
| Q63635 | Syntaxin-6                                                     |
| Q09073 | ADP/ATP translocase 2                                          |
| Q5I0E7 | Transmembrane emp24 domain-containing protein 9                |
| Q9Z2Q7 | Syntaxin-8                                                     |
| G3V6E1 | Myosin heavy chain 2                                           |
| Q5XIP9 | Transmembrane protein 43 (Protein LUMA)                        |
| O35987 | NSFL1 cofactor p47                                             |
| F1M7T6 | Translocon-associated protein subunit gamma                    |
| P54921 | Alpha-soluble NSF attachment protein (SNAP-alpha)              |
| Q9Z2J5 | VAMP5                                                          |
| A3RLA8 | Low affinity immunoglobulin gamma Fc region receptor II        |
| Q08849 | Syntaxin-3                                                     |
| P09527 | Ras-related protein Rab-7a                                     |
| Q08851 | Syntaxin-5                                                     |
| Q5XI04 | Erythrocyte band 7 integral membrane protein                   |
| Q63151 | Long chain fatty acid CoA ligase 3                             |
| P58195 | Phospholipid scramblase 1                                      |
| Q63524 | Transmembrane emp24 domain-containing protein 2                |
| Q9JHW5 | VAMP7                                                          |
| P84817 | Mitochondrial fission 1 protein                                |

|        |                                                      |
|--------|------------------------------------------------------|
| Q4V7D1 | Translocon-associated protein subunit alpha          |
| O70377 | Synaptosomal-associated protein 23 (SNAP-23)         |
| Q68FP1 | Gelsolin                                             |
| Q63483 | Ras-related protein Rab-38                           |
| Q6AXV4 | Sorting and assembly machinery component 50 homolog  |
| P27881 | Hexokinase-2                                         |
| M0RAU0 | Advanced glycosylation end product-specific receptor |
| P31977 | Ezrin                                                |
| Q9Z1E1 | Flotillin-1                                          |
| P63025 | VAMP3                                                |
| P13832 | Myosin regulatory light chain RLC-A                  |
| P07150 | Annexin A1                                           |
| Q6AYQ1 | Golgin subfamily A member 7                          |
| B2RYB8 | Integrin beta 2                                      |
| Q6MG49 | Large proline-rich protein BAG6                      |
| Q9Z2S9 | Flotillin-2                                          |
| G3V8A5 | Vacuolar protein sorting-associated protein 35       |
| Q5BQE6 | Delta(24)-sterol reductase                           |
| D4A5K6 | Zinc metalloproteinase STE24                         |
| P35280 | Ras-related protein Rab-8a                           |

| ID Term            | GO Term                    | Fold Enriched | Count                                                                   | p-value   | FDR       |
|--------------------|----------------------------|---------------|-------------------------------------------------------------------------|-----------|-----------|
| GO:0043227         | MEMBRANE-BOUNDED ORGANELLE | 1.53          | 863                                                                     | 8.75E-111 | 9.36E-109 |
| Annotated proteins |                            |               |                                                                         |           |           |
| Protein Accession  |                            |               | Protein Identification                                                  |           |           |
| Q10473             |                            |               | Pol+AZ716:BB737ypeptide N-acetylgalactosaminyltransferase 1             |           |           |
| P50408             |                            |               | V-type proton ATPase subunit F                                          |           |           |
| Q62876             |                            |               | Synaptogyrin-1                                                          |           |           |
| Q63716             |                            |               | Peroxiredoxin-1                                                         |           |           |
| P0DP29             |                            |               | Calmodulin-1                                                            |           |           |
| Q8R4A1             |                            |               | ERO1-like protein alpha                                                 |           |           |
| D3ZXF9             |                            |               | 39S ribosomal protein L12, mitochondrial                                |           |           |
| G3V852             |                            |               | Talin-1                                                                 |           |           |
| B0BN02             |                            |               | Metaxin 1                                                               |           |           |
| P13084             |                            |               | Nucleophosmin                                                           |           |           |
| Q920L2             |                            |               | Succinate dehydrogenase [ubiquinone] flavoprotein subunit mitochondrial |           |           |
| Q641Y2             |                            |               | NADH dehydrogenase [ubiquinone] iron-sulfur protein 2                   |           |           |
| D3ZAS9             |                            |               | DDRKG domain containing 1                                               |           |           |
| Q9ESV6             |                            |               | Glyceraldehyde-3-phosphate dehydrogenase testis-specific                |           |           |
| Q641Y0             |                            |               | Oligosaccharyl transferase 48 kDa subunit                               |           |           |
| Q5XI52             |                            |               | Vezatin                                                                 |           |           |
| Q66H15             |                            |               | Regulator of microtubule dynamics protein 3                             |           |           |

|        |                                                                                   |
|--------|-----------------------------------------------------------------------------------|
| Q9Z270 | VAMP-associated protein A                                                         |
| P07632 | Superoxide dismutase [Cu-Zn]                                                      |
| Q66H18 | Synaptophysin-like 1                                                              |
| Q10468 | Beta-1,4 N-acetylgalactosaminyltransferase 1                                      |
| G3V9U7 | Sarcoplasmic/endoplasmic reticulum calcium ATPase 3 (SERCA3)                      |
| Q7TP15 | S-methyl-5'-thioadenosine phosphorylase                                           |
| P20417 | Protein-tyrosine phosphatase 1B                                                   |
| Q01205 | 2-oxoglutarate dehydrogenase complex component E2                                 |
| G3V7U6 | Calpain 5                                                                         |
| P68511 | 14-3-3 protein eta                                                                |
| Q9Z269 | VAMP-associated protein B                                                         |
| Q4V888 | Type 2 phosphatidylinositol 4,5-bisphosphate 4-phosphatase                        |
| P21571 | ATP synthase-coupling factor 6 mitochondrial                                      |
| F1M5Z5 | Anoctamin-6                                                                       |
| D3ZRN3 | Beta-actin-like protein 2                                                         |
| P51796 | Chloride intracellular channel protein 5                                          |
| Q62896 | Bet1 golgi vesicular membrane trafficking protein                                 |
| Q5XI41 | Translocating chain-associated membrane protein 1                                 |
| O88989 | Malate dehydrogenase cytoplasmic                                                  |
| Q9QX80 | Heterogeneous nuclear ribonucleoprotein A/B                                       |
| P27615 | Lysosome membrane protein 2 (CD36)                                                |
| P06762 | Heme oxygenase 1                                                                  |
| P06761 | Endoplasmic reticulum chaperone BiP                                               |
| Q9QYV0 | Disintegrin and metalloproteinase domain-containing protein 15                    |
| G3V878 | Signal peptidase complex catalytic subunit SEC11                                  |
| B0K020 | CDGSH iron-sulfur domain-containing protein 1                                     |
| P63102 | 14-3-3 protein zeta/delta                                                         |
| Q9EST6 | Acidic leucine-rich nuclear phosphoprotein 32 family member B                     |
| Q78P65 | Rap2A-like protein                                                                |
| D3ZUZ4 | Glycosaminoglycan xylosylkinase                                                   |
| Q4V899 | Transmembrane protein 165                                                         |
| Q5XI34 | Serine/threonine-protein phosphatase 2A 65 kDa regulatory subunit A alpha isoform |
| Q5XI32 | F-actin-capping protein subunit beta                                              |
| Q3KR86 | MICOS complex subunit Mic60                                                       |
| Q5XI31 | GPI transamidase component PIG-S                                                  |
| Q9QYW3 | MOB-like protein phocein                                                          |
| P52555 | Endoplasmic reticulum resident protein 29                                         |
| O88994 | Mitochondrial amidoxime reducing component 2                                      |
| Q5XI38 | Lymphocyte cytosolic protein 1                                                    |
| Q5XI36 | CD97                                                                              |
| G3V9W2 | Tyrosine-protein kinase JAK1                                                      |
| G3V887 | V-type proton ATPase subunit A                                                    |
| B0K010 | Thioredoxin domain-containing 17                                                  |
| M0RDI5 | Mitochondrial calcium uniporter                                                   |



|        |                                                                         |
|--------|-------------------------------------------------------------------------|
| P06765 | Platelet factor 4                                                       |
| P05197 | Elongation factor 2                                                     |
| G3V9X8 | Magnesium transporter protein 1                                         |
| Q6P685 | Eukaryotic translation initiation factor 2 subunit 2                    |
| D3ZD83 | Major facilitator superfamily domain-containing protein 10              |
| P63322 | Ras-related protein Ral-A                                               |
| Q63396 | Activated RNA polymerase II transcriptional coactivator p15             |
| P54313 | Transducin beta-2                                                       |
| F1MA89 | Cyclin Y                                                                |
| P54311 | Transducin beta-1                                                       |
| O70257 | Syntaxin-7                                                              |
| O08984 | Lamin-B receptor                                                        |
| O88767 | Protein/nucleic acid deglycase DJ-1                                     |
| D4AEP0 | Adenylosuccinate synthetase isozyme 2                                   |
| P51577 | P2X purinoceptor 4                                                      |
| D3ZUX5 | MICOS complex subunit MIC-19                                            |
| P35213 | 14-3-3 protein beta/alpha                                               |
| F7FNS3 | Derlin                                                                  |
| O08775 | Vascular endothelial growth factor receptor 2                           |
| Q9EQX9 | Ubiquitin-conjugating enzyme E2 N                                       |
| G3V7P1 | Syntaxin-12                                                             |
| P15865 | Histone H1.4                                                            |
| Q920P6 | Adenosine deaminase                                                     |
| G3V9Y2 | Phospholipid phosphatase 1                                              |
| G3V7Q7 | Ras GTPase-activating-like protein IQGAP1                               |
| Q5EAP4 | Guanine nucleotide binding protein alpha-14                             |
| P63331 | Serine/threonine-protein phosphatase 2A catalytic subunit alpha isoform |
| Q63116 | Mast/stem cell growth factor receptor                                   |
| D3ZSY5 | keratin 84                                                              |
| Q64244 | ADP-ribosyl cyclase/cyclic ADP-ribose hydrolase 1                       |
| P81155 | Voltage-dependent anion-selective channel protein 2                     |
| P21531 | 60S ribosomal protein L3                                                |
| B0BN30 | Mitochondrial carrier homolog 1                                         |
| P31000 | Vimentin                                                                |
| O88777 | Presenilin-2                                                            |
| D3ZL85 | Cytochrome c heme lyase                                                 |
| F7EPH4 | Inorganic Pyrophosphatase                                               |
| Q64654 | Lanosterol 14-alpha demethylase                                         |
| P08644 | GTPase KRas                                                             |
| Q63965 | Sideroflexin-1                                                          |
| B0K031 | 60S ribosomal protein L7, isoform                                       |
| F1LN88 | Aldehyde dehydrogenase                                                  |
| F1M7T6 | Translocon-associated protein subunit gamma                             |
| Q05982 | Nucleoside diphosphate kinase A                                         |

|        |                                                                         |
|--------|-------------------------------------------------------------------------|
| P04897 | Guanine nucleotide-binding protein G(i) subunit alpha-2                 |
| Q8VHF5 | Citrate synthase mitochondrial                                          |
| Q08849 | Syntaxin-3                                                              |
| Q8CFN2 | Cell division control protein 42 homolog (CDC42)                        |
| Q5XI86 | Peptidyl-tRNA hydrolase 2                                               |
| Q8CHN6 | Sphingosine-1-phosphate lyase 1                                         |
| Q08851 | Syntaxin-5                                                              |
| Q63151 | Long chain fatty acid CoA ligase 3                                      |
| Q1H5H1 | Thioredoxin reductase-like selenoprotein T                              |
| D3ZCZ9 | NADH dehydrogenase [ubiquinone] iron-sulfur protein 6                   |
| Q07014 | Tyrosine-protein kinase Lyn                                             |
| Q5XI78 | 2-oxoglutarate dehydrogenase complex component E1                       |
| Q5XI77 | Annexin A11                                                             |
| Q5XI73 | Rho GDP dissociation inhibitor 1                                        |
| P07151 | Beta-2-microglobulin                                                    |
| P07150 | Annexin A1                                                              |
| Q52KJ9 | Thioredoxin-related transmembrane protein 1                             |
| Q64273 | Inward rectifier potassium channel 2                                    |
| Q4QQS6 | Dolichyl-phosphate beta-glucosyltransferase                             |
| B2RYB8 | Integrin beta 2                                                         |
| Q5HZE2 | Transmembrane protein 120 A                                             |
| F1LW77 | Ras-related protein Rab-33b                                             |
| P07153 | Dolichyl-diphosphooligosaccharide protein glycosyltransferase subunit 1 |
| F1LVV4 | Protein RCC2                                                            |
| Q5U362 | Annexin A4                                                              |
| B2RYC9 | Glucosylceramidase                                                      |
| E9PTU4 | Myosin heavy chain 11                                                   |
| P11442 | Clathrin heavy chain 1                                                  |
| Q6QBQ4 | Phospholipid scramblase 3                                               |
| B0BN81 | Ribosomal protein S5                                                    |
| P12075 | Cytochrome c oxidase subunit 5B mitochondrial                           |
| B2GV24 | E3 UFM1-protein ligase 1                                                |
| Q05030 | Platelet-derived growth factor receptor beta                            |
| G3V7L8 | V-type proton ATPase subunit E 1 isoform                                |
| D4A7U6 | U6 snRNA-associated Sm-like protein LSm3                                |
| Q62662 | Tyrosine-protein kinase FRK                                             |
| Q6TEK4 | Vitamin K epoxide reductase complex subunit 1                           |
| D4A7U1 | Zyxin                                                                   |
| Q05962 | ADP/ATP translocase 1                                                   |
| Q6PCU4 | Emerin                                                                  |
| P61972 | Nuclear transport factor 2                                              |
| Q6PCU2 | V-type proton ATPase subunit E 1                                        |
| Q5PQL7 | Integral membrane protein 2C                                            |
| P50475 | Alanine--tRNA ligase cytoplasmic                                        |

|        |                                                                   |
|--------|-------------------------------------------------------------------|
| B2RYD7 | STT3B, catalytic subunit of the oligosaccharyltransferase complex |
| Q810F4 | Protein FAM3C                                                     |
| E9PU78 | Isoform Bcl-X(S) of Bcl-2-like protein 1                          |
| P31044 | Phosphatidylethanolamine-binding protein 1                        |
| E9PU77 | Synaptotagmin-like protein 3                                      |
| Q5RJR8 | Leucine-rich repeat-containing protein 59                         |
| Q9JLH7 | CDK5 regulatory subunit-associated protein 3                      |
| Q4QQV0 | Tubulin beta-6                                                    |
| Q6MGB4 | H2-K region expressed gene 4, rat orthologue                      |
| Q3B7V5 | Ras-related protein Rab-2b                                        |
| G3V7M2 | Integrin beta 7                                                   |
| B1WBW4 | Armadillo repeat-containing protein 10                            |
| D3ZNG3 | Signal peptide peptidase-like 2A                                  |
| Q9Z1J7 | Amino acid transporter                                            |
| G3V9N0 | Polyadenylate-binding protein 4                                   |
| E9PTW1 | Secretory carrier-associated membrane protein                     |
| G3V9N9 | alpha-1,2-Mannosidase                                             |
| Q6MGA3 | Antigen peptide transporter 2                                     |
| Q64232 | Very-long-chain enoyl-CoA reductase                               |
| Q4KM49 | Tyrosine--tRNA ligase cytoplasmic                                 |
| Q5RK10 | 60S ribosomal protein L13a, isoform                               |
| Q5U2V8 | ER membrane protein complex subunit 3                             |
| B1WC50 | RNA-binding protein EWS-like                                      |
| P61227 | Ras-related protein Rap-2b                                        |
| Q63377 | Sodium/potassium-transporting ATPase subunit beta-3               |
| M0RBJ0 | Guanine nucleotide-binding protein gamma-2                        |
| Q64428 | Trifunctional enzyme subunit alpha                                |
| Q63942 | Ras-related protein Rab-3d                                        |
| Q63584 | Transmembrane emp24 domain-containing protein 10                  |
| Q5PQM0 | Transmembrane protein 168                                         |
| Q6EV76 | Alpha-(1,6)-fucosyltransferase                                    |
| F1LU48 | Endoplasmic reticulum-golgi intermediate compartment 1            |
| Q63945 | Protein SET                                                       |
| D4A9X7 | Hypermethylated in cancer 2 protein                               |
| P32551 | Cytochrome b-c1 complex subunit 2 mitochondrial                   |
| B0BN52 | Mitochondrial carrier homolog 2                                   |
| E9PTX9 | Solute carrier family 12 member 2                                 |
| P61621 | SEC61 alpha-1                                                     |
| B1WC67 | Solute carrier family 25 member 24                                |
| F1LRK1 | Sodium/potassium-transporting ATPase subunit alpha                |
| Q7TSA0 | Mitochondrial Rho GTPase 2                                        |
| B1WC61 | Acyl-CoA dehydrogenase family member 9                            |
| O89035 | Solute carrier family 25 member 10                                |
| Q9WVB1 | Ras-related protein Rab-6a                                        |

|        |                                                                   |
|--------|-------------------------------------------------------------------|
| Q62839 | Golgin subfamily A member 2                                       |
| B2RYG6 | Ubiquitin thioesterase OTUB1                                      |
| Q3T1K5 | F-actin-capping protein subunit alpha-2                           |
| Q7TP42 | Translocation protein SEC62                                       |
| P68370 | Tubulin alpha-1A                                                  |
| Q5U316 | Ras-related protein Rab-35                                        |
| D3ZF97 | Endoplasmic reticulum lectin 1                                    |
| P11167 | Solute carrier family 2, facilitated glucose transporter member 1 |
| P04642 | L-lactate dehydrogenase A chain                                   |
| P62828 | GTP-binding nuclear protein Ran                                   |
| P70583 | Deoxyuridine 5'-triphosphate nucleotidohydrolase                  |
| P70580 | Membrane-associated progesterone receptor component 1             |
| P23358 | 60S ribosomal protein L12                                         |
| Q3T1J1 | Eukaryotic translation initiation factor 5A-1                     |
| D4AEG2 | Ras-related protein Rab-32                                        |
| Q6P3V9 | 60S ribosomal protein L4                                          |
| Q6P3V8 | Eukaryotic initiation factor 4A-I                                 |
| F1LP82 | Ras-related protein Rab-2a                                        |
| Q62636 | Ras-related protein Rap-1b                                        |
| Q3MIE4 | Synaptic vesicle membrane protein VAT-1 homolog                   |
| P04636 | Malate dehydrogenase mitochondrial                                |
| G3V7I3 | Manganese-transporting ATPase 13A1                                |
| Q5U300 | Ubiquitin-like modifier-activating enzyme 1                       |
| G3V7I0 | Peroxiredoxin-3                                                   |
| P62815 | V-type proton ATPase subunit B                                    |
| Q4KLL4 | Transmembrane 9 superfamily member 4                              |
| Q63198 | Contactin 1                                                       |
| Q0R3W9 | GTPase, IMAP family member 1                                      |
| D3ZAY7 | Band 4.1-like protein 2                                           |
| E9PT29 | ATP-dependent RNA helicase DDX17                                  |
| Q925S8 | ATP-dependent zinc metalloprotease YME1L1                         |
| O88941 | Mannosyl-oligosaccharide glucosidase                              |
| Q4V7D9 | Acid sphingomyelinase-like phosphodiesterase 3B                   |
| Q6S395 | Plectin                                                           |
| F1LMP7 | Granulins                                                         |
| Q3B7U9 | Peptidyl-prolyl cis-trans isomerase FKBP8                         |
| Q5XI04 | Erythrocyte band 7 integral membrane protein                      |
| Q4V7D1 | Translocon-associated protein subunit alpha                       |
| P62804 | Histone H4                                                        |
| P12001 | 60S ribosomal protein L18                                         |
| G3V7J7 | Eukaryotic translation initiation factor 5A-2                     |
| Q2YDU8 | Protein spinster homolog 1                                        |
| P12928 | Pyruvate kinase PKLR                                              |
| P13832 | Myosin regulatory light chain RLC-A                               |

|        |                                                               |
|--------|---------------------------------------------------------------|
| G3V9S3 | Tyrosine-protein phosphatase non-receptor type 13             |
| B1WBY5 | DnaJ homolog subfamily C member 11                            |
| Q62658 | Peptidyl-prolyl cis-trans isomerase FKBP1A                    |
| Q5EAJ6 | Inhibitor kappa-B kinase-interacting protein                  |
| B1WBY7 | Erlin-1                                                       |
| D4A5K6 | Zinc metalloproteinase STE24                                  |
| P13838 | Leukosialin                                                   |
| G3V637 | Syntaxin-binding protein 2, isoform                           |
| M0RD75 | 40S ribosomal protein S6                                      |
| Q505J9 | ATPase family AAA domain-containing protein 1                 |
| P62859 | 40S ribosomal protein S28                                     |
| Q6IN24 | Galectin-8                                                    |
| Q6PEC3 | Protein YIF1B                                                 |
| Q6IFV6 | Keratin 35                                                    |
| F1LMK0 | A-kinase anchoring protein 1 isoform 2                        |
| P09895 | 60S ribosomal protein L5                                      |
| D3ZKB9 | Teashirt homolog 3                                            |
| P24049 | 60S ribosomal protein L17                                     |
| P10111 | Peptidyl-prolyl cis-trans isomerase A                         |
| Q5XIE0 | Acidic leucine-rich nuclear phosphoprotein 32 family member E |
| Q4FZT0 | Stomatin-like protein 2                                       |
| P62260 | 14-3-3 protein epsilon                                        |
| Q5XIE8 | Integral membrane protein 2B                                  |
| Q6IG03 | Keratin, type II cytoskeletal 73                              |
| Q6IG02 | Keratin, type II cytoskeletal 2 epidermal                     |
| Q6IG01 | Keratin, type II cytoskeletal 1B                              |
| Q6IG00 | Keratin, type II cytoskeletal 4                               |
| Q3SWT0 | Platelet endothelial cell adhesion molecule (Pecam1)          |
| Q6IN10 | Endothelin-converting enzyme 1 Isoform                        |
| Q6IG05 | Keratin, type II cytoskeletal 75                              |
| Q6IFW6 | Keratin, type I cytoskeletal 10                               |
| P09495 | Tropomyosin alpha-4                                           |
| Q5XIF6 | Tubulin alpha-4A                                              |
| F1M0J3 | Sodium bicarbonate cotransporter 3, isophorm 4                |
| P62250 | 40S ribosomal protein S16                                     |
| Q91Y81 | Septin-2                                                      |
| P62634 | Cellular nucleic acid-binding protein                         |
| P70550 | Ras-related protein Rab-8b                                    |
| Q99P74 | Ras-related protein Rab-27b                                   |
| Q99P75 | Ras-related protein Rab-9a                                    |
| Q6IG12 | Keratin, type II cytoskeletal 7                               |
| P35704 | Peroxiredoxin-2                                               |
| Q2I6B2 | V-type proton ATPase subunit A1                               |
| Q2I6B1 | V-type proton ATPase subunit A2                               |

|        |                                                                   |
|--------|-------------------------------------------------------------------|
| P62630 | Elongation factor 1-alpha 1                                       |
| F1LMM5 | Arachidonate 5-lipoxygenase                                       |
| P62246 | 40S ribosomal protein S15a                                        |
| P62832 | 60S ribosomal protein L23                                         |
| P05712 | Ras-related protein Rab-2a                                        |
| D4A6A2 | Heterogeneous nuclear ribonucleoprotein A3-like                   |
| P62836 | Ras-related protein Rap-1a                                        |
| P62243 | 40S ribosomal protein S8                                          |
| E9PSV5 | Phosphoserine aminotransferase                                    |
| Q01827 | Vesicular amine transporter 2                                     |
| Q63413 | Spliceosome RNA helicase Ddx39b                                   |
| Q5BJK8 | Golgi integral membrane protein 4                                 |
| P36370 | Antigen peptide transporter 1                                     |
| P82995 | Heat shock protein HSP 90-alpha                                   |
| Q6IN37 | GM2 ganglioside activator                                         |
| Q5XID0 | Protein YIPF5                                                     |
| P05708 | Hexokinase-1                                                      |
| P80254 | D-dopachrome decarboxylase                                        |
| Q63610 | Tropomyosin alpha-3                                               |
| Q6IFZ5 | Keratin, type II cytoskeletal 2 oral                              |
| Q5VLR5 | Endoplasmic reticulum resident protein 44                         |
| B4F7C9 | STT3A, catalytic subunit of the oligosaccharyltransferase complex |
| Q5HZY0 | Erasin                                                            |
| Q5XID7 | Armadillo repeat-containing X-linked protein 3                    |
| B4F7C2 | Tubulin beta-4A                                                   |
| E9PT65 | Radixin                                                           |
| P58405 | Striatin-3                                                        |
| Q6MG61 | Chloride intracellular channel protein 1                          |
| Q498C8 | Protein RER1                                                      |
| Q6TXF3 | Acyl-CoA-binding protein                                          |
| B2RZ27 | SH3 domain-binding glutamic acid-rich-like protein 3              |
| F1LMG7 | Leucine-rich repeat-containing protein 7                          |
| B2RYQ2 | Serine/threonine-protein phosphatase 2A activator                 |
| E9PU37 | Palmitoyltransferase                                              |
| P05982 | NAD(P)H dehydrogenase [quinone] 1                                 |
| Q04462 | Valine--tRNA ligase                                               |
| P62898 | Cytochrome c somatic                                              |
| P04166 | Cytochrome b5 type B                                              |
| P69897 | Tubulin beta-5                                                    |
| Q642E3 | CDK5 regulatory subunit-associated protein 3, isoform             |
| Q5U2X6 | Coiled-coil domain-containing protein 47                          |
| P62890 | 60S ribosomal protein L30                                         |
| P63095 | Guanine nucleotide-binding protein G(s) subunit alpha             |
| P20291 | Arachidonate 5-lipoxygenase-activating protein                    |

|        |                                                         |
|--------|---------------------------------------------------------|
| P52296 | Importin subunit beta-1                                 |
| D3ZTJ0 | Protein XRP2                                            |
| Q4QRB4 | Tubulin beta-3                                          |
| D4A1D8 | Surfeit 4                                               |
| Q6P9V9 | Tubulin alpha-1B                                        |
| M0RCS2 | Transducin beta-like protein 2                          |
| D4A7Y9 | Essential MCU regulator, mitochondrial                  |
| Q5PQX1 | Torsin-1A-interacting protein 1                         |
| Q6P9V1 | CD81 molecule                                           |
| Q63635 | Syntaxin-6                                              |
| Q5RJM1 | 3-oxo-5-alpha-steroid 4-dehydrogenase 3                 |
| P13221 | Aspartate aminotransferase cytoplasmic                  |
| Q09073 | ADP/ATP translocase 2                                   |
| P54921 | Alpha-soluble NSF attachment protein (SNAP-alpha)       |
| P25113 | Phosphoglycerate mutase 1                               |
| P09626 | Potassium-transporting ATPase alpha chain 1             |
| D3ZG43 | NADH dehydrogenase (ubiquinone) iron-sulfur protein 3   |
| P61983 | 14-3-3 protein gamma                                    |
| Q794E4 | Heterogeneous nuclear ribonucleoprotein F               |
| P49242 | 40S ribosomal protein S3a                               |
| Q75WE7 | Von Willebrand factor A domain-containing protein 5A    |
| BOBNA5 | Coactosin-like protein                                  |
| P02401 | 60S acidic ribosomal protein P2                         |
| F7FKI5 | Pyruvate dehydrogenase component E1 alpha               |
| Q5U2Z8 | Elongation of very long chain fatty acids protein 1     |
| Q5XIG4 | OCIA domain-containing protein 1                        |
| P48500 | Triosephosphate isomerase                               |
| Q5U2Z3 | Nucleosome assembly protein 1-like 4                    |
| Q5SGE0 | Leucine-rich PPR motif-containing protein mitochondrial |
| P23640 | Ras-related protein Rab-27a                             |
| Q4V8F3 | Rhomboid-related protein 4                              |
| O70595 | ATP-binding cassette sub-family B member 6              |
| B5DF51 | Membrane magnesium transporter 1                        |
| Q6IFU9 | keratin 16                                              |
| Q6P9T8 | Tubulin beta-4B                                         |
| Q6IFU8 | Keratin, type I cytoskeletal 17                         |
| Q5RJK5 | Chromobox 3                                             |
| P04157 | Receptor-type tyrosine-protein phosphatase C (CD45)     |
| G3V7A5 | Low density lipoprotein receptor isoform                |
| Q6IFV3 | Keratin, type I cytoskeletal 15                         |
| Q6IFV1 | Keratin, type I cytoskeletal 14                         |
| Q5XIH3 | NADH dehydrogenase [ubiquinone] flavoprotein 1          |
| P20070 | NADH-cytochrome b5 reductase 3                          |
| Q6MG49 | Large proline-rich protein BAG6                         |

|        |                                                                         |
|--------|-------------------------------------------------------------------------|
| Q5XIH7 | Prohibitin 2                                                            |
| P11348 | Dihydropteridine reductase                                              |
| D3ZP98 | Minor histocompatibility antigen H13                                    |
| D4A465 | Ragulator complex protein LAMTOR2                                       |
| Q5I0G4 | Glycine--tRNA ligase                                                    |
| Q642A2 | Type-1 angiotensin II receptor-associated protein                       |
| Q6AZ61 | Probable lysosomal cobalamin transporter                                |
| Q5M843 | 2-oxoglutarate and iron-dependent oxygenase domain-containing protein 3 |
| Q00238 | Intercellular adhesion molecule 1 (ICAM1)                               |
| Q6AY20 | Cation-dependent mannose-6-phosphate receptor                           |
| D3ZMR1 | Translocase of outer mitochondrial membrane 7                           |
| Q6AXQ0 | SUMO-activating enzyme subunit 1                                        |
| Q6AY18 | GTP-binding protein SAR1a                                               |
| P19804 | Nucleoside diphosphate kinase B                                         |
| B0BNG0 | ER membrane protein complex subunit 2                                   |
| B0BNG3 | Vesicular integral-membrane protein VIP36                               |
| Q5M7T4 | Protein YIPF4                                                           |
| Q5I0H4 | Calcium load-activated calcium channel (CLAC channel)                   |
| Q561S0 | NADH dehydrogenase [ubiquinone] 1 alpha subcomplex subunit 10           |
| Q6NYB7 | Ras-related protein Rab-1a                                              |
| G3V8Z1 | Linker for activation of T-cells family member 2 (NTAL)                 |
| P19814 | Trans-Golgi network integral membrane protein TGN38                     |
| P17074 | 40S ribosomal protein S19                                               |
| Q5M7T6 | V-type proton ATPase subunit D 1                                        |
| B5DEN5 | Eukaryotic translation elongation factor 1 beta 2                       |
| P84903 | Stromal interaction molecule 1 (STIM1)                                  |
| P63245 | Receptor of activated protein C kinase 1 (RACK1)                        |
| Q8SEZ5 | Cytochrome c oxidase subunit 2                                          |
| A1L134 | Ancient ubiquitous protein 1                                            |
| Q32PX6 | Rho-related GTP-binding protein RhoG                                    |
| P05426 | 60S ribosomal protein L7                                                |
| Q01621 | Tyrosine-protein kinase LCK                                             |
| Q6AXN3 | Transmembrane emp24 domain-containing protein 5                         |
| F1LZX9 | Integrin alpha 5                                                        |
| Q9JJ19 | Na(+)/H(+) exchange regulatory cofactor NHE-RF1                         |
| Q4V8C2 | Centromere/kinetochore protein zw10 homolog                             |
| D3Z9L0 | Acylglycerol kinase                                                     |
| Q6MG08 | ATP-binding cassette sub-family F member 1                              |
| P63269 | Actin gamma-enteric smooth muscle                                       |
| D4AD37 | Inositol monophosphatase 3                                              |
| P15429 | Beta-enolase                                                            |
| Q63692 | Hsp90 co-chaperone Cdc37                                                |
| P97675 | Ectonucleotide pyrophosphatase/phosphodiesterase family member 3        |
| Q5XIA8 | Growth hormone-inducible transmembrane protein                          |



|        |                                                           |
|--------|-----------------------------------------------------------|
| P0C5H9 | Mesencephalic astrocyte-derived neurotrophic factor       |
| Q5M7W6 | Protein FAM234A                                           |
| G3V6W2 | Prolactin regulatory element-binding protein              |
| P35289 | Ras-related protein Rab-15                                |
| Q4FZX7 | Signal recognition particle receptor beta                 |
| D3ZZR9 | Peptidylprolyl isomerase                                  |
| P63018 | Heat shock cognate 71 kDa protein                         |
| Q5XIA1 | Nicalin                                                   |
| P63012 | Ras-related protein Rab-3a                                |
| P35565 | Calnexin                                                  |
| Q9R0C5 | Polypeptide N-acetylgalactosaminyltransferase 7           |
| G3V784 | ADP-dependent glucokinase                                 |
| B0BNK1 | Ras-related protein Rab-5c                                |
| Q75Q41 | Mitochondrial import receptor subunit TOM22 homolog       |
| Q9Z1Z1 | Eukaryotic translation initiation factor 2-alpha kinase 3 |
| P17046 | Lysosome-associated membrane glycoprotein 2 (Lamp2)       |
| P35571 | Glycerol-3-phosphate dehydrogenase mitochondrial          |
| O70521 | Regulator of G-protein signaling 19                       |
| D3ZDR2 | Charged multivesicular body protein 6                     |
| E9PTI1 | V-type proton ATPase subunit H                            |
| P85108 | Tubulin beta-2A                                           |
| Q9WTR7 | SEC11 homolog C                                           |
| F1LX07 | Solute carrier family 25 member 12                        |
| D3ZZS8 | V-type proton ATPase subunit B, kidney isoform            |
| D4AAE9 | CDGSH iron-sulfur domain-containing protein 2             |
| P26453 | Basigin                                                   |
| Q08163 | Adenylyl cyclase-associated protein 1                     |
| B0BNL4 | Heme transporter HRG1                                     |
| Q5M860 | Rho GDP dissociation inhibitor 2                          |
| Q8CGU6 | Nicastrin                                                 |
| P63039 | 60 kDa heat shock protein                                 |
| A0JN29 | Lunapark ER junction formation factor                     |
| D4A3S8 | NOL1/NOP2/Sun domain family member 2                      |
| Q6IRF8 | V-type proton ATPase subunit S1                           |
| B5DEL8 | NADH dehydrogenase (Ubiquinone) iron-sulfur protein 5     |
| P35952 | Low-density lipoprotein receptor                          |
| Q9Z1X1 | Extended synaptotagmin 1                                  |
| P14562 | Lysosome-associated membrane glycoprotein 1 (Lamp1)       |
| Q91ZQ0 | Vacuole membrane protein 1                                |
| P27881 | Hexokinase-2                                              |
| P49432 | Pyruvate dehydrogenase component E1 beta                  |
| D3ZP13 | Sulfhydryl oxidase 2                                      |
| Q9ER34 | Aconitate hydratase mitochondrial                         |
| Q3B7D2 | Serine palmitoyltransferase 2                             |

|        |                                                                     |
|--------|---------------------------------------------------------------------|
| P63025 | VAMP3                                                               |
| Q6IMF3 | Keratin, type II cytoskeletal 1                                     |
| A0JN30 | Canopy 2 homolog                                                    |
| D3ZFK5 | Signal peptidase complex subunit 1                                  |
| Q920J4 | Thioredoxin-like protein 1                                          |
| B0BNJ1 | Sorcin                                                              |
| P19627 | Guanine nucleotide-binding protein G(z) subunit alpha               |
| G3V9A3 | 14-3-3 protein sigma                                                |
| P35280 | Ras-related protein Rab-8a                                          |
| Q62720 | Zinc transporter 1                                                  |
| D3ZAF6 | ATP synthase subunit F mitochondrial                                |
| Q5BK85 | Transmembrane emp24 domain-containing protein 1                     |
| Q6P503 | V-type proton ATPase subunit D                                      |
| Q5XIU9 | Membrane-associated progesterone receptor component 2               |
| B5DEH2 | Erlin-2                                                             |
| F1M2P8 | Protein kinase C alpha                                              |
| Q62726 | Serine/threonine-protein kinase ICK                                 |
| P21961 | Mast cell carboxypeptidase A                                        |
| Q5XIU4 | B-cell receptor-associated protein 29                               |
| P26772 | 10 kDa heat shock protein mitochondrial                             |
| Q5U204 | Ragulator complex protein LAMTOR3                                   |
| Q6AYM8 | Glycosylphosphatidylinositol anchor attachment 1                    |
| D3ZTX0 | Transmembrane emp24 domain-containing protein 7                     |
| P50503 | Hsc70-interacting protein                                           |
| P06686 | Sodium/potassium-transporting ATPase subunit alpha-2                |
| P06687 | Sodium/potassium-transporting ATPase subunit alpha-3                |
| O08623 | Sequestosome-1                                                      |
| P06685 | Sodium/potassium-transporting ATPase subunit alpha-1                |
| G3V993 | SAM domain, SH3 domain and nuclear localization signals, 1 (SAMNS1) |
| Q62733 | Lamina-associated polypeptide 2 isoform beta                        |
| F1M8X9 | Golgi brefeldin A-resistant guanine nucleotide exchange factor 1    |
| Q6AYN2 | Store-operated calcium entry-associated regulatory factor (SARAF)   |
| G3V6H5 | Solute carrier family 25 member 11                                  |
| G3V6H0 | Ras-related protein Rab-1b                                          |
| P27139 | Carbonic anhydrase 2                                                |
| Q66H50 | Fatty acyl-CoA reductase 1                                          |
| D3ZJS3 | Translocase of outer mitochondrial membrane 6                       |
| Q9ES40 | PRA1 family protein 3                                               |
| P61589 | Transforming protein RhoA                                           |
| P67779 | Prohibitin                                                          |
| Q5FVF4 | Transmembrane 7 superfamily member 3                                |
| Q5BJY9 | Keratin, type I cytoskeletal 18                                     |
| G3V6G5 | F-box-like/WD repeat-containing protein TBL1X                       |
| Q62991 | Syntaxin-binding protein 1-like 2                                   |

|        |                                                                 |
|--------|-----------------------------------------------------------------|
| O08651 | D-3-phosphoglycerate dehydrogenase                              |
| O88884 | A-kinase anchor protein 1, mitochondrial                        |
| P11762 | Galectin-1                                                      |
| A1L1L6 | Mitochondrial Rho GTPase 1                                      |
| Q6AYK6 | Calcyclin-binding protein                                       |
| F1LT70 | Pantothenate kinase 2                                           |
| Q66H21 | Cholinephosphotransferase 1                                     |
| D3ZYM4 | Macrophage stimulating 1 receptor                               |
| P07943 | Aldose reductase                                                |
| P32089 | Citrate transport protein                                       |
| M0RCF3 | Integrin beta 3                                                 |
| G3V8V4 | Ceramide synthase 2                                             |
| P97887 | Presenilin-1                                                    |
| P83732 | 60S ribosomal protein L24                                       |
| Q5XIV1 | Phosphoglycerate kinase 2                                       |
| Q5BJZ3 | Nicotinamide nucleotide transhydrogenase                        |
| P04764 | Alpha-enolase                                                   |
| Q10758 | Keratin, type II cytoskeletal 8                                 |
| Q07936 | Annexin A2                                                      |
| Q64578 | Sarcoplasmic/endoplasmic reticulum calcium ATPase 1 (SERCA1)    |
| Q9R1Z0 | Voltage-dependent anion-selective channel protein 3             |
| P85968 | 6-phosphogluconate dehydrogenase decarboxylating                |
| Q6AYQ9 | Peptidyl-prolyl cis-trans isomerase C                           |
| Q6PDU1 | Serine/arginine-rich splicing factor 2                          |
| Q6AYQ4 | Transmembrane protein 109                                       |
| Q64541 | Sodium/potassium-transporting ATPase subunit alpha-4            |
| P34058 | Heat shock protein HSP 90-beta                                  |
| D3ZJX5 | Mitochondrial import inner membrane translocase subunit TIM50   |
| Q66H80 | Coatomer subunit delta                                          |
| P47819 | Glial fibrillary acidic protein                                 |
| Q91ZN1 | Coronin-1A                                                      |
| P04785 | Protein disulfide-isomerase                                     |
| Q63016 | Large neutral amino acids transporter small subunit 1           |
| O35165 | Golgi SNAP receptor complex member 2                            |
| R9PXR4 | Mitochondrial import receptor subunit TOM70                     |
| P85971 | 6-phosphogluconolactonase                                       |
| P12368 | cAMP-dependent protein kinase type II-alpha regulatory subunit  |
| Q9WU70 | Syntaxin-binding protein 5                                      |
| Q5I0E7 | Transmembrane emp24 domain-containing protein 9                 |
| Q9Z2Q7 | Syntaxin-8                                                      |
| A1L1J8 | Ras-related protein Rab-5b                                      |
| F1LM33 | Leucine-rich PPR motif-containing protein mitochondrial isoform |
| P38983 | 40S ribosomal protein SA                                        |
| O35987 | NSFL1 cofactor p47                                              |

|        |                                                                         |
|--------|-------------------------------------------------------------------------|
| A1L1J9 | Lipase maturation factor 2                                              |
| F7FFV2 | keratin 5                                                               |
| F1LQR8 | Inositol 1,4,5-trisphosphate receptor type 2                            |
| P21708 | Mitogen-activated protein kinase 3                                      |
| P04797 | Glyceraldehyde-3-phosphate dehydrogenase                                |
| O35567 | Bifunctional purine biosynthesis protein PURH                           |
| G3V936 | Citrate synthase                                                        |
| F1LZW6 | Solute carrier family 25 member 13                                      |
| Q9EPV5 | Apoptotic protease-activating factor 1                                  |
| Q5I0D1 | Glyoxalase domain-containing protein 4                                  |
| Q53B90 | Ras-related protein Rab-43                                              |
| P58195 | Phospholipid scramblase 1                                               |
| Q9JHW5 | VAMP7                                                                   |
| Q9JI85 | Nucleobindin-2                                                          |
| D4A2H2 | Serine palmitoyltransferase 1                                           |
| P01830 | Thy-1 membrane glycoprotein                                             |
| O70377 | Synaptosomal-associated protein 23 (SNAP-23)                            |
| Q68FP1 | Gelsolin                                                                |
| D4A133 | V-type proton ATPase catalytic subunit A                                |
| F1LNX2 | Calcium release-activated calcium channel protein 1 (Orai1)             |
| P21913 | Succinate dehydrogenase [ubiquinone] iron-sulfur subunit mitochondrial  |
| P51146 | Ras-related protein Rab-4b                                              |
| D3ZIJ5 | Dolichyl-phosphate mannosyltransferase subunit 3                        |
| D3ZK56 | Ras-related protein Rap-2c                                              |
| Q07984 | Translocon-associated protein subunit delta                             |
| P31977 | Ezrin                                                                   |
| P15999 | ATP synthase subunit alpha mitochondrial                                |
| M0RCA3 | Zinc finger protein-like 1                                              |
| Q6AYQ1 | Golgin subfamily A member 7                                             |
| P60711 | Actin cytoplasmic 1                                                     |
| O35353 | Transducin beta-4                                                       |
| Q9Z2S9 | Flotillin-2                                                             |
| Q9ES21 | Phosphatidylinositol phosphatase SAC1                                   |
| Q9Z2L0 | Voltage-dependent anion-selective channel protein 1                     |
| Q68FR6 | Elongation factor 1-gamma                                               |
| P25235 | Dolichyl-diphosphooligosaccharide protein glycosyltransferase subunit 2 |
| P51635 | Alcohol dehydrogenase [NADP(+)]                                         |
| F1LM82 | Heterogeneous nuclear ribonucleoproteins A2/B1                          |
| B2RZD1 | Protein transport protein Sec61 subunit beta                            |
| Q5PPL3 | Sterol-4-alpha-carboxylate 3-dehydrogenase decarboxylating              |
| P11951 | Cytochrome c oxidase subunit 6C2                                        |
| Q5XIM7 | Lysine--tRNA ligase                                                     |
| P61107 | Ras-related protein Rab-14                                              |
| Q5XIM5 | Protein CDV3 homolog                                                    |

|        |                                                                          |
|--------|--------------------------------------------------------------------------|
| P20793 | Serine/threonine-protein kinase MAK                                      |
| F1LPV0 | Asparagine--tRNA ligase, cytoplasmic                                     |
| M0R9L0 | Nascent polypeptide-associated complex subunit alpha                     |
| P49134 | Integrin beta 1                                                          |
| G3V712 | keratin 7                                                                |
| Q68FQ0 | T-complex protein 1 epsilon                                              |
| D4A781 | Importin 5                                                               |
| G3V8Q1 | Coatomer subunit epsilon                                                 |
| F1M790 | Prostaglandin F2 receptor negative regulator                             |
| O35532 | Methylsterol monooxygenase 1                                             |
| F1LQ81 | Vesicle-fusing ATPase                                                    |
| Q63269 | Inositol 1,4,5-trisphosphate receptor type 3                             |
| D4A0T0 | NADH dehydrogenase 1 beta subcomplex subunit 10                          |
| Q6AYF6 | Glycosyltransferase 8 domain-containing protein 1                        |
| G3V6P8 | Guanine nucleotide-binding protein gamma-12                              |
| G3V6P7 | Myosin heavy chain 9                                                     |
| Q04970 | GTPase NRas                                                              |
| Q9WUD2 | Transient receptor potential cation channel subfamily V member 2 (TRPV2) |
| R9PXU4 | Thioredoxin reductase 1 cytoplasmic                                      |
| F1LM66 | 116 kDa U5 small nuclear ribonucleoprotein component                     |
| F1LSN4 | Fibroblast growth factor receptor                                        |
| D4ADE8 | ATP-dependent RNA helicase DDX3X                                         |
| O88600 | Heat shock 70 kDa protein 4                                              |
| Q794F9 | 4F2 cell-surface antigen heavy chain                                     |
| F1LNT8 | VAMP8                                                                    |
| Q6P791 | Ragulator complex protein LAMTOR1                                        |
| F1M6W2 | Endoplasmic reticulum metalloproteinase 1                                |
| Q6P799 | Serine--tRNA ligase cytoplasmic                                          |
| D4A0W1 | ER membrane protein complex subunit 4                                    |
| P62703 | 40S ribosomal protein S4, X isoform                                      |
| P62909 | 40S ribosomal protein S3                                                 |
| O35796 | Complement component 1 Q subcomponent-binding protein mitochondrial      |
| Q6AYC4 | Macrophage-capping protein                                               |
| P62907 | 60S ribosomal protein L10a                                               |
| P48721 | Mortalin                                                                 |
| P10960 | Prosaposin                                                               |
| Q5XIM9 | T-complex protein 1 beta                                                 |
| D4ADD7 | Glutaredoxin 5                                                           |
| F1M779 | Clathrin heavy chain                                                     |
| P05065 | Fructose-bisphosphate aldolase A                                         |
| P0C1Q3 | Lysophosphatidylcholine acyltransferase 2                                |
| Q5XFX0 | Transgelin-2                                                             |
| Q5BK32 | FAS-associated factor 2                                                  |
| P50398 | Rab GDP dissociation inhibitor alpha                                     |

|        |                                                                            |
|--------|----------------------------------------------------------------------------|
| P61805 | Dolichyl-diphosphooligosaccharide protein glycosyltransferase subunit DAD1 |
| P53987 | Monocarboxylate transporter 1                                              |
| G3V908 | keratin, type II Kb15                                                      |
| Q5XIN6 | Mitochondrial proton/calcium exchanger protein                             |
| P09811 | Glycogen phosphorylase liver form                                          |
| A2VD12 | Pre-B-cell leukemia transcription factor-interacting protein 1             |
| G3V6N2 | Transmembrane emp24 domain-containing protein 4                            |
| P20788 | Cytochrome b-c1 complex subunit Rieske                                     |
| Q62902 | Lectin mannose-binding 1                                                   |
| O88813 | Long chain fatty acid CoA ligase 5                                         |
| P28494 | Alpha-mannosidase 2                                                        |
| P61131 | Beta-galactoside alpha-2,3-sialyltransferase 4                             |
| Q6PDV6 | 40S ribosomal protein S14                                                  |
| P50399 | Rab GDP dissociation inhibitor beta                                        |
| Q6PDV7 | 60S ribosomal protein L10                                                  |
| Q6AYD3 | Proliferation-associated protein 2G4                                       |
| Q7TQ86 | Ac1158                                                                     |
| Q05175 | Brain acid soluble protein 1                                               |
| M0R402 | Protein disulfide-isomerase TMX3                                           |
| P62278 | 40S ribosomal protein S13                                                  |
| D3ZIE9 | Delta-1-pyrroline-5-carboxylate synthase                                   |
| P62138 | Serine/threonine-protein phosphatase PP1-alpha catalytic subunit           |
| Q68FV6 | Glycosylated lysosomal membrane protein                                    |
| Q68FV1 | Trimeric intracellular cation channel type B (TRIC-B)                      |
| P31399 | ATP synthase subunit D mitochondrial                                       |
| G3V8L7 | Integrin alpha M                                                           |
| D4A720 | Serine/arginine-rich splicing factor 7 isoform 2                           |
| Q62762 | Casein kinase I isoform gamma-2                                            |
| D4A4J3 | Alpha-mannosidase 2x                                                       |
| Q62763 | Casein kinase I isoform gamma-3                                            |
| O35509 | Ras-related protein Rab-11b                                                |
| Q62761 | Casein kinase I isoform gamma-1                                            |
| D4A0Y9 | Phosphatidylcholine translocator ABCB4                                     |
| Q6AYI1 | Probable ATP-dependent RNA helicase DDX5                                   |
| Q62764 | Y-box-binding protein 3                                                    |
| D4ABY2 | Coatomer subunit gamma 2                                                   |
| F7EWC1 | Vasodilator-stimulated phosphoprotein                                      |
| Q66HA6 | ADP-ribosylation factor-like protein 8B                                    |
| G3V6T7 | Protein disulfide-isomerase A4                                             |
| P11598 | Protein disulfide-isomerase A3                                             |
| P62282 | 40S ribosomal protein S11                                                  |
| Q66HA4 | Tax1-binding protein 1 homolog                                             |
| G3V6T1 | Coatomer subunit alpha                                                     |
| Q5XIP2 | GPI-anchor transamidase                                                    |

|        |                                                                     |
|--------|---------------------------------------------------------------------|
| Q6P742 | Proteolipid protein 2                                               |
| P62914 | 60S ribosomal protein L11                                           |
| P50339 | Chymase 1                                                           |
| Q5M9I5 | Cytochrome b-c1 complex subunit 6 mitochondrial                     |
| Q9Z122 | Acyl-CoA 6-desaturase                                               |
| Q5XIP9 | Transmembrane protein 43 (Protein LUMA)                             |
| Q5XIP6 | Flap endonuclease 1                                                 |
| Q9JID2 | Guanine nucleotide-binding protein alpha-11                         |
| P11980 | Pyruvate kinase PKM                                                 |
| Q9Z2J5 | VAMP5                                                               |
| A3RLA8 | Low affinity immunoglobulin gamma Fc region receptor II             |
| P10719 | ATP synthase subunit beta mitochondrial                             |
| Q6URK4 | Heterogeneous nuclear ribonucleoprotein A3                          |
| G3V741 | Solute carrier family 25 member 3                                   |
| O54980 | Synaptogyrin-2                                                      |
| Q6P6T6 | Cathepsin D                                                         |
| Q68FX4 | Hematopoietic cell-specific LYN substrate 1 (hcls1)                 |
| F1LQ92 | Sel-1 homolog 1                                                     |
| F1LQJ7 | Phosphoenolpyruvate carboxykinase [GTP], mitochondrial              |
| Q9R1T1 | Barrier-to-autointegration factor                                   |
| D4AA91 | Ceramide synthase 5                                                 |
| P22734 | Catechol O-methyltransferase                                        |
| Q63486 | Ras-related GTP-binding protein A (Rag A)                           |
| Q63483 | Ras-related protein Rab-38                                          |
| F1LM93 | Tyrosine-protein kinase Yes                                         |
| Q9JKB7 | Guanine deaminase                                                   |
| Q63083 | Nucleobindin-1                                                      |
| Q63085 | Cyclic GMP-inhibited phosphodiesterase B                            |
| D4A994 | ER membrane protein complex subunit 1                               |
| Q63081 | Protein disulfide-isomerase A6                                      |
| P17425 | Hydroxymethylglutaryl-CoA synthase cytoplasmic                      |
| Q62940 | E3 ubiquitin-protein ligase NEDD4                                   |
| P68255 | 14-3-3 protein theta                                                |
| Q63803 | Guanine nucleotide-binding protein G(s) subunit alpha isoforms XLas |
| Q6P6U0 | Tyrosine-protein kinase Fgr                                         |
| F1M2K3 | Small ubiquitin-related modifier                                    |
| Q62753 | Syntaxin-binding protein 2                                          |
| P00388 | NADPH--cytochrome P450 reductase                                    |
| Q06647 | ATP synthase subunit O mitochondrial                                |
| G3V8I4 | Syntaxin-4A                                                         |
| Q68FY0 | Cytochrome b-c1 complex subunit 1 mitochondrial                     |
| Q63507 | 60S ribosomal protein L14                                           |
| D3ZNS8 | Aladin                                                              |
| G3V679 | Transferrin receptor protein 1                                      |

|        |                                                                        |
|--------|------------------------------------------------------------------------|
| P29995 | Inositol 1,4,5-trisphosphate receptor type 2                           |
| B2GUZ9 | Fam49b protein                                                         |
| Q9Z0V6 | Thioredoxin-dependent peroxide reductase mitochondrial                 |
| D3ZSA9 | Nodal modulator 1                                                      |
| D3ZWS0 | Protein scribble homolog                                               |
| P62963 | Profilin-1                                                             |
| Q66HD0 | Endoplasmin                                                            |
| G3V8G5 | Golgi apparatus protein 1                                              |
| Q09326 | Alpha-1,6-mannosyl-glycoprotein 2-beta-N-acetylglucosaminyltransferase |
| P62775 | Myotrophin                                                             |
| Q6P6Q2 | Keratin, type II cytoskeletal 5                                        |
| D3ZNQ6 | NEDD8-conjugating enzyme Ubc12                                         |
| Q3B8Q2 | Eukaryotic initiation factor 4A-III                                    |
| Q9JLT0 | Myosin heavy chain 10                                                  |
| Q9JM53 | Apoptosis-inducing factor 1                                            |
| P42667 | SEC11 homolog A                                                        |
| G3V8F5 | Mitochondrial import receptor subunit TOM40 homolog                    |
| Q5RKH6 | Protein OS-9                                                           |
| P13383 | Nucleolin                                                              |
| P13386 | High affinity immunoglobulin epsilon receptor subunit beta             |
| Q66X93 | Staphylococcal nuclease domain-containing protein 1                    |
| P62986 | Ubiquitin-60S ribosomal protein L40                                    |
| Q6RUV5 | Ras-related C3 botulinum toxin substrate 1 (Rac1)                      |
| P62982 | Ubiquitin-40S ribosomal protein S27a                                   |
| P82471 | Guanine nucleotide-binding protein G(q) subunit alpha                  |
| Q9EPH8 | Polyadenylate-binding protein 1                                        |
| P19944 | 60S acidic ribosomal protein P1                                        |
| P19945 | 60S acidic ribosomal protein P0                                        |
| P11240 | Cytochrome c oxidase subunit 5A mitochondrial                          |
| P11232 | Thioredoxin                                                            |
| P10252 | CD48 antigen                                                           |
| Q3KRE0 | ATPase family AAA domain-containing protein 3                          |
| P62329 | Thymosin beta-4                                                        |
| Q3KRE8 | Tubulin beta-2B                                                        |
| P10860 | Glutamate dehydrogenase 1                                              |
| D3ZGV2 | Peroxisomal membrane protein PEX16                                     |
| B2GUV5 | V-type proton ATPase subunit G 1                                       |
| B2GV71 | NADH dehydrogenase [ubiquinone] 1 alpha subcomplex assembly factor 5   |
| B2GV72 | Carbonyl reductase 3                                                   |
| P18418 | Calreticulin                                                           |
| Q6AYA5 | Transmembrane protein 106 B                                            |
| A7E3N2 | Neutrophil cytosol factor 2                                            |
| Q3KRD8 | Eukaryotic translation initiation factor 6                             |
| F1LVC3 | Ras-related protein Rab-6b                                             |



|        |                                                             |
|--------|-------------------------------------------------------------|
| G3V8C4 | Chloride intracellular channel protein 4                    |
| Q497A2 | Solute carrier family 35 member B2                          |
| P50137 | Transketolase                                               |
| P09527 | Ras-related protein Rab-7a                                  |
| P29419 | ATP synthase subunit E mitochondrial                        |
| P10888 | Cytochrome c oxidase subunit 4 isoform 1 mitochondrial      |
| Q66HG5 | Transmembrane 9 superfamily member 2                        |
| Q5U3Z7 | Serine hydroxymethyltransferase                             |
| Q63524 | Transmembrane emp24 domain-containing protein 2             |
| Q66HG9 | Mitochondrial antiviral-signaling protein                   |
| P62747 | Rho-related GTP-binding protein RhoB                        |
| B2GV92 | Prostaglandin E synthase 3                                  |
| Q4AEF8 | Coatomer subunit gamma 1                                    |
| B2GUX5 | 5'-nucleotidase                                             |
| P62083 | 40S ribosomal protein S7                                    |
| P20171 | GTPase HRas                                                 |
| B2GV96 | Coiled-coil domain containing 115                           |
| Q66HF2 | Transmembrane 9 superfamily member 1                        |
| Q66HF1 | NADH-ubiquinone oxidoreductase 75 kDa subunit mitochondrial |
| Q5BQE6 | Delta(24)-sterol reductase                                  |
| G3V8A5 | Vacuolar protein sorting-associated protein 35              |
| Q5U1Y2 | Ras-related C3 botulinum toxin substrate 2 (Rac2)           |
| P85007 | Immediate early response 3-interacting protein 1            |
| Q5EB77 | Ras-related protein Rab-18                                  |
| D3ZIP8 | Endonuclease domain containing 1                            |
| D4ADS9 | EFR3 homolog A                                              |
| B2GVB9 | Fermt3 protein                                              |
| F1M391 | Stimulator of interferon genes protein                      |
| P35355 | Prostaglandin G/H synthase 2                                |
| Q5U1X1 | Oligoribonuclease mitochondrial                             |
| Q6AXT5 | Ras-related protein Rab-21                                  |
| D3ZJ32 | Extended synaptotagmin 2                                    |
| D4A376 | Ras-related protein Rab-12                                  |
| P19511 | ATP synthase F(0) complex subunit B1 mitochondrial          |
| D3ZPR0 | Exportin-2                                                  |
| Q76GL9 | Neutral amino acid transporter A                            |
| F1LNF0 | Myosin heavy chain 14                                       |
| Q4KM73 | UMP-CMP kinase                                              |
| Q4KM74 | Vesicle-trafficking protein SEC22b                          |
| P46462 | Transitional endoplasmic reticulum ATPase                   |
| P35171 | Cytochrome c oxidase subunit 7A2                            |
| P04961 | Proliferating cell nuclear antigen                          |
| D3ZD11 | Signal peptidase complex subunit 2                          |
| Q3KRC3 | Signal recognition particle receptor alpha                  |

|        |                                                                   |
|--------|-------------------------------------------------------------------|
| Q6AXS5 | Plasminogen activator inhibitor 1 RNA-binding protein             |
| Q6AXS4 | Renin receptor                                                    |
| D4A4T0 | STIP1 homology and U box-containing protein 1                     |
| D4A0E2 | NSF attachment protein gamma                                      |
| P16617 | Phosphoglycerate kinase 1                                         |
| P45592 | Cofilin-1                                                         |
| D3ZF12 | Signal peptidase complex subunit 3                                |
| F1MAS0 | keratin 32                                                        |
| P05369 | Farnesyl pyrophosphate synthase                                   |
| Q5FVQ4 | Malectin                                                          |
| D3ZD09 | Cytochrome c oxidase subunit 6B1                                  |
| O35142 | Coatomer subunit beta 2                                           |
| D3ZF11 | Ragulator complex protein LAMTOR5                                 |
| P08753 | Guanine nucleotide-binding protein G(k) subunit alpha             |
| D3ZPP2 | ADP-ribosylation factor-like protein 8A                           |
| O35152 | BET1-like protein                                                 |
| D4A0G7 | Ras-related protein Rab-37                                        |
| D4A9L2 | Serine/arginine-rich splicing factor 1                            |
| P35427 | 60S ribosomal protein L13a                                        |
| Q5RKI8 | ATP-binding cassette sub-family B member 8                        |
| F1LPK9 | Phosphatidylinositol glycan anchor biosynthesis class U protein   |
| P08461 | Pyruvate dehydrogenase component E2                               |
| D4ABI7 | Very-long-chain (3R)-3-hydroxyacyl-CoA dehydratase                |
| Q66HR2 | Microtubule-associated protein RP/EB family member 1              |
| F1LNC4 | Vesicle transport through interaction with t-SNAREs homolog 1B    |
| Q9Z2Z8 | 7-dehydrocholesterol reductase                                    |
| G3V6D3 | ATP synthase subunit beta                                         |
| Q6AXX5 | Retinol dehydrogenase 11                                          |
| P35435 | ATP synthase subunit gamma mitochondrial                          |
| D3ZGM7 | Peptidase inhibitor 16                                            |
| Q5RKJ9 | Ras-related protein Rab-10                                        |
| G3V6E1 | Myosin heavy chain 2                                              |
| Q5FVL2 | ER membrane protein complex subunit 8                             |
| Q07647 | Solute carrier family 2, facilitated glucose transporter member 3 |
| Q499R8 | Heterogeneous nuclear ribonucleoprotein H                         |
| O70601 | Linker for activation of T-cells family member 1 (LAT)            |
| P14659 | Heat shock-related 70 kDa protein 2                               |
| P00507 | Aspartate aminotransferase mitochondrial                          |
| P84100 | 60S ribosomal protein L19                                         |
| Q3MHS9 | Chaperonin-containing TCP1 subunit 6A                             |
| M0RC99 | Ras-related protein Rab-5a                                        |
| P84817 | Mitochondrial fission 1 protein                                   |
| Q9JK11 | Reticulon-4                                                       |
| P23711 | Heme oxygenase 2                                                  |

|        |                                                              |
|--------|--------------------------------------------------------------|
| Q6AXV4 | Sorting and assembly machinery component 50 homolog          |
| P14668 | Annexin A5                                                   |
| Q5U1Z9 | Metaxin 2                                                    |
| Q9Z1E1 | Flotillin-1                                                  |
| Q4G075 | Leukocyte elastase inhibitor                                 |
| Q5FVN0 | Lysophospholipid acyltransferase 5                           |
| P24368 | Peptidyl-prolyl cis-trans isomerase B                        |
| P19234 | NADH dehydrogenase [ubiquinone] flavoprotein 2 mitochondrial |
| Q499P3 | C1GALT1-specific chaperone 1                                 |
| P23514 | Coatomer subunit beta 1                                      |
| Q99JC6 | Tapasin                                                      |

| ID Term            | GO Term                   | Fold Enriched | Count                                                         | <i>p</i> -value | FDR    |
|--------------------|---------------------------|---------------|---------------------------------------------------------------|-----------------|--------|
| GO:0007010         | CYTOSKELETON ORGANIZATION | 1.63          | 93                                                            | 2.94E-6         | 5.7E-3 |
| Annotated proteins |                           |               |                                                               |                 |        |
| Protein Accession  |                           |               | Protein Identification                                        |                 |        |
| P63322             |                           |               | Ras-related protein Ral-A                                     |                 |        |
| Q5U1Y2             |                           |               | Ras-related C3 botulinum toxin substrate 2 (Rac2)             |                 |        |
| Q62839             |                           |               | Golgin subfamily A member 2                                   |                 |        |
| Q505J9             |                           |               | ATPase family AAA domain-containing protein 1                 |                 |        |
| B2RZ27             |                           |               | SH3 domain-binding glutamic acid-rich-like protein 3          |                 |        |
| Q3T1K5             |                           |               | F-actin-capping protein subunit alpha-2                       |                 |        |
| Q00238             |                           |               | Intercellular adhesion molecule 1 (ICAM1)                     |                 |        |
| P68370             |                           |               | Tubulin alpha-1A                                              |                 |        |
| Q05030             |                           |               | Platelet-derived growth factor receptor beta                  |                 |        |
| G3V852             |                           |               | Talin-1                                                       |                 |        |
| D4ABM3             |                           |               | Dishevelled associated activator of morphogenesis 1           |                 |        |
| P13084             |                           |               | Nucleophosmin                                                 |                 |        |
| P62329             |                           |               | Thymosin beta-4                                               |                 |        |
| P69897             |                           |               | Tubulin beta-5                                                |                 |        |
| D4A7U1             |                           |               | Zyxin                                                         |                 |        |
| Q66HR2             |                           |               | Microtubule-associated protein RP/EB family member 1          |                 |        |
| P62828             |                           |               | GTP-binding nuclear protein Ran                               |                 |        |
| P47819             |                           |               | Glial fibrillary acidic protein                               |                 |        |
| Q3KRE8             |                           |               | Tubulin beta-2B                                               |                 |        |
| P49134             |                           |               | Integrin beta 1                                               |                 |        |
| P85108             |                           |               | Tubulin beta-2A                                               |                 |        |
| P09456             |                           |               | cAMP-dependent protein kinase type I-alpha regulatory subunit |                 |        |
| Q91ZN1             |                           |               | Coronin-1A                                                    |                 |        |
| Q6IG02             |                           |               | Keratin, type II cytoskeletal 2 epidermal                     |                 |        |
| P52296             |                           |               | Importin subunit beta-1                                       |                 |        |
| D3ZTJ0             |                           |               | Protein XRP2                                                  |                 |        |

|        |                                                                                   |
|--------|-----------------------------------------------------------------------------------|
| Q4QRB4 | Tubulin beta-3                                                                    |
| P07632 | Superoxide dismutase [Cu-Zn]                                                      |
| Q6IG00 | Keratin, type II cytoskeletal 4                                                   |
| Q3SWT0 | Platelet endothelial cell adhesion molecule (Pecam1)                              |
| Q63116 | Mast/stem cell growth factor receptor                                             |
| Q08163 | Adenylyl cyclase-associated protein 1                                             |
| Q6P9V9 | Tubulin alpha-1B                                                                  |
| F7EWC1 | Vasodilator-stimulated phosphoprotein                                             |
| Q6AY56 | Tubulin alpha-8                                                                   |
| Q6IFW6 | Keratin, type I cytoskeletal 10                                                   |
| Q5XIF6 | Tubulin alpha-4A                                                                  |
| P18418 | Calreticulin                                                                      |
| P09495 | Tropomyosin alpha-4                                                               |
| P31000 | Vimentin                                                                          |
| P62963 | Profilin-1                                                                        |
| Q4QQV0 | Tubulin beta-6                                                                    |
| P61589 | Transforming protein RhoA                                                         |
| P20417 | Protein-tyrosine phosphatase 1B                                                   |
| F1LNF0 | Myosin heavy chain 14                                                             |
| G3V6E1 | Myosin heavy chain 2                                                              |
| Q66HD0 | Endoplasmin                                                                       |
| G3V6P7 | Myosin heavy chain 9                                                              |
| P08644 | GTPase KRas                                                                       |
| Q5BJY9 | Keratin, type I cytoskeletal 18                                                   |
| Q5M860 | Rho GDP dissociation inhibitor 2                                                  |
| Q32PX6 | Rho-related GTP-binding protein RhoG                                              |
| P04797 | Glyceraldehyde-3-phosphate dehydrogenase                                          |
| D3ZAY7 | Band 4.1-like protein 2                                                           |
| F1LRV9 | Myosin heavy chain 1                                                              |
| Q8CFN2 | Cell division control protein 42 homolog (CDC42)                                  |
| P62775 | Myotrophin                                                                        |
| P45592 | Cofilin-1                                                                         |
| Q6S395 | Plectin                                                                           |
| Q78P65 | Rap2A-like protein                                                                |
| Q68FX4 | Hematopoietic cell-specific LYN substrate 1 (hcls1)                               |
| P01830 | Thy-1 membrane glycoprotein                                                       |
| P62909 | 40S ribosomal protein S3                                                          |
| M0RCF3 | Integrin beta 3                                                                   |
| Q68FP1 | Gelsolin                                                                          |
| Q4V8C2 | Centromere/kinetochore protein zw10 homolog                                       |
| Q9JJ19 | Na(+)/H(+) exchange regulatory cofactor NHE-RF1                                   |
| Q6AYC4 | Macrophage-capping protein                                                        |
| Q5XI34 | Serine/threonine-protein phosphatase 2A 65 kDa regulatory subunit A alpha isoform |
| Q5XI32 | F-actin-capping protein subunit beta                                              |

|        |                                                   |
|--------|---------------------------------------------------|
| Q9JLT0 | Myosin heavy chain 10                             |
| Q6AYZ1 | Tubulin alpha-1C                                  |
| Q9JKB7 | Guanine deaminase                                 |
| P20171 | GTPase HRas                                       |
| P31977 | Ezrin                                             |
| M0RDJ4 | Glia maturation factor beta                       |
| Q5XI38 | Lymphocyte cytosolic protein 1                    |
| Q6IFU9 | keratin 16                                        |
| Q6P9T8 | Tubulin beta-4B                                   |
| Q5XI73 | Rho GDP dissociation inhibitor 1                  |
| Q6IFU8 | Keratin, type I cytoskeletal 17                   |
| Q63610 | Tropomyosin alpha-3                               |
| P07150 | Annexin A1                                        |
| Q4KM97 | Tyrosine-protein kinase BLK                       |
| Q10758 | Keratin, type II cytoskeletal 8                   |
| Q6IFV3 | Keratin, type I cytoskeletal 15                   |
| G3V908 | keratin, type II Kb15                             |
| P53987 | Monocarboxylate transporter 1                     |
| Q6IFV1 | Keratin, type I cytoskeletal 14                   |
| Q6IFZ5 | Keratin, type II cytoskeletal 2 oral              |
| Q6RUV5 | Ras-related C3 botulinum toxin substrate 1 (Rac1) |
| E9PT65 | Radixin                                           |
| B4F7C2 | Tubulin beta-4A                                   |

| ID Term            | GO Term             | Fold Enriched | Count                                             | p -value | FDR     |
|--------------------|---------------------|---------------|---------------------------------------------------|----------|---------|
| GO:0022610         | BIOLOGICAL ADHESION | 1.63          | 122                                               | 7.33E-8  | 1.43E-4 |
| Annotated proteins |                     |               |                                                   |          |         |
| Protein Accession  |                     |               | Protein Identification                            |          |         |
| M0RD75             |                     |               | 40S ribosomal protein S6                          |          |         |
| Q68FR6             |                     |               | Elongation factor 1-gamma                         |          |         |
| Q5U1Y2             |                     |               | Ras-related C3 botulinum toxin substrate 2 (Rac2) |          |         |
| F1M2P8             |                     |               | Protein kinase C alpha                            |          |         |
| Q6IN24             |                     |               | Galectin-8                                        |          |         |
| G3V8I4             |                     |               | Syntaxin-4A                                       |          |         |
| Q00238             |                     |               | Intercellular adhesion molecule 1 (ICAM1)         |          |         |
| G3V852             |                     |               | Talin-1                                           |          |         |
| D4A7U1             |                     |               | Zyxin                                             |          |         |
| G3V679             |                     |               | Transferrin receptor protein 1                    |          |         |
| Q6PCU4             |                     |               | Emerin                                            |          |         |
| B2GVB9             |                     |               | Fermt3 protein                                    |          |         |
| Q4FZT0             |                     |               | Stomatin-like protein 2                           |          |         |
| P49134             |                     |               | Integrin beta 1                                   |          |         |

|        |                                                                     |
|--------|---------------------------------------------------------------------|
| P97546 | Neuroplastin                                                        |
| P62260 | 14-3-3 protein epsilon                                              |
| Q641Y0 | Oligosaccharyl transferase 48 kDa subunit                           |
| Q5XI52 | Vezatin                                                             |
| Q62733 | Lamina-associated polypeptide 2 isoform beta                        |
| Q3SWT0 | Platelet endothelial cell adhesion molecule (Pecam1)                |
| Q6NYB7 | Ras-related protein Rab-1a                                          |
| D3ZJ32 | Extended synaptotagmin 2                                            |
| D3ZWS0 | Protein scribble homolog                                            |
| P62963 | Profilin-1                                                          |
| P61589 | Transforming protein RhoA                                           |
| P20417 | Protein-tyrosine phosphatase 1B                                     |
| G3V7M2 | Integrin beta 7                                                     |
| Q9Z269 | VAMP-associated protein B                                           |
| G3V6P7 | Myosin heavy chain 9                                                |
| P20411 | High affinity immunoglobulin epsilon receptor subunit gamma         |
| Q91Y81 | Septin-2                                                            |
| Q5BJY9 | Keratin, type I cytoskeletal 18                                     |
| P35704 | Peroxiredoxin-2                                                     |
| P11762 | Galectin-1                                                          |
| Q6AXS5 | Plasminogen activator inhibitor 1 RNA-binding protein               |
| D4ADE8 | ATP-dependent RNA helicase DDX3X                                    |
| P06761 | Endoplasmic reticulum chaperone BiP                                 |
| Q9QYV0 | Disintegrin and metalloproteinase domain-containing protein 15      |
| P63102 | 14-3-3 protein zeta/delta                                           |
| Q01621 | Tyrosine-protein kinase LCK                                         |
| F1LZX9 | Integrin alpha 5                                                    |
| P61227 | Ras-related protein Rap-2b                                          |
| O35796 | Complement component 1 Q subcomponent-binding protein mitochondrial |
| M0RCF3 | Integrin beta 3                                                     |
| Q6AYC4 | Macrophage-capping protein                                          |
| Q1WIM3 | Cell adhesion molecule 3                                            |
| P97887 | Presenilin-1                                                        |
| Q9JLT0 | Myosin heavy chain 10                                               |
| D3ZWZ1 | Integrin alpha X                                                    |
| B2RYF6 | Cleft lip and palate associated transmembrane protein 1             |
| Q5XI38 | Lymphocyte cytosolic protein 1                                      |
| Q5XFX0 | Transgelin-2                                                        |
| G3V667 | Integrin alpha 6                                                    |
| Q66X93 | Staphylococcal nuclease domain-containing protein 1                 |
| D4AAL4 | Adhesion G protein-coupled receptor L3                              |
| Q6RUV5 | Ras-related C3 botulinum toxin substrate 1 (Rac1)                   |
| Q07936 | Annexin A2                                                          |
| P05197 | Elongation factor 2                                                 |

|        |                                                               |
|--------|---------------------------------------------------------------|
| E9PT65 | Radixin                                                       |
| Q6MG61 | Chloride intracellular channel protein 1                      |
| O88767 | Protein/nucleic acid deglycase DJ-1                           |
| G3V8L7 | Integrin alpha M                                              |
| P10252 | CD48 antigen                                                  |
| P04642 | L-lactate dehydrogenase A chain                               |
| P35213 | 14-3-3 protein beta/alpha                                     |
| O35509 | Ras-related protein Rab-11b                                   |
| Q66HR2 | Microtubule-associated protein RP/EB family member 1          |
| P34058 | Heat shock protein HSP 90-beta                                |
| Q9QYE7 | Integrin alpha D                                              |
| G3V6D3 | ATP synthase subunit beta                                     |
| O08775 | Vascular endothelial growth factor receptor 2                 |
| Q920P6 | Adenosine deaminase                                           |
| P09456 | cAMP-dependent protein kinase type I-alpha regulatory subunit |
| Q91ZN1 | Coronin-1A                                                    |
| P63095 | Guanine nucleotide-binding protein G(s) subunit alpha         |
| G3V7Q7 | Ras GTPase-activating-like protein IQGAP1                     |
| Q63116 | Mast/stem cell growth factor receptor                         |
| P26453 | Basigin                                                       |
| F7EWC1 | Vasodilator-stimulated phosphoprotein                         |
| Q5RKJ9 | Ras-related protein Rab-10                                    |
| P18418 | Calreticulin                                                  |
| G3V964 | Neurotrimin                                                   |
| O88777 | Presenilin-2                                                  |
| P38983 | 40S ribosomal protein SA                                      |
| Q63198 | Contactin 1                                                   |
| P11980 | Pyruvate kinase PKM                                           |
| P63039 | 60 kDa heat shock protein                                     |
| Q8CGU6 | Nicastrin                                                     |
| O70601 | Linker for activation of T-cells family member 1 (LAT)        |
| P10719 | ATP synthase subunit beta mitochondrial                       |
| O35567 | Bifunctional purine biosynthesis protein PURH                 |
| Q0R3W9 | GTPase, IMAP family member 1                                  |
| Q08849 | Syntaxin-3                                                    |
| Q8CFN2 | Cell division control protein 42 homolog (CDC42)              |
| F6T9E7 | P-selectin glycoprotein ligand 1                              |
| Q5I0D1 | Glyoxalase domain-containing protein 4                        |
| Q6S395 | Plectin                                                       |
| Q08851 | Syntaxin-5                                                    |
| Q9JK11 | Reticulon-4                                                   |
| P01830 | Thy-1 membrane glycoprotein                                   |
| Q68FP1 | Gelsolin                                                      |
| P23640 | Ras-related protein Rab-27a                                   |

|        |                                                                     |
|--------|---------------------------------------------------------------------|
| Q91ZQ0 | Vacuole membrane protein 1                                          |
| Q07014 | Tyrosine-protein kinase Lyn                                         |
| P62747 | Rho-related GTP-binding protein RhoB                                |
| M0RAU0 | Advanced glycosylation end product-specific receptor                |
| P31977 | Ezrin                                                               |
| Q63085 | Cyclic GMP-inhibited phosphodiesterase B                            |
| Q9Z1E1 | Flotillin-1                                                         |
| P63025 | VAMP3                                                               |
| Q63081 | Protein disulfide-isomerase A6                                      |
| P07151 | Beta-2-microglobulin                                                |
| P13832 | Myosin regulatory light chain RLC-A                                 |
| P04157 | Receptor-type tyrosine-protein phosphatase C (CD45)                 |
| P07150 | Annexin A1                                                          |
| Q62940 | E3 ubiquitin-protein ligase NEDD4                                   |
| Q62658 | Peptidyl-prolyl cis-trans isomerase FKBP1A                          |
| P60711 | Actin cytoplasmic 1                                                 |
| B2RYB8 | Integrin beta 2                                                     |
| Q63803 | Guanine nucleotide-binding protein G(s) subunit alpha isoforms XLas |
| Q9Z2S9 | Flotillin-2                                                         |
| P13838 | Leukosialin                                                         |
| F1LVV4 | Protein RCC2                                                        |
