# Supplementary material for: Proteomic Analysis of Lipid Rafts from RBL-2H3 Mast Cells
Source: MDPI journal article supplement (doi:10.3390/ijms20163904), 2019-08-11
Supplement: s1 [file s1]

Supplementary Table 2. Detailed annotation of proteins identified in Method II

| Protein ID | Protein accession | Protein description                                            | Gene name | MW [kDa] | Score AVG | Peptides AVG |
|------------|-------------------|----------------------------------------------------------------|-----------|----------|-----------|--------------|
| 1433B_RAT  | P35213            | 14-3-3 protein beta/alpha                                      | Ywhab     | 28.05    | 1578.545  | 8            |
| 1433E_RAT  | P62260            | 14-3-3 protein epsilon                                         | Ywhae     | 29.17    | 4654.923  | 10           |
| 1433F_RAT  | P68511            | 14-3-3 protein eta                                             | Ywhah     | 28.21    | 2128.056  | 9            |
| 1433G_RAT  | P61983            | 14-3-3 protein gamma                                           | Ywhag     | 28.30    | 4878.047  | 11           |
| 1433T_RAT  | P68255            | 14-3-3 protein theta                                           | Ywhaq     | 27.78    | 1600.605  | 8            |
| 1433Z_RAT  | P63102            | 14-3-3 protein zeta/delta                                      | Ywhaz     | 27.77    | 17064.52  | 11           |
| 4F2_RAT    | Q794F9            | 4F2 cell-surface antigen heavy chain                           | Slc3a2    | 58.07    | 25879.06  | 20           |
| A0JN29_RAT | A0JN29            | Lunapark ER junction formation factor                          | Lnpk      | 42.17    | 5453.1016 | 12           |
| A0JN30_RAT | A0JN30            | Canopy 2 homolog                                               | Cnpy2     | 20.71    | 1589.0969 | 4            |
| A1L1J8_RAT | A1L1J8            | Ras-related protein Rab-5b                                     | Rab5b     | 23.68    | 11794.084 | 8            |
| A1L1L6_RAT | A1L1L6            | Mitochondrial Rho GTPase 1                                     | Rhot1     | 72.16    | 571.15546 | 10           |
| A3RLA8_RAT | A3RLA8            | Low affinity immunoglobulin gamma Fc region receptor II        | Fcgr2b    | 37.97    | 6999.2134 | 9            |
| AATM_RAT   | P00507            | Aspartate aminotransferase mitochondrial                       | Got2      | 47.31    | 1015.1728 | 11           |
| ABCB6_RAT  | O70595            | ATP-binding cassette sub-family B member 6                     | Abcb6     | 93.31    | 5574.2964 | 13           |
| ABCB8_RAT  | Q5RKI8            | ATP-binding cassette sub-family B member 8                     | Abcb8     | 77.77    | 1087.13   | 13           |
| ABHGA_RAT  | Q6MG55            | Abhydrolase domain containing 16A                              | Abhd16a   | 63.04    | 529.3098  | 12           |
| ACSL3_RAT  | Q63151            | Long chain fatty acid CoA ligase 3                             | Acsl3     | 80.46    | 318.20175 | 13           |
| ACSL5_RAT  | O88813            | Long chain fatty acid CoA ligase 5                             | Acsl5     | 76.41    | 1395.4258 | 17           |
| ACTB_RAT   | P60711            | Actin cytoplasmic 1                                            | Actb      | 41.74    | 34703.336 | 21           |
| ADA15_RAT  | Q9QYV0            | Disintegrin and metalloproteinase domain-containing protein 15 | Adam15    | 93.31    | 474.3245  | 9            |
| ADT1_RAT   | Q05962            | ADP/ATP translocase 1                                          | Slc25a4   | 32.99    | 14974.186 | 13           |
| ADT2_RAT   | Q09073            | ADP/ATP translocase 2                                          | Slc25a5   | 32.90    | 25205.96  | 22           |
| AIFM1_RAT  | Q9J M53           | Apoptosis-inducing factor 1                                    | Aifm1     | 66.72    | 561.40063 | 11           |
| AKAP1_RAT  | O88884            | A-kinase anchor protein 1, mitochondrial                       | Akap1     | 91.75    | 2523.194  | 13           |
| AL5AP_RAT  | P20291            | Arachidonate 5-lipoxygenase-activating protein                 | Alox5ap   | 18.07    | 15126.04  | 5            |
| ALDOA_RAT  | P05065            | Fructose-bisphosphate aldolase A                               | Aldoa     | 39.35    | 889.46655 | 7            |
| ANXA1_RAT  | P07150            | Annexin A1                                                     | Anxa1     | 38.83    | 850.72046 | 10           |
| APAF_RAT   | Q9EPV5            | Apoptotic protease-activating factor 1                         | Apaf1     | 141.15   | 424.95    | 9            |
| ARL8B_RAT  | Q66HA6            | ADP-ribosylation factor-like protein 8B                        | Arl8b     | 21.54    | 4317.4966 | 10           |
| ARM10_RAT  | B1WBW4            | Armadillo repeat-containing protein 10                         | Armc10    | 33.42    | 6899.171  | 9            |
| ARMX3_RAT  | Q5XID7            | Armadillo repeat-containing X-linked protein 3                 | Armxc3    | 42.55    | 1883.8921 | 9            |
| AT1A1_RAT  | P06685            | Sodium/potassium-transporting ATPase subunit alpha-1           | Atp1a1    | 113.05   | 18895.371 | 42           |
| AT1A4_RAT  | Q64541            | Sodium/potassium-transporting ATPase subunit alpha-4           | Atp1a4    | 114.01   | 3007.623  | 12           |

|            |        |                                                                   |          |        |           |    |
|------------|--------|-------------------------------------------------------------------|----------|--------|-----------|----|
| AT1B3_RAT  | Q63377 | Sodium/potassium-transporting ATPase subunit beta-3               | Atp1b3   | 31.83  | 13653.33  | 8  |
| AT2A1_RAT  | Q64578 | Sarcoplasmic/endoplasmic reticulum calcium ATPase 1 (SERCA1)      | Atp2a1   | 109.41 | 7037.0156 | 18 |
| AT5F1_RAT  | P19511 | ATP synthase F(0) complex subunit B1 mitochondrial                | Atp5pb   | 28.87  | 6731.9316 | 11 |
| ATAD1_RAT  | Q505J9 | ATPase family AAA domain-containing protein 1                     | Atad1    | 40.72  | 3386.4302 | 10 |
| ATAD3_RAT  | Q3KRE0 | ATPase family AAA domain-containing protein 3                     | Atad3    | 66.76  | 3541.2605 | 21 |
| ATP4A_RAT  | P09626 | Potassium-transporting ATPase alpha chain 1                       | Atp4a    | 114.04 | 1110.19   | 12 |
| ATP5H_RAT  | P31399 | ATP synthase subunit D mitochondrial                              | Atp5pd   | 18.76  | 12645.211 | 7  |
| ATP5I_RAT  | P29419 | ATP synthase subunit E mitochondrial                              | Atp5me   | 8.26   | 26547.965 | 5  |
| ATP5J_RAT  | P21571 | ATP synthase-coupling factor 6 mitochondrial                      | Atp5pf   | 12.49  | 18856.01  | 5  |
| ATPA_RAT   | P15999 | ATP synthase subunit alpha mitochondrial                          | Atp5f1a  | 59.75  | 48943.023 | 29 |
| ATPG_RAT   | P35435 | ATP synthase subunit gamma mitochondrial                          | Atp5f1c  | 30.19  | 9105.262  | 11 |
| ATPK_RAT   | D3ZAF6 | ATP synthase subunit F mitochondrial                              | Atp5mf   | 10.45  | 4065.0117 | 2  |
| ATPO_RAT   | Q06647 | ATP synthase subunit O mitochondrial                              | Atp5po   | 23.40  | 20299.375 | 12 |
| ATRAP_RAT  | Q642A2 | Type-1 angiotensin II receptor-associated protein                 | Agtrap   | 17.40  | 5631.5186 | 2  |
| AUP1_RAT   | A1L134 | Ancient ubiquitous protein 1                                      | Aup1     | 46.20  | 1158.9775 | 8  |
| B0BN02_RAT | B0BN02 | Metaxin 1                                                         | Mtx1     | 48.44  | 1487.6011 | 7  |
| B0BN30_RAT | B0BN30 | Mitochondrial carrier homolog 1                                   | Mtch1    | 41.59  | 987.7393  | 6  |
| B0BN52_RAT | B0BN52 | Mitochondrial carrier homolog 2                                   | Mtch2    | 33.53  | 5936.334  | 8  |
| B0BN81_RAT | B0BN81 | Ribosomal protein S5                                              | Rps5     | 22.91  | 5174.41   | 5  |
| B0BNG3_RAT | B0BNG3 | Vesicular integral-membrane protein VIP36                         | Lman2    | 40.39  | 24611.645 | 18 |
| B0BNK1_RAT | B0BNK1 | Ras-related protein Rab-5c                                        | Rab5c    | 23.43  | 19618.02  | 9  |
| B1WBY5_RAT | B1WBY5 | DnaJ homolog subfamily C member 11                                | Dnajc11  | 63.21  | 1092.5051 | 14 |
| B1WBY7_RAT | B1WBY7 | Erlin-1                                                           | Erlin1   | 39.27  | 4103.746  | 9  |
| B1WC50_RAT | B1WC50 | RNA-binding protein EWS-like                                      | Ewsr1    | 68.33  | 1089.7468 | 9  |
| B1WC61_RAT | B1WC61 | Acyl-CoA dehydrogenase family member 9                            | Acad9    | 68.84  | 698.94855 | 13 |
| B1WC67_RAT | B1WC67 | Solute carrier family 25 member 24                                | Slc25a24 | 52.89  | 859.5758  | 10 |
| B2GUV5_RAT | B2GUV5 | V-type proton ATPase subunit G 1                                  | Atp6v1g1 | 13.71  | 1920.5234 | 4  |
| B2GUX5_RAT | B2GUX5 | 5'-nucleotidase                                                   | Nt5c3a   | 33.81  | 4055.9336 | 12 |
| B2GUZ9_RAT | B2GUZ9 | Fam49b protein                                                    | Fam49b   | 36.78  | 1878.8369 | 7  |
| B2GV96_RAT | B2GV96 | Coiled-coil domain containing 115                                 | Ccdc115  | 19.82  | 2758.0981 | 7  |
| B2MG_RAT   | P07151 | Beta-2-microglobulin                                              | B2m      | 13.72  | 3851.3464 | 3  |
| B2RYC9_RAT | B2RYC9 | Glucosylceramidase                                                | Gba      | 57.49  | 2284.374  | 13 |
| B2RYD7_RAT | B2RYD7 | STT3B, catalytic subunit of the oligosaccharyltransferase complex | Stt3b    | 93.44  | 1266.1827 | 12 |
| B2RYF6_RAT | B2RYF6 | Cleft lip and palate associated transmembrane protein 1           | Clptm1   | 75.28  | 3689.6953 | 13 |
| B2RYQ2_RAT | B2RYQ2 | Serine/threonine-protein phosphatase 2A activator                 | Ptpa     | 36.62  | 738.1688  | 6  |
| B2RZB3_RAT | B2RZB3 | Eva-1 homolog B                                                   | Eva1b    | 24.58  | 966.3343  | 4  |
| B2RZD1_RAT | B2RZD1 | Protein transport protein Sec61 subunit beta                      | Sec61b   | 9.99   | 28681.2   | 3  |
| B3A2_RAT   | P23347 | Anion exchange protein 2                                          | Slc4a2   | 136.64 | 721.1465  | 20 |

|            |        |                                                                     |           |        |           |    |
|------------|--------|---------------------------------------------------------------------|-----------|--------|-----------|----|
| B4F7C2_RAT | B4F7C2 | Tubulin beta-4A                                                     | Tubb4a    | 49.59  | 2889.181  | 16 |
| B4F7C9_RAT | B4F7C9 | STT3A, catalytic subunit of the oligosaccharyltransferase complex   | Stt3a     | 80.60  | 5105.618  | 19 |
| B4GN1_RAT  | Q10468 | Beta-1,4 N-acetylgalactosaminyltransferase 1                        | B4galnt1  | 59.28  | 1427.76   | 12 |
| B5DEL8_RAT | B5DEL8 | NADH dehydrogenase (Ubiquinone) iron-sulfur protein 5               | Ndufs5    | 12.70  | 652.6625  | 2  |
| B5DEZ3_RAT | B5DEZ3 | Coiled-coil domain containing 126                                   | Ccdc126   | 15.53  | 4296.792  | 3  |
| B5DFJ2_RAT | B5DFJ2 | Protein FAM3A                                                       | Fam3a     | 25.15  | 1369.282  | 7  |
| B6RK61_RAT | B6RK61 | Myosin heavy chain 7B                                               | Myh7b     | 221.63 | 18.7633   | 1  |
| BAF_RAT    | Q9R1T1 | Barrier-to-autointegration factor                                   | Banf1     | 10.05  | 2330.153  | 4  |
| BASI_RAT   | P26453 | Basigin                                                             | Bsg       | 42.44  | 11856.585 | 8  |
| BASP1_RAT  | Q05175 | Brain acid soluble protein 1                                        | Basp1     | 21.79  | 41388.22  | 9  |
| BET1_RAT   | Q62896 | Bet1 golgi vesicular membrane trafficking protein                   | Bet1      | 13.23  | 8325.793  | 2  |
| BET1L_RAT  | O35152 | BET1-like protein                                                   | Bet1l     | 12.42  | 1466.276  | 2  |
| C1GLC_RAT  | Q499P3 | C1GALT1-specific chaperone 1                                        | C1galt1c1 | 36.04  | 1047.14   | 5  |
| C1GLT_RAT  | Q9JJ05 | Glycoprotein-N-acetylgalactosamine 3-beta-galactosyltransferase 1   | C1galt1   | 42.31  | 2600.0864 | 8  |
| C1QBP_RAT  | O35796 | Complement component 1 Q subcomponent-binding protein mitochondrial | C1qbp     | 31.00  | 17896.625 | 7  |
| CADM3_RAT  | Q1WIM3 | Cell adhesion molecule 3                                            | Cadm3     | 42.91  | 6705.5596 | 11 |
| CAH8_RAT   | Q5PPN4 | Carbonic anhydrase-related protein                                  | Ca8       | 32.96  | 631.64404 | 5  |
| CALR_RAT   | P18418 | Calreticulin                                                        | Calr      | 48.00  | 8945.08   | 11 |
| CALX_RAT   | P35565 | Calnexin                                                            | Canx      | 67.26  | 19625.45  | 23 |
| CBPA3_RAT  | P21961 | Mast cell carboxypeptidase A                                        | Cpa3      | 47.94  | 1407.913  | 10 |
| CCD47_RAT  | Q5U2X6 | Coiled-coil domain-containing protein 47                            | Ccdc47    | 55.73  | 10018.979 | 18 |
| CD38_RAT   | Q64244 | ADP-ribosyl cyclase/cyclic ADP-ribose hydrolase 1                   | Cd38      | 34.44  | 4465.1885 | 9  |
| CD48_RAT   | P10252 | CD48 antigen                                                        | Cd48      | 27.68  | 44269.734 | 14 |
| CDC42_RAT  | Q8CFN2 | Cell division control protein 42 homolog (CDC42)                    | Cdc42     | 21.26  | 26481.715 | 8  |
| CH10_RAT   | P26772 | 10 kDa heat shock protein mitochondrial                             | Hspe1     | 10.90  | 11615.26  | 5  |
| CH60_RAT   | P63039 | 60 kDa heat shock protein                                           | Hspd1     | 60.96  | 8192.467  | 24 |
| CHPT1_RAT  | Q66H21 | Cholinephosphotransferase 1                                         | Chpt1     | 44.60  | 1437.133  | 3  |
| CISD1_RAT  | B0K020 | CDGSH iron-sulfur domain-containing protein 1                       | Cisd1     | 12.10  | 39811.453 | 7  |
| CISY_RAT   | Q8VHF5 | Citrate synthase mitochondrial                                      | Cs        | 51.87  | 1031.1398 | 6  |
| CK5P3_RAT  | Q9JLH7 | CDK5 regulatory subunit-associated protein 3                        | Cdk5rap3  | 57.05  | 4572.61   | 16 |
| CL2DB_RAT  | Q0H8B9 | C-type lectin domain family 2 member D11                            | Clec2d11  | 23.54  | 3521.782  | 7  |
| CLCN5_RAT  | P51796 | Chloride intracellular channel protein 5                            | Clcn5     | 83.07  | 1283.8569 | 8  |
| CLH1_RAT   | P11442 | Clathrin heavy chain 1                                              | Cltc      | 191.60 | 613.12506 | 26 |
| CMA1_RAT   | P50339 | Chymase 1                                                           | Cma1      | 27.57  | 1508.505  | 3  |
| CNTN1_RAT  | Q63198 | Contactin 1                                                         | Cntn1     | 113.50 | 1301.9305 | 20 |
| COF1_RAT   | P45592 | Cofilin-1                                                           | Cfl1      | 18.53  | 2967.661  | 6  |
| COMT_RAT   | P22734 | Catechol O-methyltransferase                                        | Comt      | 29.60  | 1367.642  | 7  |
| COPB_RAT   | P23514 | Coatomer subunit beta 1                                             | Copb1     | 107.01 | 1067.6825 | 20 |

|            |        |                                                               |                      |        |           |    |
|------------|--------|---------------------------------------------------------------|----------------------|--------|-----------|----|
| COPB2_RAT  | O35142 | Coatomer subunit beta 2                                       | Copb2                | 102.55 | 1245.673  | 16 |
| COPD_RAT   | Q66H80 | Coatomer subunit delta                                        | Arcn1                | 57.20  | 564.4874  | 9  |
| COPG1_RAT  | Q4AEF8 | Coatomer subunit gamma 1                                      | Copg1                | 97.61  | 405.6862  | 16 |
| COX41_RAT  | P10888 | Cytochrome c oxidase subunit 4 isoform 1 mitochondrial        | Cox4i1               | 19.52  | 12578.01  | 11 |
| COX5A_RAT  | P11240 | Cytochrome c oxidase subunit 5A mitochondrial                 | Cox5a                | 16.13  | 17269.785 | 9  |
| COX5B_RAT  | P12075 | Cytochrome c oxidase subunit 5B mitochondrial                 | Cox5b                | 13.92  | 6169.5947 | 6  |
| CP20A_RAT  | Q6P7D4 | Cytochrome P450 20A1                                          | Cyp20a1              | 52.00  | 704.8057  | 7  |
| CP51A_RAT  | Q64654 | Lanosterol 14-alpha demethylase                               | Cyp51a1              | 56.71  | 2204.413  | 14 |
| CR1L_RAT   | Q63135 | Complement component receptor 1-like protein                  | Cr1l                 | 61.68  | 7281.857  | 19 |
| CX6C2_RAT  | P11951 | Cytochrome c oxidase subunit 6C2                              | Cox6c2               | 8.46   | 6444.0205 | 4  |
| CX7A2_RAT  | P35171 | Cytochrome c oxidase subunit 7A2                              | Cox7a2               | 9.35   | 2968.9531 | 3  |
| CYB5B_RAT  | P04166 | Cytochrome b5 type B                                          | Cyb5b                | 16.27  | 8170.613  | 5  |
| D3Z9L0_RAT | D3Z9L0 | Acylglycerol kinase                                           | Agk                  | 54.26  | 433.50516 | 8  |
| D3ZAS9_RAT | D3ZAS9 | DDRKG domain containing 1                                     | Ddrkg1               | 38.61  | 10160.611 | 6  |
| D3ZAY7_RAT | D3ZAY7 | Band 4.1-like protein 2                                       | Epb41l2              | 89.13  | 739.45105 | 17 |
| D3ZCZ9_RAT | D3ZCZ9 | NADH dehydrogenase [ubiquinone] iron-sulfur protein 6         | LOC100912599         | 13.04  | 885.649   | 3  |
| D3ZD09_RAT | D3ZD09 | Cytochrome c oxidase subunit 6B1                              | Cox6b1               | 10.07  | 13217.445 | 7  |
| D3ZD11_RAT | D3ZD11 | Signal peptidase complex subunit 2                            | Spcs2                | 24.97  | 11044.09  | 13 |
| D3ZD83_RAT | D3ZD83 | Major facilitator superfamily domain-containing protein 10    | Mfsd10               | 49.41  | 791.0322  | 5  |
| D3ZDR2_RAT | D3ZDR2 | Charged multivesicular body protein 6                         | Chmp6                | 23.29  | 1383.381  | 5  |
| D3ZF11_RAT | D3ZF11 | Ragulator complex protein LAMTOR5                             | Lamtor5              | 16.39  | 8052.9424 | 4  |
| D3ZF12_RAT | D3ZF12 | Signal peptidase complex subunit 3                            | Spcs3                | 20.33  | 6419.79   | 7  |
| D3ZF54_RAT | D3ZF54 | Anoctamin-10                                                  | Ano10                | 79.04  | 598.88275 | 10 |
| D3ZF97_RAT | D3ZF97 | Endoplasmic reticulum lectin 1                                | Erlec1               | 54.67  | 833.27783 | 10 |
| D3ZFK5_RAT | D3ZFK5 | Signal peptidase complex subunit 1                            | Spcs1                | 18.10  | 34303.133 | 4  |
| D3ZG43_RAT | D3ZG43 | NADH dehydrogenase (ubiquinone) iron-sulfur protein 3         | Ndufs3               | 30.23  | 3831.0947 | 7  |
| D3ZGM7_RAT | D3ZGM7 | Peptidase inhibitor 16                                        | Pi16                 | 52.15  | 644.4734  | 2  |
| D3ZGV2_RAT | D3ZGV2 | Peroxisomal membrane protein PEX16                            | Pex16                | 35.30  | 343.32764 | 4  |
| D3ZHA7_RAT | D3ZHA7 | Myosin light chain 6B                                         | RGD1560334_predicted | 22.81  | 6198.9604 | 5  |
| D3ZIE9_RAT | D3ZIE9 | Delta-1-pyrroline-5-carboxylate synthase                      | Aldh18a1             | 87.33  | 369.4042  | 16 |
| D3ZIJ5_RAT | D3ZIJ5 | Dolichyl-phosphate mannosyltransferase subunit 3              | Dpm3                 | 10.09  | 3345.474  | 1  |
| D3ZIP8_RAT | D3ZIP8 | Endonuclease domain containing 1                              | ---                  | 38.11  | 6498.826  | 9  |
| D3ZJ32_RAT | D3ZJ32 | Extended synaptotagmin 2                                      | Esyt2                | 93.95  | 1500.0415 | 16 |
| D3ZJS3_RAT | D3ZJS3 | Translocase of outer mitochondrial membrane 6                 | Tomm6                | 7.89   | 9962.432  | 2  |
| D3ZJX5_RAT | D3ZJX5 | Mitochondrial import inner membrane translocase subunit TIM50 | Timm50               | 39.86  | 1962.5115 | 8  |
| D3ZK56_RAT | D3ZK56 | Ras-related protein Rap-2c                                    | Rap2c                | 20.75  | 31541.605 | 9  |
| D3ZKE6_RAT | D3ZKE6 | Sarcolemmal membrane-associated protein                       | Slmap                | 90.56  | 1028.4661 | 30 |
| D3ZL85_RAT | D3ZL85 | Cytochrome c heme lyase                                       | Hccs                 | 31.13  | 1843.668  | 6  |

|            |        |                                                           |            |        |           |    |
|------------|--------|-----------------------------------------------------------|------------|--------|-----------|----|
| D3ZLC4_RAT | D3ZLC4 | Slc2a6 protein                                            | Slc2a6     | 35.90  | 1620.044  | 5  |
| D3ZLT7_RAT | D3ZLT7 | Uncharacterized protein KIAA2013                          | RGD1305350 | 69.48  | 1386.548  | 6  |
| D3ZM19_RAT | D3ZM19 | Protein EVI2B                                             | Evi2b      | 45.62  | 893.4126  | 4  |
| D3ZMM8_RAT | D3ZMM8 | Solute carrier family 7 member 6                          | Slc7a6     | 56.82  | 422.52615 | 4  |
| D3ZMR1_RAT | D3ZMR1 | Translocase of outer mitochondrial membrane 7             | Tomm7      | 6.18   | 2952.162  | 1  |
| D3ZN21_RAT | D3ZN21 | ATP-dependent RNA helicase DDX3Y                          | Ddx3y      | 72.99  | 1069.654  | 9  |
| D3ZNG3_RAT | D3ZNG3 | Signal peptide peptidase-like 2A                          | Sppl2a     | 59.84  | 411.4917  | 5  |
| D3ZNS8_RAT | D3ZNS8 | Aladin                                                    | Aaas       | 59.36  | 729.3629  | 7  |
| D3ZP13_RAT | D3ZP13 | Sulfhydryl oxidase 2                                      | Qsox2      | 79.20  | 237.4855  | 5  |
| D3ZP98_RAT | D3ZP98 | Minor histocompatibility antigen H13                      | Hm13       | 40.28  | 1971.5709 | 9  |
| D3ZPR0_RAT | D3ZPR0 | Exportin-2                                                | Cse1l      | 110.21 | 443.69458 | 13 |
| D3ZQG9_RAT | D3ZQG9 | RT1 class I locus CE4                                     | RT1-CE4    | 40.08  | 6122.714  | 9  |
| D3ZRN3_RAT | D3ZRN3 | Beta-actin-like protein 2                                 | Actbl2     | 41.96  | 9906.157  | 10 |
| D3ZSA9_RAT | D3ZSA9 | Nodal modulator 1                                         | Nomo1      | 133.44 | 9235.345  | 36 |
| D3ZSY5_RAT | D3ZSY5 | keratin 84                                                | Krt84      | 61.20  | 202.2945  | 3  |
| D3ZTJ0_RAT | D3ZTJ0 | Protein XRP2                                              | Rp2        | 39.32  | 1668.8065 | 9  |
| D3ZU83_RAT | D3ZU83 | Endoplasmic reticulum-Golgi intermediate compartment 3    | Ergic3     | 43.22  | 858.6881  | 6  |
| D3ZUD8_RAT | D3ZUD8 | Transmembrane 9 superfamily member 3                      | Tm9sf3     | 69.97  | 2607.2104 | 13 |
| D3ZUQ7_RAT | D3ZUQ7 | Pantothenate kinase 3                                     | Pank3      | 41.09  | 151.1794  | 1  |
| D3ZUX5_RAT | D3ZUX5 | MICOS complex subunit MIC-19                              | Chchd3     | 26.44  | 7058.3394 | 11 |
| D3ZUZ4_RAT | D3ZUZ4 | Glycosaminoglycan xylosylkinase                           | Fam20b     | 46.57  | 2274.256  | 10 |
| D3ZV75_RAT | D3ZV75 | Major facilitator superfamily domain-containing protein 1 | Mfsd1      | 51.20  | 1743.58   | 3  |
| D3ZWS0_RAT | D3ZWS0 | Protein scribble homolog                                  | Scrib      | 179.85 | 1428.7123 | 20 |
| D3ZWZ1_RAT | D3ZWZ1 | Integrin alpha X                                          | Itgax      | 130.18 | 9389.506  | 41 |
| D3ZXF9_RAT | D3ZXF9 | 39S ribosomal protein L12, mitochondrial                  | Mrpl12     | 29.44  | 1390.9845 | 8  |
| D3ZYM4_RAT | D3ZYM4 | Macrophage stimulating 1 receptor                         | Mst1r      | 150.24 | 69.8444   | 1  |
| D3ZYW2_RAT | Q499R8 | Heterogeneous nuclear ribonucleoprotein H                 | Hnrnph1    | 20.58  | 671.74725 | 7  |
| D3ZZR9_RAT | D3ZZR9 | Peptidylprolyl isomerase                                  | Fkbp2      | 15.39  | 281.2132  | 11 |
| D3ZZS8_RAT | D3ZZS8 | V-type proton ATPase subunit B, kidney isoform            | Atp6v1b1   | 67.25  | 912.30475 | 9  |
| D4A017_RAT | D4A017 | Transmembrane protein 87 A                                | Tmem87a    | 61.67  | 1767.698  | 11 |
| D4A0E2_RAT | D4A0E2 | NSF attachment protein gamma                              | Napg       | 25.60  | 613.8713  | 6  |
| D4A0G7_RAT | D4A0G7 | Ras-related protein Rab-37                                | Rab37      | 24.66  | 6001.734  | 8  |
| D4A0T0_RAT | D4A0T0 | NADH dehydrogenase 1 beta subcomplex subunit 10           | Ndufb10    | 20.86  | 4477.3477 | 8  |
| D4A0T8_RAT | D4A0T8 | Dehydrogenase/reductase SDR family member 7               | Dhrs7      | 38.49  | 3295.6035 | 6  |
| D4A0W1_RAT | D4A0W1 | ER membrane protein complex subunit 4                     | Emc4       | 20.16  | 2497.1655 | 5  |
| D4A133_RAT | D4A133 | V-type proton ATPase catalytic subunit A                  | Atp6v1a    | 68.27  | 5861.986  | 31 |
| D4A1D8_RAT | D4A1D8 | Surfeit 4                                                 | Surf4      | 30.38  | 16413.965 | 7  |
| D4A2H2_RAT | D4A2H2 | Serine palmitoyltransferase 1                             | Sptlc1     | 52.55  | 629.18225 | 7  |

|            |        |                                                                            |          |        |           |    |
|------------|--------|----------------------------------------------------------------------------|----------|--------|-----------|----|
| D4A2Z6_RAT | D4A2Z6 | Translocation protein SEC63 homolog                                        | Sec63    | 83.59  | 2278.4956 | 18 |
| D4A376_RAT | D4A376 | Ras-related protein Rab-12                                                 | Rab12    | 27.38  | 3937.3467 | 5  |
| D4A416_RAT | D4A416 | Cleft lip and palate transmembrane protein 1-like protein                  | Clptm11  | 62.29  | 1412.2905 | 10 |
| D4A465_RAT | D4A465 | Ragulator complex protein LAMTOR2                                          | Lamtor2  | 13.48  | 35403.906 | 6  |
| D4A4J3_RAT | D4A4J3 | Alpha-mannosidase 2x                                                       | Man2a2   | 131.96 | 171.00595 | 5  |
| D4A4T0_RAT | D4A4T0 | STIP1 homology and U box-containing protein 1                              | Stub1    | 34.89  | 338.5735  | 7  |
| D4A533_RAT | D4A533 | Transmembrane anterior posterior transformation protein 1                  | Tapt1    | 69.56  | 319.5562  | 10 |
| D4A5K6_RAT | D4A5K6 | Zinc metallopeptidase STE24                                                | Zmpste24 | 54.85  | 8281.583  | 9  |
| D4A781_RAT | D4A781 | Importin 5                                                                 | Ipo5     | 123.71 | 438.79364 | 13 |
| D4A7Y9_RAT | D4A7Y9 | Essential MCU regulator, mitochondrial                                     | Smdt1    | 11.59  | 1977.516  | 4  |
| D4A994_RAT | D4A994 | ER membrane protein complex subunit 1                                      | Emc1     | 111.19 | 4429.3115 | 21 |
| D4A9L2_RAT | D4A9L2 | Serine/arginine-rich splicing factor 1                                     | Srsf1    | 27.75  | 1289.941  | 5  |
| D4A9X7_RAT | D4A9X7 | Hypermethylated in cancer 2 protein                                        | Hic2     | 67.20  | 609.6509  | 4  |
| D4AA91_RAT | D4AA91 | Ceramide synthase 5                                                        | Cers5    | 51.32  | 805.07056 | 7  |
| D4AAE9_RAT | D4AAE9 | CDGSH iron-sulfur domain-containing protein 2                              | Cisd2    | 15.29  | 24451.86  | 7  |
| D4AAL4_RAT | D4AAL4 | Adhesion G protein-coupled receptor L3                                     | Adgrl3   | 172.45 | 460.62485 | 24 |
| D4ABI7_RAT | D4ABI7 | Very-long-chain (3R)-3-hydroxyacyl-CoA dehydratase                         | Hacd3    | 43.10  | 3264.7783 | 7  |
| D4ABM3_RAT | D4ABM3 | Dishevelled associated activator of morphogenesis 1                        | Daam1    | 112.64 | 2665.12   | 29 |
| D4ABY2_RAT | D4ABY2 | Coatomer subunit gamma 2                                                   | Copg2    | 80.49  | 678.3458  | 11 |
| D4ACG2_RAT | D4ACG2 | Acetolactate synthase-like protein                                         | Ilvbl    | 72.27  | 731.1177  | 12 |
| D4ADE8_RAT | D4ADE8 | ATP-dependent RNA helicase DDX3X                                           | Ddx3x    | 34.34  | 672.98505 | 5  |
| D4ADS9_RAT | D4ADS9 | EFR3 homolog A                                                             | Efr3a    | 92.52  | 3957.558  | 27 |
| D4ADV4_RAT | Q80ZA5 | Sodium-driven chloride bicarbonate exchanger                               | Slc4a10  | 125.64 | 939.1171  | 6  |
| D4AEG2_RAT | D4AEG2 | Ras-related protein Rab-32                                                 | Rab32    | 25.26  | 8105.4756 | 8  |
| DAD1_RAT   | P61805 | Dolichyl-diphosphooligosaccharide protein glycosyltransferase subunit DAD1 | Dad1     | 12.50  | 20682.31  | 3  |
| DHC24_RAT  | Q5BQE6 | Delta(24)-sterol reductase                                                 | Dhcr24   | 60.05  | 924.7401  | 8  |
| DHCR7_RAT  | Q9Z2Z8 | 7-dehydrocholesterol reductase                                             | Dhcr7    | 54.16  | 1749.263  | 9  |
| DHE3_RAT   | P10860 | Glutamate dehydrogenase 1                                                  | Glud1    | 61.42  | 441.7484  | 11 |
| DHPR_RAT   | P11348 | Dihydropteridine reductase                                                 | Qdpr     | 25.55  | 408.2444  | 4  |
| DHSA_RAT   | Q920L2 | Succinate dehydrogenase [ubiquinone] flavoprotein subunit mitochondrial    | Sdha     | 71.62  | 5168.7197 | 23 |
| DHSB_RAT   | P21913 | Succinate dehydrogenase [ubiquinone] iron-sulfur subunit mitochondrial     | Sdhb     | 31.83  | 2446.2795 | 9  |
| E2AK3_RAT  | Q9Z1Z1 | Eukaryotic translation initiation factor 2-alpha kinase 3                  | Eif2ak3  | 124.77 | 602.3982  | 19 |
| E9PT10_RAT | Q861Q1 | MHC class I antigen                                                        | RT1-CE4  | 42.08  | 5165.4585 | 6  |
| E9PT29_RAT | E9PT29 | ATP-dependent RNA helicase DDX17                                           | Ddx17    | 72.46  | 985.8777  | 9  |
| E9PTI1_RAT | E9PTI1 | V-type proton ATPase subunit H                                             | Atp6v1h  | 50.83  | 2445.845  | 6  |
| E9PTU4_RAT | E9PTU4 | Myosin heavy chain 11                                                      | Myh11    | 227.30 | 458.32947 | 28 |
| E9PTW1_RAT | E9PTW1 | Secretory carrier-associated membrane protein                              | Scamp3   | 38.50  | 15290.525 | 8  |
| E9PTX9_RAT | E9PTX9 | Solute carrier family 12 member 2                                          | Slc12a2  | 130.37 | 1066.7125 | 16 |

|            |        |                                                                  |          |        |           |    |
|------------|--------|------------------------------------------------------------------|----------|--------|-----------|----|
| E9PU37_RAT | E9PU37 | Palmitoyltransferase                                             | Zdhhc13  | 70.77  | 750.1116  | 12 |
| E9PU77_RAT | E9PU77 | Synaptotagmin-like protein 3                                     | Syt13    | 68.69  | 2004.4719 | 15 |
| ECHA_RAT   | Q64428 | Trifunctional enzyme subunit alpha                               | Hadha    | 82.67  | 3063.2075 | 23 |
| EF1G_RAT   | Q68FR6 | Elongation factor 1-gamma                                        | Eef1g    | 50.06  | 1391.5375 | 11 |
| EF2_RAT    | P05197 | Elongation factor 2                                              | Eef2     | 95.28  | 1866.2566 | 22 |
| EMC2_RAT   | B0BNG0 | ER membrane protein complex subunit 2                            | Emc2     | 34.87  | 10491.857 | 10 |
| EMC3_RAT   | Q5U2V8 | ER membrane protein complex subunit 3                            | Emc3     | 29.98  | 2137.417  | 8  |
| EMC8_RAT   | Q5FVL2 | ER membrane protein complex subunit 8                            | Emc8     | 23.41  | 10935.938 | 8  |
| ENOA_RAT   | P04764 | Alpha-enolase                                                    | Eno1     | 47.13  | 2993.3784 | 16 |
| ENPL_RAT   | Q66HD0 | Endoplasmin                                                      | Hsp90b1  | 92.77  | 3524.756  | 23 |
| ENPP3_RAT  | P97675 | Ectonucleotide pyrophosphatase/phosphodiesterase family member 3 | Enpp3    | 99.07  | 3102.8271 | 22 |
| ERLN2_RAT  | B5DEH2 | Erlin-2                                                          | Erlin2   | 37.71  | 6296.634  | 13 |
| ESYT1_RAT  | Q9Z1X1 | Extended synaptotagmin 1                                         | Esyt1    | 121.16 | 7809.712  | 43 |
| F1LM66_RAT | F1LM66 | 116 kDa U5 small nuclear ribonucleoprotein component             | Eftud2   | 109.35 | 61.3982   | 1  |
| F1LMG7_RAT | F1LMG7 | Leucine-rich repeat-containing protein 7                         | Lrrc7    | 56.68  | 101.5547  | 3  |
| F1LMK0_RAT | F1LMK0 | A-kinase anchoring protein 1 isoform 2                           | Akap1    | 57.65  | 3006.1821 | 14 |
| F1LMM5_RAT | F1LMM5 | Arachidonate 5-lipoxygenase                                      | Alox5    | 78.13  | 6856.393  | 23 |
| F1LN88_RAT | F1LN88 | Aldehyde dehydrogenase                                           | Aldh2    | 56.52  | 406.324   | 8  |
| F1LNC4_RAT | F1LNC4 | Vesicle transport through interaction with t-SNAREs homolog 1B   | Vti1b    | 23.10  | 7061.8354 | 10 |
| F1LNF0_RAT | F1LNF0 | Myosin heavy chain 14                                            | Myh14    | 228.91 | 502.265   | 28 |
| F1LNT8_RAT | F1LNT8 | VAMP8                                                            | Vamp8    | 11.19  | 10217.439 | 5  |
| F1LNX2_RAT | F1LNX2 | Calcium release-activated calcium channel protein 1 (Orai1)      | Orai1    | 32.44  | 1446.3807 | 2  |
| F1LP82_RAT | F1LP82 | Ras-related protein Rab-2a                                       | Rab2a    | 22.81  | 28618.023 | 13 |
| F1LPK9_RAT | F1LPK9 | Phosphatidylinositol glycan anchor biosynthesis class U protein  | Pigu     | 49.80  | 2507.71   | 3  |
| F1LQ81_RAT | F1LQ81 | Vesicle-fusing ATPase                                            | Nsf      | 82.63  | 10610.1   | 29 |
| F1LQ92_RAT | F1LQ92 | Sel-1 homolog 1                                                  | Sel1l    | 88.44  | 436.3137  | 13 |
| F1LQR8_RAT | F1LQR8 | Inositol 1,4,5-trisphosphate receptor type 2                     | Itpr2    | 234.15 | 1721.356  | 50 |
| F1LRK1_RAT | F1LRK1 | Sodium/potassium-transporting ATPase subunit alpha               | Atp4a    | 114.04 | 929.3479  | 10 |
| F1LRV9_RAT | F1LRV9 | Myosin heavy chain 1                                             | Myh1     | 223.40 | 18.7633   | 1  |
| F1LSI5_RAT | F1LSI5 | Ras GTPase-activating protein 3                                  | Rasa3    | 18.93  | 554.1449  | 18 |
| F1LSV4_RAT | Q3B7D2 | Serine palmitoyltransferase 2                                    | Sptlc2   | 62.96  | 340.8114  | 9  |
| F1LT70_RAT | F1LT70 | Pantothenate kinase 2                                            | Pank2    | 48.70  | 151.1794  | 1  |
| F1LU48_RAT | F1LU48 | Endoplasmic reticulum-golgi intermediate compartment 1           | Ergic1   | 35.01  | 2118.4985 | 8  |
| F1LVC3_RAT | F1LVC3 | Ras-related protein Rab-6b                                       | Rab6b    | 19.88  | 14459.689 | 10 |
| F1LW77_RAT | F1LW77 | Ras-related protein Rab-33b                                      | Rab33b   | 25.75  | 6495.215  | 3  |
| F1LX07_RAT | F1LX07 | Solute carrier family 25 member 12                               | Slc25a12 | 71.92  | 2848.0625 | 19 |
| F1LZW6_RAT | F1LZW6 | Solute carrier family 25 member 13                               | Slc25a13 | 54.10  | 4341.621  | 24 |
| F1LZX9_RAT | F1LZX9 | Integrin alpha 5                                                 | Itgav    | 115.58 | 4434.619  | 32 |

|            |        |                                                             |          |        |           |     |
|------------|--------|-------------------------------------------------------------|----------|--------|-----------|-----|
| F1M0G0_RAT | F1M0G0 | Regulator of G-protein signaling 17                         | Rgs17    | 24.32  | 18100.955 | 8   |
| F1M0J3_RAT | F1M0J3 | Sodium bicarbonate cotransporter 3, isophorm 4              | Slc4a7   | 126.85 | 2402.228  | 25  |
| F1M1U0_RAT | F1M1U0 | Matrix remodeling associated 7                              | Mxra7    | 15.89  | 510.5609  | 1   |
| F1M391_RAT | F1M391 | Stimulator of interferon genes protein                      | Tmem173  | 42.66  | 3505.448  | 6   |
| F1M5Z5_RAT | F1M5Z5 | Anoctamin-6                                                 | Ano6     | 92.23  | 340.6557  | 10  |
| F1M6W2_RAT | F1M6W2 | Endoplasmic reticulum metallopeptidase 1                    | Ermp1    | 99.98  | 1936.6069 | 13  |
| F1M779_RAT | F1M779 | Clathrin heavy chain                                        | Cltc     | 191.56 | 394.4044  | 24  |
| F1M790_RAT | F1M790 | Prostaglandin F2 receptor negative regulator                | Ptgfrn   | 98.67  | 1393.22   | 20  |
| F1M7T6_RAT | F1M7T6 | Translocon-associated protein subunit gamma                 | Ssr3     | 7.38   | 20326.365 | 3   |
| F1M8F6_RAT | F1M8F6 | Myosin heavy chain 8                                        | Myh8     | 166.64 | 18.7633   | 1   |
| F1MA50_RAT | F1MA50 | transmembrane protein 123                                   | Tmem123  | 15.22  | 1612.2595 | 2   |
| F1MA89_RAT | F1MA89 | Cyclin Y                                                    | Ccny     | 39.37  | 839.9437  | 7   |
| F1MAS0_RAT | F1MAS0 | keratin 32                                                  | Krt32    | 51.53  | 1196.745  | 7   |
| F6T9E7_RAT | F6T9E7 | P-selectin glycoprotein ligand 1                            | Selplg   | 44.44  | 739.8876  | 2   |
| F7EP67_RAT | Q6IN10 | Endothelin-converting enzyme 1 Isoform                      | Ece1     | 85.59  | 459.2204  | 15  |
| F7F4S8_RAT | B2RYB8 | Integrin beta 2                                             | Itgb2    | 84.82  | 20343.656 | 36  |
| F7F744_RAT | Q6S395 | Plectin                                                     | Plec     | 517.53 | 3118.4915 | 158 |
| F7FFV2_RAT | F7FFV2 | keratin 5                                                   | Krt5     | 44.02  | 4067.2588 | 12  |
| F7FKI5_RAT | F7FKI5 | Pyruvate dehydrogenase component E1 alpha                   | Pdha1    | 43.11  | 1030.9702 | 12  |
| F7FNS3_RAT | F7FNS3 | Derlin                                                      | Derl1    | 28.85  | 1641.825  | 4   |
| FACR1_RAT  | Q66H50 | Fatty acyl-CoA reductase 1                                  | Far1     | 59.27  | 2376.1807 | 14  |
| FADS2_RAT  | Q9Z122 | Acyl-CoA 6-desaturase                                       | Fads2    | 52.38  | 4900.399  | 10  |
| FAF2_RAT   | Q5BK32 | FAS-associated factor 2                                     | Faf2     | 41.08  | 2111.1401 | 11  |
| FAM3C_RAT  | Q810F4 | Protein FAM3C                                               | Fam3c    | 24.71  | 15365.18  | 10  |
| FCERB_RAT  | P13386 | High affinity immunoglobulin epsilon receptor subunit beta  | Ms4a2    | 26.73  | 17897.814 | 9   |
| FCERG_RAT  | P20411 | High affinity immunoglobulin epsilon receptor subunit gamma | Fcer1g   | 9.77   | 12236.995 | 4   |
| FGOP2_RAT  | Q6TA25 | FGFR1 oncogene partner 2 homolog                            | Fgfr1op2 | 29.37  | 643.8412  | 9   |
| FGR_RAT    | Q6P6U0 | Tyrosine-protein kinase Fgr                                 | Fgr      | 58.82  | 508.04712 | 3   |
| FIS1_RAT   | P84817 | Mitochondrial fission 1 protein                             | Fis1     | 17.00  | 3646.877  | 4   |
| FKBP8_RAT  | Q3B7U9 | Peptidyl-prolyl cis-trans isomerase FKBP8                   | Fkbp8    | 43.56  | 11431.855 | 10  |
| FLOT1_RAT  | Q9Z1E1 | Flotillin-1                                                 | Flot1    | 47.50  | 2314.9595 | 18  |
| FLOT2_RAT  | Q9Z2S9 | Flotillin-2                                                 | Flot2    | 47.04  | 3362.4966 | 17  |
| FRK_RAT    | Q62662 | Tyrosine-protein kinase FRK                                 | Frk      | 58.17  | 76.13575  | 1   |
| FUT8_RAT   | Q6EV76 | Alpha-(1,6)-fucosyltransferase                              | Fut8     | 66.49  | 1289.239  | 12  |
| G3P_RAT    | P04797 | Glyceraldehyde-3-phosphate dehydrogenase                    | Gapdh    | 35.83  | 17496.055 | 14  |
| G3PT_RAT   | Q9ESV6 | Glyceraldehyde-3-phosphate dehydrogenase testis-specific    | Gapdhs   | 46.71  | 2802.8984 | 6   |
| G3V608_RAT | G3V608 | Interleukin-3 receptor subunit beta                         | Csf2rb   | 99.14  | 616.4434  | 14  |
| G3V637_RAT | G3V637 | Syntaxin-binding protein 2, isoform                         | Stxbp2   | 66.65  | 3765.574  | 24  |



|            |        |                                                         |              |        |           |    |
|------------|--------|---------------------------------------------------------|--------------|--------|-----------|----|
| G3V667_RAT | G3V667 | Integrin alpha 6                                        | Itga6        | 119.48 | 743.091   | 17 |
| G3V679_RAT | G3V679 | Transferrin receptor protein 1                          | Tfrc         | 85.88  | 3309.5024 | 26 |
| G3V6D3_RAT | G3V6D3 | ATP synthase subunit beta                               | Atp5f1b      | 56.35  | 51747.17  | 23 |
| G3V6E1_RAT | G3V6E1 | Myosin heavy chain 2                                    | Myh2         | 219.58 | 18.7633   | 1  |
| G3V6H0_RAT | G3V6H0 | Ras-related protein Rab-1b                              | LOC100363782 | 22.18  | 55245.715 | 14 |
| G3V6H5_RAT | G3V6H5 | Solute carrier family 25 member 11                      | Slc25a11     | 34.14  | 3730.7212 | 12 |
| G3V6N2_RAT | G3V6N2 | Transmembrane emp24 domain-containing protein 4         | Tmed4        | 26.12  | 10377.479 | 9  |
| G3V6P7_RAT | G3V6P7 | Myosin heavy chain 9                                    | Myh9         | 226.41 | 7561.104  | 86 |
| G3V6P8_RAT | G3V6P8 | Guanine nucleotide-binding protein gamma-12             | Gng12        | 7.99   | 77053.73  | 5  |
| G3V6R4_RAT | G3V6R4 | Leucine-rich repeat-containing protein 1                | Lrrc1        | 59.39  | 2278.051  | 15 |
| G3V6T1_RAT | G3V6T1 | Coatomer subunit alpha                                  | Copa         | 138.36 | 777.2628  | 27 |
| G3V6W2_RAT | G3V6W2 | Prolactin regulatory element-binding protein            | Preb         | 45.37  | 6251.9053 | 13 |
| G3V712_RAT | G3V712 | keratin 7                                               | Krt7         | 50.81  | 490.895   | 9  |
| G3V741_RAT | G3V741 | Solute carrier family 25 member 3                       | Slc25a3      | 39.53  | 20163.805 | 20 |
| G3V784_RAT | G3V784 | ADP-dependent glucokinase                               | Adpgk        | 53.92  | 1159.181  | 10 |
| G3V7A5_RAT | G3V7A5 | Low density lipoprotein receptor isoform                | Ldlr         | 96.65  | 1045.3892 | 14 |
| G3V7I0_RAT | G3V7I0 | Peroxiredoxin-3                                         | Prdx3        | 28.30  | 1017.8773 | 7  |
| G3V7I3_RAT | G3V7I3 | Manganese-transporting ATPase 13A1                      | Atp13a1      | 131.92 | 3255.567  | 36 |
| G3V7L8_RAT | G3V7L8 | V-type proton ATPase subunit E 1 isoform                | Atp6v1e1     | 26.14  | 295.3137  | 12 |
| G3V7M2_RAT | G3V7M2 | Integrin beta 7                                         | Itgb7        | 87.63  | 943.3401  | 13 |
| G3V7N0_RAT | G3V7N0 | Heparan sulfate 2-O-sulfotransferase 1                  | Hs2st1       | 41.85  | 2052.1785 | 9  |
| G3V7N6_RAT | G3V7N6 | Lysophospholipid acyltransferase 7                      | Mboat7l1     | 53.38  | 6267.8555 | 4  |
| G3V7Q7_RAT | G3V7Q7 | Ras GTPase-activating-like protein IQGAP1               | Iqgap1       | 188.83 | 242.0032  | 20 |
| G3V7U6_RAT | G3V7U6 | Calpain 5                                               | Capn5        | 84.51  | 2057.5771 | 20 |
| G3V7Y9_RAT | P28494 | Alpha-mannosidase 2                                     | Man2a1       | 131.24 | 3329.9321 | 30 |
| G3V878_RAT | G3V878 | Signal peptidase complex catalytic subunit SEC11        | Sec11c       | 21.66  | 4794.677  | 6  |
| G3V887_RAT | G3V887 | V-type proton ATPase subunit A                          | Tcirg1       | 93.21  | 1935.7375 | 14 |
| G3V8F5_RAT | G3V8F5 | Mitochondrial import receptor subunit TOM40 homolog     | Tomm40       | 37.92  | 5112.55   | 10 |
| G3V8G5_RAT | G3V8G5 | Golgi apparatus protein 1                               | Glg1         | 133.55 | 5129.583  | 42 |
| G3V8I4_RAT | G3V8I4 | Syntaxin-4A                                             | Stx4         | 34.20  | 1110.8849 | 8  |
| G3V8L7_RAT | G3V8L7 | Integrin alpha M                                        | Itgam        | 127.19 | 2563.312  | 30 |
| G3V8Q1_RAT | G3V8Q1 | Coatomer subunit epsilon                                | Cope         | 34.65  | 1239.242  | 8  |
| G3V8V4_RAT | G3V8V4 | Ceramide synthase 2                                     | Cers2        | 44.95  | 1771.848  | 5  |
| G3V8Z1_RAT | G3V8Z1 | Linker for activation of T-cells family member 2 (NTAL) | Lat2         | 23.10  | 6248.498  | 3  |
| G3V908_RAT | G3V908 | keratin, type II Kb15                                   | Kb15         | 57.61  | 7247.892  | 15 |
| G3V936_RAT | G3V936 | Citrate synthase                                        | Cs           | 51.83  | 1031.1398 | 6  |
| G3V964_RAT | G3V964 | Neurotrimin                                             | Ntm          | 37.62  | 943.8691  | 6  |
| G3V9N0_RAT | G3V9N0 | Polyadenylate-binding protein 4                         | Pabpc4       | 70.83  | 1690.4026 | 16 |

|            |        |                                                                   |                             |        |           |    |
|------------|--------|-------------------------------------------------------------------|-----------------------------|--------|-----------|----|
| G3V9N9_RAT | G3V9N9 | alpha-1,2-Mannosidase                                             | Man1a1                      | 73.13  | 1150.4861 | 16 |
| G3V9S3_RAT | G3V9S3 | Tyrosine-protein phosphatase non-receptor type 13                 | Ptpn13                      | 270.44 | 13.86     | 1  |
| G3V9U7_RAT | G3V9U7 | Sarcoplasmic/endoplasmic reticulum calcium ATPase 3 (SERCA3)      | Atp2a3                      | 109.37 | 8865.377  | 29 |
| G3V9W2_RAT | G3V9W2 | Tyrosine-protein kinase JAK1                                      | Jak1                        | 133.26 | 264.684   | 22 |
| G3V9X8_RAT | G3V9X8 | Magnesium transporter protein 1                                   | Magt1                       | 37.94  | 919.5995  | 4  |
| G3V9Y2_RAT | G3V9Y2 | Phospholipid phosphatase 1                                        | Plpp1                       | 31.91  | 616.2256  | 3  |
| GALT1_RAT  | Q10473 | Polypeptide N-acetylgalactosaminyltransferase 1                   | Galnt1                      | 64.23  | 828.2299  | 13 |
| GALT7_RAT  | Q9R0C5 | Polypeptide N-acetylgalactosaminyltransferase 7                   | Galnt7                      | 75.34  | 2017.703  | 13 |
| GBB1_RAT   | P54311 | Transducin beta-1                                                 | Gnb1                        | 37.38  | 40187.645 | 18 |
| GBB2_RAT   | P54313 | Transducin beta-2                                                 | Gnb2                        | 37.33  | 53010.633 | 16 |
| GBB4_RAT   | O35353 | Transducin beta-4                                                 | Gnb4                        | 37.36  | 18455     | 12 |
| GFAP_RAT   | P47819 | Glial fibrillary acidic protein                                   | Gfap                        | 49.96  | 3110.5884 | 10 |
| GHITM_RAT  | Q5XIA8 | Growth hormone-inducible transmembrane protein                    | Ghitm                       | 37.18  | 1950.2825 | 5  |
| GL8D1_RAT  | Q6AYF6 | Glycosyltransferase 8 domain-containing protein 1                 | Glt8d1                      | 42.14  | 669.46295 | 5  |
| GNA11_RAT  | Q9JID2 | Guanine nucleotide-binding protein alpha-11                       | Gna11                       | 42.03  | 7346.748  | 10 |
| GNAI2_RAT  | P04897 | Guanine nucleotide-binding protein G(i) subunit alpha-2           | Gnai2                       | 40.50  | 78538.42  | 26 |
| GNAI3_RAT  | P08753 | Guanine nucleotide-binding protein G(k) subunit alpha             | Gnai3                       | 40.52  | 49947.156 | 24 |
| GNAQ_RAT   | P82471 | Guanine nucleotide-binding protein G(q) subunit alpha             | Gnaq                        | 42.14  | 7457.616  | 15 |
| GNAS2_RAT  | P63095 | Guanine nucleotide-binding protein G(s) subunit alpha             | Gnas                        | 45.66  | 16917.3   | 16 |
| GNAZ_RAT   | P19627 | Guanine nucleotide-binding protein G(z) subunit alpha             | Gnaz                        | 40.88  | 8040.4985 | 13 |
| GOGA2_RAT  | Q62839 | Golgin subfamily A member 2                                       | Golga2                      | 112.87 | 286.6845  | 12 |
| GOGA7_RAT  | Q6AYQ1 | Golgin subfamily A member 7                                       | Golga7                      | 15.78  | 2409.3254 | 4  |
| GOLI4_RAT  | Q5BJK8 | Golgi integral membrane protein 4                                 | Golim4                      | 76.60  | 4551.551  | 16 |
| GOSR2_RAT  | O35165 | Golgi SNAP receptor complex member 2                              | Gosr2                       | 24.61  | 1689.4465 | 4  |
| GPDM_RAT   | P35571 | Glycerol-3-phosphate dehydrogenase mitochondrial                  | Gpd2                        | 80.97  | 1379.1694 | 17 |
| GPSM3_RAT  | Q6MG88 | G-protein-signaling modulator 3                                   | Gpsm3                       | 17.49  | 2360.417  | 3  |
| GRP75_RAT  | P48721 | Mortalin                                                          | Hspa9                       | 73.86  | 973.8264  | 18 |
| GRP78_RAT  | P06761 | Endoplasmic reticulum chaperone BiP                               | Hspa5                       | 72.35  | 13030.68  | 26 |
| GTR1_RAT   | P11167 | Solute carrier family 2, facilitated glucose transporter member 1 | Slc2a1                      | 53.96  | 2702.7566 | 7  |
| GTR3_RAT   | Q07647 | Solute carrier family 2, facilitated glucose transporter member 3 | Slc2a3                      | 53.58  | 37964.523 | 11 |
| H14_RAT    | P15865 | Histone H1.4                                                      | Hist1h1e                    | 21.99  | 1016.0143 | 4  |
| H4_RAT     | P62804 | Histone H4                                                        | Hist1h4b; Hist1h4m; Hist4h4 | 11.37  | 2001.5176 | 5  |
| HA12_RAT   | P16391 | RT1 class I histocompatibility antigen AA alpha chain             | ---                         | 41.83  | 15494.76  | 14 |
| HMOX1_RAT  | P06762 | Heme oxygenase 1                                                  | Hmox1                       | 33.01  | 8042.461  | 12 |
| HMOX2_RAT  | P23711 | Heme oxygenase 2                                                  | Hmox2                       | 35.76  | 2565.247  | 10 |
| HNRPF_RAT  | Q794E4 | Heterogeneous nuclear ribonucleoprotein F                         | Hnrnpf                      | 45.73  | 286.0756  | 6  |
| HRG1_RAT   | B0BNL4 | Heme transporter HRG1                                             | Slc48a1                     | 16.62  | 820.79425 | 8  |
| HS90A_RAT  | P82995 | Heat shock protein HSP 90-alpha                                   | Hsp90aa1                    | 84.82  | 8623.396  | 18 |

|           |        |                                                                |          |        |           |    |
|-----------|--------|----------------------------------------------------------------|----------|--------|-----------|----|
| HS90B_RAT | P34058 | Heat shock protein HSP 90-beta                                 | Hsp90ab1 | 83.28  | 11356.891 | 27 |
| HSP72_RAT | P14659 | Heat shock-related 70 kDa protein 2                            | Hspa2    | 69.64  | 14908.165 | 16 |
| HSP7C_RAT | P63018 | Heat shock cognate 71 kDa protein                              | Hspa8    | 70.87  | 41142.43  | 29 |
| ICAM1_RAT | Q00238 | Intercellular adhesion molecule 1 (ICAM1)                      | Icam1    | 60.14  | 3709.9238 | 12 |
| IF4A2_RAT | Q5RKI1 | Eukaryotic initiation factor 4A-II                             | Eif4a2   | 46.40  | 547.23773 | 6  |
| IKIP_RAT  | Q5EAJ6 | Inhibitor kappa-B kinase-interacting protein                   | Ikbip    | 42.36  | 1422.366  | 9  |
| ILRL1_RAT | Q62611 | Interleukin 1 receptor-like 1                                  | Il1rl1   | 64.41  | 9368.721  | 16 |
| IMB1_RAT  | P52296 | Importin subunit beta-1                                        | Kpnb1    | 97.12  | 663.5588  | 12 |
| IMMT_RAT  | Q3KR86 | MICOS complex subunit Mic60                                    | Immt     | 67.18  | 11029.786 | 21 |
| IMPA3_RAT | D4AD37 | Inositol monophosphatase 3                                     | Impad1   | 38.57  | 5946.5176 | 7  |
| IR3IP_RAT | P85007 | Immediate early response 3-interacting protein 1               | Ier3ip1  | 9.00   | 43136.105 | 2  |
| IRK2_RAT  | Q64273 | Inward rectifier potassium channel 2                           | Kcnj2    | 48.20  | 453.43683 | 3  |
| ITAD_RAT  | Q9QYE7 | Integrin alpha D                                               | Itgad    | 126.60 | 915.6053  | 12 |
| ITB1_RAT  | P49134 | Integrin beta 1                                                | Itgb1    | 88.50  | 10606.656 | 20 |
| ITFG3_RAT | Q5M7W6 | Protein FAM234A                                                | Fam234a  | 60.64  | 364.1404  | 6  |
| ITM2B_RAT | Q5XIE8 | Integral membrane protein 2B                                   | Itm2b    | 30.31  | 1399.8596 | 6  |
| ITM2C_RAT | Q5PQL7 | Integral membrane protein 2C                                   | Itm2c    | 30.48  | 8972.389  | 10 |
| ITPR2_RAT | P29995 | Inositol 1,4,5-trisphosphate receptor type 2                   | Itpr2    | 307.06 | 1859.219  | 59 |
| ITPR3_RAT | Q63269 | Inositol 1,4,5-trisphosphate receptor type 3                   | Itpr3    | 304.29 | 268.3315  | 38 |
| K1C10_RAT | Q6IFW6 | Keratin, type I cytoskeletal 10                                | Krt10    | 56.51  | 3125.5767 | 13 |
| K1C14_RAT | Q6IFV1 | Keratin, type I cytoskeletal 14                                | Krt14    | 52.68  | 1947.469  | 9  |
| K1C15_RAT | Q6IFV3 | Keratin, type I cytoskeletal 15                                | Krt15    | 48.87  | 2066.3047 | 9  |
| K1C17_RAT | Q6IFU8 | Keratin, type I cytoskeletal 17                                | Krt17    | 48.12  | 1520.085  | 9  |
| K1C18_RAT | Q5BJY9 | Keratin, type I cytoskeletal 18                                | Krt18    | 47.76  | 1424.4766 | 7  |
| K1C42_RAT | Q6IFU7 | Keratin, type I cytoskeletal 42                                | Krt42    | 50.21  | 1341.0945 | 10 |
| K22E_RAT  | Q6IG02 | Keratin, type II cytoskeletal 2 epidermal                      | Krt2     | 69.13  | 1619.1815 | 8  |
| K2C1_RAT  | Q6IMF3 | Keratin, type II cytoskeletal 1                                | Krt1     | 64.83  | 6467.131  | 15 |
| K2C1B_RAT | Q6IG01 | Keratin, type II cytoskeletal 1B                               | Krt77    | 57.26  | 2745.867  | 9  |
| K2C4_RAT  | Q6IG00 | Keratin, type II cytoskeletal 4                                | Krt4     | 57.67  | 779.46643 | 13 |
| K2C6A_RAT | Q4FZU2 | Keratin, type II cytoskeletal 6A                               | Krt6a    | 59.25  | 5880.4443 | 11 |
| K2C7_RAT  | Q6IG12 | Keratin, type II cytoskeletal 7                                | Krt7     | 50.71  | 3154.8394 | 12 |
| K2C73_RAT | Q6IG03 | Keratin, type II cytoskeletal 73                               | Krt73    | 60.39  | 5609.4053 | 11 |
| K2C75_RAT | Q6IG05 | Keratin, type II cytoskeletal 75                               | Krt75    | 59.03  | 3936.6782 | 12 |
| K2C8_RAT  | Q10758 | Keratin, type II cytoskeletal 8                                | Krt8     | 54.02  | 3248.8926 | 12 |
| KAP2_RAT  | P12368 | cAMP-dependent protein kinase type II-alpha regulatory subunit | Prkar2a  | 45.48  | 450.8543  | 5  |
| KC1G1_RAT | Q62761 | Casein kinase I isoform gamma-1                                | Csnk1g1  | 45.13  | 1386.6904 | 13 |
| KC1G2_RAT | Q62762 | Casein kinase I isoform gamma-2                                | Csnk1g2  | 47.64  | 1022.759  | 10 |
| KC1G3_RAT | Q62763 | Casein kinase I isoform gamma-3                                | Csnk1g3  | 51.43  | 2977.0906 | 14 |

|            |        |                                                                        |         |        |           |    |
|------------|--------|------------------------------------------------------------------------|---------|--------|-----------|----|
| KPYM_RAT   | P11980 | Pyruvate kinase PKM                                                    | Pkm     | 57.82  | 3335.2876 | 14 |
| LAMP1_RAT  | P14562 | Lysosome-associated membrane glycoprotein 1 (Lamp1)                    | Lamp1   | 43.97  | 2130.0125 | 7  |
| LAMP2_RAT  | P17046 | Lysosome-associated membrane glycoprotein 2 (Lamp2)                    | Lamp2   | 45.16  | 1748.5774 | 4  |
| LAP2_RAT   | Q62733 | Lamina-associated polypeptide 2 isoform beta                           | Tmpo    | 50.28  | 3172.5151 | 12 |
| LAT_RAT    | O70601 | Linker for activation of T-cells family member 1 (LAT)                 | Lat     | 26.19  | 4592.621  | 7  |
| LAT1_RAT   | Q63016 | Large neutral amino acids transporter small subunit 1                  | Slc7a5  | 55.90  | 1773.999  | 7  |
| LBR_RAT    | O08984 | Lamin-B receptor                                                       | Lbr     | 70.72  | 2114.675  | 11 |
| LDHA_RAT   | P04642 | L-lactate dehydrogenase A chain                                        | Ldha    | 36.45  | 1576.633  | 9  |
| LDLR_RAT   | P35952 | Low-density lipoprotein receptor                                       | Ldlr    | 96.62  | 1431.886  | 14 |
| LETM1_RAT  | Q5XIN6 | Mitochondrial proton/calcium exchanger protein                         | Letm1   | 83.06  | 826.77905 | 13 |
| LEUK_RAT   | P13838 | Leukosialin                                                            | Spn     | 38.43  | 1175.2317 | 5  |
| LMAN1_RAT  | Q62902 | Lectin mannose-binding 1                                               | Lman1   | 57.96  | 6617.7812 | 13 |
| LMBD1_RAT  | Q6AZ61 | Probable lysosomal cobalamin transporter                               | Lmbrd1  | 61.02  | 826.9542  | 1  |
| LMF2_RAT   | A1L1J9 | Lipase maturation factor 2                                             | Lmf2    | 80.25  | 1244.6265 | 7  |
| LPPRC_RAT  | Q5SGE0 | Leucine-rich PPR motif-containing protein mitochondrial                | Lrpprc  | 156.65 | 1723.363  | 33 |
| LRC59_RAT  | Q5RJR8 | Leucine-rich repeat-containing protein 59                              | Lrrc59  | 34.87  | 9316.835  | 11 |
| LTOR1_RAT  | Q6P791 | Ragulator complex protein LAMTOR1                                      | Lamtor1 | 17.72  | 20131.82  | 11 |
| LTOR3_RAT  | Q5U204 | Ragulator complex protein LAMTOR3                                      | Lamtor3 | 13.58  | 18707.53  | 4  |
| LYN_RAT    | Q07014 | Tyrosine-protein kinase Lyn                                            | Lyn     | 58.66  | 62104.484 | 33 |
| M0R402_RAT | M0R402 | Protein disulfide-isomerase TMX3                                       | Tmx3    | 52.10  | 759.8056  | 10 |
| M0RAJ8_RAT | M0RAJ8 | 40S ribosomal protein S2                                               | ---     | 31.41  | 2199.025  | 4  |
| M0RBJ0_RAT | M0RBJ0 | Guanine nucleotide-binding protein gamma-2                             | Gng2    | 4.88   | 51315.395 | 5  |
| M0RC99_RAT | M0RC99 | Ras-related protein Rab-5a                                             | Rab5a   | 23.63  | 7851.471  | 7  |
| M0RCA3_RAT | M0RCA3 | Zinc finger protein-like 1                                             | Zfpl1   | 34.25  | 2976.191  | 6  |
| M0RCF3_RAT | M0RCF3 | Integrin beta 3                                                        | Itgb3   | 87.08  | 4581.119  | 21 |
| M0RCS2_RAT | M0RCS2 | Transducin beta-like protein 2                                         | Tbl2    | 17.40  | 1252.123  | 13 |
| M0RD75_RAT | M0RD75 | 40S ribosomal protein S6                                               | Rps6    | 28.42  | 2664.179  | 7  |
| M0RDI5_RAT | M0RDI5 | Mitochondrial calcium uniporter                                        | Mcu     | 39.76  | 1066.463  | 7  |
| MAVS_RAT   | Q66HG9 | Mitochondrial antiviral-signaling protein                              | Mavs    | 53.81  | 1582.96   | 8  |
| MBOA5_RAT  | Q5FVN0 | Lysophospholipid acyltransferase 5                                     | Lpcat3  | 56.02  | 4474.037  | 8  |
| MDHM_RAT   | P04636 | Malate dehydrogenase mitochondrial                                     | Mdh2    | 35.68  | 1374.79   | 9  |
| MGAT2_RAT  | Q09326 | Alpha-1,6-mannosyl-glycoprotein 2-beta-N-acetylglucosaminyltransferase | Mgat2   | 51.11  | 1614.162  | 11 |
| MIRO2_RAT  | Q7TSA0 | Mitochondrial Rho GTPase 2                                             | Rhot2   | 69.15  | 564.2921  | 9  |
| MLEC_RAT   | Q5FVQ4 | Malectin                                                               | Mlec    | 32.42  | 17085.227 | 13 |
| MMGT1_RAT  | B5DF51 | Membrane magnesium transporter 1                                       | Mmgt1   | 14.68  | 4324.251  | 2  |
| MOGS_RAT   | O88941 | Mannosyl-oligosaccharide glucosidase                                   | Mogs    | 91.87  | 726.93286 | 16 |
| MOSC2_RAT  | O88994 | Mitochondrial amidoxime reducing component 2                           | Marc2   | 38.25  | 1441.2881 | 8  |
| MOT1_RAT   | P53987 | Monocarboxylate transporter 1                                          | Slc16a1 | 53.24  | 9277.2    | 7  |

|            |        |                                                                         |          |        |           |    |
|------------|--------|-------------------------------------------------------------------------|----------|--------|-----------|----|
| MRLCA_RAT  | P13832 | Myosin regulatory light chain RLC-A                                     | Rlc-a    | 19.90  | 2851.8682 | 7  |
| MSMO1_RAT  | O35532 | Methylsterol monooxygenase 1                                            | Msmo1    | 34.96  | 3108.441  | 3  |
| MYH10_RAT  | Q9JLT0 | Myosin heavy chain 10                                                   | Myh10    | 228.97 | 502.0399  | 26 |
| MYL6_RAT   | Q64119 | Myosin light polypeptide 6                                              | Myl6     | 16.98  | 12424.145 | 9  |
| NB5R3_RAT  | P20070 | NADH-cytochrome b5 reductase 3                                          | Cyb5r3   | 34.18  | 2120.4146 | 7  |
| NCLN_RAT   | Q5XIA1 | Nicalin                                                                 | Ncln     | 62.99  | 6718.4053 | 13 |
| NCPR_RAT   | P00388 | NADPH--cytochrome P450 reductase                                        | Por      | 76.96  | 9740.773  | 30 |
| NCUG1_RAT  | Q68FV6 | Glycosylated lysosomal membrane protein                                 | Glmp     | 43.87  | 517.7008  | 2  |
| NDUAA_RAT  | Q561S0 | NADH dehydrogenase [ubiquinone] 1 alpha subcomplex subunit 10           | Ndufa10  | 40.49  | 412.8998  | 6  |
| NDUF5_RAT  | B2GV71 | NADH dehydrogenase [ubiquinone] 1 alpha subcomplex assembly factor 5    | Ndufaf5  | 38.23  | 310.12567 | 3  |
| NDUS1_RAT  | Q66HF1 | NADH-ubiquinone oxidoreductase 75 kDa subunit mitochondrial             | Ndufs1   | 79.41  | 1264.7273 | 19 |
| NDUS2_RAT  | Q641Y2 | NADH dehydrogenase [ubiquinone] iron-sulfur protein 2                   | Ndufs2   | 52.56  | 838.103   | 9  |
| NDUV2_RAT  | P19234 | NADH dehydrogenase [ubiquinone] flavoprotein 2 mitochondrial            | Ndufv2   | 27.38  | 2760.076  | 8  |
| NICA_RAT   | Q8CGU6 | Nicastrin                                                               | Ncstn    | 78.40  | 7369.522  | 12 |
| NPTN_RAT   | P97546 | Neuroplastin                                                            | Nptn     | 43.93  | 624.8021  | 6  |
| NUCB1_RAT  | Q63083 | Nucleobindin-1                                                          | Nucb1    | 53.51  | 2050.4395 | 16 |
| NUCB2_RAT  | Q9JI85 | Nucleobindin-2                                                          | Nucb2    | 50.09  | 4984.8174 | 17 |
| NUCL_RAT   | P13383 | Nucleolin                                                               | Ncl      | 77.15  | 3949.7266 | 21 |
| O89035_RAT | O89035 | Solute carrier family 25 member 10                                      | Slc25a10 | 31.46  | 1959.6011 | 10 |
| OCAD1_RAT  | Q5XIG4 | OCIA domain-containing protein 1                                        | Ociad1   | 27.66  | 2874.1665 | 6  |
| ODO1_RAT   | Q5XI78 | 2-oxoglutarate dehydrogenase complex component E1                       | Ogdh     | 116.30 | 462.29266 | 18 |
| ODO2_RAT   | Q01205 | 2-oxoglutarate dehydrogenase complex component E2                       | Dlst     | 48.93  | 1009.41   | 8  |
| ODP2_RAT   | P08461 | Pyruvate dehydrogenase component E2                                     | Dlat     | 67.17  | 1237.4315 | 15 |
| ODPB_RAT   | P49432 | Pyruvate dehydrogenase component E1 beta                                | Pdhb     | 38.98  | 3007.9316 | 11 |
| OGFD3_RAT  | Q5M843 | 2-oxoglutarate and iron-dependent oxygenase domain-containing protein 3 | Ogfod3   | 35.39  | 1258.4572 | 6  |
| OS9_RAT    | Q5RKH6 | Protein OS-9                                                            | Os9      | 75.37  | 1507.2655 | 18 |
| OST48_RAT  | Q641Y0 | Oligosaccharyl transferase 48 kDa subunit                               | Ddost    | 48.90  | 22532.98  | 17 |
| P2RX4_RAT  | P51577 | P2X purinoceptor 4                                                      | P2rx4    | 43.50  | 2251.637  | 9  |
| P4K2B_RAT  | Q5XIL2 | Phosphatidylinositol 4-kinase type 2-beta                               | Pi4k2b   | 54.46  | 1195.6467 | 11 |
| PABP1_RAT  | Q9EPH8 | Polyadenylate-binding protein 1                                         | Pabpc1   | 70.70  | 2639.031  | 20 |
| PBIP1_RAT  | A2VD12 | Pre-B-cell leukemia transcription factor-interacting protein 1          | Pbxip1   | 80.28  | 925.7483  | 12 |
| PCAT2_RAT  | P0C1Q3 | Lysophosphatidylcholine acyltransferase 2                               | Lpcat2   | 59.83  | 698.8402  | 7  |
| PDE3B_RAT  | Q63085 | Cyclic GMP-inhibited phosphodiesterase B                                | Pde3b    | 123.11 | 821.0266  | 20 |
| PDIA1_RAT  | P04785 | Protein disulfide-isomerase                                             | P4hb     | 56.95  | 3330.268  | 18 |
| PDIA3_RAT  | P11598 | Protein disulfide-isomerase A3                                          | Pdia3    | 56.62  | 17165.145 | 28 |
| PECA1_RAT  | Q3SWT0 | Platelet endothelial cell adhesion molecule (Pecam1)                    | Pecam1   | 76.19  | 2114.614  | 16 |
| PGFRB_RAT  | Q05030 | Platelet-derived growth factor receptor beta                            | Pdgfrb   | 122.83 | 184.1114  | 6  |
| PGRC1_RAT  | P70580 | Membrane-associated progesterone receptor component 1                   | Pgrmc1   | 21.60  | 8160.259  | 11 |

|            |        |                                                                  |          |        |           |    |
|------------|--------|------------------------------------------------------------------|----------|--------|-----------|----|
| PGRC2_RAT  | Q5XIU9 | Membrane-associated progesterone receptor component 2            | Pgrmc2   | 23.40  | 13782.562 | 10 |
| PHB_RAT    | P67779 | Prohibitin                                                       | Phb      | 29.82  | 39984.395 | 17 |
| PHB2_RAT   | Q5XIH7 | Prohibitin 2                                                     | Phb2     | 33.31  | 23869.629 | 17 |
| PHOCN_RAT  | Q9QYW3 | MOB-like protein phocein                                         | Mob4     | 26.03  | 2233.6565 | 6  |
| PIGS_RAT   | Q5XI31 | GPI transamidase component PIG-S                                 | Pigs     | 61.72  | 3193.355  | 14 |
| PLF4_RAT   | P06765 | Platelet factor 4                                                | Pf4      | 11.29  | 1582.359  | 2  |
| PLP2_RAT   | Q6P742 | Proteolipid protein 2                                            | Plp2     | 16.56  | 7078.4824 | 3  |
| PLS1_RAT   | P58195 | Phospholipid scramblase 1                                        | Plscr1   | 36.71  | 11390.705 | 6  |
| PLS3_RAT   | Q6QBQ4 | Phospholipid scramblase 3                                        | Plscr3   | 31.65  | 754.14386 | 4  |
| PORED_RAT  | Q5RJM1 | 3-oxo-5-alpha-steroid 4-dehydrogenase 3                          | Srd5a3   | 38.09  | 2307.13   | 5  |
| PP1A_RAT   | P62138 | Serine/threonine-protein phosphatase PP1-alpha catalytic subunit | Ppp1ca   | 37.51  | 741.3635  | 10 |
| PPIA_RAT   | P10111 | Peptidyl-prolyl cis-trans isomerase A                            | Ppia     | 17.87  | 813.9749  | 11 |
| PPIB_RAT   | P24368 | Peptidyl-prolyl cis-trans isomerase B                            | Ppib     | 23.80  | 322.5537  | 5  |
| PRAF3_RAT  | Q9ES40 | PRA1 family protein 3                                            | Arl6ip5  | 21.55  | 2357.312  | 8  |
| PRDX1_RAT  | Q63716 | Peroxiredoxin-1                                                  | Prdx1    | 22.11  | 2065.4648 | 8  |
| PRDX3_RAT  | Q9Z0V6 | Thioredoxin-dependent peroxide reductase mitochondrial           | Prdx3    | 28.30  | 917.41174 | 6  |
| PROF1_RAT  | P62963 | Profilin-1                                                       | Pfn1     | 14.96  | 1022.584  | 4  |
| PSN1_RAT   | P97887 | Presenilin-1                                                     | Psen1    | 52.79  | 409.77258 | 4  |
| PSN2_RAT   | O88777 | Presenilin-2                                                     | Psen2    | 50.05  | 459.7473  | 4  |
| PTN1_RAT   | P20417 | Protein-tyrosine phosphatase 1B                                  | Ptpn1    | 49.67  | 6730.742  | 15 |
| PTPRC_RAT  | P04157 | Receptor-type tyrosine-protein phosphatase C (CD45)              | Ptprc    | 143.27 | 2727.253  | 34 |
| Q0R3W9_RAT | Q0R3W9 | GTPase, IMAP family member 1                                     | Gimap1   | 33.31  | 6332.2266 | 12 |
| Q2I6B1_RAT | Q2I6B1 | V-type proton ATPase subunit A2                                  | Atp6v0a2 | 98.04  | 1081.5837 | 17 |
| Q2I6B2_RAT | Q2I6B2 | V-type proton ATPase subunit A1                                  | Atp6v0a1 | 95.59  | 10632.083 | 29 |
| Q2IBC7_RAT | Q2IBC7 | Hepatocyte growth factor receptor                                | Met      | 153.96 | 82.4271   | 1  |
| Q32PX6_RAT | Q32PX6 | Rho-related GTP-binding protein RhoG                             | Rhog     | 21.31  | 27716     | 14 |
| Q3B7V5_RAT | Q3B7V5 | Ras-related protein Rab-2b                                       | Rab2b    | 24.09  | 12735.811 | 11 |
| Q3KRC3_RAT | Q3KRC3 | Signal recognition particle receptor alpha                       | Srpra    | 69.66  | 2062.8618 | 11 |
| Q3MHS9_RAT | Q3MHS9 | Chaperonin-containing TCP1 subunit 6A                            | Cct6a    | 58.02  | 915.759   | 10 |
| Q497A2_RAT | Q497A2 | Solute carrier family 35 member B2                               | Slc35b2  | 47.30  | 956.06506 | 5  |
| Q4KM97_RAT | Q4KM97 | Tyrosine-protein kinase BLK                                      | Blk      | 56.65  | 491.4534  | 6  |
| Q4QQS6_RAT | Q4QQS6 | Dolichyl-phosphate beta-glucosyltransferase                      | Alg5     | 36.86  | 1178.263  | 8  |
| Q4QQV0_RAT | Q4QQV0 | Tubulin beta-6                                                   | Tubb6    | 50.06  | 3483.87   | 8  |
| Q4V7D1_RAT | Q4V7D1 | Translocon-associated protein subunit alpha                      | Ssr1     | 32.21  | 14023.68  | 5  |
| Q4V7D9_RAT | Q4V7D9 | Acid sphingomyelinase-like phosphodiesterase 3B                  | Smpdl3b  | 51.65  | 9802.894  | 12 |
| Q4V8N6_RAT | Q4V8N6 | Solute carrier organic anion transporter family member 2A1       | Slco4a1  | 77.69  | 705.52014 | 9  |
| Q52KJ9_RAT | Q52KJ9 | Thioredoxin-related transmembrane protein 1                      | Tmx1     | 31.44  | 2166.8906 | 6  |
| Q5BJZ3_RAT | Q5BJZ3 | Nicotinamide nucleotide transhydrogenase                         | Nnt      | 113.87 | 429.1828  | 18 |

|            |        |                                                                                   |          |        |            |    |
|------------|--------|-----------------------------------------------------------------------------------|----------|--------|------------|----|
| Q5EAP4_RAT | Q5EAP4 | Guanine nucleotide binding protein alpha-14                                       | Gna14    | 41.44  | 3949.9775  | 14 |
| Q5FVC4_RAT | Q5FVC4 | DnaJ (Hsp40) homolog subfamily B member 12                                        | Dnajb12  | 42.52  | 1014.84045 | 9  |
| Q5M7T6_RAT | Q5M7T6 | V-type proton ATPase subunit D 1                                                  | Atp6v0d1 | 40.30  | 9359.584   | 17 |
| Q5RK10_RAT | Q5RK10 | 60S ribosomal protein L13a, isoform                                               | Rpl13a   | 23.45  | 2532.1545  | 9  |
| Q5RKJ9_RAT | Q5RKJ9 | Ras-related protein Rab-10                                                        | Rab10    | 22.54  | 28772.68   | 7  |
| Q5U1Y2_RAT | Q5U1Y2 | Ras-related C3 botulinum toxin substrate 2 (Rac2)                                 | Rac2     | 21.44  | 26561.215  | 9  |
| Q5U1Z9_RAT | Q5U1Z9 | Metaxin 2                                                                         | Mtx2     | 29.72  | 2446.838   | 5  |
| Q5U2Z8_RAT | Q5U2Z8 | Elongation of very long chain fatty acids protein 1                               | Elovl1   | 32.64  | 784.149    | 1  |
| Q5U3Z7_RAT | Q5U3Z7 | Serine hydroxymethyltransferase                                                   | Shmt2    | 55.77  | 639.08356  | 9  |
| Q5VLR5_RAT | Q5VLR5 | Endoplasmic reticulum resident protein 44                                         | Erp44    | 46.88  | 4631.925   | 11 |
| Q5XI04_RAT | Q5XI04 | Erythrocyte band 7 integral membrane protein                                      | Stom     | 31.38  | 1374.209   | 8  |
| Q5XI34_RAT | Q5XI34 | Serine/threonine-protein phosphatase 2A 65 kDa regulatory subunit A alpha isoform | Ppp2r1a  | 65.32  | 853.00256  | 14 |
| Q5XI36_RAT | Q5XI36 | CD97                                                                              | Adgre5   | 91.14  | 990.31195  | 11 |
| Q5XI86_RAT | Q5XI86 | Peptidyl-tRNA hydrolase 2                                                         | Pthr2    | 19.53  | 16233.149  | 10 |
| Q5XIH3_RAT | Q5XIH3 | NADH dehydrogenase [ubiquinone] flavoprotein 1                                    | Ndufv1   | 50.73  | 1457.5854  | 10 |
| Q5XIP2_RAT | Q5XIP2 | GPI-anchor transamidase                                                           | Pigk     | 44.89  | 2760.516   | 12 |
| Q5XIU4_RAT | Q5XIU4 | B-cell receptor-associated protein 29                                             | Bcap29   | 28.23  | 662.509    | 4  |
| Q63116_RAT | Q63116 | Mast/stem cell growth factor receptor                                             | Kit      | 109.34 | 1779.2214  | 24 |
| Q63483_RAT | Q63483 | Ras-related protein Rab-38                                                        | Rab38    | 23.78  | 4574.048   | 6  |
| Q642E3_RAT | Q642E3 | CDK5 regulatory subunit-associated protein 3, isoform                             | Cdk5rap3 | 57.14  | 4572.61    | 16 |
| Q66H18_RAT | Q66H18 | Synaptophysin-like 1                                                              | Sypl1    | 28.63  | 3762.5981  | 5  |
| Q6AXX5_RAT | Q6AXX5 | Retinol dehydrogenase 11                                                          | Rdh11    | 35.12  | 1461.48    | 6  |
| Q6AY18_RAT | Q6AY18 | GTP-binding protein SAR1a                                                         | Sar1a    | 22.40  | 1340.813   | 4  |
| Q6AYD3_RAT | Q6AYD3 | Proliferation-associated protein 2G4                                              | Pa2g4    | 43.66  | 899.6481   | 10 |
| Q6AYI1_RAT | Q6AYI1 | Probable ATP-dependent RNA helicase DDX5                                          | Ddx5     | 69.24  | 1868.138   | 13 |
| Q6AYM8_RAT | Q6AYM8 | Glycosylphosphatidylinositol anchor attachment 1                                  | Gpaa1    | 67.97  | 564.3983   | 7  |
| Q6AYQ9_RAT | Q6AYQ9 | Peptidyl-prolyl cis-trans isomerase C                                             | Ppic     | 23.01  | 3430.5244  | 7  |
| Q6IFU9_RAT | Q6IFU9 | keratin 16                                                                        | Krt16    | 50.78  | 773.24097  | 7  |
| Q6IFV6_RAT | Q6IFV6 | Keratin 35                                                                        | Krt35    | 50.68  | 1185.366   | 5  |
| Q6IFZ5_RAT | Q6IFZ5 | Keratin, type II cytoskeletal 2 oral                                              | Krt76    | 61.76  | 711.88745  | 12 |
| Q6IN24_RAT | Q6IN24 | Galectin-8                                                                        | Lgals8   | 36.07  | 1860.6     | 10 |
| Q6IRF8_RAT | Q6IRF8 | V-type proton ATPase subunit S1                                                   | Atp6ap1  | 51.10  | 1346.6022  | 5  |
| Q6MGA3_RAT | Q6MGA3 | Antigen peptide transporter 2                                                     | Tap2     | 77.75  | 14208.09   | 22 |
| Q6MGB4_RAT | Q6MGB4 | H2-K region expressed gene 4, rat orthologue                                      | Slc39a7  | 49.50  | 511.51898  | 4  |
| Q6P3V8_RAT | Q6P3V8 | Eukaryotic initiation factor 4A-I                                                 | Eif4a1   | 46.15  | 1732.11    | 8  |
| Q6P3V9_RAT | Q6P3V9 | 60S ribosomal protein L4                                                          | Rpl4     | 47.30  | 2003.3816  | 18 |
| Q6P503_RAT | Q6P503 | V-type proton ATPase subunit D                                                    | Atp6v1d  | 28.31  | 1400.0286  | 7  |
| Q6P685_RAT | Q6P685 | Eukaryotic translation initiation factor 2 subunit 2                              | Eif2s2   | 38.24  | 336.0998   | 8  |

|            |        |                                                   |              |       |           |    |
|------------|--------|---------------------------------------------------|--------------|-------|-----------|----|
| Q6P9V1_RAT | Q6P9V1 | CD81 molecule                                     | Cd81         | 25.91 | 3985.6934 | 4  |
| Q6PCU4_RAT | Q6PCU4 | Emerin                                            | Emd          | 29.59 | 2569.4375 | 12 |
| Q6PDV6_RAT | Q6PDV6 | 40S ribosomal protein S14                         | LOC100911847 | 16.27 | 2446.334  | 3  |
| Q76GL9_RAT | Q76GL9 | Neutral amino acid transporter A                  | Slc1a4       | 55.90 | 2930.5596 | 7  |
| Q78P65_RAT | Q78P65 | Rap2A-like protein                                | Rap2a        | 11.95 | 26551.25  | 6  |
| Q7TP42_RAT | Q7TP42 | Translocation protein SEC62                       | Sec62        | 67.93 | 1620.406  | 8  |
| Q7TQ86_RAT | Q7TQ86 | Ac1158                                            | Rsl1d1       | 60.96 | 802.25543 | 6  |
| Q8SEZ5_RAT | Q8SEZ5 | Cytochrome c oxidase subunit 2                    | Mt-co2       | 25.93 | 5020.634  | 4  |
| Q99JC6_RAT | Q99JC6 | Tapasin                                           | Tapbp        | 50.05 | 7855.967  | 11 |
| Q9Z1J7_RAT | Q9Z1J7 | Amino acid transporter                            | Slc1a5       | 56.76 | 1423.9875 | 6  |
| QCR1_RAT   | Q68FY0 | Cytochrome b-c1 complex subunit 1 mitochondrial   | Uqcrc1       | 52.85 | 8080.3516 | 15 |
| QCR2_RAT   | P32551 | Cytochrome b-c1 complex subunit 2 mitochondrial   | Uqcrc2       | 48.40 | 7736.858  | 15 |
| QCR6_RAT   | Q5M9I5 | Cytochrome b-c1 complex subunit 6 mitochondrial   | Uqcrh        | 10.42 | 13177.475 | 4  |
| R9PXR4_RAT | R9PXR4 | Mitochondrial import receptor subunit TOM70       | Tomm70       | 61.94 | 6584.302  | 21 |
| RAB14_RAT  | P61107 | Ras-related protein Rab-14                        | Rab14        | 23.93 | 40040.32  | 16 |
| RAB15_RAT  | P35289 | Ras-related protein Rab-15                        | Rab15        | 24.28 | 16062.471 | 5  |
| RAB18_RAT  | Q5EB77 | Ras-related protein Rab-18                        | Rab18        | 22.98 | 5795.3335 | 11 |
| RAB1A_RAT  | Q6NYB7 | Ras-related protein Rab-1a                        | Rab1A        | 22.68 | 65807.23  | 13 |
| RAB21_RAT  | Q6AXT5 | Ras-related protein Rab-21                        | Rab21        | 24.16 | 4898.142  | 9  |
| RAB2A_RAT  | P05712 | Ras-related protein Rab-2a                        | Rab2a        | 23.54 | 30861.914 | 15 |
| RAB35_RAT  | Q5U316 | Ras-related protein Rab-35                        | Rab35        | 23.03 | 9651.083  | 9  |
| RAB3A_RAT  | P63012 | Ras-related protein Rab-3a                        | Rab3a        | 24.97 | 4949.498  | 5  |
| RAB3D_RAT  | Q63942 | Ras-related protein Rab-3d                        | Rab3d        | 24.29 | 5246.023  | 7  |
| RAB43_RAT  | Q53B90 | Ras-related protein Rab-43                        | Rab43        | 23.23 | 4229.5757 | 6  |
| RAB4B_RAT  | P51146 | Ras-related protein Rab-4b                        | Rab4b        | 23.63 | 8660.258  | 10 |
| RAB6A_RAT  | Q9WVB1 | Ras-related protein Rab-6a                        | Rab6a        | 23.59 | 15014.664 | 10 |
| RAB7A_RAT  | P09527 | Ras-related protein Rab-7a                        | Rab7a        | 23.50 | 49333.57  | 17 |
| RAB8A_RAT  | P35280 | Ras-related protein Rab-8a                        | Rab8a        | 23.67 | 25169.18  | 13 |
| RAB8B_RAT  | P70550 | Ras-related protein Rab-8b                        | Rab8b        | 23.60 | 26870.184 | 10 |
| RAB9A_RAT  | Q99P75 | Ras-related protein Rab-9a                        | Rab9a        | 22.90 | 1927.4304 | 7  |
| RAC1_RAT   | Q6RUV5 | Ras-related C3 botulinum toxin substrate 1 (Rac1) | Rac1         | 21.45 | 12083.035 | 8  |
| RALA_RAT   | P63322 | Ras-related protein Ral-A                         | Rala         | 23.55 | 13274.745 | 8  |
| RAP1A_RAT  | P62836 | Ras-related protein Rap-1a                        | Rap1a        | 20.99 | 29839.578 | 13 |
| RAP1B_RAT  | Q62636 | Ras-related protein Rap-1b                        | Rap1b        | 20.80 | 61852.535 | 16 |
| RAP2B_RAT  | P61227 | Ras-related protein Rap-2b                        | Rap2b        | 20.50 | 33133.664 | 11 |
| RASH_RAT   | P20171 | GTPase HRas                                       | Hras         | 21.30 | 7927.7456 | 9  |
| RASK_RAT   | P08644 | GTPase KRas                                       | Kras         | 21.66 | 9070.234  | 12 |
| RASN_RAT   | Q04970 | GTPase NRas                                       | Nras         | 21.24 | 10836.549 | 12 |



|           |        |                                                                         |         |       |           |    |
|-----------|--------|-------------------------------------------------------------------------|---------|-------|-----------|----|
| RB11B_RAT | O35509 | Ras-related protein Rab-11b                                             | Rab11b  | 24.49 | 20963.8   | 13 |
| RB27A_RAT | P23640 | Ras-related protein Rab-27a                                             | Rab27a  | 25.07 | 19213.395 | 12 |
| RB27B_RAT | Q99P74 | Ras-related protein Rab-27b                                             | Rab27b  | 24.62 | 18974.406 | 14 |
| REN_RAT   | Q6AXS4 | Renin receptor                                                          | Atp6ap2 | 39.08 | 1127.7795 | 9  |
| RER1_RAT  | Q498C8 | Protein RER1                                                            | Rer1    | 22.99 | 3561.753  | 6  |
| RGS19_RAT | O70521 | Regulator of G-protein signaling 19                                     | Rgs19   | 24.74 | 4484.95   | 7  |
| RHBL4_RAT | Q4V8F3 | Rhomboid-related protein 4                                              | Rhbdd1  | 35.88 | 757.19183 | 4  |
| RHOA_RAT  | P61589 | Transforming protein RhoA                                               | Rhoa    | 21.78 | 47836.855 | 12 |
| RHOB_RAT  | P62747 | Rho-related GTP-binding protein RhoB                                    | Rhob    | 22.12 | 20034.904 | 6  |
| RL10_RAT  | Q6PDV7 | 60S ribosomal protein L10                                               | Rpl10   | 24.60 | 3478.3306 | 8  |
| RL10A_RAT | P62907 | 60S ribosomal protein L10a                                              | Rpl10a  | 24.83 | 3409.09   | 6  |
| RL11_RAT  | P62914 | 60S ribosomal protein L11                                               | Rpl11   | 20.25 | 3160.7769 | 4  |
| RL12_RAT  | P23358 | 60S ribosomal protein L12                                               | Rpl12   | 17.85 | 8159.423  | 6  |
| RL13A_RAT | P35427 | 60S ribosomal protein L13a                                              | Rpl13a  | 23.48 | 2532.1545 | 9  |
| RL14_RAT  | Q63507 | 60S ribosomal protein L14                                               | Rpl14   | 23.34 | 4102.905  | 4  |
| RL17_RAT  | P24049 | 60S ribosomal protein L17                                               | Rpl17   | 21.40 | 1644.8086 | 3  |
| RL18_RAT  | P12001 | 60S ribosomal protein L18                                               | Rpl18   | 21.66 | 5652.0596 | 5  |
| RL18A_RAT | P62718 | 60S ribosomal protein L18a                                              | Rpl18a  | 20.73 | 3227.7095 | 7  |
| RL19_RAT  | P84100 | 60S ribosomal protein L19                                               | Rpl19   | 23.47 | 4241.6533 | 4  |
| RL23_RAT  | P62832 | 60S ribosomal protein L23                                               | Rpl23   | 14.87 | 3088.36   | 4  |
| RL24_RAT  | P83732 | 60S ribosomal protein L24                                               | Rpl24   | 17.78 | 1627.648  | 2  |
| RL3_RAT   | P21531 | 60S ribosomal protein L3                                                | Rpl3    | 46.14 | 1587.5591 | 13 |
| RL30_RAT  | P62890 | 60S ribosomal protein L30                                               | Rpl30   | 12.78 | 11503.277 | 5  |
| RL40_RAT  | P62986 | Ubiquitin-60S ribosomal protein L40                                     | Uba52   | 14.73 | 35746.945 | 6  |
| RL7_RAT   | P05426 | 60S ribosomal protein L7                                                | Rpl7    | 30.33 | 5262.581  | 9  |
| RLA0_RAT  | P19945 | 60S acidic ribosomal protein P0                                         | Rplp0   | 34.22 | 7699.7544 | 9  |
| RLA1_RAT  | P19944 | 60S acidic ribosomal protein P1                                         | Rplp1   | 11.50 | 55449.68  | 2  |
| RMD3_RAT  | Q66H15 | Regulator of microtubule dynamics protein 3                             | Rmdn3   | 52.31 | 2174.5369 | 8  |
| RPN2_RAT  | P25235 | Dolichyl-diphosphooligosaccharide protein glycosyltransferase subunit 2 | Rpn2    | 69.08 | 42825.945 | 25 |
| RRAGA_RAT | Q63486 | Ras-related GTP-binding protein A (Rag A)                               | Rraga   | 36.57 | 1977.4419 | 7  |
| RS11_RAT  | P62282 | 40S ribosomal protein S11                                               | Rps11   | 18.43 | 2837.272  | 6  |
| RS13_RAT  | P62278 | 40S ribosomal protein S13                                               | Rps13   | 17.22 | 6866.343  | 7  |
| RS15A_RAT | P62246 | 40S ribosomal protein S15a                                              | Rps15a  | 14.84 | 1937.288  | 5  |
| RS16_RAT  | P62250 | 40S ribosomal protein S16                                               | Rps16   | 16.45 | 3674.629  | 7  |
| RS27A_RAT | P62982 | Ubiquitin-40S ribosomal protein S27a                                    | Rps27a  | 17.95 | 37445.46  | 8  |
| RS28_RAT  | P62859 | 40S ribosomal protein S28                                               | Rps28   | 7.84  | 3012.5073 | 2  |
| RS3_RAT   | P62909 | 40S ribosomal protein S3                                                | Rps3    | 26.67 | 4638.574  | 12 |
| RS3A_RAT  | P49242 | 40S ribosomal protein S3a                                               | Rps3a   | 29.95 | 3326.7974 | 12 |

|           |        |                                                                   |         |        |           |    |
|-----------|--------|-------------------------------------------------------------------|---------|--------|-----------|----|
| RS4X_RAT  | P62703 | 40S ribosomal protein S4, X isoform                               | Rps4x   | 29.60  | 1144.8865 | 10 |
| RS7_RAT   | P62083 | 40S ribosomal protein S7                                          | Rps7    | 22.13  | 3930.561  | 5  |
| RS8_RAT   | P62243 | 40S ribosomal protein S8                                          | Rps8    | 24.21  | 8867.166  | 10 |
| RSSA_RAT  | P38983 | 40S ribosomal protein SA                                          | Rpsa    | 32.82  | 2309.031  | 7  |
| RTN4_RAT  | Q9JK11 | Reticulon-4                                                       | Rtn4    | 126.39 | 1037.768  | 14 |
| S38A2_RAT | Q9JHE5 | Sodium-coupled neutral amino acid transporter 2                   | Slc38a2 | 55.55  | 4436.6104 | 5  |
| S61A1_RAT | P61621 | SEC61 alpha-1                                                     | Sec61a1 | 52.27  | 5403.4395 | 9  |
| SAC1_RAT  | Q9ES21 | Phosphatidylinositide phosphatase SAC1                            | Sacm1l  | 67.04  | 1569.263  | 19 |
| SAM50_RAT | Q6AXV4 | Sorting and assembly machinery component 50 homolog               | Samm50  | 51.96  | 1186.929  | 14 |
| SAP_RAT   | P10960 | Prosaposin                                                        | Psap    | 61.12  | 276.0468  | 9  |
| SARAF_RAT | Q6AYN2 | Store-operated calcium entry-associated regulatory factor (SARAF) | Saraf   | 35.89  | 972.8738  | 4  |
| SC11A_RAT | P42667 | SEC11 homolog A                                                   | Sec11a  | 20.60  | 12103.855 | 10 |
| SC11C_RAT | Q9WTR7 | SEC11 homolog C                                                   | Sec11c  | 21.65  | 4794.677  | 6  |
| SC22B_RAT | Q4KM74 | Vesicle-trafficking protein SEC22b                                | Sec22b  | 24.74  | 34632.867 | 14 |
| SCFD1_RAT | Q62991 | Syntaxin-binding protein 1-like 2                                 | Scfd1   | 72.26  | 1780.61   | 11 |
| SCRB2_RAT | P27615 | Lysosome membrane protein 2 (CD36)                                | Scarb2  | 54.09  | 2124.119  | 9  |
| SELT_RAT  | Q1H5H1 | Thioredoxin reductase-like selenoprotein T                        | Selenot | 22.29  | 4981.218  | 5  |
| SFXN1_RAT | Q63965 | Sideroflexin-1                                                    | Sfxn1   | 35.55  | 12449.84  | 10 |
| SGPL1_RAT | Q8CHN6 | Sphingosine-1-phosphate lyase 1                                   | Sgpl1   | 63.76  | 1971.3015 | 8  |
| SIA4C_RAT | P61131 | Beta-galactoside alpha-2,3-sialyltransferase 4                    | St3gal4 | 38.04  | 1940.3485 | 11 |
| SNAA_RAT  | P54921 | Alpha-soluble NSF attachment protein (SNAP-alpha)                 | Napa    | 33.19  | 20788.06  | 18 |
| SND1_RAT  | Q66X93 | Staphylococcal nuclease domain-containing protein 1               | Snd1    | 101.95 | 557.89636 | 20 |
| SNG1_RAT  | Q62876 | Synaptogyrin-1                                                    | Syngr1  | 25.67  | 1934.197  | 2  |
| SNG2_RAT  | O54980 | Synaptogyrin-2                                                    | Syngr2  | 24.71  | 1547.865  | 2  |
| SNP23_RAT | O70377 | Synaptosomal-associated protein 23 (SNAP-23)                      | Snap23  | 23.24  | 44422.52  | 12 |
| SO4A1_RAT | Q99N01 | Organic anion-transporting polypeptide E                          | Slco4a1 | 77.63  | 725.4213  | 10 |
| SPNS1_RAT | Q2YDU8 | Protein spinster homolog 1                                        | Spns1   | 56.80  | 857.2124  | 5  |
| SQSTM_RAT | O08623 | Sequestosome-1                                                    | Sqstm1  | 47.68  | 660.8219  | 7  |
| SRPRB_RAT | Q4FZX7 | Signal recognition particle receptor beta                         | Srprb   | 29.57  | 5558.2905 | 13 |
| SSRD_RAT  | Q07984 | Translocon-associated protein subunit delta                       | Ssr4    | 18.98  | 36080.1   | 8  |
| STIM1_RAT | P84903 | Stromal interaction molecule 1 (STIM1)                            | Stim1   | 77.45  | 3978.3716 | 21 |
| STML2_RAT | Q4FZT0 | Stomatin-like protein 2                                           | Stoml2  | 38.41  | 4983.7925 | 13 |
| STRN3_RAT | P58405 | Striatin-3                                                        | Strn3   | 87.11  | 330.0479  | 8  |
| STX12_RAT | G3V7P1 | Syntaxin-12                                                       | Stx12   | 31.19  | 24137.426 | 11 |
| STX3_RAT  | Q08849 | Syntaxin-3                                                        | Stx3    | 33.26  | 3255.2964 | 8  |
| STX5_RAT  | Q08851 | Syntaxin-5                                                        | Stx5    | 39.75  | 1804.198  | 10 |
| STX6_RAT  | Q63635 | Syntaxin-6                                                        | Stx6    | 29.06  | 1157.439  | 6  |
| STX7_RAT  | O70257 | Syntaxin-7                                                        | Stx7    | 29.85  | 13255.42  | 9  |

|           |        |                                                            |          |        |           |    |
|-----------|--------|------------------------------------------------------------|----------|--------|-----------|----|
| STX8_RAT  | Q9Z2Q7 | Syntaxin-8                                                 | Stx8     | 26.91  | 2008.0415 | 6  |
| STXB2_RAT | Q62753 | Syntaxin-binding protein 2                                 | Stxbp2   | 66.70  | 3765.574  | 24 |
| STXB5_RAT | Q9WU70 | Syntaxin-binding protein 5                                 | Stxbp5   | 127.66 | 825.01843 | 14 |
| SYVC_RAT  | Q04462 | Valine--tRNA ligase                                        | Vars     | 140.37 | 315.0938  | 21 |
| T106B_RAT | Q6AYA5 | Transmembrane protein 106 B                                | Tmem106b | 31.15  | 766.6193  | 5  |
| T120A_RAT | Q5HZE2 | Transmembrane protein 120 A                                | Tmem120a | 40.66  | 2023.4355 | 8  |
| TAP1_RAT  | P36370 | Antigen peptide transporter 1                              | Tap1     | 79.15  | 7183.5654 | 22 |
| TAXB1_RAT | Q66HA4 | Tax1-binding protein 1 homolog                             | Tax1bp1  | 93.20  | 1382.8915 | 20 |
| TBA1B_RAT | Q6P9V9 | Tubulin alpha-1B                                           | Tuba1b   | 50.15  | 21971.31  | 18 |
| TBA1C_RAT | Q6AYZ1 | Tubulin alpha-1C                                           | Tuba1c   | 49.94  | 19631.385 | 17 |
| TBA4A_RAT | Q5XIF6 | Tubulin alpha-4A                                           | Tuba4a   | 49.92  | 9072.143  | 16 |
| TBA8_RAT  | Q6AY56 | Tubulin alpha-8                                            | Tuba8    | 50.04  | 5823.075  | 14 |
| TBB4B_RAT | Q6P9T8 | Tubulin beta-4B                                            | Tubb4b   | 49.80  | 825.013   | 6  |
| TBB5_RAT  | P69897 | Tubulin beta-5                                             | Tubb5    | 49.67  | 10868.01  | 17 |
| TCPB_RAT  | Q5XIM9 | T-complex protein 1 beta                                   | Cct2     | 57.46  | 490.99457 | 8  |
| TCPE_RAT  | Q68FQ0 | T-complex protein 1 epsilon                                | Cct5     | 59.54  | 848.6412  | 9  |
| TECR_RAT  | Q64232 | Very-long-chain enoyl-CoA reductase                        | Tecr     | 36.12  | 2042.097  | 13 |
| TERA_RAT  | P46462 | Transitional endoplasmic reticulum ATPase                  | Vcp      | 89.35  | 9863.038  | 37 |
| TGON3_RAT | P19814 | Trans-Golgi network integral membrane protein TGN38        | Ttgn1    | 38.31  | 1215.6049 | 6  |
| THY1_RAT  | P01830 | Thy-1 membrane glycoprotein                                | Thy1     | 18.17  | 46873.016 | 8  |
| TKT_RAT   | P50137 | Transketolase                                              | Tkt      | 67.64  | 1239.818  | 14 |
| TM109_RAT | Q6AYQ4 | Transmembrane protein 109                                  | Tmem109  | 26.24  | 851.1362  | 1  |
| TM165_RAT | Q4V899 | Transmembrane protein 165                                  | Tmem165  | 34.81  | 17560.244 | 6  |
| TM168_RAT | Q5PQM0 | Transmembrane protein 168                                  | Tmem168  | 79.77  | 3365.133  | 12 |
| TM38B_RAT | Q68FV1 | Trimeric intracellular cation channel type B (TRIC-B)      | Tmem38b  | 32.45  | 2604.358  | 6  |
| TM55A_RAT | Q4V888 | Type 2 phosphatidylinositol 4,5-bisphosphate 4-phosphatase | Pip4p2   | 28.02  | 5976.5205 | 8  |
| TM7S3_RAT | Q5FVF4 | Transmembrane 7 superfamily member 3                       | Tm7sf3   | 63.59  | 1565.8905 | 6  |
| TM9S1_RAT | Q66HF2 | Transmembrane 9 superfamily member 1                       | Tm9sf1   | 66.92  | 840.3792  | 14 |
| TM9S2_RAT | Q66HG5 | Transmembrane 9 superfamily member 2                       | Tm9sf2   | 75.59  | 5912.821  | 13 |
| TM9S4_RAT | Q4KLL4 | Transmembrane 9 superfamily member 4                       | Tm9sf4   | 74.68  | 4822.549  | 19 |
| TMCO1_RAT | Q5I0H4 | Calcium load-activated calcium channel (CLAC channel)      | Tmco1    | 21.18  | 2068.694  | 3  |
| TMED1_RAT | Q5BK85 | Transmembrane emp24 domain-containing protein 1            | Tmed1    | 25.21  | 1818.857  | 5  |
| TMED2_RAT | Q63524 | Transmembrane emp24 domain-containing protein 2            | Tmed2    | 22.73  | 10404.914 | 7  |
| TMED5_RAT | Q6AXN3 | Transmembrane emp24 domain-containing protein 5            | Tmed5    | 26.14  | 4953.7896 | 8  |
| TMED7_RAT | D3ZTX0 | Transmembrane emp24 domain-containing protein 7            | Tmed7    | 25.48  | 13459.775 | 9  |
| TMED9_RAT | Q5I0E7 | Transmembrane emp24 domain-containing protein 9            | Tmed9    | 27.03  | 23465.781 | 9  |
| TMEDA_RAT | Q63584 | Transmembrane emp24 domain-containing protein 10           | Tmed10   | 24.86  | 35308.4   | 12 |
| TMM43_RAT | Q5XIP9 | Transmembrane protein 43 (Protein LUMA)                    | Tmem43   | 44.77  | 969.2106  | 9  |

|           |        |                                                                          |          |        |           |    |
|-----------|--------|--------------------------------------------------------------------------|----------|--------|-----------|----|
| TMX2_RAT  | Q5XIK2 | Thioredoxin-related transmembrane protein 2                              | Tmx2     | 33.87  | 2550.555  | 7  |
| TOIP1_RAT | Q5PQX1 | Torsin-1A-interacting protein 1                                          | Tor1aip1 | 65.65  | 2439.1387 | 13 |
| TOM22_RAT | Q75Q41 | Mitochondrial import receptor subunit TOM22 homolog                      | Tomm22   | 15.49  | 5316.167  | 5  |
| TPM3_RAT  | Q63610 | Tropomyosin alpha-3                                                      | Tpm3     | 29.01  | 158.7291  | 3  |
| TPM4_RAT  | P09495 | Tropomyosin alpha-4                                                      | Tpm4     | 28.51  | 372.3383  | 7  |
| TRAM1_RAT | Q5XI41 | Translocating chain-associated membrane protein 1                        | Tram1    | 43.03  | 493.56726 | 3  |
| TRPV2_RAT | Q9WUD2 | Transient receptor potential cation channel subfamily V member 2 (TRPV2) | Trpv2    | 86.71  | 2500.0945 | 16 |
| TRY1_RAT  | P00762 | Anionic trypsin-1                                                        | Prss1    | 25.96  | 2475.5454 | 1  |
| TXTP_RAT  | P32089 | Citrate transport protein                                                | Slc25a1  | 33.84  | 951.4356  | 7  |
| UBXN4_RAT | Q5HZY0 | Erasin                                                                   | Ubxn4    | 56.39  | 1303.3049 | 8  |
| UCRI_RAT  | P20788 | Cytochrome b-c1 complex subunit Rieske                                   | Uqcrfs1  | 29.45  | 3786.0586 | 7  |
| UFL1_RAT  | B2GV24 | E3 UFM1-protein ligase 1                                                 | Ufl1     | 89.59  | 2064.419  | 22 |
| VAMP3_RAT | P63025 | VAMP3                                                                    | Vamp3    | 11.48  | 23798.4   | 6  |
| VAMP5_RAT | Q9Z2J5 | VAMP5                                                                    | Vamp5    | 11.50  | 7016.9023 | 2  |
| VAMP7_RAT | Q9JHW5 | VAMP7                                                                    | Vamp7    | 24.78  | 1283.94   | 6  |
| VAPA_RAT  | Q9Z270 | VAMP-associated protein A                                                | Vapa     | 27.84  | 20269     | 12 |
| VAPB_RAT  | Q9Z269 | VAMP-associated protein B                                                | Vapb     | 26.92  | 19280.703 | 9  |
| VATB2_RAT | P62815 | V-type proton ATPase subunit B                                           | Atp6v1b2 | 56.55  | 5370.288  | 20 |
| VATE1_RAT | Q6PCU2 | V-type proton ATPase subunit E 1                                         | Atp6v1e1 | 26.13  | 3807.996  | 7  |
| VATF_RAT  | P50408 | V-type proton ATPase subunit F                                           | Atp6v1f  | 13.37  | 5433.4697 | 6  |
| VDAC1_RAT | Q9Z2L0 | Voltage-dependent anion-selective channel protein 1                      | Vdac1    | 30.76  | 31697.959 | 16 |
| VDAC2_RAT | P81155 | Voltage-dependent anion-selective channel protein 2                      | Vdac2    | 31.75  | 30921.11  | 15 |
| VDAC3_RAT | Q9R1Z0 | Voltage-dependent anion-selective channel protein 3                      | Vdac3    | 30.80  | 21432.629 | 16 |
| VEZA_RAT  | Q5XI52 | Vezatin                                                                  | Vezt     | 88.69  | 599.8607  | 7  |
| VGFR2_RAT | O08775 | Vascular endothelial growth factor receptor 2                            | Kdr      | 150.39 | 151.32126 | 2  |
| VKOR1_RAT | Q6TEK4 | Vitamin K epoxide reductase complex subunit 1                            | Vkorc1   | 17.78  | 3224.8171 | 1  |
| VMAT2_RAT | Q01827 | Vesicular amine transporter 2                                            | Slc18a2  | 55.69  | 1077.7045 | 3  |
| VMP1_RAT  | Q91ZQ0 | Vacuole membrane protein 1                                               | Vmp1     | 45.90  | 1842.7786 | 2  |
| VWA5A_RAT | Q75WE7 | Von Willebrand factor A domain-containing protein 5A                     | Vwa5a    | 91.48  | 857.0407  | 12 |
| YES_RAT   | F1LM93 | Tyrosine-protein kinase Yes                                              | Yes1     | 60.61  | 13521.72  | 22 |
| YIF1B_RAT | Q6PEC3 | Protein YIF1B                                                            | Yif1b    | 28.42  | 2773.6765 | 2  |
| YIPF4_RAT | Q5M7T4 | Protein YIPF4                                                            | Yipf4    | 27.28  | 1942.5706 | 2  |
| YIPF5_RAT | Q5XID0 | Protein YIPF5                                                            | Yipf5    | 27.90  | 1374.8135 | 2  |
| YMEL1_RAT | Q925S8 | ATP-dependent zinc metalloprotease YME1L1                                | Yme1l1   | 79.87  | 1352.321  | 18 |
| ZNT1_RAT  | Q62720 | Zinc transporter 1                                                       | Slc30a1  | 55.14  | 290.3024  | 4  |
| ZW10_RAT  | Q4V8C2 | Centromere/kinetochore protein zw10 homolog                              | Zw10     | 87.97  | 548.4421  | 16 |

| Header line description of worksheets |                                                                          |
|---------------------------------------|--------------------------------------------------------------------------|
| Method                                | Protein identification with which Method                                 |
| Protein ID                            | Protein identification of UniProt                                        |
| Protein accession                     | Protein accession number of UniProt                                      |
| Protein description                   | Protein functional description                                           |
| Gene name                             | Indicates the name of the gene that code for the protein sequence        |
| MW [kDa]                              | Protein molecular weight ,unit [kDa]                                     |
| Score AVG                             | A simple rule to be used to judge whether a result is significant or not |
| Peptides AVG                          | Number of peptides whitch spectrum hit                                   |
