# Supplementary material for: Proteomic Analysis of Lipid Rafts from RBL-2H3 Mast Cells
Source: MDPI journal article supplement (doi:10.3390/ijms20163904), 2019-08-11
Supplement: s1 [file s1]

**Supplementary Table 3. Detailed annotation of proteins identified in Methods I and II**

| Method        | Protein ID | Protein accession | Protein description                                            | Gene name |
|---------------|------------|-------------------|----------------------------------------------------------------|-----------|
| Met I; Met II | 1433B_RAT  | P35213            | 14-3-3 protein beta/alpha                                      | Ywhab     |
| Met I; Met II | 1433E_RAT  | P62260            | 14-3-3 protein epsilon                                         | Ywhae     |
| Met I; Met II | 1433F_RAT  | P68511            | 14-3-3 protein eta                                             | Ywhah     |
| Met I; Met II | 1433G_RAT  | P61983            | 14-3-3 protein gamma                                           | Ywhag     |
| Met I; Met II | 1433T_RAT  | P68255            | 14-3-3 protein theta                                           | Ywhaq     |
| Met I; Met II | 1433Z_RAT  | P63102            | 14-3-3 protein zeta/delta                                      | Ywhaz     |
| Met I; Met II | 4F2_RAT    | Q794F9            | 4F2 cell-surface antigen heavy chain                           | Slc3a2    |
| Met I         | 6PGD_RAT   | P85968            | 6-phosphogluconate dehydrogenase decarboxylating               | Pgd       |
| Met I         | 6PGL_RAT   | P85971            | 6-phosphogluconolactonase                                      | Pgl       |
| Met II        | A0JN29_RAT | A0JN29            | Lunapark ER junction formation factor                          | Ln timer  |
| Met I; Met II | A0JN30_RAT | A0JN30            | Canopy 2 homolog                                               | Cnpy2     |
| Met II        | A1L1J8_RAT | A1L1J8            | Ras-related protein Rab-5b                                     | Rab5b     |
| Met II        | A1L1L6_RAT | A1L1L6            | Mitochondrial Rho GTPase 1                                     | Rhot1     |
| Met I; Met II | A3RLA8_RAT | A3RLA8            | Low affinity immunoglobulin gamma Fc region receptor II        | Fcgr2b    |
| Met I         | AATC_RAT   | P13221            | Aspartate aminotransferase cytoplasmic                         | Got1      |
| Met I; Met II | AATM_RAT   | P00507            | Aspartate aminotransferase mitochondrial                       | Got2      |
| Met II        | ABCB6_RAT  | O70595            | ATP-binding cassette sub-family B member 6                     | Abcb6     |
| Met II        | ABCB8_RAT  | Q5RKI8            | ATP-binding cassette sub-family B member 8                     | Abcb8     |
| Met I         | ABCF1_RAT  | Q6MG08            | ATP-binding cassette sub-family F member 1                     | Abcf1     |
| Met II        | ABHGA_RAT  | Q6MG55            | Abhydrolase domain containing 16A                              | Abhd16a   |
| Met I         | ACON_RAT   | Q9ER34            | Aconitate hydratase mitochondrial                              | Aco2      |
| Met II        | ACSL3_RAT  | Q63151            | Long chain fatty acid CoA ligase 3                             | Acsl3     |
| Met II        | ACSL5_RAT  | O88813            | Long chain fatty acid CoA ligase 5                             | Acsl5     |
| Met I; Met II | ACTB_RAT   | P60711            | Actin cytoplasmic 1                                            | Actb      |
| Met I         | ACTH_RAT   | P63269            | Actin gamma-enteric smooth muscle                              | Actg2     |
| Met I         | ADA_RAT    | Q920P6            | Adenosine deaminase                                            | Ada       |
| Met II        | ADA15_RAT  | Q9QYV0            | Disintegrin and metalloproteinase domain-containing protein 15 | Adam15    |
| Met I; Met II | ADT1_RAT   | Q05962            | ADP/ATP translocase 1                                          | Slc25a4   |
| Met I; Met II | ADT2_RAT   | Q09073            | ADP/ATP translocase 2                                          | Slc25a5   |
| Met II        | AIFM1_RAT  | Q9JM53            | Apoptosis-inducing factor 1                                    | Aifm1     |
| Met I         | AK1A1_RAT  | P51635            | Alcohol dehydrogenase [NADP(+)]                                | Akr1a1    |
| Met II        | AKAP1_RAT  | O88884            | A-kinase anchor protein 1, mitochondrial                       | Akap1     |
| Met II        | AL5AP_RAT  | P20291            | Arachidonate 5-lipoxygenase-activating protein                 | Alox5ap   |

|               |            |        |                                                               |         |
|---------------|------------|--------|---------------------------------------------------------------|---------|
| Met I; Met II | ALDOA_RAT  | P05065 | Fructose-bisphosphate aldolase A                              | Aldoa   |
| Met I         | ALDR_RAT   | P07943 | Aldose reductase                                              | Akr1b1  |
| Met I         | AN32B_RAT  | Q9EST6 | Acidic leucine-rich nuclear phosphoprotein 32 family member B | Anp32b  |
| Met I         | AN32E_RAT  | Q5XIE0 | Acidic leucine-rich nuclear phosphoprotein 32 family member E | Anp32e  |
| Met I; Met II | ANXA1_RAT  | P07150 | Annexin A1                                                    | Anxa1   |
| Met I         | ANXA2_RAT  | Q07936 | Annexin A2                                                    | Anxa2   |
| Met I         | ANXA5_RAT  | P14668 | Annexin A5                                                    | Anxa5   |
| Met II        | APAF_RAT   | Q9EPV5 | Apoptotic protease-activating factor 1                        | Apaf1   |
| Met I; Met II | ARL8B_RAT  | Q66HA6 | ADP-ribosylation factor-like protein 8B                       | Arl8b   |
| Met II        | ARM10_RAT  | B1WBW4 | Armadillo repeat-containing protein 10                        | Armcl10 |
| Met II        | ARMX3_RAT  | Q5XID7 | Armadillo repeat-containing X-linked protein 3                | Armclx3 |
| Met I         | ASNS_RAT   | P49088 | Glutamine-dependent asparagine synthetase                     | Asns    |
| Met I; Met II | AT1A1_RAT  | P06685 | Sodium/potassium-transporting ATPase subunit alpha-1          | Atp1a1  |
| Met I         | AT1A2_RAT  | P06686 | Sodium/potassium-transporting ATPase subunit alpha-2          | Atp1a2  |
| Met I         | AT1A3_RAT  | P06687 | Sodium/potassium-transporting ATPase subunit alpha-3          | Atp1a3  |
| Met I; Met II | AT1A4_RAT  | Q64541 | Sodium/potassium-transporting ATPase subunit alpha-4          | Atp1a4  |
| Met I; Met II | AT1B3_RAT  | Q63377 | Sodium/potassium-transporting ATPase subunit beta-3           | Atp1b3  |
| Met II        | AT2A1_RAT  | Q64578 | Sarcoplasmic/endoplasmic reticulum calcium ATPase 1 (SERCA1)  | Atp2a1  |
| Met II        | AT5F1_RAT  | P19511 | ATP synthase F(0) complex subunit B1 mitochondrial            | Atp5pb  |
| Met II        | ATAD1_RAT  | Q505J9 | ATPase family AAA domain-containing protein 1                 | Atad1   |
| Met II        | ATAD3_RAT  | Q3KRE0 | ATPase family AAA domain-containing protein 3                 | Atad3   |
| Met II        | ATP4A_RAT  | P09626 | Potassium-transporting ATPase alpha chain 1                   | Atp4a   |
| Met I; Met II | ATP5H_RAT  | P31399 | ATP synthase subunit D mitochondrial                          | Atp5pd  |
| Met I; Met II | ATP5I_RAT  | P29419 | ATP synthase subunit E mitochondrial                          | Atp5me  |
| Met I; Met II | ATP5J_RAT  | P21571 | ATP synthase-coupling factor 6 mitochondrial                  | Atp5pf  |
| Met I; Met II | ATPA_RAT   | P15999 | ATP synthase subunit alpha mitochondrial                      | Atp5f1a |
| Met I         | ATPB_RAT   | P10719 | ATP synthase subunit beta mitochondrial                       | Atp5f1b |
| Met II        | ATPG_RAT   | P35435 | ATP synthase subunit gamma mitochondrial                      | Atp5f1c |
| Met II        | ATPK_RAT   | D3ZAF6 | ATP synthase subunit F mitochondrial                          | Atp5mf  |
| Met I; Met II | ATPO_RAT   | Q06647 | ATP synthase subunit O mitochondrial                          | Atp5po  |
| Met II        | ATRAP_RAT  | Q642A2 | Type-1 angiotensin II receptor-associated protein             | Agtrap  |
| Met II        | AUP1_RAT   | A1L134 | Ancient ubiquitous protein 1                                  | Aup1    |
| Met II        | B0BN02_RAT | B0BN02 | Metaxin 1                                                     | Mtx1    |
| Met II        | B0BN30_RAT | B0BN30 | Mitochondrial carrier homolog 1                               | Mtch1   |
| Met II        | B0BN52_RAT | B0BN52 | Mitochondrial carrier homolog 2                               | Mtch2   |
| Met I; Met II | B0BN81_RAT | B0BN81 | Ribosomal protein S5                                          | Rps5    |
| Met I; Met II | B0BNG3_RAT | B0BNG3 | Vesicular integral-membrane protein VIP36                     | Lman2   |
| Met I         | B0BNJ1_RAT | B0BNJ1 | Sorcin                                                        | Sri     |

|               |            |        |                                                                   |           |
|---------------|------------|--------|-------------------------------------------------------------------|-----------|
| Met II        | B0BNK1_RAT | B0BNK1 | Ras-related protein Rab-5c                                        | Rab5c     |
| Met I         | B0K010_RAT | B0K010 | Thioredoxin domain-containing 17                                  | Txndc17   |
| Met I         | B0K031_RAT | B0K031 | 60S ribosomal protein L7, isoform                                 | Rpl7      |
| Met II        | B1WBY5_RAT | B1WBY5 | DnaJ homolog subfamily C member 11                                | Dnajc11   |
| Met II        | B1WBY7_RAT | B1WBY7 | Erlin-1                                                           | Erlin1    |
| Met II        | B1WC50_RAT | B1WC50 | RNA-binding protein EWS-like                                      | Ewsr1     |
| Met II        | B1WC61_RAT | B1WC61 | Acyl-CoA dehydrogenase family member 9                            | Acad9     |
| Met II        | B1WC67_RAT | B1WC67 | Solute carrier family 25 member 24                                | Slc25a24  |
| Met I; Met II | B2GUV5_RAT | B2GUV5 | V-type proton ATPase subunit G 1                                  | Atp6v1g1  |
| Met II        | B2GUX5_RAT | B2GUX5 | 5'-nucleotidase                                                   | Nt5c3a    |
| Met I; Met II | B2GUZ9_RAT | B2GUZ9 | Fam49b protein                                                    | Fam49b    |
| Met I         | B2GV72_RAT | B2GV72 | Carbonyl reductase 3                                              | Cbr3      |
| Met I; Met II | B2GV96_RAT | B2GV96 | Coiled-coil domain containing 115                                 | Ccdc115   |
| Met I         | B2GVB9_RAT | B2GVB9 | Fermt3 protein                                                    | Fermt3    |
| Met I; Met II | B2MG_RAT   | P07151 | Beta-2-microglobulin                                              | B2m       |
| Met I; Met II | B2RYC9_RAT | B2RYC9 | Glucosylceramidase                                                | Gba       |
| Met II        | B2RYD7_RAT | B2RYD7 | STT3B, catalytic subunit of the oligosaccharyltransferase complex | Stt3b     |
| Met II        | B2RYF6_RAT | B2RYF6 | Cleft lip and palate associated transmembrane protein 1           | Clptm1    |
| Met II        | B2RYQ2_RAT | B2RYQ2 | Serine/threonine-protein phosphatase 2A activator                 | Ptpa      |
| Met I         | B2RZ27_RAT | B2RZ27 | SH3 domain-binding glutamic acid-rich-like protein 3              | Sh3bgrl3  |
| Met II        | B2RZB3_RAT | B2RZB3 | Eva-1 homolog B                                                   | Eva1b     |
| Met I; Met II | B2RZD1_RAT | B2RZD1 | Protein transport protein Sec61 subunit beta                      | Sec61b    |
| Met II        | B3A2_RAT   | P23347 | Anion exchange protein 2                                          | Slc4a2    |
| Met II        | B4F7C2_RAT | B4F7C2 | Tubulin beta-4A                                                   | Tubb4a    |
| Met II        | B4F7C9_RAT | B4F7C9 | STT3A, catalytic subunit of the oligosaccharyltransferase complex | Stt3a     |
| Met II        | B4GN1_RAT  | Q10468 | Beta-1,4 N-acetylgalactosaminyltransferase 1                      | B4galnt1  |
| Met II        | B5DEL8_RAT | B5DEL8 | NADH dehydrogenase (Ubiquinone) iron-sulfur protein 5             | Ndufs5    |
| Met I         | B5DEN5_RAT | B5DEN5 | Eukaryotic translation elongation factor 1 beta 2                 | Eef1b2    |
| Met II        | B5DEZ3_RAT | B5DEZ3 | Coiled-coil domain containing 126                                 | Ccdc126   |
| Met II        | B5DFJ2_RAT | B5DFJ2 | Protein FAM3A                                                     | Fam3a     |
| Met II        | B6RK61_RAT | B6RK61 | Myosin heavy chain 7B                                             | Myh7b     |
| Met II        | BAF_RAT    | Q9R1T1 | Barrier-to-autointegration factor                                 | Banf1     |
| Met I         | BAG6_RAT   | Q6MG49 | Large proline-rich protein BAG6                                   | Bag6      |
| Met I; Met II | BASI_RAT   | P26453 | Basigin                                                           | Bsg       |
| Met I; Met II | BASP1_RAT  | Q05175 | Brain acid soluble protein 1                                      | Basp1     |
| Met II        | BET1_RAT   | Q62896 | Bet1 golgi vesicular membrane trafficking protein                 | Bet1      |
| Met II        | BET1L_RAT  | O35152 | BET1-like protein                                                 | Bet1l     |
| Met II        | C1GLC_RAT  | Q499P3 | C1GALT1-specific chaperone 1                                      | C1galt1c1 |

|               |           |        |                                                                     |          |
|---------------|-----------|--------|---------------------------------------------------------------------|----------|
| Met II        | C1GLT_RAT | Q9JJ05 | Glycoprotein-N-acetylgalactosamine 3-beta-galactosyltransferase 1   | C1galt1  |
| Met I; Met II | C1QBP_RAT | O35796 | Complement component 1 Q subcomponent-binding protein mitochondrial | C1qbp    |
| Met II        | CADM3_RAT | Q1WIM3 | Cell adhesion molecule 3                                            | Cadm3    |
| Met I         | CAH2_RAT  | P27139 | Carbonic anhydrase 2                                                | Ca2      |
| Met II        | CAH8_RAT  | Q5PPN4 | Carbonic anhydrase-related protein                                  | Ca8      |
| Met I         | CALM_RAT  | P0DP29 | Calmodulin-1                                                        | Calm1    |
| Met I; Met II | CALR_RAT  | P18418 | Calreticulin                                                        | Calr     |
| Met I; Met II | CALX_RAT  | P35565 | Calnexin                                                            | Canx     |
| Met I         | CAP1_RAT  | Q08163 | Adenylyl cyclase-associated protein 1                               | Cap1     |
| Met I         | CAPG_RAT  | Q6AYC4 | Macrophage-capping protein                                          | Capg     |
| Met I         | CAPZB_RAT | Q5XI32 | F-actin-capping protein subunit beta                                | Capzb    |
| Met I         | CAZA2_RAT | Q3T1K5 | F-actin-capping protein subunit alpha-2                             | Capza2   |
| Met II        | CBPA3_RAT | P21961 | Mast cell carboxypeptidase A                                        | Cpa3     |
| Met II        | CCD47_RAT | Q5U2X6 | Coiled-coil domain-containing protein 47                            | Ccdc47   |
| Met II        | CD38_RAT  | Q64244 | ADP-ribosyl cyclase/cyclic ADP-ribose hydrolase 1                   | Cd38     |
| Met I; Met II | CD48_RAT  | P10252 | CD48 antigen                                                        | Cd48     |
| Met I         | CDC37_RAT | Q63692 | Hsp90 co-chaperone Cdc37                                            | Cdc37    |
| Met I; Met II | CDC42_RAT | Q8CFN2 | Cell division control protein 42 homolog (CDC42)                    | Cdc42    |
| Met I         | CDV3_RAT  | Q5XIM5 | Protein CDV3 homolog                                                | Cdv3     |
| Met I; Met II | CH10_RAT  | P26772 | 10 kDa heat shock protein mitochondrial                             | Hspe1    |
| Met II        | CH60_RAT  | P63039 | 60 kDa heat shock protein                                           | Hspd1    |
| Met II        | CHPT1_RAT | Q66H21 | Cholinephosphotransferase 1                                         | Chpt1    |
| Met II        | CISD1_RAT | B0K020 | CDGSH iron-sulfur domain-containing protein 1                       | Cisd1    |
| Met I; Met II | CISY_RAT  | Q8VHF5 | Citrate synthase mitochondrial                                      | Cs       |
| Met II        | CK5P3_RAT | Q9JLH7 | CDK5 regulatory subunit-associated protein 3                        | Cdk5rap3 |
| Met II        | CL2DB_RAT | Q0H8B9 | C-type lectin domain family 2 member D11                            | Clec2d11 |
| Met II        | CLCN5_RAT | P51796 | Chloride intracellular channel protein 5                            | Clcn5    |
| Met I; Met II | CLH1_RAT  | P11442 | Clathrin heavy chain 1                                              | Cltc     |
| Met I         | CLIC1_RAT | Q6MG61 | Chloride intracellular channel protein 1                            | Clic1    |
| Met II        | CMA1_RAT  | P50339 | Chymase 1                                                           | Cma1     |
| Met I         | CNBP_RAT  | P62634 | Cellular nucleic acid-binding protein                               | Cnbp     |
| Met I; Met II | CNTN1_RAT | Q63198 | Contactin 1                                                         | Cntn1    |
| Met I; Met II | COF1_RAT  | P45592 | Cofilin-1                                                           | Cfl1     |
| Met II        | COMT_RAT  | P22734 | Catechol O-methyltransferase                                        | Comt     |
| Met II        | COPB_RAT  | P23514 | Coatomer subunit beta 1                                             | Copb1    |
| Met II        | COPB2_RAT | O35142 | Coatomer subunit beta 2                                             | Copb2    |
| Met II        | COPD_RAT  | Q66H80 | Coatomer subunit delta                                              | Arcn1    |
| Met II        | COPG1_RAT | Q4AEF8 | Coatomer subunit gamma 1                                            | Copg1    |

|               |            |        |                                                               |                      |
|---------------|------------|--------|---------------------------------------------------------------|----------------------|
| Met I         | COR1A_RAT  | Q91ZN1 | Coronin-1A                                                    | Coro1a               |
| Met I         | COTL1_RAT  | B0BNA5 | Coactosin-like protein                                        | Cotl1                |
| Met I; Met II | COX41_RAT  | P10888 | Cytochrome c oxidase subunit 4 isoform 1 mitochondrial        | Cox4i1               |
| Met I; Met II | COX5A_RAT  | P11240 | Cytochrome c oxidase subunit 5A mitochondrial                 | Cox5a                |
| Met I; Met II | COX5B_RAT  | P12075 | Cytochrome c oxidase subunit 5B mitochondrial                 | Cox5b                |
| Met I; Met II | CP20A_RAT  | Q6P7D4 | Cytochrome P450 20A1                                          | Cyp20a1              |
| Met II        | CP51A_RAT  | Q64654 | Lanosterol 14-alpha demethylase                               | Cyp51a1              |
| Met II        | CR1L_RAT   | Q63135 | Complement component receptor 1-like protein                  | Cr1l                 |
| Met I; Met II | CX6C2_RAT  | P11951 | Cytochrome c oxidase subunit 6C2                              | Cox6c2               |
| Met II        | CX7A2_RAT  | P35171 | Cytochrome c oxidase subunit 7A2                              | Cox7a2               |
| Met II        | CYB5B_RAT  | P04166 | Cytochrome b5 type B                                          | Cyb5b                |
| Met I         | CYBP_RAT   | Q6AYK6 | Calcyclin-binding protein                                     | Cacybp               |
| Met I         | CYC_RAT    | P62898 | Cytochrome c somatic                                          | Cycs                 |
| Met II        | D3Z9L0_RAT | D3Z9L0 | Acylglycerol kinase                                           | Agk                  |
| Met II        | D3ZAS9_RAT | D3ZAS9 | DDRGK domain containing 1                                     | Ddrgk1               |
| Met II        | D3ZAY7_RAT | D3ZAY7 | Band 4.1-like protein 2                                       | Epb41l2              |
| Met II        | D3ZCZ9_RAT | D3ZCZ9 | NADH dehydrogenase [ubiquinone] iron-sulfur protein 6         | LOC100912599         |
| Met I; Met II | D3ZD09_RAT | D3ZD09 | Cytochrome c oxidase subunit 6B1                              | Cox6b1               |
| Met II        | D3ZD11_RAT | D3ZD11 | Signal peptidase complex subunit 2                            | Spcs2                |
| Met II        | D3ZD83_RAT | D3ZD83 | Major facilitator superfamily domain-containing protein 10    | Mfsd10               |
| Met II        | D3ZDR2_RAT | D3ZDR2 | Charged multivesicular body protein 6                         | Chmp6                |
| Met II        | D3ZF11_RAT | D3ZF11 | Ragulator complex protein LAMTOR5                             | Lamtor5              |
| Met II        | D3ZF12_RAT | D3ZF12 | Signal peptidase complex subunit 3                            | Spcs3                |
| Met II        | D3ZF54_RAT | D3ZF54 | Anoctamin-10                                                  | Ano10                |
| Met II        | D3ZF97_RAT | D3ZF97 | Endoplasmic reticulum lectin 1                                | Erlec1               |
| Met II        | D3ZFK5_RAT | D3ZFK5 | Signal peptidase complex subunit 1                            | Spcs1                |
| Met II        | D3ZG43_RAT | D3ZG43 | NADH dehydrogenase (ubiquinone) iron-sulfur protein 3         | Ndufs3               |
| Met I; Met II | D3ZGM7_RAT | D3ZGM7 | Peptidase inhibitor 16                                        | Pi16                 |
| Met II        | D3ZGV2_RAT | D3ZGV2 | Peroxisomal membrane protein PEX16                            | Pex16                |
| Met II        | D3ZHA7_RAT | D3ZHA7 | Myosin light chain 6B                                         | RGD1560334_predicted |
| Met II        | D3ZIE9_RAT | D3ZIE9 | Delta-1-pyrroline-5-carboxylate synthase                      | Aldh18a1             |
| Met II        | D3ZIJ5_RAT | D3ZIJ5 | Dolichyl-phosphate mannosyltransferase subunit 3              | Dpm3                 |
| Met II        | D3ZIP8_RAT | D3ZIP8 | Endonuclease domain containing 1                              | ---                  |
| Met II        | D3ZJ32_RAT | D3ZJ32 | Extended synaptotagmin 2                                      | Esyt2                |
| Met II        | D3ZJS3_RAT | D3ZJS3 | Translocase of outer mitochondrial membrane 6                 | Tomm6                |
| Met II        | D3ZJX5_RAT | D3ZJX5 | Mitochondrial import inner membrane translocase subunit TIM50 | Timm50               |
| Met II        | D3ZK56_RAT | D3ZK56 | Ras-related protein Rap-2c                                    | Rap2c                |
| Met II        | D3ZKE6_RAT | D3ZKE6 | Sarcolemmal membrane-associated protein                       | Slmap                |

|               |            |        |                                                           |            |
|---------------|------------|--------|-----------------------------------------------------------|------------|
| Met II        | D3ZL85_RAT | D3ZL85 | Cytochrome c heme lyase                                   | Hccs       |
| Met II        | D3ZLC4_RAT | D3ZLC4 | Slc2a6 protein                                            | Slc2a6     |
| Met II        | D3ZLT7_RAT | D3ZLT7 | Uncharacterized protein KIAA2013                          | RGD1305350 |
| Met II        | D3ZM19_RAT | D3ZM19 | Protein EVI2B                                             | Evi2b      |
| Met II        | D3ZMM8_RAT | D3ZMM8 | Solute carrier family 7 member 6                          | Slc7a6     |
| Met II        | D3ZMR1_RAT | D3ZMR1 | Translocase of outer mitochondrial membrane 7             | Tomm7      |
| Met I; Met II | D3ZN21_RAT | D3ZN21 | ATP-dependent RNA helicase DDX3Y                          | Ddx3y      |
| Met II        | D3ZNG3_RAT | D3ZNG3 | Signal peptide peptidase-like 2A                          | Sppl2a     |
| Met I         | D3ZNQ6_RAT | D3ZNQ6 | NEDD8-conjugating enzyme Ubc12                            | Ube2m      |
| Met II        | D3ZNS8_RAT | D3ZNS8 | Aladin                                                    | Aaas       |
| Met II        | D3ZP13_RAT | D3ZP13 | Sulfhydryl oxidase 2                                      | Qsox2      |
| Met II        | D3ZP98_RAT | D3ZP98 | Minor histocompatibility antigen H13                      | Hm13       |
| Met I         | D3ZPP2_RAT | D3ZPP2 | ADP-ribosylation factor-like protein 8A                   | Arl8a      |
| Met I; Met II | D3ZPR0_RAT | D3ZPR0 | Exportin-2                                                | Cse1l      |
| Met II        | D3ZQG9_RAT | D3ZQG9 | RT1 class I locus CE4                                     | RT1-CE4    |
| Met I; Met II | D3ZRN3_RAT | D3ZRN3 | Beta-actin-like protein 2                                 | Actbl2     |
| Met I; Met II | D3ZSA9_RAT | D3ZSA9 | Nodal modulator 1                                         | Nomo1      |
| Met II        | D3ZSY5_RAT | D3ZSY5 | keratin 84                                                | Krt84      |
| Met II        | D3ZTJ0_RAT | D3ZTJ0 | Protein XRP2                                              | Rp2        |
| Met II        | D3ZU83_RAT | D3ZU83 | Endoplasmic reticulum-Golgi intermediate compartment 3    | Ergic3     |
| Met II        | D3ZUD8_RAT | D3ZUD8 | Transmembrane 9 superfamily member 3                      | Tm9sf3     |
| Met II        | D3ZUQ7_RAT | D3ZUQ7 | Pantothenate kinase 3                                     | Pank3      |
| Met II        | D3ZUX5_RAT | D3ZUX5 | MICOS complex subunit MIC-19                              | Chchd3     |
| Met II        | D3ZUZ4_RAT | D3ZUZ4 | Glycosaminoglycan xylosylkinase                           | Fam20b     |
| Met I; Met II | D3ZV75_RAT | D3ZV75 | Major facilitator superfamily domain-containing protein 1 | Mfsd1      |
| Met II        | D3ZWS0_RAT | D3ZWS0 | Protein scribble homolog                                  | Scrib      |
| Met II        | D3ZWZ1_RAT | D3ZWZ1 | Integrin alpha X                                          | Itgax      |
| Met II        | D3ZXF9_RAT | D3ZXF9 | 39S ribosomal protein L12, mitochondrial                  | Mrpl12     |
| Met II        | D3ZYM4_RAT | D3ZYM4 | Macrophage stimulating 1 receptor                         | Mst1r      |
| Met I         | D3ZYS7_RAT | D3ZYS7 | Ras GTPase-activating protein 1                           | G3bp1      |
| Met I; Met II | D3ZYW2_RAT | Q499R8 | Heterogeneous nuclear ribonucleoprotein H                 | Hnrmph1    |
| Met I; Met II | D3ZZR9_RAT | D3ZZR9 | Peptidylprolyl isomerase                                  | Fkbp2      |
| Met II        | D3ZZS8_RAT | D3ZZS8 | V-type proton ATPase subunit B, kidney isoform            | Atp6v1b1   |
| Met II        | D4A017_RAT | D4A017 | Transmembrane protein 87 A                                | Tmem87a    |
| Met II        | D4A0E2_RAT | D4A0E2 | NSF attachment protein gamma                              | Napg       |
| Met II        | D4A0G7_RAT | D4A0G7 | Ras-related protein Rab-37                                | Rab37      |
| Met II        | D4A0T0_RAT | D4A0T0 | NADH dehydrogenase 1 beta subcomplex subunit 10           | Ndufb10    |
| Met II        | D4A0T8_RAT | D4A0T8 | Dehydrogenase/reductase SDR family member 7               | Dhrs7      |

|               |            |        |                                                                            |              |
|---------------|------------|--------|----------------------------------------------------------------------------|--------------|
| Met II        | D4A0W1_RAT | D4A0W1 | ER membrane protein complex subunit 4                                      | Emc4         |
| Met I         | D4A0Y9_RAT | D4A0Y9 | Phosphatidylcholine translocator ABCB4                                     | Abcb1b       |
| Met I; Met II | D4A133_RAT | D4A133 | V-type proton ATPase catalytic subunit A                                   | Atp6v1a      |
| Met I; Met II | D4A1D8_RAT | D4A1D8 | Surfeit 4                                                                  | Surf4        |
| Met II        | D4A2H2_RAT | D4A2H2 | Serine palmitoyltransferase 1                                              | Sptlc1       |
| Met II        | D4A2Z6_RAT | D4A2Z6 | Translocation protein SEC63 homolog                                        | Sec63        |
| Met II        | D4A376_RAT | D4A376 | Ras-related protein Rab-12                                                 | Rab12        |
| Met I         | D4A3S8_RAT | D4A3S8 | NOL1/NOP2/Sun domain family member 2                                       | Nsun2        |
| Met II        | D4A416_RAT | D4A416 | Cleft lip and palate transmembrane protein 1-like protein                  | Clptm1l      |
| Met II        | D4A465_RAT | D4A465 | Ragulator complex protein LAMTOR2                                          | Lamtor2      |
| Met II        | D4A4J3_RAT | D4A4J3 | Alpha-mannosidase 2x                                                       | Man2a2       |
| Met II        | D4A4T0_RAT | D4A4T0 | STIP1 homology and U box-containing protein 1                              | Stub1        |
| Met II        | D4A533_RAT | D4A533 | Transmembrane anterior posterior transformation protein 1                  | Tapt1        |
| Met II        | D4A5K6_RAT | D4A5K6 | Zinc metallopeptidase STE24                                                | Zmpste24     |
| Met I         | D4A6A2_RAT | D4A6A2 | Heterogeneous nuclear ribonucleoprotein A3-like                            | LOC100911361 |
| Met I         | D4A720_RAT | D4A720 | Serine/arginine-rich splicing factor 7 isoform 2                           | Srsf7        |
| Met II        | D4A781_RAT | D4A781 | Importin 5                                                                 | Ipo5         |
| Met I         | D4A7U1_RAT | D4A7U1 | Zyxin                                                                      | Zyx          |
| Met I         | D4A7U6_RAT | D4A7U6 | U6 snRNA-associated Sm-like protein LSm3                                   | Lsm3         |
| Met II        | D4A7Y9_RAT | D4A7Y9 | Essential MCU regulator, mitochondrial                                     | Smdt1        |
| Met II        | D4A994_RAT | D4A994 | ER membrane protein complex subunit 1                                      | Emc1         |
| Met I; Met II | D4A9L2_RAT | D4A9L2 | Serine/arginine-rich splicing factor 1                                     | Srsf1        |
| Met I; Met II | D4A9X7_RAT | D4A9X7 | Hypermethylated in cancer 2 protein                                        | Hic2         |
| Met II        | D4AA91_RAT | D4AA91 | Ceramide synthase 5                                                        | Cers5        |
| Met I; Met II | D4AAE9_RAT | D4AAE9 | CDGSH iron-sulfur domain-containing protein 2                              | Cisd2        |
| Met II        | D4AAL4_RAT | D4AAL4 | Adhesion G protein-coupled receptor L3                                     | Adgrl3       |
| Met II        | D4ABI7_RAT | D4ABI7 | Very-long-chain (3R)-3-hydroxyacyl-CoA dehydratase                         | Hacd3        |
| Met II        | D4ABM3_RAT | D4ABM3 | Dishevelled associated activator of morphogenesis 1                        | Daam1        |
| Met II        | D4ABY2_RAT | D4ABY2 | Coatomer subunit gamma 2                                                   | Copg2        |
| Met II        | D4ACG2_RAT | D4ACG2 | Acetolactate synthase-like protein                                         | Ilvbl        |
| Met I         | D4ADD7_RAT | D4ADD7 | Glutaredoxin 5                                                             | Glrx5        |
| Met II        | D4ADE8_RAT | D4ADE8 | ATP-dependent RNA helicase DDX3X                                           | Ddx3x        |
| Met I; Met II | D4ADS9_RAT | D4ADS9 | EFR3 homolog A                                                             | Efr3a        |
| Met II        | D4ADV4_RAT | Q80ZA5 | Sodium-driven chloride bicarbonate exchanger                               | Slc4a10      |
| Met I; Met II | D4AEG2_RAT | D4AEG2 | Ras-related protein Rab-32                                                 | Rab32        |
| Met I         | D4AEP0_RAT | D4AEP0 | Adenylosuccinate synthetase isozyme 2                                      | Adss         |
| Met II        | DAD1_RAT   | P61805 | Dolichyl-diphosphooligosaccharide protein glycosyltransferase subunit DAD1 | Dad1         |
| Met II        | DHC24_RAT  | Q5BQE6 | Delta(24)-sterol reductase                                                 | Dhcr24       |

|               |            |        |                                                                         |         |
|---------------|------------|--------|-------------------------------------------------------------------------|---------|
| Met II        | DHCR7_RAT  | Q9Z2Z8 | 7-dehydrocholesterol reductase                                          | Dhcr7   |
| Met II        | DHE3_RAT   | P10860 | Glutamate dehydrogenase 1                                               | Glud1   |
| Met II        | DHPR_RAT   | P11348 | Dihydropteridine reductase                                              | Qdpr    |
| Met I; Met II | DHSA_RAT   | Q920L2 | Succinate dehydrogenase [ubiquinone] flavoprotein subunit mitochondrial | Sdha    |
| Met II        | DHSB_RAT   | P21913 | Succinate dehydrogenase [ubiquinone] iron-sulfur subunit mitochondrial  | Sdhb    |
| Met I         | DOPD_RAT   | P80254 | D-dopachrome decarboxylase                                              | Ddt     |
| Met I         | DUT_RAT    | P70583 | Deoxyuridine 5'-triphosphate nucleotidohydrolase                        | Dut     |
| Met I         | DX39B_RAT  | Q63413 | Spliceosome RNA helicase Ddx39b                                         | Ddx39b  |
| Met II        | E2AK3_RAT  | Q9Z1Z1 | Eukaryotic translation initiation factor 2-alpha kinase 3               | Eif2ak3 |
| Met I         | E9PSV5_RAT | E9PSV5 | Phosphoserine aminotransferase                                          | Psat1   |
| Met II        | E9PT10_RAT | Q861Q1 | MHC class I antigen                                                     | RT1-CE4 |
| Met I; Met II | E9PT29_RAT | E9PT29 | ATP-dependent RNA helicase DDX17                                        | Ddx17   |
| Met I         | E9PT65_RAT | E9PT65 | Radixin                                                                 | Rdx     |
| Met II        | E9PTI1_RAT | E9PTI1 | V-type proton ATPase subunit H                                          | Atp6v1h |
| Met II        | E9PTU4_RAT | E9PTU4 | Myosin heavy chain 11                                                   | Myh11   |
| Met I; Met II | E9PTW1_RAT | E9PTW1 | Secretory carrier-associated membrane protein                           | Scamp3  |
| Met I; Met II | E9PTX9_RAT | E9PTX9 | Solute carrier family 12 member 2                                       | Slc12a2 |
| Met II        | E9PU37_RAT | E9PU37 | Palmitoyltransferase                                                    | Zdhhc13 |
| Met II        | E9PU77_RAT | E9PU77 | Synaptotagmin-like protein 3                                            | Sytl3   |
| Met I         | E9PU78_RAT | E9PU78 | Isoform Bcl-X(S) of Bcl-2-like protein 1                                | ---     |
| Met II        | ECHA_RAT   | Q64428 | Trifunctional enzyme subunit alpha                                      | Hadha   |
| Met I         | EF1A1_RAT  | P62630 | Elongation factor 1-alpha 1                                             | Eef1a1  |
| Met I; Met II | EF1G_RAT   | Q68FR6 | Elongation factor 1-gamma                                               | Eef1g   |
| Met I; Met II | EF2_RAT    | P05197 | Elongation factor 2                                                     | Eef2    |
| Met II        | EMC2_RAT   | B0BNG0 | ER membrane protein complex subunit 2                                   | Emc2    |
| Met II        | EMC3_RAT   | Q5U2V8 | ER membrane protein complex subunit 3                                   | Emc3    |
| Met II        | EMC8_RAT   | Q5FVL2 | ER membrane protein complex subunit 8                                   | Emc8    |
| Met I; Met II | ENOA_RAT   | P04764 | Alpha-enolase                                                           | Eno1    |
| Met I         | ENOB_RAT   | P15429 | Beta-enolase                                                            | Eno3    |
| Met I; Met II | ENPL_RAT   | Q66HD0 | Endoplasmin                                                             | Hsp90b1 |
| Met II        | ENPP3_RAT  | P97675 | Ectonucleotide pyrophosphatase/phosphodiesterase family member 3        | Enpp3   |
| Met II        | ERLN2_RAT  | B5DEH2 | Erlin-2                                                                 | Erlin2  |
| Met I         | ERO1A_RAT  | Q8R4A1 | ERO1-like protein alpha                                                 | Ero1a   |
| Met I         | ERP29_RAT  | P52555 | Endoplasmic reticulum resident protein 29                               | Erp29   |
| Met II        | ESYT1_RAT  | Q9Z1X1 | Extended synaptotagmin 1                                                | Esyt1   |
| Met I         | EZRI_RAT   | P31977 | Ezrin                                                                   | Ezr     |
| Met I         | F10A1_RAT  | P50503 | Hsc70-interacting protein                                               | St13    |
| Met I         | F1LM33_RAT | F1LM33 | Leucine-rich PPR motif-containing protein mitochondrial isoform         | Lrpprc  |



|               |            |        |                                                                 |           |
|---------------|------------|--------|-----------------------------------------------------------------|-----------|
| Met I; Met II | F1LM66_RAT | F1LM66 | 116 kDa U5 small nuclear ribonucleoprotein component            | Eftud2    |
| Met I         | F1LM82_RAT | F1LM82 | Heterogeneous nuclear ribonucleoproteins A2/B1                  | Hnrnpa2b1 |
| Met II        | F1LMG7_RAT | F1LMG7 | Leucine-rich repeat-containing protein 7                        | Lrrc7     |
| Met II        | F1LMK0_RAT | F1LMK0 | A-kinase anchoring protein 1 isoform 2                          | Akap1     |
| Met I; Met II | F1LMM5_RAT | F1LMM5 | Arachidonate 5-lipoxygenase                                     | Alox5     |
| Met I         | F1LMP7_RAT | F1LMP7 | Granulins                                                       | Grn       |
| Met II        | F1LN88_RAT | F1LN88 | Aldehyde dehydrogenase                                          | Aldh2     |
| Met II        | F1LNC4_RAT | F1LNC4 | Vesicle transport through interaction with t-SNAREs homolog 1B  | Vti1b     |
| Met II        | F1LNF0_RAT | F1LNF0 | Myosin heavy chain 14                                           | Myh14     |
| Met II        | F1LNT8_RAT | F1LNT8 | VAMP8                                                           | Vamp8     |
| Met II        | F1LNX2_RAT | F1LNX2 | Calcium release-activated calcium channel protein 1 (Orai1)     | Orai1     |
| Met II        | F1LP82_RAT | F1LP82 | Ras-related protein Rab-2a                                      | Rab2a     |
| Met II        | F1LPK9_RAT | F1LPK9 | Phosphatidylinositol glycan anchor biosynthesis class U protein | Pigu      |
| Met I         | F1LPV0_RAT | F1LPV0 | Asparagine--tRNA ligase, cytoplasmic                            | Nars      |
| Met I; Met II | F1LQ81_RAT | F1LQ81 | Vesicle-fusing ATPase                                           | Nsf       |
| Met II        | F1LQ92_RAT | F1LQ92 | Sel-1 homolog 1                                                 | Sel1l     |
| Met I         | F1LQJ7_RAT | F1LQJ7 | Phosphoenolpyruvate carboxykinase [GTP], mitochondrial          | Pck2      |
| Met II        | F1LQR8_RAT | F1LQR8 | Inositol 1,4,5-trisphosphate receptor type 2                    | Itpr2     |
| Met I; Met II | F1LRK1_RAT | F1LRK1 | Sodium/potassium-transporting ATPase subunit alpha              | Atp4a     |
| Met II        | F1LRV9_RAT | F1LRV9 | Myosin heavy chain 1                                            | Myh1      |
| Met II        | F1LSI5_RAT | F1LSI5 | Ras GTPase-activating protein 3                                 | Rasa3     |
| Met I         | F1LSN4_RAT | F1LSN4 | Fibroblast growth factor receptor                               | Fgfr3     |
| Met II        | F1LSV4_RAT | Q3B7D2 | Serine palmitoyltransferase 2                                   | Sptlc2    |
| Met II        | F1LT70_RAT | F1LT70 | Pantothenate kinase 2                                           | Pank2     |
| Met II        | F1LU48_RAT | F1LU48 | Endoplasmic reticulum-golgi intermediate compartment 1          | Ergic1    |
| Met II        | F1LVC3_RAT | F1LVC3 | Ras-related protein Rab-6b                                      | Rab6b     |
| Met I         | F1LVV4_RAT | F1LVV4 | Protein RCC2                                                    | Rcc2      |
| Met II        | F1LW77_RAT | F1LW77 | Ras-related protein Rab-33b                                     | Rab33b    |
| Met II        | F1LX07_RAT | F1LX07 | Solute carrier family 25 member 12                              | Slc25a12  |
| Met I; Met II | F1LZW6_RAT | F1LZW6 | Solute carrier family 25 member 13                              | Slc25a13  |
| Met II        | F1LZX9_RAT | F1LZX9 | Integrin alpha 5                                                | Itgav     |
| Met I; Met II | F1M0G0_RAT | F1M0G0 | Regulator of G-protein signaling 17                             | Rgs17     |
| Met I; Met II | F1M0J3_RAT | F1M0J3 | Sodium bicarbonate cotransporter 3, isophorm 4                  | Slc4a7    |
| Met II        | F1M1U0_RAT | F1M1U0 | Matrix remodeling associated 7                                  | Mxra7     |
| Met I         | F1M2K3_RAT | F1M2K3 | Small ubiquitin-related modifier                                | Sumo2     |
| Met I         | F1M2P8_RAT | F1M2P8 | Protein kinase C alpha                                          | Prkca     |
| Met II        | F1M391_RAT | F1M391 | Stimulator of interferon genes protein                          | Tmem173   |
| Met I         | F1M4T3_RAT | B2RYQ5 | Enhancer of rudimentary homolog                                 | Erh       |

|               |            |        |                                                                  |          |
|---------------|------------|--------|------------------------------------------------------------------|----------|
| Met II        | F1M5Z5_RAT | F1M5Z5 | Anoctamin-6                                                      | Ano6     |
| Met II        | F1M6W2_RAT | F1M6W2 | Endoplasmic reticulum metallopeptidase 1                         | Ermp1    |
| Met II        | F1M779_RAT | F1M779 | Clathrin heavy chain                                             | Cltc     |
| Met II        | F1M790_RAT | F1M790 | Prostaglandin F2 receptor negative regulator                     | Ptgfrn   |
| Met I; Met II | F1M7T6_RAT | F1M7T6 | Translocon-associated protein subunit gamma                      | Ssr3     |
| Met II        | F1M8F6_RAT | F1M8F6 | Myosin heavy chain 8                                             | Myh8     |
| Met I         | F1M8X9_RAT | F1M8X9 | Golgi brefeldin A-resistant guanine nucleotide exchange factor 1 | Gbf1     |
| Met II        | F1MA50_RAT | F1MA50 | transmembrane protein 123                                        | Tmem123  |
| Met II        | F1MA89_RAT | F1MA89 | Cyclin Y                                                         | Ccny     |
| Met II        | F1MAS0_RAT | F1MAS0 | keratin 32                                                       | Krt32    |
| Met II        | F6T9E7_RAT | F6T9E7 | P-selectin glycoprotein ligand 1                                 | Selplg   |
| Met II        | F7EP67_RAT | Q6IN10 | Endothelin-converting enzyme 1 Isoform                           | Ece1     |
| Met I         | F7EPH4_RAT | F7EPH4 | Inorganic Pyrophosphatase                                        | Ppa1     |
| Met I         | F7EWC1_RAT | F7EWC1 | Vasodilator-stimulated phosphoprotein                            | Vasp     |
| Met I; Met II | F7F4S8_RAT | B2RYB8 | Integrin beta 2                                                  | Itgb2    |
| Met II        | F7F744_RAT | Q6S395 | Plectin                                                          | Plec     |
| Met I; Met II | F7FFV2_RAT | F7FFV2 | keratin 5                                                        | Krt5     |
| Met II        | F7FKI5_RAT | F7FKI5 | Pyruvate dehydrogenase component E1 alpha                        | Pdha1    |
| Met II        | F7FNS3_RAT | F7FNS3 | Derlin                                                           | Derl1    |
| Met I         | F7FP91_RAT | Q95II0 | MHC class Ib antigen                                             | RT1-CE5  |
| Met II        | FACR1_RAT  | Q66H50 | Fatty acyl-CoA reductase 1                                       | Far1     |
| Met II        | FADS2_RAT  | Q9Z122 | Acyl-CoA 6-desaturase                                            | Fads2    |
| Met II        | FAF2_RAT   | Q5BK32 | FAS-associated factor 2                                          | Faf2     |
| Met II        | FAM3C_RAT  | Q810F4 | Protein FAM3C                                                    | Fam3c    |
| Met I; Met II | FCERB_RAT  | P13386 | High affinity immunoglobulin epsilon receptor subunit beta       | Ms4a2    |
| Met II        | FCERG_RAT  | P20411 | High affinity immunoglobulin epsilon receptor subunit gamma      | Fcer1g   |
| Met I         | FEN1_RAT   | Q5XIP6 | Flap endonuclease 1                                              | Fen1     |
| Met II        | FGOP2_RAT  | Q6TA25 | FGFR1 oncogene partner 2 homolog                                 | Fgfr1op2 |
| Met I; Met II | FGR_RAT    | Q6P6U0 | Tyrosine-protein kinase Fgr                                      | Fgr      |
| Met II        | FIS1_RAT   | P84817 | Mitochondrial fission 1 protein                                  | Fis1     |
| Met I         | FKB1A_RAT  | Q62658 | Peptidyl-prolyl cis-trans isomerase FKBP1A                       | Fkbp1a   |
| Met II        | FKBP8_RAT  | Q3B7U9 | Peptidyl-prolyl cis-trans isomerase FKBP8                        | Fkbp8    |
| Met II        | FLOT1_RAT  | Q9Z1E1 | Flotillin-1                                                      | Flot1    |
| Met II        | FLOT2_RAT  | Q9Z2S9 | Flotillin-2                                                      | Flot2    |
| Met I         | FPPS_RAT   | P05369 | Farnesyl pyrophosphate synthase                                  | Fdps     |
| Met II        | FRK_RAT    | Q62662 | Tyrosine-protein kinase FRK                                      | Frk      |
| Met II        | FUT8_RAT   | Q6EV76 | Alpha-(1,6)-fucosyltransferase                                   | Fut8     |
| Met I; Met II | G3P_RAT    | P04797 | Glyceraldehyde-3-phosphate dehydrogenase                         | Gapdh    |

|               |            |        |                                                          |              |
|---------------|------------|--------|----------------------------------------------------------|--------------|
| Met II        | G3PT_RAT   | Q9ESV6 | Glyceraldehyde-3-phosphate dehydrogenase testis-specific | Gapdhs       |
| Met II        | G3V608_RAT | G3V608 | Interleukin-3 receptor subunit beta                      | Csf2rb       |
| Met II        | G3V637_RAT | G3V637 | Syntaxin-binding protein 2, isoform                      | Stxbp2       |
| Met II        | G3V667_RAT | G3V667 | Integrin alpha 6                                         | Itga6        |
| Met I; Met II | G3V679_RAT | G3V679 | Transferrin receptor protein 1                           | Tfrc         |
| Met I; Met II | G3V6D3_RAT | G3V6D3 | ATP synthase subunit beta                                | Atp5f1b      |
| Met II        | G3V6E1_RAT | G3V6E1 | Myosin heavy chain 2                                     | Myh2         |
| Met I         | G3V6G5_RAT | G3V6G5 | F-box-like/WD repeat-containing protein TBL1X            | Tbl1x        |
| Met II        | G3V6H0_RAT | G3V6H0 | Ras-related protein Rab-1b                               | LOC100363782 |
| Met II        | G3V6H5_RAT | G3V6H5 | Solute carrier family 25 member 11                       | Slc25a11     |
| Met II        | G3V6N2_RAT | G3V6N2 | Transmembrane emp24 domain-containing protein 4          | Tmed4        |
| Met I; Met II | G3V6P7_RAT | G3V6P7 | Myosin heavy chain 9                                     | Myh9         |
| Met I; Met II | G3V6P8_RAT | G3V6P8 | Guanine nucleotide-binding protein gamma-12              | Gng12        |
| Met II        | G3V6R4_RAT | G3V6R4 | Leucine-rich repeat-containing protein 1                 | Lrrc1        |
| Met II        | G3V6T1_RAT | G3V6T1 | Coatomer subunit alpha                                   | Copa         |
| Met I         | G3V6T7_RAT | G3V6T7 | Protein disulfide-isomerase A4                           | Pdia4        |
| Met I; Met II | G3V6W2_RAT | G3V6W2 | Prolactin regulatory element-binding protein             | Preb         |
| Met II        | G3V712_RAT | G3V712 | keratin 7                                                | Krt7         |
| Met I; Met II | G3V741_RAT | G3V741 | Solute carrier family 25 member 3                        | Slc25a3      |
| Met II        | G3V784_RAT | G3V784 | ADP-dependent glucokinase                                | Adpgk        |
| Met II        | G3V7A5_RAT | G3V7A5 | Low density lipoprotein receptor isoform                 | Ldlr         |
| Met II        | G3V7I0_RAT | G3V7I0 | Peroxiredoxin-3                                          | Prdx3        |
| Met II        | G3V7I3_RAT | G3V7I3 | Manganese-transporting ATPase 13A1                       | Atp13a1      |
| Met I         | G3V7J7_RAT | G3V7J7 | Eukaryotic translation initiation factor 5A-2            | Eif5a2       |
| Met II        | G3V7L8_RAT | G3V7L8 | V-type proton ATPase subunit E 1 isoform                 | Atp6v1e1     |
| Met II        | G3V7M2_RAT | G3V7M2 | Integrin beta 7                                          | Itgb7        |
| Met II        | G3V7N0_RAT | G3V7N0 | Heparan sulfate 2-O-sulfotransferase 1                   | Hs2st1       |
| Met II        | G3V7N6_RAT | G3V7N6 | Lysophospholipid acyltransferase 7                       | Mboat7l1     |
| Met I; Met II | G3V7Q7_RAT | G3V7Q7 | Ras GTPase-activating-like protein IQGAP1                | Iqgap1       |
| Met II        | G3V7U6_RAT | G3V7U6 | Calpain 5                                                | Capn5        |
| Met II        | G3V7Y9_RAT | P28494 | Alpha-mannosidase 2                                      | Man2a1       |
| Met I         | G3V852_RAT | G3V852 | Talin-1                                                  | Tln1         |
| Met II        | G3V878_RAT | G3V878 | Signal peptidase complex catalytic subunit SEC11         | Sec11c       |
| Met II        | G3V887_RAT | G3V887 | V-type proton ATPase subunit A                           | Tcirg1       |
| Met I         | G3V8A5_RAT | G3V8A5 | Vacuolar protein sorting-associated protein 35           | Vps35        |
| Met I         | G3V8C4_RAT | G3V8C4 | Chloride intracellular channel protein 4                 | Clic4        |
| Met II        | G3V8F5_RAT | G3V8F5 | Mitochondrial import receptor subunit TOM40 homolog      | Tomm40       |
| Met I; Met II | G3V8G5_RAT | G3V8G5 | Golgi apparatus protein 1                                | Glg1         |

|               |            |        |                                                                     |         |
|---------------|------------|--------|---------------------------------------------------------------------|---------|
| Met II        | G3V8I4_RAT | G3V8I4 | Syntaxin-4A                                                         | Stx4    |
| Met II        | G3V8L7_RAT | G3V8L7 | Integrin alpha M                                                    | Itgam   |
| Met II        | G3V8Q1_RAT | G3V8Q1 | Coatomer subunit epsilon                                            | Cope    |
| Met II        | G3V8V4_RAT | G3V8V4 | Ceramide synthase 2                                                 | Cers2   |
| Met II        | G3V8Z1_RAT | G3V8Z1 | Linker for activation of T-cells family member 2 (NTAL)             | Lat2    |
| Met I; Met II | G3V908_RAT | G3V908 | keratin, type II Kb15                                               | Kb15    |
| Met I; Met II | G3V936_RAT | G3V936 | Citrate synthase                                                    | Cs      |
| Met II        | G3V964_RAT | G3V964 | Neurotrimin                                                         | Ntm     |
| Met I         | G3V993_RAT | G3V993 | SAM domain, SH3 domain and nuclear localization signals, 1 (SAMNS1) | Samsn1  |
| Met I         | G3V9A3_RAT | G3V9A3 | 14-3-3 protein sigma                                                | Sfn     |
| Met II        | G3V9N0_RAT | G3V9N0 | Polyadenylate-binding protein 4                                     | Pabpc4  |
| Met II        | G3V9N9_RAT | G3V9N9 | alpha-1,2-Mannosidase                                               | Man1a1  |
| Met II        | G3V9S3_RAT | G3V9S3 | Tyrosine-protein phosphatase non-receptor type 13                   | Ptpn13  |
| Met I; Met II | G3V9U7_RAT | G3V9U7 | Sarcoplasmic/endoplasmic reticulum calcium ATPase 3 (SERCA3)        | Atp2a3  |
| Met II        | G3V9W2_RAT | G3V9W2 | Tyrosine-protein kinase JAK1                                        | Jak1    |
| Met II        | G3V9X8_RAT | G3V9X8 | Magnesium transporter protein 1                                     | Magt1   |
| Met II        | G3V9Y2_RAT | G3V9Y2 | Phospholipid phosphatase 1                                          | Plpp1   |
| Met II        | GALT1_RAT  | Q10473 | Polypeptide N-acetylgalactosaminyltransferase 1                     | Galnt1  |
| Met II        | GALT7_RAT  | Q9R0C5 | Polypeptide N-acetylgalactosaminyltransferase 7                     | Galnt7  |
| Met I; Met II | GBB1_RAT   | P54311 | Transducin beta-1                                                   | Gnb1    |
| Met I; Met II | GBB2_RAT   | P54313 | Transducin beta-2                                                   | Gnb2    |
| Met II        | GBB4_RAT   | O35353 | Transducin beta-4                                                   | Gnb4    |
| Met I         | GDIA_RAT   | P50398 | Rab GDP dissociation inhibitor alpha                                | Gdi1    |
| Met I         | GDIB_RAT   | P50399 | Rab GDP dissociation inhibitor beta                                 | Gdi2    |
| Met I         | GDIR1_RAT  | Q5XI73 | Rho GDP dissociation inhibitor 1                                    | Arhgdia |
| Met I         | GELS_RAT   | Q68FP1 | Gelsolin                                                            | Gsn     |
| Met I; Met II | GFAP_RAT   | P47819 | Glial fibrillary acidic protein                                     | Gfap    |
| Met II        | GHITM_RAT  | Q5XIA8 | Growth hormone-inducible transmembrane protein                      | Ghitm   |
| Met II        | GL8D1_RAT  | Q6AYF6 | Glycosyltransferase 8 domain-containing protein 1                   | Glt8d1  |
| Met I         | GLOD4_RAT  | Q5I0D1 | Glyoxalase domain-containing protein 4                              | Glod4   |
| Met II        | GNA11_RAT  | Q9JID2 | Guanine nucleotide-binding protein alpha-11                         | Gna11   |
| Met I; Met II | GNAI2_RAT  | P04897 | Guanine nucleotide-binding protein G(i) subunit alpha-2             | Gnai2   |
| Met I; Met II | GNAI3_RAT  | P08753 | Guanine nucleotide-binding protein G(k) subunit alpha               | Gnai3   |
| Met II        | GNAQ_RAT   | P82471 | Guanine nucleotide-binding protein G(q) subunit alpha               | Gnaq    |
| Met I         | GNAS1_RAT  | Q63803 | Guanine nucleotide-binding protein G(s) subunit alpha isoforms XLas | Gnas    |
| Met I; Met II | GNAS2_RAT  | P63095 | Guanine nucleotide-binding protein G(s) subunit alpha               | Gnas    |
| Met I; Met II | GNAZ_RAT   | P19627 | Guanine nucleotide-binding protein G(z) subunit alpha               | Gnaz    |
| Met II        | GOGA2_RAT  | Q62839 | Golgin subfamily A member 2                                         | Golga2  |

|               |           |        |                                                                   |                             |
|---------------|-----------|--------|-------------------------------------------------------------------|-----------------------------|
| Met II        | GOGA7_RAT | Q6AYQ1 | Golgin subfamily A member 7                                       | Golga7                      |
| Met II        | GOLI4_RAT | Q5BJK8 | Golgi integral membrane protein 4                                 | Golim4                      |
| Met II        | GOSR2_RAT | O35165 | Golgi SNAP receptor complex member 2                              | Gosr2                       |
| Met I; Met II | GPDM_RAT  | P35571 | Glycerol-3-phosphate dehydrogenase mitochondrial                  | Gpd2                        |
| Met II        | GPSM3_RAT | Q6MG88 | G-protein-signaling modulator 3                                   | Gpsm3                       |
| Met I; Met II | GRP75_RAT | P48721 | Mortalin                                                          | Hspa9                       |
| Met I; Met II | GRP78_RAT | P06761 | Endoplasmic reticulum chaperone BiP                               | Hspa5                       |
| Met I; Met II | GTR1_RAT  | P11167 | Solute carrier family 2, facilitated glucose transporter member 1 | Slc2a1                      |
| Met I; Met II | GTR3_RAT  | Q07647 | Solute carrier family 2, facilitated glucose transporter member 3 | Slc2a3                      |
| Met I; Met II | H14_RAT   | P15865 | Histone H1.4                                                      | Hist1h1e                    |
| Met I; Met II | H4_RAT    | P62804 | Histone H4                                                        | Hist1h4b; Hist1h4m; Hist4h4 |
| Met II        | HA12_RAT  | P16391 | RT1 class I histocompatibility antigen AA alpha chain             | ---                         |
| Met I         | HAP28_RAT | Q62785 | 28 kDa heat- and acid-stable phosphoprotein                       | Pdap1                       |
| Met I         | HMCS1_RAT | P17425 | Hydroxymethylglutaryl-CoA synthase cytoplasmic                    | Hmgcs1                      |
| Met II        | HMOX1_RAT | P06762 | Heme oxygenase 1                                                  | Hmox1                       |
| Met II        | HMOX2_RAT | P23711 | Heme oxygenase 2                                                  | Hmox2                       |
| Met II        | HNRPF_RAT | Q794E4 | Heterogeneous nuclear ribonucleoprotein F                         | Hnrnpf                      |
| Met II        | HRG1_RAT  | B0BNL4 | Heme transporter HRG1                                             | Slc48a1                     |
| Met I; Met II | HS90A_RAT | P82995 | Heat shock protein HSP 90-alpha                                   | Hsp90aa1                    |
| Met I; Met II | HS90B_RAT | P34058 | Heat shock protein HSP 90-beta                                    | Hsp90ab1                    |
| Met I; Met II | HSP72_RAT | P14659 | Heat shock-related 70 kDa protein 2                               | Hspa2                       |
| Met I         | HSP74_RAT | O88600 | Heat shock 70 kDa protein 4                                       | Hspa4                       |
| Met II        | HSP7C_RAT | P63018 | Heat shock cognate 71 kDa protein                                 | Hspa8                       |
| Met I         | HXK1_RAT  | P05708 | Hexokinase-1                                                      | Hk1                         |
| Met I         | HXK2_RAT  | P27881 | Hexokinase-2                                                      | Hk2                         |
| Met II        | ICAM1_RAT | Q00238 | Intercellular adhesion molecule 1 (ICAM1)                         | Icam1                       |
| Met I         | ICK_RAT   | Q62726 | Serine/threonine-protein kinase ICK                               | Ick                         |
| Met I; Met II | IF4A2_RAT | Q5RKI1 | Eukaryotic initiation factor 4A-II                                | Eif4a2                      |
| Met I         | IF4A3_RAT | Q3B8Q2 | Eukaryotic initiation factor 4A-III                               | Eif4a3                      |
| Met I         | IF5A1_RAT | Q3T1J1 | Eukaryotic translation initiation factor 5A-1                     | Eif5a                       |
| Met I         | IF6_RAT   | Q3KRD8 | Eukaryotic translation initiation factor 6                        | Eif6                        |
| Met II        | IKIP_RAT  | Q5EAJ6 | Inhibitor kappa-B kinase-interacting protein                      | Ikbip                       |
| Met I         | ILEUA_RAT | Q4G075 | Leukocyte elastase inhibitor                                      | Serp1nb1a                   |
| Met I; Met II | ILRL1_RAT | Q62611 | Interleukin 1 receptor-like 1                                     | Il1rl1                      |
| Met I; Met II | IMB1_RAT  | P52296 | Importin subunit beta-1                                           | Kpnb1                       |
| Met I; Met II | IMMT_RAT  | Q3KR86 | MICOS complex subunit Mic60                                       | Immt                        |
| Met II        | IMPA3_RAT | D4AD37 | Inositol monophosphatase 3                                        | Impad1                      |
| Met II        | IR3IP_RAT | P85007 | Immediate early response 3-interacting protein 1                  | Ier3ip1                     |

|               |           |        |                                                                |         |
|---------------|-----------|--------|----------------------------------------------------------------|---------|
| Met II        | IRK2_RAT  | Q64273 | Inward rectifier potassium channel 2                           | Kcnj2   |
| Met II        | ITAD_RAT  | Q9QYE7 | Integrin alpha D                                               | Itgad   |
| Met II        | ITB1_RAT  | P49134 | Integrin beta 1                                                | Itgb1   |
| Met I; Met II | ITFG3_RAT | Q5M7W6 | Protein FAM234A                                                | Fam234a |
| Met II        | ITM2B_RAT | Q5XIE8 | Integral membrane protein 2B                                   | Itm2b   |
| Met I; Met II | ITM2C_RAT | Q5PQL7 | Integral membrane protein 2C                                   | Itm2c   |
| Met II        | ITPR2_RAT | P29995 | Inositol 1,4,5-trisphosphate receptor type 2                   | Itpr2   |
| Met II        | ITPR3_RAT | Q63269 | Inositol 1,4,5-trisphosphate receptor type 3                   | Itpr3   |
| Met I; Met II | K1C10_RAT | Q6IFW6 | Keratin, type I cytoskeletal 10                                | Krt10   |
| Met I; Met II | K1C14_RAT | Q6IFV1 | Keratin, type I cytoskeletal 14                                | Krt14   |
| Met I; Met II | K1C15_RAT | Q6IFV3 | Keratin, type I cytoskeletal 15                                | Krt15   |
| Met I; Met II | K1C17_RAT | Q6IFU8 | Keratin, type I cytoskeletal 17                                | Krt17   |
| Met II        | K1C18_RAT | Q5BJY9 | Keratin, type I cytoskeletal 18                                | Krt18   |
| Met II        | K1C42_RAT | Q6IFU7 | Keratin, type I cytoskeletal 42                                | Krt42   |
| Met II        | K22E_RAT  | Q6IG02 | Keratin, type II cytoskeletal 2 epidermal                      | Krt2    |
| Met I; Met II | K2C1_RAT  | Q6IMF3 | Keratin, type II cytoskeletal 1                                | Krt1    |
| Met I; Met II | K2C1B_RAT | Q6IG01 | Keratin, type II cytoskeletal 1B                               | Krt77   |
| Met II        | K2C4_RAT  | Q6IG00 | Keratin, type II cytoskeletal 4                                | Krt4    |
| Met I         | K2C5_RAT  | Q6P6Q2 | Keratin, type II cytoskeletal 5                                | Krt5    |
| Met I; Met II | K2C6A_RAT | Q4FZU2 | Keratin, type II cytoskeletal 6A                               | Krt6a   |
| Met II        | K2C7_RAT  | Q6IG12 | Keratin, type II cytoskeletal 7                                | Krt7    |
| Met I; Met II | K2C73_RAT | Q6IG03 | Keratin, type II cytoskeletal 73                               | Krt73   |
| Met I; Met II | K2C75_RAT | Q6IG05 | Keratin, type II cytoskeletal 75                               | Krt75   |
| Met I; Met II | K2C8_RAT  | Q10758 | Keratin, type II cytoskeletal 8                                | Krt8    |
| Met I         | KAP0_RAT  | P09456 | cAMP-dependent protein kinase type I-alpha regulatory subunit  | Prkar1a |
| Met II        | KAP2_RAT  | P12368 | cAMP-dependent protein kinase type II-alpha regulatory subunit | Prkar2a |
| Met II        | KC1G1_RAT | Q62761 | Casein kinase I isoform gamma-1                                | Csnk1g1 |
| Met II        | KC1G2_RAT | Q62762 | Casein kinase I isoform gamma-2                                | Csnk1g2 |
| Met II        | KC1G3_RAT | Q62763 | Casein kinase I isoform gamma-3                                | Csnk1g3 |
| Met I         | KCY_RAT   | Q4KM73 | UMP-CMP kinase                                                 | Cmpk1   |
| Met I; Met II | KPYM_RAT  | P11980 | Pyruvate kinase PKM                                            | Pkm     |
| Met I         | KPYR_RAT  | P12928 | Pyruvate kinase PKLR                                           | Pklr    |
| Met II        | LAMP1_RAT | P14562 | Lysosome-associated membrane glycoprotein 1 (Lamp1)            | Lamp1   |
| Met II        | LAMP2_RAT | P17046 | Lysosome-associated membrane glycoprotein 2 (Lamp2)            | Lamp2   |
| Met I; Met II | LAP2_RAT  | Q62733 | Lamina-associated polypeptide 2 isoform beta                   | Tmpo    |
| Met I; Met II | LAT_RAT   | O70601 | Linker for activation of T-cells family member 1 (LAT)         | Lat     |
| Met II        | LAT1_RAT  | Q63016 | Large neutral amino acids transporter small subunit 1          | Slc7a5  |
| Met II        | LBR_RAT   | O08984 | Lamin-B receptor                                               | Lbr     |

|               |            |        |                                                                        |         |
|---------------|------------|--------|------------------------------------------------------------------------|---------|
| Met I         | LCK_RAT    | Q01621 | Tyrosine-protein kinase LCK                                            | Lck     |
| Met I; Met II | LDHA_RAT   | P04642 | L-lactate dehydrogenase A chain                                        | Ldha    |
| Met II        | LDLR_RAT   | P35952 | Low-density lipoprotein receptor                                       | Ldlr    |
| Met I         | LEG1_RAT   | P11762 | Galectin-1                                                             | Lgals1  |
| Met II        | LETM1_RAT  | Q5XIN6 | Mitochondrial proton/calcium exchanger protein                         | Letm1   |
| Met II        | LEUK_RAT   | P13838 | Leukosialin                                                            | Spn     |
| Met II        | LMAN1_RAT  | Q62902 | Lectin mannose-binding 1                                               | Lman1   |
| Met II        | LMBD1_RAT  | Q6AZ61 | Probable lysosomal cobalamin transporter                               | Lmbrd1  |
| Met II        | LMF2_RAT   | A1L1J9 | Lipase maturation factor 2                                             | Lmf2    |
| Met I; Met II | LPPRC_RAT  | Q5SGE0 | Leucine-rich PPR motif-containing protein mitochondrial                | Lrpprc  |
| Met I; Met II | LRC59_RAT  | Q5RJR8 | Leucine-rich repeat-containing protein 59                              | Lrrc59  |
| Met I; Met II | LTOR1_RAT  | Q6P791 | Ragulator complex protein LAMTOR1                                      | Lamtor1 |
| Met II        | LTOR3_RAT  | Q5U204 | Ragulator complex protein LAMTOR3                                      | Lamtor3 |
| Met I; Met II | LYN_RAT    | Q07014 | Tyrosine-protein kinase Lyn                                            | Lyn     |
| Met II        | M0R402_RAT | M0R402 | Protein disulfide-isomerase TMX3                                       | Tmx3    |
| Met I         | M0R5K9_RAT | M0R5K9 | 40S ribosomal protein S18                                              | ---     |
| Met I         | M0R866_RAT | M0R866 | Uncharacterized protein                                                | ---     |
| Met I         | M0R9L0_RAT | M0R9L0 | Nascent polypeptide-associated complex subunit alpha                   | Naca    |
| Met II        | M0RAJ8_RAT | M0RAJ8 | 40S ribosomal protein S2                                               | ---     |
| Met I         | M0RAU0_RAT | M0RAU0 | Advanced glycosylation end product-specific receptor                   | Ager    |
| Met II        | M0RBJ0_RAT | M0RBJ0 | Guanine nucleotide-binding protein gamma-2                             | Gng2    |
| Met II        | M0RC99_RAT | M0RC99 | Ras-related protein Rab-5a                                             | Rab5a   |
| Met II        | M0RCA3_RAT | M0RCA3 | Zinc finger protein-like 1                                             | Zfp11   |
| Met II        | M0RCF3_RAT | M0RCF3 | Integrin beta 3                                                        | Itgb3   |
| Met II        | M0RCS2_RAT | M0RCS2 | Transducin beta-like protein 2                                         | Tbl2    |
| Met II        | M0RD75_RAT | M0RD75 | 40S ribosomal protein S6                                               | Rps6    |
| Met II        | M0RDI5_RAT | M0RDI5 | Mitochondrial calcium uniporter                                        | Mcu     |
| Met I         | M0RDJ4_RAT | M0RDJ4 | Glia maturation factor beta                                            | Gmfb    |
| Met I         | MAK_RAT    | P20793 | Serine/threonine-protein kinase MAK                                    | Mak     |
| Met I         | MANF_RAT   | P0C5H9 | Mesencephalic astrocyte-derived neurotrophic factor                    | Manf    |
| Met I         | MARE1_RAT  | Q66HR2 | Microtubule-associated protein RP/EB family member 1                   | Mapre1  |
| Met II        | MAVS_RAT   | Q66HG9 | Mitochondrial antiviral-signaling protein                              | Mavs    |
| Met II        | MBOA5_RAT  | Q5FVN0 | Lysophospholipid acyltransferase 5                                     | Lpcat3  |
| Met I         | MDHC_RAT   | O88989 | Malate dehydrogenase cytoplasmic                                       | Mdh1    |
| Met I; Met II | MDHM_RAT   | P04636 | Malate dehydrogenase mitochondrial                                     | Mdh2    |
| Met II        | MGAT2_RAT  | Q09326 | Alpha-1,6-mannosyl-glycoprotein 2-beta-N-acetylglucosaminyltransferase | Mgat2   |
| Met II        | MIRO2_RAT  | Q7TSA0 | Mitochondrial Rho GTPase 2                                             | Rhot2   |
| Met I         | MK03_RAT   | P21708 | Mitogen-activated protein kinase 3                                     | Mapk3   |

|               |            |        |                                                                      |          |
|---------------|------------|--------|----------------------------------------------------------------------|----------|
| Met II        | MLEC_RAT   | Q5FVQ4 | Malectin                                                             | Mlec     |
| Met II        | MMGT1_RAT  | B5DF51 | Membrane magnesium transporter 1                                     | Mmgt1    |
| Met II        | MOGS_RAT   | O88941 | Mannosyl-oligosaccharide glucosidase                                 | Mogs     |
| Met II        | MOSC2_RAT  | O88994 | Mitochondrial amidoxime reducing component 2                         | Marc2    |
| Met I; Met II | MOT1_RAT   | P53987 | Monocarboxylate transporter 1                                        | Slc16a1  |
| Met I         | MPRD_RAT   | Q6AY20 | Cation-dependent mannose-6-phosphate receptor                        | M6pr     |
| Met II        | MRLCA_RAT  | P13832 | Myosin regulatory light chain RLC-A                                  | Rlc-a    |
| Met II        | MSMO1_RAT  | O35532 | Methylsterol monooxygenase 1                                         | Msmo1    |
| Met I         | MTPN_RAT   | P62775 | Myotrophin                                                           | Mtpn     |
| Met II        | MYH10_RAT  | Q9JLT0 | Myosin heavy chain 10                                                | Myh10    |
| Met I; Met II | MYL6_RAT   | Q64119 | Myosin light polypeptide 6                                           | Myl6     |
| Met II        | NB5R3_RAT  | P20070 | NADH-cytochrome b5 reductase 3                                       | Cyb5r3   |
| Met I         | NCF2_RAT   | A7E3N2 | Neutrophil cytosol factor 2                                          | Ncf2     |
| Met II        | NCLN_RAT   | Q5XIA1 | Nicalin                                                              | Ncln     |
| Met I; Met II | NCPR_RAT   | P00388 | NADPH--cytochrome P450 reductase                                     | Por      |
| Met II        | NCUG1_RAT  | Q68FV6 | Glycosylated lysosomal membrane protein                              | Glmpr    |
| Met I         | NDKA_RAT   | Q05982 | Nucleoside diphosphate kinase A                                      | Nme1     |
| Met I         | NDKB_RAT   | P19804 | Nucleoside diphosphate kinase B                                      | Nme2     |
| Met II        | NDUAA_RAT  | Q561S0 | NADH dehydrogenase [ubiquinone] 1 alpha subcomplex subunit 10        | Ndufa10  |
| Met II        | NDUF5_RAT  | B2GV71 | NADH dehydrogenase [ubiquinone] 1 alpha subcomplex assembly factor 5 | Ndufaf5  |
| Met I; Met II | NDUS1_RAT  | Q66HF1 | NADH-ubiquinone oxidoreductase 75 kDa subunit mitochondrial          | Ndufs1   |
| Met II        | NDUS2_RAT  | Q641Y2 | NADH dehydrogenase [ubiquinone] iron-sulfur protein 2                | Ndufs2   |
| Met I; Met II | NDUV2_RAT  | P19234 | NADH dehydrogenase [ubiquinone] flavoprotein 2 mitochondrial         | Ndufv2   |
| Met I         | NEDD4_RAT  | Q62940 | E3 ubiquitin-protein ligase NEDD4                                    | Nedd4    |
| Met I         | NHRF1_RAT  | Q9JJ19 | Na(+)/H(+) exchange regulatory cofactor NHE-RF1                      | Slc9a3r1 |
| Met I; Met II | NICA_RAT   | Q8CGU6 | Nicastrin                                                            | Ncstn    |
| Met I         | NP1L4_RAT  | Q5U2Z3 | Nucleosome assembly protein 1-like 4                                 | Nap1l4   |
| Met I         | NPM_RAT    | P13084 | Nucleophosmin                                                        | Npm1     |
| Met II        | NPTN_RAT   | P97546 | Neuroplastin                                                         | Nptn     |
| Met I         | NQO1_RAT   | P05982 | NAD(P)H dehydrogenase [quinone] 1                                    | Nqo1     |
| Met I         | NSDHL_RAT  | Q5PPL3 | Sterol-4-alpha-carboxylate 3-dehydrogenase decarboxylating           | Nsdhl    |
| Met I         | NSF1C_RAT  | O35987 | NSFL1 cofactor p47                                                   | Nsfl1c   |
| Met I         | NTF2_RAT   | P61972 | Nuclear transport factor 2                                           | Nutf2    |
| Met II        | NUCB1_RAT  | Q63083 | Nucleobindin-1                                                       | Nucb1    |
| Met II        | NUCB2_RAT  | Q9JI85 | Nucleobindin-2                                                       | Nucb2    |
| Met I; Met II | NUCL_RAT   | P13383 | Nucleolin                                                            | Ncl      |
| Met II        | O89035_RAT | O89035 | Solute carrier family 25 member 10                                   | Slc25a10 |
| Met II        | OCAD1_RAT  | Q5XIG4 | OCIA domain-containing protein 1                                     | Ociad1   |



|               |           |        |                                                                         |        |
|---------------|-----------|--------|-------------------------------------------------------------------------|--------|
| Met II        | ODO1_RAT  | Q5XI78 | 2-oxoglutarate dehydrogenase complex component E1                       | Ogdh   |
| Met II        | ODO2_RAT  | Q01205 | 2-oxoglutarate dehydrogenase complex component E2                       | Dlst   |
| Met I; Met II | ODP2_RAT  | P08461 | Pyruvate dehydrogenase component E2                                     | Dlat   |
| Met II        | ODPB_RAT  | P49432 | Pyruvate dehydrogenase component E1 beta                                | Pdhb   |
| Met II        | OGFD3_RAT | Q5M843 | 2-oxoglutarate and iron-dependent oxygenase domain-containing protein 3 | Ogfod3 |
| Met I         | ORN_RAT   | Q5U1X1 | Oligoribonuclease mitochondrial                                         | Rexo2  |
| Met II        | OS9_RAT   | Q5RKH6 | Protein OS-9                                                            | Os9    |
| Met II        | OST48_RAT | Q641Y0 | Oligosaccharyl transferase 48 kDa subunit                               | Ddost  |
| Met I         | OTUB1_RAT | B2RYG6 | Ubiquitin thioesterase OTUB1                                            | Otub1  |
| Met II        | P2RX4_RAT | P51577 | P2X purinoceptor 4                                                      | P2rx4  |
| Met II        | P4K2B_RAT | Q5XIL2 | Phosphatidylinositol 4-kinase type 2-beta                               | Pi4k2b |
| Met II        | PABP1_RAT | Q9EPH8 | Polyadenylate-binding protein 1                                         | Pabpc1 |
| Met I         | PAIRB_RAT | Q6AXS5 | Plasminogen activator inhibitor 1 RNA-binding protein                   | Serbp1 |
| Met I         | PARK7_RAT | O88767 | Protein/nucleic acid deglycase DJ-1                                     | Park7  |
| Met II        | PBIP1_RAT | A2VD12 | Pre-B-cell leukemia transcription factor-interacting protein 1          | Pbxip1 |
| Met II        | PCAT2_RAT | P0C1Q3 | Lysophosphatidylcholine acyltransferase 2                               | Lpcat2 |
| Met I         | PCNA_RAT  | P04961 | Proliferating cell nuclear antigen                                      | Pcna   |
| Met II        | PDE3B_RAT | Q63085 | Cyclic GMP-inhibited phosphodiesterase B                                | Pde3b  |
| Met I; Met II | PDIA1_RAT | P04785 | Protein disulfide-isomerase                                             | P4hb   |
| Met I; Met II | PDIA3_RAT | P11598 | Protein disulfide-isomerase A3                                          | Pdia3  |
| Met I         | PDIA6_RAT | Q63081 | Protein disulfide-isomerase A6                                          | Pdia6  |
| Met I         | PEBP1_RAT | P31044 | Phosphatidylethanolamine-binding protein 1                              | Pebp1  |
| Met II        | PECA1_RAT | Q3SWT0 | Platelet endothelial cell adhesion molecule (Pecam1)                    | Pecam1 |
| Met I         | PGAM1_RAT | P25113 | Phosphoglycerate mutase 1                                               | Pgam1  |
| Met II        | PGFRB_RAT | Q05030 | Platelet-derived growth factor receptor beta                            | Pdgfrb |
| Met I         | PGH2_RAT  | P35355 | Prostaglandin G/H synthase 2                                            | Ptgs2  |
| Met I         | PGK1_RAT  | P16617 | Phosphoglycerate kinase 1                                               | Pgk1   |
| Met I; Met II | PGRC1_RAT | P70580 | Membrane-associated progesterone receptor component 1                   | Pgrmc1 |
| Met II        | PGRC2_RAT | Q5XIU9 | Membrane-associated progesterone receptor component 2                   | Pgrmc2 |
| Met I; Met II | PHB_RAT   | P67779 | Prohibitin                                                              | Phb    |
| Met I; Met II | PHB2_RAT  | Q5XIH7 | Prohibitin 2                                                            | Phb2   |
| Met II        | PHOCN_RAT | Q9QYW3 | MOB-like protein phocein                                                | Mob4   |
| Met II        | PIGS_RAT  | Q5XI31 | GPI transamidase component PIG-S                                        | Pigs   |
| Met II        | PLF4_RAT  | P06765 | Platelet factor 4                                                       | Pf4    |
| Met II        | PLP2_RAT  | Q6P742 | Proteolipid protein 2                                                   | Plp2   |
| Met I; Met II | PLS1_RAT  | P58195 | Phospholipid scramblase 1                                               | Plscr1 |
| Met II        | PLS3_RAT  | Q6QBQ4 | Phospholipid scramblase 3                                               | Plscr3 |
| Met II        | PORED_RAT | Q5RJM1 | 3-oxo-5-alpha-steroid 4-dehydrogenase 3                                 | Srd5a3 |

|               |            |        |                                                                         |           |
|---------------|------------|--------|-------------------------------------------------------------------------|-----------|
| Met II        | PP1A_RAT   | P62138 | Serine/threonine-protein phosphatase PP1-alpha catalytic subunit        | Ppp1ca    |
| Met I         | PP2AA_RAT  | P63331 | Serine/threonine-protein phosphatase 2A catalytic subunit alpha isoform | Ppp2ca    |
| Met I; Met II | PPIA_RAT   | P10111 | Peptidyl-prolyl cis-trans isomerase A                                   | Ppia      |
| Met I; Met II | PPIB_RAT   | P24368 | Peptidyl-prolyl cis-trans isomerase B                                   | Ppib      |
| Met I; Met II | PRAF3_RAT  | Q9ES40 | PRA1 family protein 3                                                   | Arl6ip5   |
| Met I; Met II | PRDX1_RAT  | Q63716 | Peroxiredoxin-1                                                         | Prdx1     |
| Met I         | PRDX2_RAT  | P35704 | Peroxiredoxin-2                                                         | Prdx2     |
| Met II        | PRDX3_RAT  | Q9Z0V6 | Thioredoxin-dependent peroxide reductase mitochondrial                  | Prdx3     |
| Met I; Met II | PROF1_RAT  | P62963 | Profilin-1                                                              | Pfn1      |
| Met II        | PSN1_RAT   | P97887 | Presenilin-1                                                            | Psen1     |
| Met II        | PSN2_RAT   | O88777 | Presenilin-2                                                            | Psen2     |
| Met II        | PTN1_RAT   | P20417 | Protein-tyrosine phosphatase 1B                                         | Ptpn1     |
| Met II        | PTPRC_RAT  | P04157 | Receptor-type tyrosine-protein phosphatase C (CD45)                     | Ptprc     |
| Met I         | PUR9_RAT   | O35567 | Bifunctional purine biosynthesis protein PURH                           | Atic      |
| Met I         | PYGL_RAT   | P09811 | Glycogen phosphorylase liver form                                       | Pygl      |
| Met II        | Q0R3W9_RAT | Q0R3W9 | GTPase, IMAP family member 1                                            | Gimap1    |
| Met II        | Q2I6B1_RAT | Q2I6B1 | V-type proton ATPase subunit A2                                         | Atp6v0a2  |
| Met I; Met II | Q2I6B2_RAT | Q2I6B2 | V-type proton ATPase subunit A1                                         | Atp6v0a1  |
| Met II        | Q2IBC7_RAT | Q2IBC7 | Hepatocyte growth factor receptor                                       | Met       |
| Met I; Met II | Q32PX6_RAT | Q32PX6 | Rho-related GTP-binding protein RhoG                                    | Rhog      |
| Met II        | Q3B7V5_RAT | Q3B7V5 | Ras-related protein Rab-2b                                              | Rab2b     |
| Met II        | Q3KRC3_RAT | Q3KRC3 | Signal recognition particle receptor alpha                              | Srpra     |
| Met II        | Q3MHS9_RAT | Q3MHS9 | Chaperonin-containing TCP1 subunit 6A                                   | Cct6a     |
| Met II        | Q497A2_RAT | Q497A2 | Solute carrier family 35 member B2                                      | Slc35b2   |
| Met I         | Q4G002_RAT | Q4G002 | Histocompatibility 2 T region locus 24                                  | RT1-T24-4 |
| Met I; Met II | Q4KM97_RAT | Q4KM97 | Tyrosine-protein kinase BLK                                             | Blk       |
| Met II        | Q4QQS6_RAT | Q4QQS6 | Dolichyl-phosphate beta-glucosyltransferase                             | Alg5      |
| Met II        | Q4QQV0_RAT | Q4QQV0 | Tubulin beta-6                                                          | Tubb6     |
| Met I; Met II | Q4V7D1_RAT | Q4V7D1 | Translocon-associated protein subunit alpha                             | Ssr1      |
| Met I; Met II | Q4V7D9_RAT | Q4V7D9 | Acid sphingomyelinase-like phosphodiesterase 3B                         | Smpdl3b   |
| Met II        | Q4V8N6_RAT | Q4V8N6 | Solute carrier organic anion transporter family member 2A1              | Slco4a1   |
| Met II        | Q52KJ9_RAT | Q52KJ9 | Thioredoxin-related transmembrane protein 1                             | Tmx1      |
| Met II        | Q5BJZ3_RAT | Q5BJZ3 | Nicotinamide nucleotide transhydrogenase                                | Nnt       |
| Met II        | Q5EAP4_RAT | Q5EAP4 | Guanine nucleotide binding protein alpha-14                             | Gna14     |
| Met II        | Q5FVC4_RAT | Q5FVC4 | DnaJ (Hsp40) homolog subfamily B member 12                              | Dnajb12   |
| Met I; Met II | Q5M7T6_RAT | Q5M7T6 | V-type proton ATPase subunit D 1                                        | Atp6v0d1  |
| Met I         | Q5M860_RAT | Q5M860 | Rho GDP dissociation inhibitor 2                                        | Arhgdib   |
| Met I         | Q5RJK5_RAT | Q5RJK5 | Chromobox 3                                                             | Cbx3      |

|               |            |        |                                                                                   |          |
|---------------|------------|--------|-----------------------------------------------------------------------------------|----------|
| Met II        | Q5RK10_RAT | Q5RK10 | 60S ribosomal protein L13a, isoform                                               | Rpl13a   |
| Met II        | Q5RKJ9_RAT | Q5RKJ9 | Ras-related protein Rab-10                                                        | Rab10    |
| Met I; Met II | Q5U1Y2_RAT | Q5U1Y2 | Ras-related C3 botulinum toxin substrate 2 (Rac2)                                 | Rac2     |
| Met II        | Q5U1Z9_RAT | Q5U1Z9 | Metaxin 2                                                                         | Mtx2     |
| Met II        | Q5U2Z8_RAT | Q5U2Z8 | Elongation of very long chain fatty acids protein 1                               | Elov11   |
| Met I         | Q5U362_RAT | Q5U362 | Annexin A4                                                                        | Anxa4    |
| Met I; Met II | Q5U3Z7_RAT | Q5U3Z7 | Serine hydroxymethyltransferase                                                   | Shmt2    |
| Met II        | Q5VLR5_RAT | Q5VLR5 | Endoplasmic reticulum resident protein 44                                         | Erp44    |
| Met II        | Q5XI04_RAT | Q5XI04 | Erythrocyte band 7 integral membrane protein                                      | Stom     |
| Met I; Met II | Q5XI34_RAT | Q5XI34 | Serine/threonine-protein phosphatase 2A 65 kDa regulatory subunit A alpha isoform | Ppp2r1a  |
| Met II        | Q5XI36_RAT | Q5XI36 | CD97                                                                              | Adgre5   |
| Met I         | Q5XI38_RAT | Q5XI38 | Lymphocyte cytosolic protein 1                                                    | Lcp1     |
| Met I         | Q5XI77_RAT | Q5XI77 | Annexin A11                                                                       | Anxa11   |
| Met II        | Q5XI86_RAT | Q5XI86 | Peptidyl-tRNA hydrolase 2                                                         | Ptrh2    |
| Met II        | Q5XIH3_RAT | Q5XIH3 | NADH dehydrogenase [ubiquinone] flavoprotein 1                                    | Ndufv1   |
| Met I         | Q5XIM7_RAT | Q5XIM7 | Lysine--tRNA ligase                                                               | Kars     |
| Met II        | Q5XIP2_RAT | Q5XIP2 | GPI-anchor transamidase                                                           | Pigk     |
| Met II        | Q5XIU4_RAT | Q5XIU4 | B-cell receptor-associated protein 29                                             | Bcap29   |
| Met I         | Q5XIV1_RAT | Q5XIV1 | Phosphoglycerate kinase 2                                                         | Pgk2     |
| Met I; Met II | Q63116_RAT | Q63116 | Mast/stem cell growth factor receptor                                             | Kit      |
| Met II        | Q63483_RAT | Q63483 | Ras-related protein Rab-38                                                        | Rab38    |
| Met II        | Q642E3_RAT | Q642E3 | CDK5 regulatory subunit-associated protein 3, isoform                             | Cdk5rap3 |
| Met II        | Q66H18_RAT | Q66H18 | Synaptophysin-like 1                                                              | Syp11    |
| Met I         | Q68FX4_RAT | Q68FX4 | Hematopoietic cell-specific LYN substrate 1 (hcls1)                               | Hcls1    |
| Met II        | Q6AXX5_RAT | Q6AXX5 | Retinol dehydrogenase 11                                                          | Rdh11    |
| Met II        | Q6AY18_RAT | Q6AY18 | GTP-binding protein SAR1a                                                         | Sar1a    |
| Met I; Met II | Q6AYD3_RAT | Q6AYD3 | Proliferation-associated protein 2G4                                              | Pa2g4    |
| Met I; Met II | Q6AYI1_RAT | Q6AYI1 | Probable ATP-dependent RNA helicase DDX5                                          | Ddx5     |
| Met II        | Q6AYM8_RAT | Q6AYM8 | Glycosylphosphatidylinositol anchor attachment 1                                  | Gpaa1    |
| Met II        | Q6AYQ9_RAT | Q6AYQ9 | Peptidyl-prolyl cis-trans isomerase C                                             | Ppic     |
| Met I; Met II | Q6IFU9_RAT | Q6IFU9 | keratin 16                                                                        | Krt16    |
| Met II        | Q6IFV6_RAT | Q6IFV6 | Keratin 35                                                                        | Krt35    |
| Met II        | Q6IFZ5_RAT | Q6IFZ5 | Keratin, type II cytoskeletal 2 oral                                              | Krt76    |
| Met II        | Q6IN24_RAT | Q6IN24 | Galectin-8                                                                        | Lgals8   |
| Met I         | Q6IN37_RAT | Q6IN37 | GM2 ganglioside activator                                                         | Gm2a     |
| Met II        | Q6IRF8_RAT | Q6IRF8 | V-type proton ATPase subunit S1                                                   | Atp6ap1  |
| Met I; Met II | Q6MGA3_RAT | Q6MGA3 | Antigen peptide transporter 2                                                     | Tap2     |
| Met II        | Q6MGB4_RAT | Q6MGB4 | H2-K region expressed gene 4, rat orthologue                                      | Slc39a7  |

|               |            |        |                                                      |              |
|---------------|------------|--------|------------------------------------------------------|--------------|
| Met I; Met II | Q6P3V8_RAT | Q6P3V8 | Eukaryotic initiation factor 4A-I                    | Eif4a1       |
| Met II        | Q6P3V9_RAT | Q6P3V9 | 60S ribosomal protein L4                             | Rpl4         |
| Met II        | Q6P503_RAT | Q6P503 | V-type proton ATPase subunit D                       | Atp6v1d      |
| Met I; Met II | Q6P685_RAT | Q6P685 | Eukaryotic translation initiation factor 2 subunit 2 | Eif2s2       |
| Met I         | Q6P6T6_RAT | Q6P6T6 | Cathepsin D                                          | Ctsd         |
| Met II        | Q6P9V1_RAT | Q6P9V1 | CD81 molecule                                        | Cd81         |
| Met II        | Q6PCU4_RAT | Q6PCU4 | Emerin                                               | Emd          |
| Met II        | Q6PDV6_RAT | Q6PDV6 | 40S ribosomal protein S14                            | LOC100911847 |
| Met I         | Q6TXF3_RAT | Q6TXF3 | Acyl-CoA-binding protein                             | Dbi          |
| Met I; Met II | Q76GL9_RAT | Q76GL9 | Neutral amino acid transporter A                     | Slc1a4       |
| Met I; Met II | Q78P65_RAT | Q78P65 | Rap2A-like protein                                   | Rap2a        |
| Met I         | Q7TP15_RAT | Q7TP15 | S-methyl-5'-thioadenosine phosphorylase              | Mtap         |
| Met II        | Q7TP42_RAT | Q7TP42 | Translocation protein SEC62                          | Sec62        |
| Met II        | Q7TQ86_RAT | Q7TQ86 | Ac1158                                               | Rsl1d1       |
| Met II        | Q8SEZ5_RAT | Q8SEZ5 | Cytochrome c oxidase subunit 2                       | Mt-co2       |
| Met II        | Q99JC6_RAT | Q99JC6 | Tapasin                                              | Tapbp        |
| Met I         | Q9JKB7_RAT | Q9JKB7 | Guanine deaminase                                    | Gda          |
| Met I         | Q9QX80_RAT | Q9QX80 | Heterogeneous nuclear ribonucleoprotein A/B          | Hnrnpab      |
| Met II        | Q9Z1J7_RAT | Q9Z1J7 | Amino acid transporter                               | Slc1a5       |
| Met I; Met II | QCR1_RAT   | Q68FY0 | Cytochrome b-c1 complex subunit 1 mitochondrial      | Uqcrc1       |
| Met I; Met II | QCR2_RAT   | P32551 | Cytochrome b-c1 complex subunit 2 mitochondrial      | Uqcrc2       |
| Met I; Met II | QCR6_RAT   | Q5M9I5 | Cytochrome b-c1 complex subunit 6 mitochondrial      | Uqcrh        |
| Met II        | R9PXR4_RAT | R9PXR4 | Mitochondrial import receptor subunit TOM70          | Tomm70       |
| Met I         | R9PXR7_RAT | B2GV92 | Prostaglandin E synthase 3                           | Ptges3       |
| Met I         | R9PXU4_RAT | R9PXU4 | Thioredoxin reductase 1 cytoplasmic                  | Txnrd1       |
| Met II        | RAB14_RAT  | P61107 | Ras-related protein Rab-14                           | Rab14        |
| Met I; Met II | RAB15_RAT  | P35289 | Ras-related protein Rab-15                           | Rab15        |
| Met II        | RAB18_RAT  | Q5EB77 | Ras-related protein Rab-18                           | Rab18        |
| Met I; Met II | RAB1A_RAT  | Q6NYB7 | Ras-related protein Rab-1a                           | Rab1A        |
| Met II        | RAB21_RAT  | Q6AXT5 | Ras-related protein Rab-21                           | Rab21        |
| Met I; Met II | RAB2A_RAT  | P05712 | Ras-related protein Rab-2a                           | Rab2a        |
| Met I; Met II | RAB35_RAT  | Q5U316 | Ras-related protein Rab-35                           | Rab35        |
| Met II        | RAB3A_RAT  | P63012 | Ras-related protein Rab-3a                           | Rab3a        |
| Met II        | RAB3D_RAT  | Q63942 | Ras-related protein Rab-3d                           | Rab3d        |
| Met II        | RAB43_RAT  | Q53B90 | Ras-related protein Rab-43                           | Rab43        |
| Met I; Met II | RAB4B_RAT  | P51146 | Ras-related protein Rab-4b                           | Rab4b        |
| Met II        | RAB6A_RAT  | Q9WVB1 | Ras-related protein Rab-6a                           | Rab6a        |
| Met I; Met II | RAB7A_RAT  | P09527 | Ras-related protein Rab-7a                           | Rab7a        |

|               |           |        |                                                   |         |
|---------------|-----------|--------|---------------------------------------------------|---------|
| Met II        | RAB8A_RAT | P35280 | Ras-related protein Rab-8a                        | Rab8a   |
| Met I; Met II | RAB8B_RAT | P70550 | Ras-related protein Rab-8b                        | Rab8b   |
| Met II        | RAB9A_RAT | Q99P75 | Ras-related protein Rab-9a                        | Rab9a   |
| Met I; Met II | RAC1_RAT  | Q6RUV5 | Ras-related C3 botulinum toxin substrate 1 (Rac1) | Rac1    |
| Met I         | RACK1_RAT | P63245 | Receptor of activated protein C kinase 1 (RACK1)  | Rack1   |
| Met II        | RALA_RAT  | P63322 | Ras-related protein Ral-A                         | Rala    |
| Met I         | RAN_RAT   | P62828 | GTP-binding nuclear protein Ran                   | Ran     |
| Met I; Met II | RAP1A_RAT | P62836 | Ras-related protein Rap-1a                        | Rap1a   |
| Met I; Met II | RAP1B_RAT | Q62636 | Ras-related protein Rap-1b                        | Rap1b   |
| Met I; Met II | RAP2B_RAT | P61227 | Ras-related protein Rap-2b                        | Rap2b   |
| Met II        | RASH_RAT  | P20171 | GTPase HRas                                       | Hras    |
| Met II        | RASK_RAT  | P08644 | GTPase KRas                                       | Kras    |
| Met II        | RASN_RAT  | Q04970 | GTPase NRas                                       | Nras    |
| Met I; Met II | RB11B_RAT | O35509 | Ras-related protein Rab-11b                       | Rab11b  |
| Met II        | RB27A_RAT | P23640 | Ras-related protein Rab-27a                       | Rab27a  |
| Met II        | RB27B_RAT | Q99P74 | Ras-related protein Rab-27b                       | Rab27b  |
| Met II        | REN1_RAT  | Q6AXS4 | Renin receptor                                    | Atp6ap2 |
| Met II        | RER1_RAT  | Q498C8 | Protein RER1                                      | Rer1    |
| Met I; Met II | RGS19_RAT | O70521 | Regulator of G-protein signaling 19               | Rgs19   |
| Met II        | RHBL4_RAT | Q4V8F3 | Rhomboid-related protein 4                        | Rhbdd1  |
| Met I; Met II | RHOA_RAT  | P61589 | Transforming protein RhoA                         | Rhoa    |
| Met II        | RHOB_RAT  | P62747 | Rho-related GTP-binding protein RhoB              | Rhob    |
| Met II        | RL10_RAT  | Q6PDV7 | 60S ribosomal protein L10                         | Rpl10   |
| Met I; Met II | RL10A_RAT | P62907 | 60S ribosomal protein L10a                        | Rpl10a  |
| Met II        | RL11_RAT  | P62914 | 60S ribosomal protein L11                         | Rpl11   |
| Met II        | RL12_RAT  | P23358 | 60S ribosomal protein L12                         | Rpl12   |
| Met II        | RL13A_RAT | P35427 | 60S ribosomal protein L13a                        | Rpl13a  |
| Met II        | RL14_RAT  | Q63507 | 60S ribosomal protein L14                         | Rpl14   |
| Met II        | RL17_RAT  | P24049 | 60S ribosomal protein L17                         | Rpl17   |
| Met II        | RL18_RAT  | P12001 | 60S ribosomal protein L18                         | Rpl18   |
| Met II        | RL18A_RAT | P62718 | 60S ribosomal protein L18a                        | Rpl18a  |
| Met II        | RL19_RAT  | P84100 | 60S ribosomal protein L19                         | Rpl19   |
| Met II        | RL23_RAT  | P62832 | 60S ribosomal protein L23                         | Rpl23   |
| Met II        | RL24_RAT  | P83732 | 60S ribosomal protein L24                         | Rpl24   |
| Met II        | RL3_RAT   | P21531 | 60S ribosomal protein L3                          | Rpl3    |
| Met I; Met II | RL30_RAT  | P62890 | 60S ribosomal protein L30                         | Rpl30   |
| Met I; Met II | RL40_RAT  | P62986 | Ubiquitin-60S ribosomal protein L40               | Uba52   |
| Met I         | RL5_RAT   | P09895 | 60S ribosomal protein L5                          | Rpl5    |

|               |           |        |                                                                         |         |
|---------------|-----------|--------|-------------------------------------------------------------------------|---------|
| Met I; Met II | RL7_RAT   | P05426 | 60S ribosomal protein L7                                                | Rpl7    |
| Met II        | RLA0_RAT  | P19945 | 60S acidic ribosomal protein P0                                         | Rplp0   |
| Met I; Met II | RLA1_RAT  | P19944 | 60S acidic ribosomal protein P1                                         | Rplp1   |
| Met I         | RLA2_RAT  | P02401 | 60S acidic ribosomal protein P2                                         | Rplp2   |
| Met II        | RMD3_RAT  | Q66H15 | Regulator of microtubule dynamics protein 3                             | Rmdn3   |
| Met I         | ROA3_RAT  | Q6URK4 | Heterogeneous nuclear ribonucleoprotein A3                              | Hnrnpa3 |
| Met I         | RPN1_RAT  | P07153 | Dolichyl-diphosphooligosaccharide protein glycosyltransferase subunit 1 | Rpn1    |
| Met I; Met II | RPN2_RAT  | P25235 | Dolichyl-diphosphooligosaccharide protein glycosyltransferase subunit 2 | Rpn2    |
| Met II        | RRAGA_RAT | Q63486 | Ras-related GTP-binding protein A (Rag A)                               | Rraga   |
| Met II        | RS11_RAT  | P62282 | 40S ribosomal protein S11                                               | Rps11   |
| Met II        | RS13_RAT  | P62278 | 40S ribosomal protein S13                                               | Rps13   |
| Met II        | RS15A_RAT | P62246 | 40S ribosomal protein S15a                                              | Rps15a  |
| Met II        | RS16_RAT  | P62250 | 40S ribosomal protein S16                                               | Rps16   |
| Met I         | RS19_RAT  | P17074 | 40S ribosomal protein S19                                               | Rps19   |
| Met II        | RS27A_RAT | P62982 | Ubiquitin-40S ribosomal protein S27a                                    | Rps27a  |
| Met I; Met II | RS28_RAT  | P62859 | 40S ribosomal protein S28                                               | Rps28   |
| Met I; Met II | RS3_RAT   | P62909 | 40S ribosomal protein S3                                                | Rps3    |
| Met II        | RS3A_RAT  | P49242 | 40S ribosomal protein S3a                                               | Rps3a   |
| Met II        | RS4X_RAT  | P62703 | 40S ribosomal protein S4, X isoform                                     | Rps4x   |
| Met I; Met II | RS7_RAT   | P62083 | 40S ribosomal protein S7                                                | Rps7    |
| Met I; Met II | RS8_RAT   | P62243 | 40S ribosomal protein S8                                                | Rps8    |
| Met I; Met II | RSSA_RAT  | P38983 | 40S ribosomal protein SA                                                | Rpsa    |
| Met I; Met II | RTN4_RAT  | Q9JK11 | Reticulon-4                                                             | Rtn4    |
| Met I; Met II | S38A2_RAT | Q9JHE5 | Sodium-coupled neutral amino acid transporter 2                         | Slc38a2 |
| Met II        | S61A1_RAT | P61621 | SEC61 alpha-1                                                           | Sec61a1 |
| Met II        | SAC1_RAT  | Q9ES21 | Phosphatidylinositide phosphatase SAC1                                  | Sacm1l  |
| Met I         | SAE1_RAT  | Q6AXQ0 | SUMO-activating enzyme subunit 1                                        | Sae1    |
| Met II        | SAM50_RAT | Q6AXV4 | Sorting and assembly machinery component 50 homolog                     | Samm50  |
| Met I; Met II | SAP_RAT   | P10960 | Prosaposin                                                              | Psap    |
| Met II        | SARAF_RAT | Q6AYN2 | Store-operated calcium entry-associated regulatory factor (SARAF)       | Saraf   |
| Met II        | SC11A_RAT | P42667 | SEC11 homolog A                                                         | Sec11a  |
| Met II        | SC11C_RAT | Q9WTR7 | SEC11 homolog C                                                         | Sec11c  |
| Met I; Met II | SC22B_RAT | Q4KM74 | Vesicle-trafficking protein SEC22b                                      | Sec22b  |
| Met II        | SCFD1_RAT | Q62991 | Syntaxin-binding protein 1-like 2                                       | Scfd1   |
| Met II        | SCRB2_RAT | P27615 | Lysosome membrane protein 2 (CD36)                                      | Scarb2  |
| Met II        | SELT_RAT  | Q1H5H1 | Thioredoxin reductase-like selenoprotein T                              | Selenot |
| Met I         | SEPT2_RAT | Q91Y81 | Septin-2                                                                | Sept2   |
| Met I         | SERA_RAT  | O08651 | D-3-phosphoglycerate dehydrogenase                                      | Phgdh   |

|               |           |        |                                                     |          |
|---------------|-----------|--------|-----------------------------------------------------|----------|
| Met I         | SET_RAT   | Q63945 | Protein SET                                         | Set      |
| Met I; Met II | SFXN1_RAT | Q63965 | Sideroflexin-1                                      | Sfxn1    |
| Met II        | SGPL1_RAT | Q8CHN6 | Sphingosine-1-phosphate lyase 1                     | Sgpl1    |
| Met II        | SIA4C_RAT | P61131 | Beta-galactoside alpha-2,3-sialyltransferase 4      | St3gal4  |
| Met I; Met II | SNAA_RAT  | P54921 | Alpha-soluble NSF attachment protein (SNAP-alpha)   | Napa     |
| Met I; Met II | SND1_RAT  | Q66X93 | Staphylococcal nuclease domain-containing protein 1 | Snd1     |
| Met II        | SNG1_RAT  | Q62876 | Synaptogyrin-1                                      | Syngr1   |
| Met II        | SNG2_RAT  | O54980 | Synaptogyrin-2                                      | Syngr2   |
| Met II        | SNP23_RAT | O70377 | Synaptosomal-associated protein 23 (SNAP-23)        | Snap23   |
| Met II        | SO4A1_RAT | Q99N01 | Organic anion-transporting polypeptide E            | Slco4a1  |
| Met I         | SODC_RAT  | P07632 | Superoxide dismutase [Cu-Zn]                        | Sod1     |
| Met II        | SPNS1_RAT | Q2YDU8 | Protein spinster homolog 1                          | Spns1    |
| Met II        | SQSTM_RAT | O08623 | Sequestosome-1                                      | Sqstm1   |
| Met II        | SRPRB_RAT | Q4FZX7 | Signal recognition particle receptor beta           | Srprb    |
| Met I         | SRSF2_RAT | Q6PDU1 | Serine/arginine-rich splicing factor 2              | Srsf2    |
| Met II        | SSRD_RAT  | Q07984 | Translocon-associated protein subunit delta         | Ssr4     |
| Met II        | STIM1_RAT | P84903 | Stromal interaction molecule 1 (STIM1)              | Stim1    |
| Met II        | STML2_RAT | Q4FZT0 | Stomatin-like protein 2                             | Stoml2   |
| Met II        | STRN3_RAT | P58405 | Striatin-3                                          | Strn3    |
| Met I; Met II | STX12_RAT | G3V7P1 | Syntaxin-12                                         | Stx12    |
| Met II        | STX3_RAT  | Q08849 | Syntaxin-3                                          | Stx3     |
| Met II        | STX5_RAT  | Q08851 | Syntaxin-5                                          | Stx5     |
| Met II        | STX6_RAT  | Q63635 | Syntaxin-6                                          | Stx6     |
| Met II        | STX7_RAT  | O70257 | Syntaxin-7                                          | Stx7     |
| Met II        | STX8_RAT  | Q9Z2Q7 | Syntaxin-8                                          | Stx8     |
| Met II        | STXB2_RAT | Q62753 | Syntaxin-binding protein 2                          | Stxbp2   |
| Met II        | STXB5_RAT | Q9WU70 | Syntaxin-binding protein 5                          | Stxbp5   |
| Met I         | SYAC_RAT  | P50475 | Alanine--tRNA ligase cytoplasmic                    | Aars     |
| Met I         | SYG_RAT   | Q5I0G4 | Glycine--tRNA ligase                                | Gars     |
| Met I         | SYSC_RAT  | Q6P799 | Serine--tRNA ligase cytoplasmic                     | Sars     |
| Met II        | SYVC_RAT  | Q04462 | Valine--tRNA ligase                                 | Vars     |
| Met I         | SYYC_RAT  | Q4KM49 | Tyrosine--tRNA ligase cytoplasmic                   | Yars     |
| Met II        | T106B_RAT | Q6AYA5 | Transmembrane protein 106 B                         | Tmem106b |
| Met II        | T120A_RAT | Q5HZE2 | Transmembrane protein 120 A                         | Tmem120a |
| Met I         | TAGL2_RAT | Q5XFX0 | Transgelin-2                                        | Tagln2   |
| Met II        | TAP1_RAT  | P36370 | Antigen peptide transporter 1                       | Tap1     |
| Met II        | TAXB1_RAT | Q66HA4 | Tax1-binding protein 1 homolog                      | Tax1bp1  |
| Met I         | TBA1A_RAT | P68370 | Tubulin alpha-1A                                    | Tuba1a   |

|               |           |        |                                                             |          |
|---------------|-----------|--------|-------------------------------------------------------------|----------|
| Met II        | TBA1B_RAT | Q6P9V9 | Tubulin alpha-1B                                            | Tuba1b   |
| Met I; Met II | TBA1C_RAT | Q6AYZ1 | Tubulin alpha-1C                                            | Tuba1c   |
| Met I; Met II | TBA4A_RAT | Q5XIF6 | Tubulin alpha-4A                                            | Tuba4a   |
| Met II        | TBA8_RAT  | Q6AY56 | Tubulin alpha-8                                             | Tuba8    |
| Met I         | TBB2A_RAT | P85108 | Tubulin beta-2A                                             | Tubb2a   |
| Met I         | TBB2B_RAT | Q3KRE8 | Tubulin beta-2B                                             | Tubb2b   |
| Met I         | TBB3_RAT  | Q4QRB4 | Tubulin beta-3                                              | Tubb3    |
| Met I; Met II | TBB4B_RAT | Q6P9T8 | Tubulin beta-4B                                             | Tubb4b   |
| Met I; Met II | TBB5_RAT  | P69897 | Tubulin beta-5                                              | Tubb5    |
| Met I         | TCP4_RAT  | Q63396 | Activated RNA polymerase II transcriptional coactivator p15 | Sub1     |
| Met II        | TCPB_RAT  | Q5XIM9 | T-complex protein 1 beta                                    | Cct2     |
| Met II        | TCPE_RAT  | Q68FQ0 | T-complex protein 1 epsilon                                 | Cct5     |
| Met II        | TECR_RAT  | Q64232 | Very-long-chain enoyl-CoA reductase                         | Tecr     |
| Met I; Met II | TERA_RAT  | P46462 | Transitional endoplasmic reticulum ATPase                   | Vcp      |
| Met II        | TGON3_RAT | P19814 | Trans-Golgi network integral membrane protein TGN38         | Ttgn1    |
| Met I         | THIO_RAT  | P11232 | Thioredoxin                                                 | Txn      |
| Met I; Met II | THY1_RAT  | P01830 | Thy-1 membrane glycoprotein                                 | Thy1     |
| Met I; Met II | TKT_RAT   | P50137 | Transketolase                                               | Tkt      |
| Met II        | TM109_RAT | Q6AYQ4 | Transmembrane protein 109                                   | Tmem109  |
| Met I; Met II | TM165_RAT | Q4V899 | Transmembrane protein 165                                   | Tmem165  |
| Met II        | TM168_RAT | Q5PQM0 | Transmembrane protein 168                                   | Tmem168  |
| Met II        | TM38B_RAT | Q68FV1 | Trimeric intracellular cation channel type B (TRIC-B)       | Tmem38b  |
| Met II        | TM55A_RAT | Q4V888 | Type 2 phosphatidylinositol 4,5-bisphosphate 4-phosphatase  | Pip4p2   |
| Met II        | TM7S3_RAT | Q5FVF4 | Transmembrane 7 superfamily member 3                        | Tm7sf3   |
| Met II        | TM9S1_RAT | Q66HF2 | Transmembrane 9 superfamily member 1                        | Tm9sf1   |
| Met II        | TM9S2_RAT | Q66HG5 | Transmembrane 9 superfamily member 2                        | Tm9sf2   |
| Met II        | TM9S4_RAT | Q4KLL4 | Transmembrane 9 superfamily member 4                        | Tm9sf4   |
| Met II        | TMCO1_RAT | Q5I0H4 | Calcium load-activated calcium channel (CLAC channel)       | Tmco1    |
| Met II        | TMED1_RAT | Q5BK85 | Transmembrane emp24 domain-containing protein 1             | Tmed1    |
| Met II        | TMED2_RAT | Q63524 | Transmembrane emp24 domain-containing protein 2             | Tmed2    |
| Met II        | TMED5_RAT | Q6AXN3 | Transmembrane emp24 domain-containing protein 5             | Tmed5    |
| Met I; Met II | TMED7_RAT | D3ZTX0 | Transmembrane emp24 domain-containing protein 7             | Tmed7    |
| Met I; Met II | TMED9_RAT | Q5I0E7 | Transmembrane emp24 domain-containing protein 9             | Tmed9    |
| Met I; Met II | TMEDA_RAT | Q63584 | Transmembrane emp24 domain-containing protein 10            | Tmed10   |
| Met II        | TMM43_RAT | Q5XIP9 | Transmembrane protein 43 (Protein LUMA)                     | Tmem43   |
| Met II        | TMX2_RAT  | Q5XIK2 | Thioredoxin-related transmembrane protein 2                 | Tmx2     |
| Met II        | TOIP1_RAT | Q5PQX1 | Torsin-1A-interacting protein 1                             | Tor1aip1 |
| Met II        | TOM22_RAT | Q75Q41 | Mitochondrial import receptor subunit TOM22 homolog         | Tomm22   |



|               |           |        |                                                                          |          |
|---------------|-----------|--------|--------------------------------------------------------------------------|----------|
| Met I         | TPIS_RAT  | P48500 | Triosephosphate isomerase                                                | Tpi1     |
| Met I; Met II | TPM3_RAT  | Q63610 | Tropomyosin alpha-3                                                      | Tpm3     |
| Met I; Met II | TPM4_RAT  | P09495 | Tropomyosin alpha-4                                                      | Tpm4     |
| Met II        | TRAM1_RAT | Q5XI41 | Translocating chain-associated membrane protein 1                        | Tram1    |
| Met I; Met II | TRPV2_RAT | Q9WUD2 | Transient receptor potential cation channel subfamily V member 2 (TRPV2) | Trpv2    |
| Met I; Met II | TRY1_RAT  | P00762 | Anionic trypsin-1                                                        | Prss1    |
| Met I         | TSH3_RAT  | D3ZKB9 | Teashirt homolog 3                                                       | Tshz3    |
| Met I         | TXNL1_RAT | Q920J4 | Thioredoxin-like protein 1                                               | Txn1l    |
| Met II        | TXTP_RAT  | P32089 | Citrate transport protein                                                | Slc25a1  |
| Met I         | TYB4_RAT  | P62329 | Thymosin beta-4                                                          | Tmsb4x   |
| Met I         | UBA1_RAT  | Q5U300 | Ubiquitin-like modifier-activating enzyme 1                              | Uba1     |
| Met I         | UBE2N_RAT | Q9EQX9 | Ubiquitin-conjugating enzyme E2 N                                        | Ube2n    |
| Met II        | UBXN4_RAT | Q5HZY0 | Erasin                                                                   | Ubxn4    |
| Met II        | UCRI_RAT  | P20788 | Cytochrome b-c1 complex subunit Rieske                                   | Uqcrfs1  |
| Met II        | UFL1_RAT  | B2GV24 | E3 UFM1-protein ligase 1                                                 | Ufl1     |
| Met I; Met II | VAMP3_RAT | P63025 | VAMP3                                                                    | Vamp3    |
| Met II        | VAMP5_RAT | Q9Z2J5 | VAMP5                                                                    | Vamp5    |
| Met II        | VAMP7_RAT | Q9JHW5 | VAMP7                                                                    | Vamp7    |
| Met II        | VAPA_RAT  | Q9Z270 | VAMP-associated protein A                                                | Vapa     |
| Met II        | VAPB_RAT  | Q9Z269 | VAMP-associated protein B                                                | Vapb     |
| Met I         | VAT1_RAT  | Q3MIE4 | Synaptic vesicle membrane protein VAT-1 homolog                          | Vat1     |
| Met I; Met II | VATB2_RAT | P62815 | V-type proton ATPase subunit B                                           | Atp6v1b2 |
| Met II        | VATE1_RAT | Q6PCU2 | V-type proton ATPase subunit E 1                                         | Atp6v1e1 |
| Met II        | VATF_RAT  | P50408 | V-type proton ATPase subunit F                                           | Atp6v1f  |
| Met I; Met II | VDAC1_RAT | Q9Z2L0 | Voltage-dependent anion-selective channel protein 1                      | Vdac1    |
| Met I; Met II | VDAC2_RAT | P81155 | Voltage-dependent anion-selective channel protein 2                      | Vdac2    |
| Met II        | VDAC3_RAT | Q9R1Z0 | Voltage-dependent anion-selective channel protein 3                      | Vdac3    |
| Met II        | VEZA_RAT  | Q5XI52 | Vezatin                                                                  | Vezt     |
| Met II        | VGFR2_RAT | O08775 | Vascular endothelial growth factor receptor 2                            | Kdr      |
| Met I         | VIME_RAT  | P31000 | Vimentin                                                                 | Vim      |
| Met II        | VKOR1_RAT | Q6TEK4 | Vitamin K epoxide reductase complex subunit 1                            | Vkorc1   |
| Met II        | VMAT2_RAT | Q01827 | Vesicular amine transporter 2                                            | Slc18a2  |
| Met II        | VMP1_RAT  | Q91ZQ0 | Vacuole membrane protein 1                                               | Vmp1     |
| Met I; Met II | VWA5A_RAT | Q75WE7 | Von Willebrand factor A domain-containing protein 5A                     | Vwa5a    |
| Met I         | YBOX3_RAT | Q62764 | Y-box-binding protein 3                                                  | Ybx3     |
| Met II        | YES_RAT   | F1LM93 | Tyrosine-protein kinase Yes                                              | Yes1     |
| Met II        | YIF1B_RAT | Q6PEC3 | Protein YIF1B                                                            | Yif1b    |
| Met II        | YIPF4_RAT | Q5M7T4 | Protein YIPF4                                                            | Yipf4    |

|               |           |        |                                             |         |
|---------------|-----------|--------|---------------------------------------------|---------|
| Met II        | YIPF5_RAT | Q5XID0 | Protein YIPF5                               | Yipf5   |
| Met I; Met II | YMEL1_RAT | Q925S8 | ATP-dependent zinc metalloprotease YME1L1   | Yme1l1  |
| Met II        | ZNT1_RAT  | Q62720 | Zinc transporter 1                          | Slc30a1 |
| Met II        | ZW10_RAT  | Q4V8C2 | Centromere/kinetochore protein zw10 homolog | Zw10    |

| Header line description of worksheets |                                                                          |
|---------------------------------------|--------------------------------------------------------------------------|
| Method                                | Protein identification with which Method                                 |
| Protein ID                            | Protein identification of UniProt                                        |
| Protein accession                     | Protein accession number of UniProt                                      |
| Protein description                   | Protein functional description                                           |
| Gene name                             | Indicates the name of the gene that code for the protein sequence        |
| MW [kDa]                              | Protein molecular weight ,unit [kDa]                                     |
| Score AVG                             | A simple rule to be used to judge whether a result is significant or not |
| Peptides AVG                          | Number of peptides whitch spectrum hit                                   |
