# Supplementary material for: Proteomic Analysis of Lipid Rafts from RBL-2H3 Mast Cells
Source: MDPI journal article supplement (doi:10.3390/ijms20163904), 2019-08-11
Supplement: s1 [file s1]

**Supplementary Table 5. Mast cell lipid raft proteins analyzed by RafProtV2 database**

| Method        | Protein ID | Protein accession | Protein description                                            | Gene name | Experimental Evidence | Number of citation |
|---------------|------------|-------------------|----------------------------------------------------------------|-----------|-----------------------|--------------------|
| Met I; Met II | 1433B_RAT  | P35213            | 14-3-3 protein beta/alpha                                      | Ywhab     | H (1) M (1) R (1)     | 45                 |
| Met I; Met II | 1433E_RAT  | P62260            | 14-3-3 protein epsilon                                         | Ywhae     | H (1) M (1) R (1)     | 57                 |
| Met I; Met II | 1433F_RAT  | P68511            | 14-3-3 protein eta                                             | Ywhah     | H (1) M (1) R (1)     | 29                 |
| Met I; Met II | 1433G_RAT  | P61983            | 14-3-3 protein gamma                                           | Ywhag     | H (1) M (1) R (1)     | 50                 |
| Met I; Met II | 1433T_RAT  | P68255            | 14-3-3 protein theta                                           | Ywhaq     | H (1) M (1) R (1)     | 43                 |
| Met I; Met II | 1433Z_RAT  | P63102            | 14-3-3 protein zeta/delta                                      | Ywhaz     | H (1) M (1) R (1)     | 77                 |
| Met I; Met II | 4F2_RAT    | Q794F9            | 4F2 cell-surface antigen heavy chain                           | Slc3a2    | H (1) M (1) R (1)     | 61                 |
| Met I         | 6PGD_RAT   | P85968            | 6-phosphogluconate dehydrogenase decarboxylating               | Pgd       | H (0)                 | 5                  |
| Met I         | 6PGL_RAT   | P85971            | 6-phosphogluconolactonase                                      | Pgl       | H (0)                 | 6                  |
| Met II        | A0JN29_RAT | A0JN29            | Lunapark ER junction formation factor                          | Ln timer  | H (0) M (0)           | 8                  |
| Met I; Met II | A0JN30_RAT | A0JN30            | Canopy 2 homolog                                               | Cnpy2     | H (1)                 | 3                  |
| Met II        | A1L1J8_RAT | A1L1J8            | Ras-related protein Rab-5b                                     | Rab5b     | H (3) M (3)           | 23                 |
| Met II        | A1L1L6_RAT | A1L1L6            | Mitochondrial Rho GTPase 1                                     | Rhot1     | H (1)                 | 4                  |
| Met I; Met II | A3RLA8_RAT | A3RLA8            | Low affinity immunoglobulin gamma Fc region receptor II        | Fcgr2b    | M (0)                 | 1                  |
| Met I         | AATC_RAT   | P13221            | Aspartate aminotransferase cytoplasmic                         | Got1      | H (0) M (1) R (1)     | 9                  |
| Met I; Met II | AATM_RAT   | P00507            | Aspartate aminotransferase mitochondrial                       | Got2      | H (1) M (1) R (1)     | 14                 |
| Met II        | ABCB6_RAT  | O70595            | ATP-binding cassette sub-family B member 6                     | Abcb6     | H (1) M (1) R (1)     | 13                 |
| Met II        | ABCB8_RAT  | Q5RKI8            | ATP-binding cassette sub-family B member 8                     | Abcb8     | R (1)                 | 4                  |
| Met I         | ABCF1_RAT  | Q6MG08            | ATP-binding cassette sub-family F member 1                     | Abcf1     | H (0) M (0)           | 5                  |
| Met II        | ABHGA_RAT  | Q6MG55            | Abhydrolase domain containing 16A                              | Abhd16a   | H (1) R (1)           | 5                  |
| Met I         | ACON_RAT   | Q9ER34            | Aconitate hydratase mitochondrial                              | Aco2      | H (1) M (1) R (1)     | 20                 |
| Met II        | ACSL3_RAT  | Q63151            | Long chain fatty acid CoA ligase 3                             | Acsl3     | H (1)                 | 11                 |
| Met II        | ACSL5_RAT  | O88813            | Long chain fatty acid CoA ligase 5                             | Acsl5     | H (1) M (1) R (1)     | 6                  |
| Met I; Met II | ACTB_RAT   | P60711            | Actin cytoplasmic 1                                            | Actb      | H (3) M (3) R (3)     | 90                 |
| Met I         | ACTH_RAT   | P63269            | Actin gamma-enteric smooth muscle                              | Actg2     | H (0) M (0)           | 20                 |
| Met I         | ADA_RAT    | Q920P6            | Adenosine deaminase                                            | Ada       | H (0)                 | 11                 |
| Met II        | ADA15_RAT  | Q9QYV0            | Disintegrin and metalloproteinase domain-containing protein 15 | Adam15    | H (0) M (0)           | 11                 |
| Met I; Met II | ADT1_RAT   | Q05962            | ADP/ATP translocase 1                                          | Slc25a4   | H (3) M (3) R (3)     | 48                 |
| Met I; Met II | ADT2_RAT   | Q09073            | ADP/ATP translocase 2                                          | Slc25a5   | H (1) M (1) R (1)     | 63                 |
| Met II        | AIFM1_RAT  | Q9JM53            | Apoptosis-inducing factor 1                                    | Aifm1     | H (1) M (1) R (1)     | 12                 |
| Met I         | AK1A1_RAT  | P51635            | Alcohol dehydrogenase [NADP(+)]                                | Akr1a1    | H (0)                 | 3                  |
| Met II        | AKAP1_RAT  | O88884            | A-kinase anchor protein 1, mitochondrial                       | Akap1     | H (1) R (1)           | 9                  |
| Met I; Met II | ALDOA_RAT  | P05065            | Fructose-bisphosphate aldolase A                               | Aldoa     | H (1) M (1) R (1)     | 56                 |
| Met I         | ALDR_RAT   | P07943            | Aldose reductase                                               | Akr1b1    | H (0) M (1) R (1)     | 8                  |
| Met I         | AN32B_RAT  | Q9EST6            | Acidic leucine-rich nuclear phosphoprotein 32 family member B  | Anp32b    | H (0)                 | 2                  |
| Met I         | AN32E_RAT  | Q5XIE0            | Acidic leucine-rich nuclear phosphoprotein 32 family member E  | Anp32e    | H (0)                 | 1                  |
| Met I; Met II | ANXA1_RAT  | P07150            | Annexin A1                                                     | Anxa1     | H (3) M (3) R (3)     | 44                 |
| Met I         | ANXA2_RAT  | Q07936            | Annexin A2                                                     | Anxa2     | H (1) M (3) R (3)     | 86                 |
| Met I         | ANXA5_RAT  | P14668            | Annexin A5                                                     | Anxa5     | H (3) M (3) R (3)     | 49                 |
| Met II        | APAF_RAT   | Q9EPV5            | Apoptotic protease-activating factor 1                         | Apaf1     | M (0)                 | 1                  |

|               |            |        |                                                              |          |                   |    |
|---------------|------------|--------|--------------------------------------------------------------|----------|-------------------|----|
| Met I; Met II | ARL8B_RAT  | Q66HA6 | ADP-ribosylation factor-like protein 8B                      | Arl8b    | H (1) M (1) R (1) | 36 |
| Met II        | ARM10_RAT  | B1WBW4 | Armadillo repeat-containing protein 10                       | Armcl10  | H (1) M (1) R (1) | 12 |
| Met II        | ARMX3_RAT  | Q5XID7 | Armadillo repeat-containing X-linked protein 3               | Armxc3   | H (1)             | 3  |
| Met I; Met II | AT1A1_RAT  | P06685 | Sodium/potassium-transporting ATPase subunit alpha-1         | Atp1a1   | H (1) M (1) R (1) | 89 |
| Met I         | AT1A2_RAT  | P06686 | Sodium/potassium-transporting ATPase subunit alpha-2         | Atp1a2   | H (1) M (1) R (1) | 17 |
| Met I         | AT1A3_RAT  | P06687 | Sodium/potassium-transporting ATPase subunit alpha-3         | Atp1a3   | H (1) M (1) R (1) | 22 |
| Met I; Met II | AT1A4_RAT  | Q64541 | Sodium/potassium-transporting ATPase subunit alpha-4         | Atp1a4   | H (0) M (0)       | 7  |
| Met I; Met II | AT1B3_RAT  | Q63377 | Sodium/potassium-transporting ATPase subunit beta-3          | Atp1b3   | H (1) M (1) R (1) | 41 |
| Met II        | AT2A1_RAT  | Q64578 | Sarcoplasmic/endoplasmic reticulum calcium ATPase 1 (SERCA1) | Atp2a1   | H (1) M (1) R (1) | 12 |
| Met II        | AT5F1_RAT  | P19511 | ATP synthase F(0) complex subunit B1 mitochondrial           | Atp5pb   | H (1) M (1) R (1) | 48 |
| Met II        | ATAD1_RAT  | Q505J9 | ATPase family AAA domain-containing protein 1                | Atad1    | H (1) M (1) R (1) | 24 |
| Met II        | ATAD3_RAT  | Q3KRE0 | ATPase family AAA domain-containing protein 3                | Atad3    | H (1) M (1)       | 5  |
| Met II        | ATP4A_RAT  | P09626 | Potassium-transporting ATPase alpha chain 1                  | Atp4a    | H (1) M (1) R (1) | 24 |
| Met I; Met II | ATP5H_RAT  | P31399 | ATP synthase subunit D mitochondrial                         | Atp5pd   | H (1)             | 41 |
| Met I; Met II | ATP5I_RAT  | P29419 | ATP synthase subunit E mitochondrial                         | Atp5me   | H (1)             | 20 |
| Met I; Met II | ATP5J_RAT  | P21571 | ATP synthase-coupling factor 6 mitochondrial                 | Atp5pf   | H (1) M (1) R (1) | 22 |
| Met I; Met II | ATPA_RAT   | P15999 | ATP synthase subunit alpha mitochondrial                     | Atp5f1a  | H (3) M (3) R (3) | 98 |
| Met I         | ATPB_RAT   | P10719 | ATP synthase subunit beta mitochondrial                      | Atp5f1b  | H (1) M (1) R (3) | 97 |
| Met II        | ATPG_RAT   | P35435 | ATP synthase subunit gamma mitochondrial                     | Atp5f1c  | H (1) M (1) R (1) | 37 |
| Met II        | ATPK_RAT   | D3ZAF6 | ATP synthase subunit F mitochondrial                         | Atp5mf   | H (1) M (1)       | 19 |
| Met I; Met II | ATPO_RAT   | Q06647 | ATP synthase subunit O mitochondrial                         | Atp5po   | H (1)             | 33 |
| Met II        | ATRAP_RAT  | Q642A2 | Type-1 angiotensin II receptor-associated protein            | Agtrap   | H (1)             | 2  |
| Met II        | AUP1_RAT   | A1L134 | Ancient ubiquitous protein 1                                 | Aup1     | H (0) M (0)       | 2  |
| Met II        | B0BN02_RAT | B0BN02 | Metaxin 1                                                    | Mtx1     | H (1) M (1)       | 5  |
| Met II        | B0BN30_RAT | B0BN30 | Mitochondrial carrier homolog 1                              | Mtch1    | H (1) M (1)       | 15 |
| Met II        | B0BN52_RAT | B0BN52 | Mitochondrial carrier homolog 2                              | Mtch2    | H (1) M (1)       | 28 |
| Met I; Met II | B0BN81_RAT | B0BN81 | Ribosomal protein S5                                         | Rps5     | H (1) M (1) R (1) | 30 |
| Met I; Met II | B0BNG3_RAT | B0BNG3 | Vesicular integral-membrane protein VIP36                    | Lman2    | H (1) M (1)       | 22 |
| Met I         | B0BNJ1_RAT | B0BNJ1 | Sorcin                                                       | Sri      | H (0) M (0)       | 9  |
| Met II        | B0BNK1_RAT | B0BNK1 | Ras-related protein Rab-5c                                   | Rab5c    | H (1) M (1)       | 51 |
| Met I         | B0K010_RAT | B0K010 | Thioredoxin domain-containing 17                             | Txndc17  | M (0)             | 1  |
| Met I         | B0K031_RAT | B0K031 | 60S ribosomal protein L7, isoform                            | Rpl7     | H (1) M (1) R (1) | 48 |
| Met II        | B1WBY5_RAT | B1WBY5 | Dnaj homolog subfamily C member 11                           | Dnajc11  | H (1) M (1)       | 21 |
| Met II        | B1WBY7_RAT | B1WBY7 | Erlin-1                                                      | Erlin1   | H (1) M (1)       | 47 |
| Met II        | B1WC61_RAT | B1WC61 | Acyl-CoA dehydrogenase family member 9                       | Acad9    | H (0)             | 5  |
| Met II        | B1WC67_RAT | B1WC67 | Solute carrier family 25 member 24                           | Slc25a24 | H (1) M (1)       | 26 |
| Met I; Met II | B2GUV5_RAT | B2GUV5 | V-type proton ATPase subunit G 1                             | Atp6v1g1 | H (0)             | 23 |
| Met II        | B2GUX5_RAT | B2GUX5 | 5'-nucleotidase                                              | Nt5c3a   | H (3) M (3) R (3) | 54 |
| Met I; Met II | B2GUZ9_RAT | B2GUZ9 | Fam49b protein                                               | Fam49b   | H (1)             | 2  |
| Met I         | B2GV72_RAT | B2GV72 | Carbonyl reductase 3                                         | Cbr3     | H (1)             | 1  |
| Met I; Met II | B2GV96_RAT | B2GV96 | Coiled-coil domain containing 115                            | Ccdc115  | H (0) M (0)       | 23 |
| Met I         | B2GVB9_RAT | B2GVB9 | Fermt3 protein                                               | Fermt3   | H (0)             | 12 |
| Met I; Met II | B2MG_RAT   | P07151 | Beta-2-microglobulin                                         | B2m      | H (1) M (1) R (1) | 19 |
| Met I; Met II | B2RYC9_RAT | B2RYC9 | Glucosylceramidase                                           | Gba      | H (0) M (0) R (0) | 12 |

|               |            |        |                                                                     |          |                   |    |
|---------------|------------|--------|---------------------------------------------------------------------|----------|-------------------|----|
| Met II        | B2RYD7_RAT | B2RYD7 | STT3B, catalytic subunit of the oligosaccharyltransferase complex   | Stt3b    | H (1) M (1)       | 11 |
| Met II        | B2RYF6_RAT | B2RYF6 | Cleft lip and palate associated transmembrane protein 1             | Clptm1   | H (1) M (1)       | 7  |
| Met II        | B2RYQ2_RAT | B2RYQ2 | Serine/threonine-protein phosphatase 2A activator                   | Ptpa     | H (0)             | 1  |
| Met I         | B2RZ27_RAT | B2RZ27 | SH3 domain-binding glutamic acid-rich-like protein 3                | Sh3bgrl3 | H (0)             | 8  |
| Met II        | B2RZB3_RAT | B2RZB3 | Eva-1 homolog B                                                     | Eva1b    | H (1)             | 2  |
| Met I; Met II | B2RZD1_RAT | B2RZD1 | Protein transport protein Sec61 subunit beta                        | Sec61b   | H (1) M (1)       | 16 |
| Met II        | B3A2_RAT   | P23347 | Anion exchange protein 2                                            | Slc4a2   | H (0)             | 1  |
| Met II        | B4F7C2_RAT | B4F7C2 | Tubulin beta-4A                                                     | Tubb4a   | H (1) M (1)       | 21 |
| Met II        | B4F7C9_RAT | B4F7C9 | STT3A, catalytic subunit of the oligosaccharyltransferase complex   | Stt3a    | H (1) M (1)       | 20 |
| Met II        | B5DEL8_RAT | B5DEL8 | NADH dehydrogenase (Ubiquinone) iron-sulfur protein 5               | Ndufs5   | H (1) M (1)       | 18 |
| Met II        | B6RK61_RAT | B6RK61 | Myosin heavy chain 7B                                               | Myh7b    | H (1)             | 2  |
| Met II        | BAF_RAT    | Q9R1T1 | Barrier-to-autointegration factor                                   | Banf1    | H (0) M (0)       | 11 |
| Met I         | BAG6_RAT   | Q6MG49 | Large proline-rich protein BAG6                                     | Bag6     | H (0) M (0)       | 4  |
| Met I; Met II | BASI_RAT   | P26453 | Basigin                                                             | Bsg      | H (3) M (3) R (3) | 78 |
| Met I; Met II | BASP1_RAT  | Q05175 | Brain acid soluble protein 1                                        | Basp1    | H (3) M (3) R (3) | 68 |
| Met II        | BET1_RAT   | Q62896 | Bet1 golgi vesicular membrane trafficking protein                   | Bet1     | H (0)             | 2  |
| Met II        | BET1L_RAT  | O35152 | BET1-like protein                                                   | Bet1l    | H (0)             | 2  |
| Met II        | C1GLT_RAT  | Q9JJ05 | Glycoprotein-N-acetylgalactosamine 3-beta-galactosyltransferase 1   | C1galt1  | M (0)             | 1  |
| Met I; Met II | C1QBP_RAT  | O35796 | Complement component 1 Q subcomponent-binding protein mitochondrial | C1qbp    | H (1) M (1) R (1) | 28 |
| Met II        | CADM3_RAT  | Q1WIM3 | Cell adhesion molecule 3                                            | Cadm3    | R (0)             | 2  |
| Met I         | CAH2_RAT   | P27139 | Carbonic anhydrase 2                                                | Ca2      | H (0) M (0)       | 9  |
| Met I         | CALM_RAT   | P0DP29 | Calmodulin-1                                                        | Calm1    | H (0) M (0)       | 4  |
| Met I; Met II | CALR_RAT   | P18418 | Calreticulin                                                        | Calr     | H (1) M (1) R (1) | 49 |
| Met I; Met II | CALX_RAT   | P35565 | Calnexin                                                            | Canx     | H (1) M (1) R (1) | 83 |
| Met I         | CAP1_RAT   | Q08163 | Adenylyl cyclase-associated protein 1                               | Cap1     | H (1) M (1) R (0) | 36 |
| Met I         | CAPG_RAT   | Q6AYC4 | Macrophage-capping protein                                          | Capg     | H (0) M (0)       | 15 |
| Met I         | CAPZB_RAT  | Q5XI32 | F-actin-capping protein subunit beta                                | Capzb    | H (1) M (1) R (1) | 39 |
| Met I         | CAZA2_RAT  | Q3T1K5 | F-actin-capping protein subunit alpha-2                             | Capza2   | H (1) M (1) R (1) | 18 |
| Met II        | CCD47_RAT  | Q5U2X6 | Coiled-coil domain-containing protein 47                            | Ccdc47   | H (1) M (1) R (1) | 23 |
| Met II        | CD38_RAT   | Q64244 | ADP-ribosyl cyclase/cyclic ADP-ribose hydrolase 1                   | Cd38     | H (0) M (0)       | 6  |
| Met I; Met II | CD48_RAT   | P10252 | CD48 antigen                                                        | Cd48     | H (1) M (1) R (1) | 16 |
| Met I         | CDC37_RAT  | Q63692 | Hsp90 co-chaperone Cdc37                                            | Cdc37    | H (0) M (0)       | 8  |
| Met I; Met II | CDC42_RAT  | Q8CFN2 | Cell division control protein 42 homolog (CDC42)                    | Cdc42    | H (1) M (1) R (1) | 59 |
| Met I         | CDV3_RAT   | Q5XIM5 | Protein CDV3 homolog                                                | Cdv3     | H (0)             | 4  |
| Met I; Met II | CH10_RAT   | P26772 | 10 kDa heat shock protein mitochondrial                             | Hspe1    | H (1) M (0) R (1) | 22 |
| Met II        | CH60_RAT   | P63039 | 60 kDa heat shock protein                                           | Hspd1    | H (1) M (1) R (1) | 65 |
| Met II        | CISD1_RAT  | B0K020 | CDGSH iron-sulfur domain-containing protein 1                       | Cisd1    | H (1) M (1) R (1) | 24 |
| Met I; Met II | CISY_RAT   | Q8VHF5 | Citrate synthase mitochondrial                                      | Cs       | H (1) M (1) R (1) | 16 |
| Met II        | CK5P3_RAT  | Q9JLH7 | CDK5 regulatory subunit-associated protein 3                        | Cdk5rap3 | H (0) M (0)       | 3  |
| Met II        | CLCN5_RAT  | P51796 | Chloride intracellular channel protein 5                            | Clcn5    | H (1) M (1)       | 4  |
| Met I; Met II | CLH1_RAT   | P11442 | Clathrin heavy chain 1                                              | Cltc     | H (3) M (3) R (3) | 77 |
| Met I         | CLIC1_RAT  | Q6MG61 | Chloride intracellular channel protein 1                            | Clic1    | H (1) M (1)       | 32 |
| Met I; Met II | CNTN1_RAT  | Q63198 | Contactin 1                                                         | Cntn1    | H (1) M (1) R (1) | 16 |
| Met I; Met II | COF1_RAT   | P45592 | Cofilin-1                                                           | Cfl1     | H (1) M (1) R (1) | 52 |

|               |            |        |                                                               |                      |                   |    |
|---------------|------------|--------|---------------------------------------------------------------|----------------------|-------------------|----|
| Met II        | COMT_RAT   | P22734 | Catechol O-methyltransferase                                  | Comt                 | H (1) R (1)       | 14 |
| Met II        | COPB_RAT   | P23514 | Coatomer subunit beta 1                                       | Copb1                | H (0) M (0)       | 20 |
| Met II        | COPB2_RAT  | O35142 | Coatomer subunit beta 2                                       | Copb2                | H (0) M (0)       | 19 |
| Met II        | COPG1_RAT  | Q4AEF8 | Coatomer subunit gamma 1                                      | Copg1                | H (0) M (0) R (0) | 11 |
| Met I         | COR1A_RAT  | Q91ZN1 | Coronin-1A                                                    | Coro1a               | H (2) M (2) R (2) | 22 |
| Met I         | COTL1_RAT  | B0BNA5 | Coactosin-like protein                                        | Cotl1                | H (0)             | 4  |
| Met I; Met II | COX41_RAT  | P10888 | Cytochrome c oxidase subunit 4 isoform 1 mitochondrial        | Cox4i1               | H (1) M (1) R (1) | 61 |
| Met I; Met II | COX5A_RAT  | P11240 | Cytochrome c oxidase subunit 5A mitochondrial                 | Cox5a                | H (3) M (3) R (3) | 55 |
| Met I; Met II | COX5B_RAT  | P12075 | Cytochrome c oxidase subunit 5B mitochondrial                 | Cox5b                | H (1) M (1) R (1) | 42 |
| Met I; Met II | CP20A_RAT  | Q6P7D4 | Cytochrome P450 20A1                                          | Cyp20a1              | H (0) M (0)       | 3  |
| Met II        | CP51A_RAT  | Q64654 | Lanosterol 14-alpha demethylase                               | Cyp51a1              | H (0)             | 5  |
| Met II        | CR1L_RAT   | Q63135 | Complement component receptor 1-like protein                  | Cr1l                 | M (0)             | 1  |
| Met I; Met II | CX6C2_RAT  | P11951 | Cytochrome c oxidase subunit 6C2                              | Cox6c2               | R (3)             | 6  |
| Met II        | CX7A2_RAT  | P35171 | Cytochrome c oxidase subunit 7A2                              | Cox7a2               | H (1) M (1) R (1) | 40 |
| Met II        | CYB5B_RAT  | P04166 | Cytochrome b5 type B                                          | Cyb5b                | H (1) M (1) R (1) | 32 |
| Met I         | CYBP_RAT   | Q6AYK6 | Calcyclin-binding protein                                     | Cacybp               | H (0) M (0)       | 6  |
| Met I         | CYC_RAT    | P62898 | Cytochrome c somatic                                          | Cycs                 | M (0) R (0)       | 4  |
| Met II        | D3Z9L0_RAT | D3Z9L0 | Acylglycerol kinase                                           | Agk                  | H (1) M (1)       | 17 |
| Met II        | D3ZAS9_RAT | D3ZAS9 | DDR GK domain containing 1                                    | Ddrgk1               | H (1) M (1)       | 10 |
| Met II        | D3ZAY7_RAT | D3ZAY7 | Band 4.1-like protein 2                                       | Epb41l2              | H (1) M (1)       | 22 |
| Met II        | D3ZCZ9_RAT | D3ZCZ9 | NADH dehydrogenase [ubiquinone] iron-sulfur protein 6         | LOC100912599         | H (0)             | 15 |
| Met I; Met II | D3ZD09_RAT | D3ZD09 | Cytochrome c oxidase subunit 6B1                              | Cox6b1               | H (3) M (3)       | 23 |
| Met II        | D3ZD11_RAT | D3ZD11 | Signal peptidase complex subunit 2                            | Spcs2                | H (1) M (1)       | 22 |
| Met II        | D3ZD83_RAT | D3ZD83 | Major facilitator superfamily domain-containing protein 10    | Mfsd10               | M (0)             | 3  |
| Met II        | D3ZDR2_RAT | D3ZDR2 | Charged multivesicular body protein 6                         | Chmp6                | H (0) M (0)       | 7  |
| Met II        | D3ZF11_RAT | D3ZF11 | Ragulator complex protein LAMTOR5                             | Lamtor5              | H (1) M (1)       | 15 |
| Met II        | D3ZF12_RAT | D3ZF12 | Signal peptidase complex subunit 3                            | Spcs3                | H (1) R (1)       | 17 |
| Met II        | D3ZF54_RAT | D3ZF54 | Anoctamin-10                                                  | Ano10                | H (0) M (0)       | 11 |
| Met II        | D3ZFK5_RAT | D3ZFK5 | Signal peptidase complex subunit 1                            | Spcs1                | H (0)             | 4  |
| Met II        | D3ZG43_RAT | D3ZG43 | NADH dehydrogenase (ubiquinone) iron-sulfur protein 3         | Ndufs3               | H (1) M (1)       | 42 |
| Met I; Met II | D3ZGM7_RAT | D3ZGM7 | Peptidase inhibitor 16                                        | Pi16                 | H (0)             | 11 |
| Met II        | D3ZHA7_RAT | D3ZHA7 | Myosin light chain 6B                                         | RGD1560334_predicted | M (0)             | 12 |
| Met II        | D3ZIE9_RAT | D3ZIE9 | Delta-1-pyrroline-5-carboxylate synthase                      | Aldh18a1             | H (1) M (1)       | 6  |
| Met II        | D3ZIJ5_RAT | D3ZIJ5 | Dolichyl-phosphate mannosyltransferase subunit 3              | Dpm3                 | H (0)             | 2  |
| Met II        | D3ZIP8_RAT | D3ZIP8 | Endonuclease domain containing 1                              | ---                  | H (1) M (1)       | 44 |
| Met II        | D3ZJ32_RAT | D3ZJ32 | Extended synaptotagmin 2                                      | Esyt2                | H (1) M (1)       | 9  |
| Met II        | D3ZJS3_RAT | D3ZJS3 | Translocase of outer mitochondrial membrane 6                 | Tomm6                | H (1)             | 2  |
| Met II        | D3ZJX5_RAT | D3ZJX5 | Mitochondrial import inner membrane translocase subunit TIM50 | Timm50               | H (1) M (1)       | 15 |
| Met II        | D3ZK56_RAT | D3ZK56 | Ras-related protein Rap-2c                                    | Rap2c                | H (0) M (0)       | 26 |
| Met II        | D3ZKE6_RAT | D3ZKE6 | Sarcolemmal membrane-associated protein                       | Slmap                | M (0)             | 1  |
| Met II        | D3ZL85_RAT | D3ZL85 | Cytochrome c heme lyase                                       | Hccs                 | H (1)             | 4  |
| Met II        | D3ZLC4_RAT | D3ZLC4 | Slc2a6 protein                                                | Slc2a6               | M (0)             | 1  |
| Met II        | D3ZLT7_RAT | D3ZLT7 | Uncharacterized protein KIAA2013                              | RGD1305350           | H (0) M (0)       | 10 |
| Met II        | D3ZM19_RAT | D3ZM19 | Protein EVI2B                                                 | Evi2b                | H (0)             | 1  |

|               |            |        |                                                           |          |                   |    |
|---------------|------------|--------|-----------------------------------------------------------|----------|-------------------|----|
| Met II        | D3ZMR1_RAT | D3ZMR1 | Translocase of outer mitochondrial membrane 7             | Tomm7    | H (1)             | 6  |
| Met I; Met II | D3ZN21_RAT | D3ZN21 | ATP-dependent RNA helicase DDX3Y                          | Ddx3y    | H (1) M (1)       | 8  |
| Met II        | D3ZNG3_RAT | D3ZNG3 | Signal peptide peptidase-like 2A                          | Sppl2a   | H (0) M (0)       | 2  |
| Met II        | D3ZP13_RAT | D3ZP13 | Sulfhydryl oxidase 2                                      | Qsox2    | H (0)             | 2  |
| Met II        | D3ZP98_RAT | D3ZP98 | Minor histocompatibility antigen H13                      | Hm13     | H (1) M (1)       | 21 |
| Met I         | D3ZPP2_RAT | D3ZPP2 | ADP-ribosylation factor-like protein 8A                   | Arl8a    | H (0) M (1)       | 19 |
| Met I; Met II | D3ZPR0_RAT | D3ZPR0 | Exportin-2                                                | Cse1l    | H (0) M (0)       | 18 |
| Met I; Met II | D3ZRN3_RAT | D3ZRN3 | Beta-actin-like protein 2                                 | Actbl2   | H (1) M (3)       | 28 |
| Met I; Met II | D3ZSA9_RAT | D3ZSA9 | Nodal modulator 1                                         | Nomo1    | H (1) M (1)       | 13 |
| Met II        | D3ZTJ0_RAT | D3ZTJ0 | Protein XRP2                                              | Rp2      | H (1) M (1)       | 50 |
| Met II        | D3ZUD8_RAT | D3ZUD8 | Transmembrane 9 superfamily member 3                      | Tm9sf3   | H (0) M (0)       | 18 |
| Met II        | D3ZUX5_RAT | D3ZUX5 | MICOS complex subunit MIC-19                              | Chchd3   | H (1) M (1)       | 35 |
| Met II        | D3ZUZ4_RAT | D3ZUZ4 | Glycosaminoglycan xylosylkinase                           | Fam20b   | H (0) M (0)       | 2  |
| Met I; Met II | D3ZV75_RAT | D3ZV75 | Major facilitator superfamily domain-containing protein 1 | Mfsd1    | H (0)             | 6  |
| Met II        | D3ZWS0_RAT | D3ZWS0 | Protein scribble homolog                                  | Scrib    | H (1) M (1)       | 18 |
| Met II        | D3ZXF9_RAT | D3ZXF9 | 39S ribosomal protein L12, mitochondrial                  | Mrpl12   | H (1)             | 7  |
| Met I         | D3ZYS7_RAT | D3ZYS7 | Ras GTPase-activating protein 1                           | G3bp1    | H (3) M (0)       | 16 |
| Met I; Met II | D3ZYW2_RAT | Q499R8 | Heterogeneous nuclear ribonucleoprotein H                 | Hnrnph1  | H (1) M (1)       | 18 |
| Met I; Met II | D3ZZR9_RAT | D3ZZR9 | Peptidylprolyl isomerase                                  | Fkbp2    | H (1)             | 1  |
| Met II        | D3ZZS8_RAT | D3ZZS8 | V-type proton ATPase subunit B, kidney isoform            | Atp6v1b1 | H (0)             | 10 |
| Met II        | D4A017_RAT | D4A017 | Transmembrane protein 87 A                                | Tmem87a  | H (0) M (0)       | 2  |
| Met II        | D4A0E2_RAT | D4A0E2 | NSF attachment protein gamma                              | Napg     | H (1) M (1)       | 6  |
| Met II        | D4A0G7_RAT | D4A0G7 | Ras-related protein Rab-37                                | Rab37    | H (0)             | 1  |
| Met II        | D4A0T0_RAT | D4A0T0 | NADH dehydrogenase 1 beta subcomplex subunit 10           | Ndufb10  | H (3) M (3) R (3) | 41 |
| Met II        | D4A0T8_RAT | D4A0T8 | Dehydrogenase/reductase SDR family member 7               | Dhrs7    | H (0)             | 5  |
| Met II        | D4A0W1_RAT | D4A0W1 | ER membrane protein complex subunit 4                     | Emc4     | H (1)             | 4  |
| Met I         | D4A0Y9_RAT | D4A0Y9 | Phosphatidylcholine translocator ABCB4                    | Abcb1b   | R (0)             | 1  |
| Met I; Met II | D4A133_RAT | D4A133 | V-type proton ATPase catalytic subunit A                  | Atp6v1a  | H (3) M (3)       | 78 |
| Met I; Met II | D4A1D8_RAT | D4A1D8 | Surfeit 4                                                 | Surf4    | H (1) M (1)       | 24 |
| Met II        | D4A2H2_RAT | D4A2H2 | Serine palmitoyltransferase 1                             | Sptlc1   | H (1) M (1)       | 15 |
| Met II        | D4A2Z6_RAT | D4A2Z6 | Translocation protein SEC63 homolog                       | Sec63    | H (1)             | 9  |
| Met II        | D4A376_RAT | D4A376 | Ras-related protein Rab-12                                | Rab12    | H (1) M (1) R (1) | 8  |
| Met II        | D4A416_RAT | D4A416 | Cleft lip and palate transmembrane protein 1-like protein | Clptm1l  | H (1) M (1)       | 12 |
| Met II        | D4A465_RAT | D4A465 | Ragulator complex protein LAMTOR2                         | Lamtor2  | H (3) M (3)       | 38 |
| Met II        | D4A4J3_RAT | D4A4J3 | Alpha-mannosidase 2x                                      | Man2a2   | H (0)             | 1  |
| Met II        | D4A4T0_RAT | D4A4T0 | STIP1 homology and U box-containing protein 1             | Stub1    | M (0)             | 4  |
| Met II        | D4A5K6_RAT | D4A5K6 | Zinc metallopeptidase STE24                               | Zmpste24 | H (1) M (1)       | 27 |
| Met II        | D4A781_RAT | D4A781 | Importin 5                                                | Ipo5     | H (1) M (1)       | 20 |
| Met I         | D4A7U1_RAT | D4A7U1 | Zyxin                                                     | Zyx      | H (0) M (0)       | 24 |
| Met II        | D4A7Y9_RAT | D4A7Y9 | Essential MCU regulator, mitochondrial                    | Smdt1    | H (0)             | 1  |
| Met II        | D4A994_RAT | D4A994 | ER membrane protein complex subunit 1                     | Emc1     | H (1)             | 12 |
| Met I; Met II | D4A9L2_RAT | D4A9L2 | Serine/arginine-rich splicing factor 1                    | Srsf1    | H (1) M (1)       | 9  |
| Met II        | D4AA91_RAT | D4AA91 | Ceramide synthase 5                                       | Cers5    | H (0)             | 1  |
| Met I; Met II | D4AAE9_RAT | D4AAE9 | CDGSH iron-sulfur domain-containing protein 2             | Cisd2    | H (0) M (0)       | 7  |

|               |            |        |                                                                            |         |                   |    |
|---------------|------------|--------|----------------------------------------------------------------------------|---------|-------------------|----|
| Met II        | D4AAL4_RAT | D4AAL4 | Adhesion G protein-coupled receptor L3                                     | Adgrl3  | H (0) R (0)       | 4  |
| Met II        | D4ABI7_RAT | D4ABI7 | Very-long-chain (3R)-3-hydroxyacyl-CoA dehydratase                         | Hacd3   | H (1) M (1)       | 22 |
| Met II        | D4ABM3_RAT | D4ABM3 | Dishevelled associated activator of morphogenesis 1                        | Daam1   | H (0)             | 9  |
| Met II        | D4ABY2_RAT | D4ABY2 | Coatomer subunit gamma 2                                                   | Copg2   | H (0)             | 2  |
| Met II        | D4ACG2_RAT | D4ACG2 | Acetolactate synthase-like protein                                         | Ilvbl   | H (1)             | 4  |
| Met II        | D4ADE8_RAT | D4ADE8 | ATP-dependent RNA helicase DDX3X                                           | Ddx3x   | H (1) M (1)       | 12 |
| Met I; Met II | D4ADS9_RAT | D4ADS9 | EFR3 homolog A                                                             | Efr3a   | H (1) M (1)       | 39 |
| Met II        | D4ADV4_RAT | Q80ZA5 | Sodium-driven chloride bicarbonate exchanger                               | Slc4a10 | R (0)             | 1  |
| Met I; Met II | D4AEG2_RAT | D4AEG2 | Ras-related protein Rab-32                                                 | Rab32   | H (0) M (0)       | 10 |
| Met I         | D4AEP0_RAT | D4AEP0 | Adenylosuccinate synthetase isozyme 2                                      | Adss    | H (1)             | 4  |
| Met II        | DAD1_RAT   | P61805 | Dolichyl-diphosphooligosaccharide protein glycosyltransferase subunit DAD1 | Dad1    | H (0) M (0) R (0) | 14 |
| Met II        | DHC24_RAT  | Q5BQE6 | Delta(24)-sterol reductase                                                 | Dhcr24  | H (1) M (1)       | 12 |
| Met II        | DHCR7_RAT  | Q9Z2Z8 | 7-dehydrocholesterol reductase                                             | Dhcr7   | H (0) M (0) R (0) | 11 |
| Met II        | DHE3_RAT   | P10860 | Glutamate dehydrogenase 1                                                  | Glud1   | H (1) M (1) R (1) | 27 |
| Met II        | DHPR_RAT   | P11348 | Dihydropteridine reductase                                                 | Qdpr    | H (1) M (1)       | 2  |
| Met I; Met II | DHSA_RAT   | Q920L2 | Succinate dehydrogenase [ubiquinone] flavoprotein subunit mitochondrial    | Sdha    | H (1) M (1) R (1) | 34 |
| Met II        | DHSB_RAT   | P21913 | Succinate dehydrogenase [ubiquinone] iron-sulfur subunit mitochondrial     | Sdhb    | H (1) M (1) R (1) | 17 |
| Met I         | DUT_RAT    | P70583 | Deoxyuridine 5'-triphosphate nucleotidohydrolase                           | Dut     | H (0)             | 2  |
| Met I         | DX39B_RAT  | Q63413 | Spliceosome RNA helicase Ddx39b                                            | Ddx39b  | H (0) M (0)       | 7  |
| Met I         | E9PSV5_RAT | E9PSV5 | Phosphoserine aminotransferase                                             | Psat1   | H (1) M (1)       | 12 |
| Met I; Met II | E9PT29_RAT | E9PT29 | ATP-dependent RNA helicase DDX17                                           | Ddx17   | H (0) M (1)       | 6  |
| Met I         | E9PT65_RAT | E9PT65 | Radixin                                                                    | Rdx     | H (1) M (1)       | 14 |
| Met II        | E9PTI1_RAT | E9PTI1 | V-type proton ATPase subunit H                                             | Atp6v1h | H (1) M (1)       | 46 |
| Met II        | E9PTU4_RAT | E9PTU4 | Myosin heavy chain 11                                                      | Myh11   | H (0) M (0)       | 15 |
| Met I; Met II | E9PTW1_RAT | E9PTW1 | Secretory carrier-associated membrane protein                              | Scamp3  | H (0)             | 1  |
| Met I; Met II | E9PTX9_RAT | E9PTX9 | Solute carrier family 12 member 2                                          | Slc12a2 | H (1) M (1)       | 23 |
| Met II        | E9PU37_RAT | E9PU37 | Palmitoyltransferase                                                       | Zdhhc13 | H (0)             | 1  |
| Met II        | ECHA_RAT   | Q64428 | Trifunctional enzyme subunit alpha                                         | Hadha   | H (3) M (3) R (3) | 65 |
| Met I         | EF1A1_RAT  | P62630 | Elongation factor 1-alpha 1                                                | Eef1a1  | H (1) M (3) R (3) | 70 |
| Met I; Met II | EF1G_RAT   | Q68FR6 | Elongation factor 1-gamma                                                  | Eef1g   | H (1) M (1) R (1) | 38 |
| Met I; Met II | EF2_RAT    | P05197 | Elongation factor 2                                                        | Eef2    | H (3) M (3) R (3) | 52 |
| Met II        | EMC2_RAT   | B0BNG0 | ER membrane protein complex subunit 2                                      | Emc2    | H (1) M (1)       | 12 |
| Met II        | EMC3_RAT   | Q5U2V8 | ER membrane protein complex subunit 3                                      | Emc3    | H (1)             | 4  |
| Met II        | EMC8_RAT   | Q5FVL2 | ER membrane protein complex subunit 8                                      | Emc8    | H (1) M (1) R (1) | 11 |
| Met I; Met II | ENOA_RAT   | P04764 | Alpha-enolase                                                              | Eno1    | H (1) M (3) R (3) | 63 |
| Met I         | ENOB_RAT   | P15429 | Beta-enolase                                                               | Eno3    | H (0) R (0)       | 10 |
| Met I; Met II | ENPL_RAT   | Q66HD0 | Endoplasmic reticulum protein                                              | Hsp90b1 | H (1) M (1)       | 52 |
| Met II        | ENPP3_RAT  | P97675 | Ectonucleotide pyrophosphatase/phosphodiesterase family member 3           | Enpp3   | H (0) R (1)       | 4  |
| Met II        | ERLN2_RAT  | B5DEH2 | Erlin-2                                                                    | Erlin2  | H (3) M (3) R (3) | 74 |
| Met I         | ERO1A_RAT  | Q8R4A1 | ERO1-like protein alpha                                                    | Ero1a   | H (1)             | 3  |
| Met I         | ERP29_RAT  | P52555 | Endoplasmic reticulum resident protein 29                                  | Erp29   | H (1) M (0)       | 17 |
| Met II        | ESYT1_RAT  | Q9Z1X1 | Extended synaptotagmin 1                                                   | Esyt1   | H (1) M (1) R (1) | 39 |
| Met I         | EZRI_RAT   | P31977 | Ezrin                                                                      | Ezr     | H (1) M (1)       | 24 |
| Met I         | F10A1_RAT  | P50503 | Hsc70-interacting protein                                                  | St13    | H (0) M (0)       | 6  |

|               |            |        |                                                                  |           |                   |    |
|---------------|------------|--------|------------------------------------------------------------------|-----------|-------------------|----|
| Met I; Met II | F1LM66_RAT | F1LM66 | 116 kDa U5 small nuclear ribonucleoprotein component             | Eftud2    | H (1) M (1)       | 8  |
| Met I         | F1LM82_RAT | F1LM82 | Heterogeneous nuclear ribonucleoproteins A2/B1                   | Hnrnpa2b1 | H (1) M (1)       | 21 |
| Met II        | F1LMG7_RAT | F1LMG7 | Leucine-rich repeat-containing protein 7                         | Lrrc7     | R (0)             | 3  |
| Met I; Met II | F1LMM5_RAT | F1LMM5 | Arachidonate 5-lipoxygenase                                      | Alox5     | H (0)             | 2  |
| Met I         | F1LMP7_RAT | F1LMP7 | Granulins                                                        | Grn       | H (0) M (0)       | 4  |
| Met II        | F1LN88_RAT | F1LN88 | Aldehyde dehydrogenase                                           | Aldh2     | M (1)             | 6  |
| Met II        | F1LNC4_RAT | F1LNC4 | Vesicle transport through interaction with t-SNAREs homolog 1B   | Vti1b     | H (1) M (1) R (1) | 20 |
| Met II        | F1LNF0_RAT | F1LNF0 | Myosin heavy chain 14                                            | Myh14     | H (0) M (0)       | 21 |
| Met II        | F1LNT8_RAT | F1LNT8 | VAMP8                                                            | Vamp8     | H (1) M (1) R (1) | 29 |
| Met II        | F1LNX2_RAT | F1LNX2 | Calcium release-activated calcium channel protein 1 (Orai1)      | Orai1     | H (0)             | 3  |
| Met II        | F1LP82_RAT | F1LP82 | Ras-related protein Rab-2a                                       | Rab2a     | H (1) M (1) R (1) | 58 |
| Met II        | F1LPK9_RAT | F1LPK9 | Phosphatidylinositol glycan anchor biosynthesis class U protein  | Pigu      | H (1)             | 4  |
| Met I         | F1LPV0_RAT | F1LPV0 | Asparagine--tRNA ligase, cytoplasmic                             | Nars      | H (0)             | 2  |
| Met I; Met II | F1LQ81_RAT | F1LQ81 | Vesicle-fusing ATPase                                            | Nsf       | H (1) M (1) R (1) | 32 |
| Met II        | F1LQ92_RAT | F1LQ92 | Sel-1 homolog 1                                                  | Sel1l     | H (0) R (0)       | 6  |
| Met I         | F1LQJ7_RAT | F1LQJ7 | Phosphoenolpyruvate carboxykinase [GTP], mitochondrial           | Pck2      | H (0)             | 2  |
| Met II        | F1LQR8_RAT | F1LQR8 | Inositol 1,4,5-trisphosphate receptor type 2                     | Itpr2     | H (0)             | 6  |
| Met I; Met II | F1LRK1_RAT | F1LRK1 | Sodium/potassium-transporting ATPase subunit alpha               | Atp4a     | M (1)             | 1  |
| Met II        | F1LSI5_RAT | F1LSI5 | Ras GTPase-activating protein 3                                  | Rasa3     | H (0) M (0) R (0) | 17 |
| Met I         | F1LSN4_RAT | F1LSN4 | Fibroblast growth factor receptor                                | Fgfr3     | H (0)             | 1  |
| Met II        | F1LSV4_RAT | Q3B7D2 | Serine palmitoyltransferase 2                                    | Sptlc2    | H (0)             | 1  |
| Met II        | F1LU48_RAT | F1LU48 | Endoplasmic reticulum-golgi intermediate compartment 1           | Ergic1    | H (1) M (1)       | 10 |
| Met II        | F1LVC3_RAT | F1LVC3 | Ras-related protein Rab-6b                                       | Rab6b     | H (0)             | 12 |
| Met I         | F1LVV4_RAT | F1LVV4 | Protein RCC2                                                     | Rcc2      | H (0)             | 1  |
| Met II        | F1LW77_RAT | F1LW77 | Ras-related protein Rab-33b                                      | Rab33b    | M (0)             | 3  |
| Met II        | F1LX07_RAT | F1LX07 | Solute carrier family 25 member 12                               | Slc25a12  | H (1) M (1)       | 32 |
| Met I; Met II | F1LZW6_RAT | F1LZW6 | Solute carrier family 25 member 13                               | Slc25a13  | R (1)             | 1  |
| Met II        | F1LZX9_RAT | F1LZX9 | Integrin alpha 5                                                 | Itgav     | H (1) M (1)       | 15 |
| Met I; Met II | F1M0G0_RAT | F1M0G0 | Regulator of G-protein signaling 17                              | Rgs17     | H (1) M (1)       | 3  |
| Met I; Met II | F1M0J3_RAT | F1M0J3 | Sodium bicarbonate cotransporter 3, isophorm 4                   | Slc4a7    | H (1) M (1) R (1) | 20 |
| Met II        | F1M1U0_RAT | F1M1U0 | Matrix remodeling associated 7                                   | Mxra7     | H (0) M (0)       | 2  |
| Met I         | F1M2K3_RAT | F1M2K3 | Small ubiquitin-related modifier                                 | Sumo2     | H (0) M (0)       | 5  |
| Met I         | F1M2P8_RAT | F1M2P8 | Protein kinase C alpha                                           | Prkca     | H (1) M (1)       | 4  |
| Met II        | F1M391_RAT | F1M391 | Stimulator of interferon genes protein                           | Tmem173   | H (1)             | 11 |
| Met I         | F1M4T3_RAT | B2RYQ5 | Enhancer of rudimentary homolog                                  | Erh       | H (0) M (0)       | 8  |
| Met II        | F1M5Z5_RAT | F1M5Z5 | Anoctamin-6                                                      | Ano6      | H (0) M (0)       | 20 |
| Met II        | F1M6W2_RAT | F1M6W2 | Endoplasmic reticulum metalloproteinase 1                        | Ermp1     | H (1) M (1) R (1) | 8  |
| Met II        | F1M779_RAT | F1M779 | Clathrin heavy chain                                             | Cltc      | H (3) M (3) R (3) | 77 |
| Met II        | F1M790_RAT | F1M790 | Prostaglandin F2 receptor negative regulator                     | Ptgfrn    | H (1) M (1) R (1) | 9  |
| Met I; Met II | F1M7T6_RAT | F1M7T6 | Translocon-associated protein subunit gamma                      | Ssr3      | H (1) M (1)       | 19 |
| Met I         | F1M8X9_RAT | F1M8X9 | Golgi brefeldin A-resistant guanine nucleotide exchange factor 1 | Gbf1      | H (0)             | 1  |
| Met II        | F1MA50_RAT | F1MA50 | transmembrane protein 123                                        | Tmem123   | H (0) M (0)       | 2  |
| Met II        | F1MA89_RAT | F1MA89 | Cyclin Y                                                         | Ccny      | H (1) M (1)       | 20 |
| Met I         | F7EPH4_RAT | F7EPH4 | Inorganic Pyrophosphatase                                        | Ppa1      | H (0)             | 3  |

|               |            |        |                                                             |              |                   |     |
|---------------|------------|--------|-------------------------------------------------------------|--------------|-------------------|-----|
| Met I         | F7EWC1_RAT | F7EWC1 | Vasodilator-stimulated phosphoprotein                       | Vasp         | H (0) M (0)       | 13  |
| Met I; Met II | F7F4S8_RAT | B2RYB8 | Integrin beta 2                                             | Itgb2        | H (0) M (0)       | 15  |
| Met II        | F7F744_RAT | Q6S395 | Plectin                                                     | Plec         | H (3) M (3) R (3) | 50  |
| Met I; Met II | F7FFV2_RAT | F7FFV2 | keratin 5                                                   | Krt5         | H (0) M (1) R (1) | 38  |
| Met II        | F7FKI5_RAT | F7FKI5 | Pyruvate dehydrogenase component E1 alpha                   | Pdha1        | H (1) M (1) R (1) | 11  |
| Met II        | F7FNS3_RAT | F7FNS3 | Derlin                                                      | Derl1        | H (0) M (0)       | 9   |
| Met II        | FACR1_RAT  | Q66H50 | Fatty acyl-CoA reductase 1                                  | Far1         | H (0) M (0)       | 4   |
| Met II        | FAF2_RAT   | Q5BK32 | FAS-associated factor 2                                     | Faf2         | H (1) M (1) R (1) | 25  |
| Met II        | FAM3C_RAT  | Q810F4 | Protein FAM3C                                               | Fam3c        | H (1) M (1)       | 16  |
| Met II        | FCERG_RAT  | P20411 | High affinity immunoglobulin epsilon receptor subunit gamma | Fcer1g       | H (0) M (0)       | 7   |
| Met I         | FEN1_RAT   | Q5XIP6 | Flap endonuclease 1                                         | Fen1         | H (0) M (0)       | 3   |
| Met I; Met II | FGR_RAT    | Q6P6U0 | Tyrosine-protein kinase Fgr                                 | Fgr          | H (0) M (0)       | 6   |
| Met II        | FIS1_RAT   | P84817 | Mitochondrial fission 1 protein                             | Fis1         | H (1) M (1) R (1) | 15  |
| Met I         | FKB1A_RAT  | Q62658 | Peptidyl-prolyl cis-trans isomerase FKBP1A                  | Fkbp1a       | H (0)             | 5   |
| Met II        | FKBP8_RAT  | Q3B7U9 | Peptidyl-prolyl cis-trans isomerase FKBP8                   | Fkbp8        | H (1) M (1) R (1) | 15  |
| Met II        | FLOT1_RAT  | Q9Z1E1 | Flotillin-1                                                 | Flot1        | H (3) M (1) R (3) | 101 |
| Met II        | FLOT2_RAT  | Q9Z2S9 | Flotillin-2                                                 | Flot2        | H (3) M (3) R (3) | 90  |
| Met I         | FPPS_RAT   | P05369 | Farnesyl pyrophosphate synthase                             | Fdps         | H (0)             | 9   |
| Met II        | FRK_RAT    | Q62662 | Tyrosine-protein kinase FRK                                 | Frk          | H (0)             | 1   |
| Met II        | FUT8_RAT   | Q6EV76 | Alpha-(1,6)-fucosyltransferase                              | Fut8         | H (0) M (0)       | 3   |
| Met I; Met II | G3P_RAT    | P04797 | Glyceraldehyde-3-phosphate dehydrogenase                    | Gapdh        | H (1) M (1) R (1) | 88  |
| Met II        | G3PT_RAT   | Q9ESV6 | Glyceraldehyde-3-phosphate dehydrogenase testis-specific    | Gapdhs       | H (0)             | 2   |
| Met II        | G3V667_RAT | G3V667 | Integrin alpha 6                                            | Itga6        | H (1) M (1)       | 24  |
| Met I; Met II | G3V679_RAT | G3V679 | Transferrin receptor protein 1                              | Tfrc         | H (1) M (1) R (1) | 51  |
| Met I; Met II | G3V6D3_RAT | G3V6D3 | ATP synthase subunit beta                                   | Atp5f1b      | H (1)             | 3   |
| Met II        | G3V6H0_RAT | G3V6H0 | Ras-related protein Rab-1b                                  | LOC100363782 | H (3) M (1) R (1) | 56  |
| Met II        | G3V6H5_RAT | G3V6H5 | Solute carrier family 25 member 11                          | Slc25a11     | H (1) M (1) R (1) | 38  |
| Met II        | G3V6N2_RAT | G3V6N2 | Transmembrane emp24 domain-containing protein 4             | Tmed4        | H (1) M (1)       | 7   |
| Met I; Met II | G3V6P7_RAT | G3V6P7 | Myosin heavy chain 9                                        | Myh9         | H (3) M (3)       | 83  |
| Met I; Met II | G3V6P8_RAT | G3V6P8 | Guanine nucleotide-binding protein gamma-12                 | Gng12        | H (3) M (3)       | 45  |
| Met II        | G3V6R4_RAT | G3V6R4 | Leucine-rich repeat-containing protein 1                    | Lrrc1        | H (1)             | 6   |
| Met II        | G3V6T1_RAT | G3V6T1 | Coatamer subunit alpha                                      | Copa         | H (1) M (1)       | 21  |
| Met I         | G3V6T7_RAT | G3V6T7 | Protein disulfide-isomerase A4                              | Pdia4        | H (1) M (1)       | 23  |
| Met I; Met II | G3V6W2_RAT | G3V6W2 | Prolactin regulatory element-binding protein                | Preb         | H (0) M (0)       | 8   |
| Met I; Met II | G3V741_RAT | G3V741 | Solute carrier family 25 member 3                           | Slc25a3      | H (3) M (3) R (3) | 60  |
| Met II        | G3V784_RAT | G3V784 | ADP-dependent glucokinase                                   | Adpgk        | H (0) M (0)       | 7   |
| Met II        | G3V7I0_RAT | G3V7I0 | Peroxisomal oxidoreductase 3                                | Prdx3        | H (1) R (1)       | 24  |
| Met II        | G3V7I3_RAT | G3V7I3 | Manganese-transporting ATPase 13A1                          | Atp13a1      | H (0) M (0)       | 18  |
| Met I         | G3V7J7_RAT | G3V7J7 | Eukaryotic translation initiation factor 5A-2               | Eif5a2       | H (0)             | 1   |
| Met II        | G3V7N0_RAT | G3V7N0 | Heparan sulfate 2-O-sulfotransferase 1                      | Hs2st1       | H (0) M (0)       | 9   |
| Met II        | G3V7N6_RAT | G3V7N6 | Lysophospholipid acyltransferase 7                          | Mboat7l1     | H (0) M (0)       | 24  |
| Met I; Met II | G3V7Q7_RAT | G3V7Q7 | Ras GTPase-activating-like protein IQGAP1                   | Iqgap1       | H (1) M (1)       | 36  |
| Met II        | G3V7U6_RAT | G3V7U6 | Calpain 5                                                   | Capn5        | H (0) M (0)       | 25  |
| Met II        | G3V7Y9_RAT | P28494 | Alpha-mannosidase 2                                         | Man2a1       | H (0) M (0)       | 3   |



|               |            |        |                                                                     |         |                   |    |
|---------------|------------|--------|---------------------------------------------------------------------|---------|-------------------|----|
| Met I         | G3V852_RAT | G3V852 | Talin-1                                                             | Tln1    | H (3) M (3)       | 34 |
| Met II        | G3V878_RAT | G3V878 | Signal peptidase complex catalytic subunit SEC11                    | Sec11c  | M (1)             | 2  |
| Met II        | G3V887_RAT | G3V887 | V-type proton ATPase subunit A                                      | Tcirg1  | H (2) M (2)       | 12 |
| Met I         | G3V8A5_RAT | G3V8A5 | Vacuolar protein sorting-associated protein 35                      | Vps35   | H (1) M (1)       | 10 |
| Met I         | G3V8C4_RAT | G3V8C4 | Chloride intracellular channel protein 4                            | Clic4   | M (1)             | 1  |
| Met II        | G3V8F5_RAT | G3V8F5 | Mitochondrial import receptor subunit TOM40 homolog                 | Tomm40  | H (3) M (3) R (3) | 36 |
| Met I; Met II | G3V8G5_RAT | G3V8G5 | Golgi apparatus protein 1                                           | Glg1    | H (1) M (1) R (1) | 34 |
| Met II        | G3V8L7_RAT | G3V8L7 | Integrin alpha M                                                    | Itgam   | M (1)             | 2  |
| Met II        | G3V8Q1_RAT | G3V8Q1 | Coatomer subunit epsilon                                            | Cope    | H (0) M (0)       | 3  |
| Met II        | G3V8V4_RAT | G3V8V4 | Ceramide synthase 2                                                 | Cers2   | H (0) M (0)       | 8  |
| Met II        | G3V8Z1_RAT | G3V8Z1 | Linker for activation of T-cells family member 2 (NTAL)             | Lat2    | H (1) M (1) R (1) | 10 |
| Met II        | G3V964_RAT | G3V964 | Neurotrimin                                                         | Ntm     | H (1) M (1) R (1) | 22 |
| Met I         | G3V9A3_RAT | G3V9A3 | 14-3-3 protein sigma                                                | Sfn     | H (0) M (0)       | 11 |
| Met II        | G3V9N0_RAT | G3V9N0 | Polyadenylate-binding protein 4                                     | Pabpc4  | H (1)             | 9  |
| Met II        | G3V9N9_RAT | G3V9N9 | alpha-1,2-Mannosidase                                               | Man1a1  | H (0) M (0)       | 1  |
| Met II        | G3V9S3_RAT | G3V9S3 | Tyrosine-protein phosphatase non-receptor type 13                   | Ptpn13  | H (0) M (0)       | 3  |
| Met I; Met II | G3V9U7_RAT | G3V9U7 | Sarcoplasmic/endoplasmic reticulum calcium ATPase 3 (SERCA3)        | Atp2a3  | H (0) M (0)       | 13 |
| Met II        | G3V9W2_RAT | G3V9W2 | Tyrosine-protein kinase JAK1                                        | Jak1    | H (0) M (0)       | 11 |
| Met II        | G3V9X8_RAT | G3V9X8 | Magnesium transporter protein 1                                     | Magt1   | H (1) M (1)       | 6  |
| Met II        | G3V9Y2_RAT | G3V9Y2 | Phospholipid phosphatase 1                                          | Plpp1   | H (0) M (0)       | 17 |
| Met II        | GALT1_RAT  | Q10473 | Polypeptide N-acetylgalactosaminyltransferase 1                     | Galnt1  | H (1) M (1)       | 6  |
| Met II        | GALT7_RAT  | Q9R0C5 | Polypeptide N-acetylgalactosaminyltransferase 7                     | Galnt7  | H (1)             | 6  |
| Met I; Met II | GBB1_RAT   | P54311 | Transducin beta-1                                                   | Gnb1    | H (3) M (3) R (3) | 87 |
| Met I; Met II | GBB2_RAT   | P54313 | Transducin beta-2                                                   | Gnb2    | H (3) M (3) R (3) | 76 |
| Met II        | GBB4_RAT   | O35353 | Transducin beta-4                                                   | Gnb4    | H (3) M (3) R (3) | 34 |
| Met I         | GDIA_RAT   | P50398 | Rab GDP dissociation inhibitor alpha                                | Gdi1    | H (1) M (1) R (1) | 12 |
| Met I         | GDIB_RAT   | P50399 | Rab GDP dissociation inhibitor beta                                 | Gdi2    | H (0) M (1) R (1) | 15 |
| Met I         | GDIR1_RAT  | Q5XI73 | Rho GDP dissociation inhibitor 1                                    | Arhgdia | H (0) M (1)       | 19 |
| Met I         | GELS_RAT   | Q68FP1 | Gelsolin                                                            | Gsn     | H (3) M (3)       | 37 |
| Met I; Met II | GFAP_RAT   | P47819 | Glial fibrillary acidic protein                                     | Gfap    | H (1) M (1) R (1) | 14 |
| Met II        | GHITM_RAT  | Q5XIA8 | Growth hormone-inducible transmembrane protein                      | Ghitm   | H (0) M (0)       | 6  |
| Met II        | GL8D1_RAT  | Q6AYF6 | Glycosyltransferase 8 domain-containing protein 1                   | Glt8d1  | H (0)             | 2  |
| Met I         | GLOD4_RAT  | Q5I0D1 | Glyoxalase domain-containing protein 4                              | Glod4   | H (0)             | 3  |
| Met II        | GNA11_RAT  | Q9JID2 | Guanine nucleotide-binding protein alpha-11                         | Gna11   | H (1) M (1) R (1) | 43 |
| Met I; Met II | GNAI2_RAT  | P04897 | Guanine nucleotide-binding protein G(i) subunit alpha-2             | Gnai2   | H (3) M (3) R (3) | 86 |
| Met I; Met II | GNAI3_RAT  | P08753 | Guanine nucleotide-binding protein G(k) subunit alpha               | Gnai3   | H (3) M (3) R (3) | 66 |
| Met II        | GNAQ_RAT   | P82471 | Guanine nucleotide-binding protein G(q) subunit alpha               | Gnaq    | H (1) M (1) R (1) | 70 |
| Met I         | GNAS1_RAT  | Q63803 | Guanine nucleotide-binding protein G(s) subunit alpha isoforms XLas | Gnas    | H (3) M (3)       | 28 |
| Met I; Met II | GNAS2_RAT  | P63095 | Guanine nucleotide-binding protein G(s) subunit alpha               | Gnas    | H (3) M (3) R (3) | 32 |
| Met I; Met II | GNAZ_RAT   | P19627 | Guanine nucleotide-binding protein G(z) subunit alpha               | Gnaz    | H (1) M (1) R (1) | 20 |
| Met II        | GOGA2_RAT  | Q62839 | Golgin subfamily A member 2                                         | Golga2  | H (0)             | 1  |
| Met II        | GOGA7_RAT  | Q6AYQ1 | Golgin subfamily A member 7                                         | Golga7  | H (1) M (1) R (1) | 18 |
| Met II        | GOLI4_RAT  | Q5BJK8 | Golgi integral membrane protein 4                                   | Golim4  | H (0) M (0)       | 7  |
| Met II        | GOSR2_RAT  | O35165 | Golgi SNAP receptor complex member 2                                | Gosr2   | H (0) M (0) R (0) | 8  |

|               |           |        |                                                                   |                         |                   |     |
|---------------|-----------|--------|-------------------------------------------------------------------|-------------------------|-------------------|-----|
| Met I; Met II | GPDM_RAT  | P35571 | Glycerol-3-phosphate dehydrogenase mitochondrial                  | Gpd2                    | H (1) M (1) R (1) | 21  |
| Met II        | GPSM3_RAT | Q6MG88 | G-protein-signaling modulator 3                                   | Gpsm3                   | H (0) M (0)       | 9   |
| Met I; Met II | GRP75_RAT | P48721 | Mortalin                                                          | Hspa9                   | H (3) M (3) R (3) | 64  |
| Met I; Met II | GRP78_RAT | P06761 | Endoplasmic reticulum chaperone BiP                               | Hspa5                   | H (1) M (1) R (1) | 86  |
| Met I; Met II | GTR1_RAT  | P11167 | Solute carrier family 2, facilitated glucose transporter member 1 | Slc2a1                  | H (3) M (3) R (3) | 41  |
| Met I; Met II | GTR3_RAT  | Q07647 | Solute carrier family 2, facilitated glucose transporter member 3 | Slc2a3                  | H (1) M (1) R (1) | 15  |
| Met I; Met II | H14_RAT   | P15865 | Histone H1.4                                                      | Hist1h1e                | H (0) M (0)       | 23  |
| Met I; Met II | H4_RAT    | P62804 | Histone H4                                                        | st1h4b; Hist1h4m; Hist4 | H (3) M (3) R (3) | 45  |
| Met II        | HA12_RAT  | P16391 | RT1 class I histocompatibility antigen AA alpha chain             | ---                     | R (1)             | 5   |
| Met I         | HAP28_RAT | Q62785 | 28 kDa heat- and acid-stable phosphoprotein                       | Pdap1                   | H (0) M (0)       | 12  |
| Met II        | HMOX1_RAT | P06762 | Heme oxygenase 1                                                  | Hmox1                   | H (1) M (1) R (1) | 22  |
| Met II        | HMOX2_RAT | P23711 | Heme oxygenase 2                                                  | Hmox2                   | H (1) M (1) R (1) | 23  |
| Met II        | HNRPF_RAT | Q794E4 | Heterogeneous nuclear ribonucleoprotein F                         | Hnrnpf                  | H (1) M (1)       | 18  |
| Met I; Met II | HS90A_RAT | P82995 | Heat shock protein HSP 90-alpha                                   | Hsp90aa1                | H (1) M (1) R (1) | 56  |
| Met I; Met II | HS90B_RAT | P34058 | Heat shock protein HSP 90-beta                                    | Hsp90ab1                | H (3) M (3) R (3) | 64  |
| Met I; Met II | HSP72_RAT | P14659 | Heat shock-related 70 kDa protein 2                               | Hspa2                   | H (1) M (1) R (1) | 16  |
| Met I         | HSP74_RAT | O88600 | Heat shock 70 kDa protein 4                                       | Hspa4                   | H (0) M (0)       | 15  |
| Met II        | HSP7C_RAT | P63018 | Heat shock cognate 71 kDa protein                                 | Hspa8                   | H (3) M (3) R (3) | 102 |
| Met I         | HXK1_RAT  | P05708 | Hexokinase-1                                                      | Hk1                     | H (1) M (1) R (1) | 22  |
| Met I         | HXK2_RAT  | P27881 | Hexokinase-2                                                      | Hk2                     | R (1)             | 3   |
| Met II        | ICAM1_RAT | Q00238 | Intercellular adhesion molecule 1 (ICAM1)                         | Icam1                   | H (1) M (1)       | 13  |
| Met I; Met II | IF4A2_RAT | Q5RKI1 | Eukaryotic initiation factor 4A-II                                | Eif4a2                  | H (0) M (0) R (0) | 6   |
| Met I         | IF4A3_RAT | Q3B8Q2 | Eukaryotic initiation factor 4A-III                               | Eif4a3                  | H (1) M (0)       | 10  |
| Met I         | IF5A1_RAT | Q3T1J1 | Eukaryotic translation initiation factor 5A-1                     | Eif5a                   | H (0) M (0)       | 16  |
| Met I         | IF6_RAT   | Q3KRD8 | Eukaryotic translation initiation factor 6                        | Eif6                    | H (0)             | 1   |
| Met II        | IKIP_RAT  | Q5EAJ6 | Inhibitor kappa-B kinase-interacting protein                      | Ikbip                   | H (1)             | 14  |
| Met I         | ILEUA_RAT | Q4G075 | Leukocyte elastase inhibitor                                      | Serpinb1a               | H (0)             | 6   |
| Met I; Met II | ILRL1_RAT | Q62611 | Interleukin 1 receptor-like 1                                     | Il1rl1                  | M (0)             | 1   |
| Met I; Met II | IMB1_RAT  | P52296 | Importin subunit beta-1                                           | Kpnb1                   | H (1) M (1) R (1) | 47  |
| Met I; Met II | IMMT_RAT  | Q3KR86 | MICOS complex subunit Mic60                                       | Immt                    | H (3) M (3) R (3) | 64  |
| Met II        | IMPA3_RAT | D4AD37 | Inositol monophosphatase 3                                        | Impad1                  | H (1) M (1)       | 4   |
| Met II        | IR3IP_RAT | P85007 | Immediate early response 3-interacting protein 1                  | Ier3ip1                 | H (1) M (1) R (1) | 7   |
| Met II        | ITB1_RAT  | P49134 | Integrin beta 1                                                   | Itgb1                   | H (1) M (1) R (1) | 61  |
| Met I; Met II | ITFG3_RAT | Q5M7W6 | Protein FAM234A                                                   | Fam234a                 | H (1) M (1) R (1) | 7   |
| Met II        | ITM2B_RAT | Q5XIE8 | Integral membrane protein 2B                                      | Itm2b                   | H (1) M (1)       | 16  |
| Met I; Met II | ITM2C_RAT | Q5PQL7 | Integral membrane protein 2C                                      | Itm2c                   | H (1) M (1) R (1) | 6   |
| Met II        | ITPR2_RAT | P29995 | Inositol 1,4,5-trisphosphate receptor type 2                      | Itpr2                   | H (0)             | 6   |
| Met II        | ITPR3_RAT | Q63269 | Inositol 1,4,5-trisphosphate receptor type 3                      | Itpr3                   | H (1) M (1)       | 12  |
| Met I; Met II | K1C10_RAT | Q6IFW6 | Keratin, type I cytoskeletal 10                                   | Krt10                   | H (1) M (1) R (1) | 47  |
| Met I; Met II | K1C14_RAT | Q6IFV1 | Keratin, type I cytoskeletal 14                                   | Krt14                   | H (1) M (1)       | 26  |
| Met I; Met II | K1C15_RAT | Q6IFV3 | Keratin, type I cytoskeletal 15                                   | Krt15                   | H (0) M (0) R (0) | 4   |
| Met I; Met II | K1C17_RAT | Q6IFU8 | Keratin, type I cytoskeletal 17                                   | Krt17                   | H (0) M (0)       | 11  |
| Met II        | K1C18_RAT | Q5BJY9 | Keratin, type I cytoskeletal 18                                   | Krt18                   | H (1) M (1)       | 18  |
| Met II        | K1C42_RAT | Q6IFU7 | Keratin, type I cytoskeletal 42                                   | Krt42                   | M (1)             | 2   |

|               |            |        |                                                                |         |                   |    |
|---------------|------------|--------|----------------------------------------------------------------|---------|-------------------|----|
| Met II        | K22E_RAT   | Q6IG02 | Keratin, type II cytoskeletal 2 epidermal                      | Krt2    | H (1) M (1)       | 35 |
| Met I; Met II | K2C1_RAT   | Q6IMF3 | Keratin, type II cytoskeletal 1                                | Krt1    | H (1) M (1) R (1) | 46 |
| Met I; Met II | K2C1B_RAT  | Q6IG01 | Keratin, type II cytoskeletal 1B                               | Krt77   | H (1)             | 8  |
| Met II        | K2C4_RAT   | Q6IG00 | Keratin, type II cytoskeletal 4                                | Krt4    | H (0)             | 2  |
| Met I         | K2C5_RAT   | Q6P6Q2 | Keratin, type II cytoskeletal 5                                | Krt5    | H (1) M (1) R (1) | 38 |
| Met I; Met II | K2C6A_RAT  | Q4FZU2 | Keratin, type II cytoskeletal 6A                               | Krt6a   | H (0) M (0)       | 15 |
| Met II        | K2C7_RAT   | Q6IG12 | Keratin, type II cytoskeletal 7                                | Krt7    | H (1)             | 6  |
| Met I; Met II | K2C73_RAT  | Q6IG03 | Keratin, type II cytoskeletal 73                               | Krt73   | M (0)             | 1  |
| Met I; Met II | K2C75_RAT  | Q6IG05 | Keratin, type II cytoskeletal 75                               | Krt75   | H (0)             | 4  |
| Met I; Met II | K2C8_RAT   | Q10758 | Keratin, type II cytoskeletal 8                                | Krt8    | H (1) M (1)       | 23 |
| Met I         | KAP0_RAT   | P09456 | cAMP-dependent protein kinase type I-alpha regulatory subunit  | Prkar1a | H (1) M (0) R (1) | 20 |
| Met II        | KAP2_RAT   | P12368 | cAMP-dependent protein kinase type II-alpha regulatory subunit | Prkar2a | H (1) M (1) R (1) | 17 |
| Met II        | KC1G1_RAT  | Q62761 | Casein kinase I isoform gamma-1                                | Csnk1g1 | H (1) M (1)       | 10 |
| Met II        | KC1G2_RAT  | Q62762 | Casein kinase I isoform gamma-2                                | Csnk1g2 | H (3) M (3)       | 16 |
| Met II        | KC1G3_RAT  | Q62763 | Casein kinase I isoform gamma-3                                | Csnk1g3 | H (1) R (1)       | 12 |
| Met I         | KCY_RAT    | Q4KM73 | UMP-CMP kinase                                                 | Cmpk1   | H (0)             | 8  |
| Met I; Met II | KPYM_RAT   | P11980 | Pyruvate kinase PKM                                            | Pkm     | H (3) M (3) R (3) | 64 |
| Met I         | KPYR_RAT   | P12928 | Pyruvate kinase PKLR                                           | Pklr    | H (0) M (0)       | 5  |
| Met II        | LAMP1_RAT  | P14562 | Lysosome-associated membrane glycoprotein 1 (Lamp1)            | Lamp1   | H (1) M (1) R (1) | 45 |
| Met II        | LAMP2_RAT  | P17046 | Lysosome-associated membrane glycoprotein 2 (Lamp2)            | Lamp2   | H (1) M (1) R (1) | 26 |
| Met I; Met II | LAP2_RAT   | Q62733 | Lamina-associated polypeptide 2 isoform beta                   | Tmpo    | H (1)             | 21 |
| Met I; Met II | LAT_RAT    | O70601 | Linker for activation of T-cells family member 1 (LAT)         | Lat     | H (0) R (0)       | 10 |
| Met II        | LAT1_RAT   | Q63016 | Large neutral amino acids transporter small subunit 1          | Slc7a5  | H (1) M (1) R (1) | 31 |
| Met II        | LBR_RAT    | O08984 | Lamin-B receptor                                               | Lbr     | H (0) M (0)       | 20 |
| Met I         | LCK_RAT    | Q01621 | Tyrosine-protein kinase LCK                                    | Lck     | H (1)             | 11 |
| Met I; Met II | LDHA_RAT   | P04642 | L-lactate dehydrogenase A chain                                | Ldha    | H (1) M (1) R (1) | 41 |
| Met II        | LDLR_RAT   | P35952 | Low-density lipoprotein receptor                               | Ldlr    | H (1) M (1)       | 3  |
| Met I         | LEG1_RAT   | P11762 | Galectin-1                                                     | Lgals1  | H (0) M (0)       | 33 |
| Met II        | LETM1_RAT  | Q5XIN6 | Mitochondrial proton/calcium exchanger protein                 | Letm1   | H (1) M (1) R (1) | 22 |
| Met II        | LEUK_RAT   | P13838 | Leukosialin                                                    | Spn     | H (0) M (0)       | 7  |
| Met II        | LMAN1_RAT  | Q62902 | Lectin mannose-binding 1                                       | Lman1   | H (1) M (1) R (1) | 36 |
| Met II        | LMBD1_RAT  | Q6AZ61 | Probable lysosomal cobalamin transporter                       | Lmbrd1  | M (0)             | 1  |
| Met II        | LMF2_RAT   | A1L1J9 | Lipase maturation factor 2                                     | Lmf2    | H (0) M (0)       | 5  |
| Met I; Met II | LPPRC_RAT  | Q5SGE0 | Leucine-rich PPR motif-containing protein mitochondrial        | Lrpprc  | H (1) R (1)       | 14 |
| Met I; Met II | LRC59_RAT  | Q5RJR8 | Leucine-rich repeat-containing protein 59                      | Lrrc59  | H (1) M (1) R (1) | 56 |
| Met I; Met II | LTOR1_RAT  | Q6P791 | Ragulator complex protein LAMTOR1                              | Lamtor1 | H (3) M (3) R (3) | 65 |
| Met II        | LTOR3_RAT  | Q5U204 | Ragulator complex protein LAMTOR3                              | Lamtor3 | H (3) M (3) R (3) | 37 |
| Met I; Met II | LYN_RAT    | Q07014 | Tyrosine-protein kinase Lyn                                    | Lyn     | H (1) M (1) R (1) | 47 |
| Met II        | M0R402_RAT | M0R402 | Protein disulfide-isomerase TMX3                               | Tmx3    | H (1) M (1)       | 3  |
| Met I         | M0R5K9_RAT | M0R5K9 | 40S ribosomal protein S18                                      | ---     | H (1) M (1) R (1) | 44 |
| Met I         | M0R9L0_RAT | M0R9L0 | Nascent polypeptide-associated complex subunit alpha           | Naca    | H (1) M (1)       | 16 |
| Met II        | M0RAJ8_RAT | M0RAJ8 | 40S ribosomal protein S2                                       | ---     | H (1)             | 25 |
| Met I         | M0RAU0_RAT | M0RAU0 | Advanced glycosylation end product-specific receptor           | Ager    | M (0)             | 4  |
| Met II        | M0RBJ0_RAT | M0RBJ0 | Guanine nucleotide-binding protein gamma-2                     | Gng2    | H (0) M (0)       | 17 |

|               |            |        |                                                                        |          |                   |    |
|---------------|------------|--------|------------------------------------------------------------------------|----------|-------------------|----|
| Met II        | M0RC99_RAT | M0RC99 | Ras-related protein Rab-5a                                             | Rab5a    | H (1) M (1) R (1) | 24 |
| Met II        | M0RCF3_RAT | M0RCF3 | Integrin beta 3                                                        | Itgb3    | H (1) M (1)       | 13 |
| Met II        | M0RCS2_RAT | M0RCS2 | Transducin beta-like protein 2                                         | Tbl2     | H (1) M (1)       | 12 |
| Met II        | M0RD75_RAT | M0RD75 | 40S ribosomal protein S6                                               | Rps6     | H (1) M (1)       | 33 |
| Met II        | M0RDI5_RAT | M0RDI5 | Mitochondrial calcium uniporter                                        | Mcu      | H (0) M (0)       | 14 |
| Met I         | MAK_RAT    | P20793 | Serine/threonine-protein kinase MAK                                    | Mak      | M (0)             | 1  |
| Met I         | MANF_RAT   | P0C5H9 | Mesencephalic astrocyte-derived neurotrophic factor                    | Manf     | H (0)             | 6  |
| Met I         | MARE1_RAT  | Q66HR2 | Microtubule-associated protein RP/EB family member 1                   | Mapre1   | H (0) M (0)       | 14 |
| Met II        | MAVS_RAT   | Q66HG9 | Mitochondrial antiviral-signaling protein                              | Mavs     | H (1) M (1) R (1) | 14 |
| Met II        | MBOA5_RAT  | Q5FVN0 | Lysophospholipid acyltransferase 5                                     | Lpcat3   | M (0) R (0)       | 5  |
| Met I         | MDHC_RAT   | O88989 | Malate dehydrogenase cytoplasmic                                       | Mdh1     | H (1) M (1) R (1) | 17 |
| Met I; Met II | MDHM_RAT   | P04636 | Malate dehydrogenase mitochondrial                                     | Mdh2     | H (1) M (1) R (1) | 48 |
| Met II        | MGAT2_RAT  | Q09326 | Alpha-1,6-mannosyl-glycoprotein 2-beta-N-acetylglucosaminyltransferase | Mgat2    | H (0)             | 1  |
| Met II        | MIRO2_RAT  | Q7TSA0 | Mitochondrial Rho GTPase 2                                             | Rhot2    | H (1) R (1)       | 10 |
| Met I         | MK03_RAT   | P21708 | Mitogen-activated protein kinase 3                                     | Mapk3    | H (0)             | 1  |
| Met II        | MLEC_RAT   | Q5FVQ4 | Malectin                                                               | Mlec     | H (1) M (1) R (1) | 36 |
| Met II        | MMGT1_RAT  | B5DF51 | Membrane magnesium transporter 1                                       | Mmgt1    | H (0)             | 2  |
| Met II        | MOGS_RAT   | O88941 | Mannosyl-oligosaccharide glucosidase                                   | Mogs     | H (1) M (1)       | 8  |
| Met II        | MOSC2_RAT  | O88994 | Mitochondrial amidoxime reducing component 2                           | Marc2    | H (1) M (1) R (1) | 10 |
| Met I; Met II | MOT1_RAT   | P53987 | Monocarboxylate transporter 1                                          | Slc16a1  | H (1) M (1) R (1) | 31 |
| Met I         | MPRD_RAT   | Q6AY20 | Cation-dependent mannose-6-phosphate receptor                          | M6pr     | H (1) M (1) R (1) | 18 |
| Met II        | MRLCA_RAT  | P13832 | Myosin regulatory light chain RLC-A                                    | Rlc-a    | R (2)             | 2  |
| Met II        | MSMO1_RAT  | O35532 | Methylsterol monooxygenase 1                                           | Msmo1    | H (0) R(1)        | 2  |
| Met I         | MTPN_RAT   | P62775 | Myotrophin                                                             | Mtpn     | H (0) M (0)       | 11 |
| Met II        | MYH10_RAT  | Q9JLT0 | Myosin heavy chain 10                                                  | Myh10    | H (3) M (3) R (3) | 43 |
| Met I; Met II | MYL6_RAT   | Q64119 | Myosin light polypeptide 6                                             | Myl6     | H (1) M (1) R (1) | 55 |
| Met II        | NB5R3_RAT  | P20070 | NADH-cytochrome b5 reductase 3                                         | Cyb5r3   | H (1) M (1) R (1) | 69 |
| Met I         | NCF2_RAT   | A7E3N2 | Neutrophil cytosol factor 2                                            | Ncf2     | H (0)             | 1  |
| Met II        | NCLN_RAT   | Q5XIA1 | Nicalin                                                                | Ncln     | H (1) M (1) R (1) | 10 |
| Met I; Met II | NCPR_RAT   | P00388 | NADPH--cytochrome P450 reductase                                       | Por      | H (1) M (1) R (1) | 40 |
| Met I         | NDKA_RAT   | Q05982 | Nucleoside diphosphate kinase A                                        | Nme1     | H (1) M (1) R (1) | 16 |
| Met I         | NDKB_RAT   | P19804 | Nucleoside diphosphate kinase B                                        | Nme2     | H (1) M (1) R (1) | 16 |
| Met II        | NDUAA_RAT  | Q561S0 | NADH dehydrogenase [ubiquinone] 1 alpha subcomplex subunit 10          | Ndufa10  | H (1) M (1)       | 43 |
| Met I; Met II | NDUS1_RAT  | Q66HF1 | NADH-ubiquinone oxidoreductase 75 kDa subunit mitochondrial            | Ndufs1   | H (3) M (3) R (3) | 54 |
| Met II        | NDUS2_RAT  | Q641Y2 | NADH dehydrogenase [ubiquinone] iron-sulfur protein 2                  | Ndufs2   | H (1) M (1) R (1) | 33 |
| Met I; Met II | NDUV2_RAT  | P19234 | NADH dehydrogenase [ubiquinone] flavoprotein 2 mitochondrial           | Ndufv2   | H (1) M (1) R (1) | 42 |
| Met I         | NEDD4_RAT  | Q62940 | E3 ubiquitin-protein ligase NEDD4                                      | Nedd4    | M (0)             | 4  |
| Met I         | NHRF1_RAT  | Q9JJ19 | Na(+)/H(+) exchange regulatory cofactor NHE-RF1                        | Slc9a3r1 | H (1)             | 9  |
| Met I; Met II | NICA_RAT   | Q8CGU6 | Nicastrin                                                              | Ncstn    | H (3) M (3) R (3) | 21 |
| Met I         | NP1L4_RAT  | Q5U2Z3 | Nucleosome assembly protein 1-like 4                                   | Nap1l4   | H (0)             | 2  |
| Met I         | NPM_RAT    | P13084 | Nucleophosmin                                                          | Npm1     | H (1) M (1) R (1) | 47 |
| Met II        | NPTN_RAT   | P97546 | Neuroplastin                                                           | Nptn     | H (1) M (1) R (1) | 24 |
| Met I         | NSDHL_RAT  | Q5PPL3 | Sterol-4-alpha-carboxylate 3-dehydrogenase decarboxylating             | Nsdhl    | H (1) M (1) R (1) | 8  |
| Met I         | NSF1C_RAT  | O35987 | NSFL1 cofactor p47                                                     | Nsfl1c   | H (0)             | 5  |

|               |            |        |                                                                         |          |                   |    |
|---------------|------------|--------|-------------------------------------------------------------------------|----------|-------------------|----|
| Met I         | NTF2_RAT   | P61972 | Nuclear transport factor 2                                              | Nutf2    | H (0)             | 1  |
| Met II        | NUCB1_RAT  | Q63083 | Nucleobindin-1                                                          | Nucb1    | H (1) R (1)       | 11 |
| Met II        | NUCB2_RAT  | Q9JI85 | Nucleobindin-2                                                          | Nucb2    | H (1)             | 5  |
| Met I; Met II | NUCL_RAT   | P13383 | Nucleolin                                                               | Ncl      | H (0) M (0)       | 38 |
| Met II        | O89035_RAT | O89035 | Solute carrier family 25 member 10                                      | Slc25a10 | H (1) M (1) R (1) | 13 |
| Met II        | OCAD1_RAT  | Q5XIG4 | OCIA domain-containing protein 1                                        | Ociad1   | H (1) R (1)       | 18 |
| Met II        | ODO1_RAT   | Q5XI78 | 2-oxoglutarate dehydrogenase complex component E1                       | Ogdh     | H (1) M (1) R (1) | 37 |
| Met II        | ODO2_RAT   | Q01205 | 2-oxoglutarate dehydrogenase complex component E2                       | Dlst     | H (1) M (1) R (1) | 46 |
| Met I; Met II | ODP2_RAT   | P08461 | Pyruvate dehydrogenase component E2                                     | Dlat     | H (1) M (1) R (1) | 21 |
| Met II        | ODPB_RAT   | P49432 | Pyruvate dehydrogenase component E1 beta                                | Pdhhb    | H (1) M (1) R (1) | 24 |
| Met II        | OGFD3_RAT  | Q5M843 | 2-oxoglutarate and iron-dependent oxygenase domain-containing protein 3 | Ogfod3   | M (0)             | 1  |
| Met I         | ORN_RAT    | Q5U1X1 | Oligoribonuclease mitochondrial                                         | Rexo2    | M (0)             | 2  |
| Met II        | OS9_RAT    | Q5RKH6 | Protein OS-9                                                            | Os9      | H (1)             | 2  |
| Met II        | OST48_RAT  | Q641Y0 | Oligosaccharyl transferase 48 kDa subunit                               | Ddost    | H (1) M (1) R (1) | 50 |
| Met I         | OTUB1_RAT  | B2RYG6 | Ubiquitin thioesterase OTUB1                                            | Otub1    | M (0)             | 1  |
| Met II        | P2RX4_RAT  | P51577 | P2X purinoceptor 4                                                      | P2rx4    | H (0) M (0)       | 6  |
| Met II        | P4K2B_RAT  | Q5XIL2 | Phosphatidylinositol 4-kinase type 2-beta                               | Pi4k2b   | M (0)             | 3  |
| Met II        | PABP1_RAT  | Q9EPH8 | Polyadenylate-binding protein 1                                         | Pabpc1   | H (1) M (1) R (1) | 34 |
| Met I         | PAIRB_RAT  | Q6AXS5 | Plasminogen activator inhibitor 1 RNA-binding protein                   | Serbp1   | H (1) M (1)       | 20 |
| Met I         | PARK7_RAT  | O88767 | Protein/nucleic acid deglycase DJ-1                                     | Park7    | H (1) M (1) R (1) | 15 |
| Met II        | PBIP1_RAT  | A2VD12 | Pre-B-cell leukemia transcription factor-interacting protein 1          | Pbxip1   | H (1) M (1) R (1) | 5  |
| Met I         | PCNA_RAT   | P04961 | Proliferating cell nuclear antigen                                      | Pcna     | H (0) M (0)       | 10 |
| Met I; Met II | PDIA1_RAT  | P04785 | Protein disulfide-isomerase                                             | P4hb     | H (1) M (1)       | 43 |
| Met I; Met II | PDIA3_RAT  | P11598 | Protein disulfide-isomerase A3                                          | Pdia3    | H (1) M (1) R (1) | 69 |
| Met I         | PDIA6_RAT  | Q63081 | Protein disulfide-isomerase A6                                          | Pdia6    | H (1) M (1) R (1) | 40 |
| Met I         | PEBP1_RAT  | P31044 | Phosphatidylethanolamine-binding protein 1                              | Pebp1    | H (0) M (1) R (0) | 19 |
| Met II        | PECA1_RAT  | Q3SWT0 | Platelet endothelial cell adhesion molecule (Pecam1)                    | Pecam1   | H (1) M (1) R (1) | 17 |
| Met I         | PGAM1_RAT  | P25113 | Phosphoglycerate mutase 1                                               | Pgam1    | H (1) M (1) R (1) | 33 |
| Met II        | PGFRB_RAT  | Q05030 | Platelet-derived growth factor receptor beta                            | Pdgfrb   | H (0) M (0)       | 10 |
| Met I         | PGH2_RAT   | P35355 | Prostaglandin G/H synthase 2                                            | Ptgs2    | M (0)             | 2  |
| Met I         | PGK1_RAT   | P16617 | Phosphoglycerate kinase 1                                               | Pgk1     | H (3) M (3) R (3) | 48 |
| Met I; Met II | PGRC1_RAT  | P70580 | Membrane-associated progesterone receptor component 1                   | Pgrmc1   | H (1) M (1) R (1) | 35 |
| Met II        | PGRC2_RAT  | Q5XIU9 | Membrane-associated progesterone receptor component 2                   | Pgrmc2   | H (1) M (1) R (1) | 19 |
| Met I; Met II | PHB_RAT    | P67779 | Prohibitin                                                              | Phb      | H (3) M (1) R (1) | 91 |
| Met I; Met II | PHB2_RAT   | Q5XIH7 | Prohibitin 2                                                            | Phb2     | H (3) M (3) R (3) | 71 |
| Met II        | PIGS_RAT   | Q5XI31 | GPI transamidase component PIG-S                                        | Pigs     | H (1) M (1) R (1) | 14 |
| Met II        | PLF4_RAT   | P06765 | Platelet factor 4                                                       | Pf4      | H (0)             | 8  |
| Met II        | PLP2_RAT   | Q6P742 | Proteolipid protein 2                                                   | Plp2     | H (1) M (1)       | 25 |
| Met I; Met II | PLS1_RAT   | P58195 | Phospholipid scramblase 1                                               | Plscr1   | H (1) M (1)       | 17 |
| Met II        | PLS3_RAT   | Q6QBQ4 | Phospholipid scramblase 3                                               | Plscr3   | H (1) M (1) R (1) | 10 |
| Met II        | PP1A_RAT   | P62138 | Serine/threonine-protein phosphatase PP1-alpha catalytic subunit        | Ppp1ca   | H (1) R (1)       | 17 |
| Met I         | PP2AA_RAT  | P63331 | Serine/threonine-protein phosphatase 2A catalytic subunit alpha isoform | Ppp2ca   | H (1) M (1)       | 4  |
| Met I; Met II | PPIA_RAT   | P10111 | Peptidyl-prolyl cis-trans isomerase A                                   | Ppia     | H (3) M (3) R (3) | 61 |
| Met I; Met II | PIIB_RAT   | P24368 | Peptidyl-prolyl cis-trans isomerase B                                   | Ppib     | H (1) M (1)       | 38 |

|               |            |        |                                                                                   |          |                   |    |
|---------------|------------|--------|-----------------------------------------------------------------------------------|----------|-------------------|----|
| Met I; Met II | PRAF3_RAT  | Q9ES40 | PRA1 family protein 3                                                             | Arl6ip5  | H (1) R (1)       | 14 |
| Met I; Met II | PRDX1_RAT  | Q63716 | Peroxisedoxin-1                                                                   | Prdx1    | H (1) M (1) R (1) | 62 |
| Met I         | PRDX2_RAT  | P35704 | Peroxisedoxin-2                                                                   | Prdx2    | H (1) M (1) R (0) | 44 |
| Met II        | PRDX3_RAT  | Q9Z0V6 | Thioredoxin-dependent peroxide reductase mitochondrial                            | Prdx3    | H (1) R (1)       | 12 |
| Met I; Met II | PROF1_RAT  | P62963 | Profilin-1                                                                        | Pfn1     | H (1) M (1) R (1) | 36 |
| Met II        | PSN1_RAT   | P97887 | Presenilin-1                                                                      | Psen1    | M (0)             | 2  |
| Met II        | PSN2_RAT   | O88777 | Presenilin-2                                                                      | Psen2    | H (1) M (1)       | 15 |
| Met II        | PTN1_RAT   | P20417 | Protein-tyrosine phosphatase 1B                                                   | Ptpn1    | H (0) M (0)       | 9  |
| Met II        | PTPRC_RAT  | P04157 | Receptor-type tyrosine-protein phosphatase C (CD45)                               | Ptprc    | H (1) M (1) R (1) | 13 |
| Met I         | PUR9_RAT   | O35567 | Bifunctional purine biosynthesis protein PURH                                     | Atic     | H (1) M (0)       | 5  |
| Met I         | PYGL_RAT   | P09811 | Glycogen phosphorylase liver form                                                 | Pygl     | H (0)             | 1  |
| Met II        | Q0R3W9_RAT | Q0R3W9 | GTPase, IMAF family member 1                                                      | Gimap1   | H (1)             | 3  |
| Met II        | Q2I6B1_RAT | Q2I6B1 | V-type proton ATPase subunit A2                                                   | Atp6v0a2 | H (0) M (0)       | 43 |
| Met I; Met II | Q2I6B2_RAT | Q2I6B2 | V-type proton ATPase subunit A1                                                   | Atp6v0a1 | H (3) M (3) R (3) | 61 |
| Met II        | Q2IBC7_RAT | Q2IBC7 | Hepatocyte growth factor receptor                                                 | Met      | H (0)             | 2  |
| Met I; Met II | Q32PX6_RAT | Q32PX6 | Rho-related GTP-binding protein RhoG                                              | Rhog     | H (1) M (1)       | 38 |
| Met II        | Q3B7V5_RAT | Q3B7V5 | Ras-related protein Rab-2b                                                        | Rab2b    | H (1)             | 14 |
| Met II        | Q3KRC3_RAT | Q3KRC3 | Signal recognition particle receptor alpha                                        | Srpra    | H (1) M (1)       | 10 |
| Met II        | Q3MHS9_RAT | Q3MHS9 | Chaperonin-containing TCP1 subunit 6A                                             | Cct6a    | M (1)             | 3  |
| Met II        | Q497A2_RAT | Q497A2 | Solute carrier family 35 member B2                                                | Slc35b2  | H (0)             | 12 |
| Met I; Met II | Q4KM97_RAT | Q4KM97 | Tyrosine-protein kinase BLK                                                       | Blk      | H (1)             | 1  |
| Met II        | Q4QQS6_RAT | Q4QQS6 | Dolichyl-phosphate beta-glucosyltransferase                                       | Alg5     | H (0)             | 5  |
| Met II        | Q4QQV0_RAT | Q4QQV0 | Tubulin beta-6                                                                    | Tubb6    | H (1) M (1)       | 19 |
| Met I; Met II | Q4V7D1_RAT | Q4V7D1 | Translocon-associated protein subunit alpha                                       | Ssr1     | H (1) M (1) R (1) | 35 |
| Met I; Met II | Q4V7D9_RAT | Q4V7D9 | Acid sphingomyelinase-like phosphodiesterase 3B                                   | Smpdl3b  | H (0) M (0)       | 22 |
| Met II        | Q4V8N6_RAT | Q4V8N6 | Solute carrier organic anion transporter family member 2A1                        | Slco4a1  | H (0) M (0)       | 5  |
| Met II        | Q52KJ9_RAT | Q52KJ9 | Thioredoxin-related transmembrane protein 1                                       | Tmx1     | H (1) M (1)       | 31 |
| Met II        | Q5BJZ3_RAT | Q5BJZ3 | Nicotinamide nucleotide transhydrogenase                                          | Nnt      | H (1) M (1)       | 28 |
| Met II        | Q5EAP4_RAT | Q5EAP4 | Guanine nucleotide binding protein alpha-14                                       | Gna14    | H (1) M (1)       | 19 |
| Met I; Met II | Q5M7T6_RAT | Q5M7T6 | V-type proton ATPase subunit D 1                                                  | Atp6v0d1 | H (3) M (3)       | 71 |
| Met I         | Q5M860_RAT | Q5M860 | Rho GDP dissociation inhibitor 2                                                  | Arhgdib  | H (1) M (1)       | 10 |
| Met I         | Q5RJK5_RAT | Q5RJK5 | Chromobox 3                                                                       | Cbx3     | H (0)             | 3  |
| Met II        | Q5RKJ9_RAT | Q5RKJ9 | Ras-related protein Rab-10                                                        | Rab10    | H (1) M (1) R (1) | 60 |
| Met I; Met II | Q5U1Y2_RAT | Q5U1Y2 | Ras-related C3 botulinum toxin substrate 2 (Rac2)                                 | Rac2     | H (1) M (0)       | 32 |
| Met II        | Q5U1Z9_RAT | Q5U1Z9 | Metaxin 2                                                                         | Mtx2     | H (1) M (1)       | 15 |
| Met II        | Q5U2Z8_RAT | Q5U2Z8 | Elongation of very long chain fatty acids protein 1                               | Elov11   | H (0) M (0)       | 10 |
| Met I         | Q5U362_RAT | Q5U362 | Annexin A4                                                                        | Anxa4    | H (1) M (1) R (1) | 31 |
| Met I; Met II | Q5U3Z7_RAT | Q5U3Z7 | Serine hydroxymethyltransferase                                                   | Shmt2    | M (0)             | 1  |
| Met II        | Q5VLR5_RAT | Q5VLR5 | Endoplasmic reticulum resident protein 44                                         | Erp44    | H (1)             | 8  |
| Met II        | Q5XI04_RAT | Q5XI04 | Erythrocyte band 7 integral membrane protein                                      | Stom     | H (1) M (1)       | 77 |
| Met I; Met II | Q5XI34_RAT | Q5XI34 | Serine/threonine-protein phosphatase 2A 65 kDa regulatory subunit A alpha isoform | Ppp2r1a  | H (1) M (1)       | 17 |
| Met II        | Q5XI36_RAT | Q5XI36 | CD97                                                                              | Adgre5   | H (1) M (1)       | 5  |
| Met I         | Q5XI38_RAT | Q5XI38 | Lymphocyte cytosolic protein 1                                                    | Lcp1     | H (0) M (0)       | 20 |
| Met I         | Q5XI77_RAT | Q5XI77 | Annexin A11                                                                       | Anxa11   | H (1) M (1)       | 24 |

|               |            |        |                                                      |              |                   |    |
|---------------|------------|--------|------------------------------------------------------|--------------|-------------------|----|
| Met II        | Q5XI86_RAT | Q5XI86 | Peptidyl-tRNA hydrolase 2                            | Pthr2        | H (1) M (1)       | 11 |
| Met II        | Q5XIH3_RAT | Q5XIH3 | NADH dehydrogenase [ubiquinone] flavoprotein 1       | Ndufv1       | H (1) M (1) R (1) | 38 |
| Met I         | Q5XIM7_RAT | Q5XIM7 | Lysine--tRNA ligase                                  | Kars         | H (1) M (0)       | 10 |
| Met II        | Q5XIP2_RAT | Q5XIP2 | GPI-anchor transamidase                              | Pigk         | H (1) M (1)       | 8  |
| Met II        | Q5XIU4_RAT | Q5XIU4 | B-cell receptor-associated protein 29                | Bcap29       | H (0)             | 12 |
| Met I         | Q5XIV1_RAT | Q5XIV1 | Phosphoglycerate kinase 2                            | Pgk2         | H (0)             | 1  |
| Met II        | Q66H18_RAT | Q66H18 | Synaptophysin-like 1                                 | Syp1l        | H (1) M (1)       | 24 |
| Met I         | Q68FX4_RAT | Q68FX4 | Hematopoietic cell-specific LYN substrate 1 (hcls1)  | Hcls1        | H (0)             | 6  |
| Met II        | Q6AXX5_RAT | Q6AXX5 | Retinol dehydrogenase 11                             | Rdh11        | H (1) M (1)       | 20 |
| Met II        | Q6AY18_RAT | Q6AY18 | GTP-binding protein SAR1a                            | Sar1a        | H (0) M (0)       | 13 |
| Met I; Met II | Q6AYD3_RAT | Q6AYD3 | Proliferation-associated protein 2G4                 | Pa2g4        | H (1) M (1)       | 16 |
| Met I; Met II | Q6AYI1_RAT | Q6AYI1 | Probable ATP-dependent RNA helicase DDX5             | Ddx5         | H (0) M (0)       | 3  |
| Met II        | Q6AYM8_RAT | Q6AYM8 | Glycosylphosphatidylinositol anchor attachment 1     | Gpaa1        | H (0) M (0)       | 3  |
| Met II        | Q6AYQ9_RAT | Q6AYQ9 | Peptidyl-prolyl cis-trans isomerase C                | Ppic         | M (0)             | 12 |
| Met I; Met II | Q6IFU9_RAT | Q6IFU9 | keratin 16                                           | Krt16        | H (1)             | 12 |
| Met II        | Q6IFV6_RAT | Q6IFV6 | Keratin 35                                           | Krt35        | M (0)             | 1  |
| Met II        | Q6IFZ5_RAT | Q6IFZ5 | Keratin, type II cytoskeletal 2 oral                 | Krt76        | H (1) M (0)       | 16 |
| Met II        | Q6IN24_RAT | Q6IN24 | Galectin-8                                           | Lgals8       | H (1) M (2) R (1) | 43 |
| Met I         | Q6IN37_RAT | Q6IN37 | GM2 ganglioside activator                            | Gm2a         | H (0)             | 1  |
| Met II        | Q6IRF8_RAT | Q6IRF8 | V-type proton ATPase subunit S1                      | Atp6ap1      | H (1) M (1) R (1) | 39 |
| Met I; Met II | Q6MGA3_RAT | Q6MGA3 | Antigen peptide transporter 2                        | Tap2         | H (0) M (0) R (0) | 6  |
| Met II        | Q6MGB4_RAT | Q6MGB4 | H2-K region expressed gene 4, rat orthologue         | Slc39a7      | R (0)             | 1  |
| Met I; Met II | Q6P3V8_RAT | Q6P3V8 | Eukaryotic initiation factor 4A-I                    | Eif4a1       | H (1) M (1)       | 39 |
| Met II        | Q6P3V9_RAT | Q6P3V9 | 60S ribosomal protein L4                             | Rpl4         | H (3) M (3) R (3) | 50 |
| Met II        | Q6P503_RAT | Q6P503 | V-type proton ATPase subunit D                       | Atp6v1d      | M (1)             | 23 |
| Met I; Met II | Q6P685_RAT | Q6P685 | Eukaryotic translation initiation factor 2 subunit 2 | Eif2s2       | H (0) M (0)       | 15 |
| Met I         | Q6P6T6_RAT | Q6P6T6 | Cathepsin D                                          | Ctsd         | H (1) M (1) R (1) | 32 |
| Met II        | Q6P9V1_RAT | Q6P9V1 | CD81 molecule                                        | Cd81         | H (1) M (1) R (1) | 22 |
| Met II        | Q6PCU4_RAT | Q6PCU4 | Emerin                                               | Emd          | H (1) M (1)       | 30 |
| Met II        | Q6PDV6_RAT | Q6PDV6 | 40S ribosomal protein S14                            | LOC100911847 | H (1) M (1) R (1) | 23 |
| Met I         | Q6TXF3_RAT | Q6TXF3 | Acyl-CoA-binding protein                             | Dbi          | H (0) M (1) R (1) | 7  |
| Met I; Met II | Q76GL9_RAT | Q76GL9 | Neutral amino acid transporter A                     | Slc1a4       | H (1) M (1)       | 6  |
| Met I; Met II | Q78P65_RAT | Q78P65 | Rap2A-like protein                                   | Rap2a        | R (1)             | 1  |
| Met II        | Q7TP42_RAT | Q7TP42 | Translocation protein SEC62                          | Sec62        | H (1) M (1)       | 21 |
| Met II        | Q8SEZ5_RAT | Q8SEZ5 | Cytochrome c oxidase subunit 2                       | Mt-co2       | H (3) M (3) R (3) | 57 |
| Met II        | Q99JC6_RAT | Q99JC6 | Tapasin                                              | Tapbp        | H (0) M (0)       | 10 |
| Met I         | Q9JKB7_RAT | Q9JKB7 | Guanine deaminase                                    | Gda          | H (0) R (0)       | 3  |
| Met I         | Q9QX80_RAT | Q9QX80 | Heterogeneous nuclear ribonucleoprotein A/B          | Hnrnpab      | H (0) M (0)       | 13 |
| Met II        | Q9Z1J7_RAT | Q9Z1J7 | Amino acid transporter                               | Slc1a5       | M (1)             | 14 |
| Met I; Met II | QCR1_RAT   | Q68FY0 | Cytochrome b-c1 complex subunit 1 mitochondrial      | Uqcrc1       | H (3) M (3)       | 59 |
| Met I; Met II | QCR2_RAT   | P32551 | Cytochrome b-c1 complex subunit 2 mitochondrial      | Uqcrc2       | H (3) M (3) R (3) | 72 |
| Met I; Met II | QCR6_RAT   | Q5M9I5 | Cytochrome b-c1 complex subunit 6 mitochondrial      | Uqcrrh       | H (1) R (1)       | 12 |
| Met II        | R9PXR4_RAT | R9PXR4 | Mitochondrial import receptor subunit TOM70          | Tomm70       | H (1) M (1) R (1) | 33 |
| Met I         | R9PXR7_RAT | B2GV92 | Prostaglandin E synthase 3                           | Ptges3       | H (0) M (0)       | 4  |

|               |           |        |                                                   |         |                   |    |
|---------------|-----------|--------|---------------------------------------------------|---------|-------------------|----|
| Met II        | RAB14_RAT | P61107 | Ras-related protein Rab-14                        | Rab14   | H (1) M (1) R (1) | 59 |
| Met I; Met II | RAB15_RAT | P35289 | Ras-related protein Rab-15                        | Rab15   | H (0) M (0)       | 4  |
| Met II        | RAB18_RAT | Q5EB77 | Ras-related protein Rab-18                        | Rab18   | H (1) M (1) R (1) | 29 |
| Met I; Met II | RAB1A_RAT | Q6NYB7 | Ras-related protein Rab-1a                        | Rab1A   | H (3) M (3) R (3) | 55 |
| Met II        | RAB21_RAT | Q6AXT5 | Ras-related protein Rab-21                        | Rab21   | H (1) M (1) R (1) | 30 |
| Met I; Met II | RAB2A_RAT | P05712 | Ras-related protein Rab-2a                        | Rab2a   | H (1) M (1) R (1) | 58 |
| Met I; Met II | RAB35_RAT | Q5U316 | Ras-related protein Rab-35                        | Rab35   | H (1) M (1) R (1) | 54 |
| Met II        | RAB3A_RAT | P63012 | Ras-related protein Rab-3a                        | Rab3a   | H (1) M (1) R (1) | 10 |
| Met II        | RAB3D_RAT | Q63942 | Ras-related protein Rab-3d                        | Rab3d   | H (0)             | 3  |
| Met I; Met II | RAB4B_RAT | P51146 | Ras-related protein Rab-4b                        | Rab4b   | H (1) R (1)       | 7  |
| Met II        | RAB6A_RAT | Q9WVB1 | Ras-related protein Rab-6a                        | Rab6a   | H (1) M (1) R (1) | 40 |
| Met I; Met II | RAB7A_RAT | P09527 | Ras-related protein Rab-7a                        | Rab7a   | H (1) M (1) R (1) | 79 |
| Met II        | RAB8A_RAT | P35280 | Ras-related protein Rab-8a                        | Rab8a   | H (1) M (1) R (1) | 30 |
| Met I; Met II | RAB8B_RAT | P70550 | Ras-related protein Rab-8b                        | Rab8b   | H (1) M (1) R (1) | 27 |
| Met II        | RAB9A_RAT | Q99P75 | Ras-related protein Rab-9a                        | Rab9a   | H (0) M (0)       | 16 |
| Met I; Met II | RAC1_RAT  | Q6RUV5 | Ras-related C3 botulinum toxin substrate 1 (Rac1) | Rac1    | H (3) M (3) R (3) | 65 |
| Met I         | RACK1_RAT | P63245 | Receptor of activated protein C kinase 1 (RACK1)  | Rack1   | H (0) M (0)       | 19 |
| Met II        | RALA_RAT  | P63322 | Ras-related protein Ral-A                         | Rala    | H (1) M (1) R (1) | 50 |
| Met I         | RAN_RAT   | P62828 | GTP-binding nuclear protein Ran                   | Ran     | H (1) M (1)       | 29 |
| Met I; Met II | RAP1A_RAT | P62836 | Ras-related protein Rap-1a                        | Rap1a   | H (1) M (1) R (1) | 61 |
| Met I; Met II | RAP1B_RAT | Q62636 | Ras-related protein Rap-1b                        | Rap1b   | H (3) M (3) R (3) | 55 |
| Met I; Met II | RAP2B_RAT | P61227 | Ras-related protein Rap-2b                        | Rap2b   | H (1) M (1) R (1) | 47 |
| Met II        | RASH_RAT  | P20171 | GTPase HRas                                       | Hras    | H (1) M (1) R (1) | 29 |
| Met II        | RASK_RAT  | P08644 | GTPase KRas                                       | Kras    | H (0) M (0) R (0) | 24 |
| Met II        | RASN_RAT  | Q04970 | GTPase NRas                                       | Nras    | H (1) M (1) R (1) | 24 |
| Met I; Met II | RB11B_RAT | O35509 | Ras-related protein Rab-11b                       | Rab11b  | H (3) M (3) R (3) | 49 |
| Met II        | RB27A_RAT | P23640 | Ras-related protein Rab-27a                       | Rab27a  | H (0) M (0)       | 3  |
| Met II        | RB27B_RAT | Q99P74 | Ras-related protein Rab-27b                       | Rab27b  | H (0)             | 10 |
| Met II        | REN1_RAT  | Q6AXS4 | Renin receptor                                    | Atp6ap2 | H (1) M (1) R (1) | 33 |
| Met II        | RER1_RAT  | Q498C8 | Protein RER1                                      | Rer1    | H (0) M (0)       | 10 |
| Met I; Met II | RGS19_RAT | O70521 | Regulator of G-protein signaling 19               | Rgs19   | H (1) M (0) R (1) | 37 |
| Met II        | RHBL4_RAT | Q4V8F3 | Rhomboid-related protein 4                        | Rhbdd1  | H (0) M (0)       | 3  |
| Met I; Met II | RHOA_RAT  | P61589 | Transforming protein RhoA                         | Rhoa    | H (1) M (1) R (1) | 37 |
| Met II        | RHOB_RAT  | P62747 | Rho-related GTP-binding protein RhoB              | Rhob    | M (0) R (0)       | 3  |
| Met II        | RL10_RAT  | Q6PDV7 | 60S ribosomal protein L10                         | Rpl10   | H (1) M (1)       | 26 |
| Met I; Met II | RL10A_RAT | P62907 | 60S ribosomal protein L10a                        | Rpl10a  | H (1) M (1)       | 28 |
| Met II        | RL11_RAT  | P62914 | 60S ribosomal protein L11                         | Rpl11   | H (3) M (3) R (3) | 20 |
| Met II        | RL12_RAT  | P23358 | 60S ribosomal protein L12                         | Rpl12   | H (1) M (1) R (1) | 43 |
| Met II        | RL13A_RAT | P35427 | 60S ribosomal protein L13a                        | Rpl13a  | H (0) M (0) R (0) | 29 |
| Met II        | RL14_RAT  | Q63507 | 60S ribosomal protein L14                         | Rpl14   | H (1) M (1) R (1) | 38 |
| Met II        | RL17_RAT  | P24049 | 60S ribosomal protein L17                         | Rpl17   | H (1) M (1)       | 30 |
| Met II        | RL18_RAT  | P12001 | 60S ribosomal protein L18                         | Rpl18   | H (1) M (1) R (1) | 53 |
| Met II        | RL18A_RAT | P62718 | 60S ribosomal protein L18a                        | Rpl18a  | H (1) M (1)       | 23 |
| Met II        | RL19_RAT  | P84100 | 60S ribosomal protein L19                         | Rpl19   | H (1) M (1)       | 33 |



|               |           |        |                                                                         |         |                   |    |
|---------------|-----------|--------|-------------------------------------------------------------------------|---------|-------------------|----|
| Met II        | RL23_RAT  | P62832 | 60S ribosomal protein L23                                               | Rpl23   | H (1) M (1) R (1) | 39 |
| Met II        | RL24_RAT  | P83732 | 60S ribosomal protein L24                                               | Rpl24   | H (1) M (1)       | 28 |
| Met II        | RL3_RAT   | P21531 | 60S ribosomal protein L3                                                | Rpl3    | H (1)             | 21 |
| Met I; Met II | RL30_RAT  | P62890 | 60S ribosomal protein L30                                               | Rpl30   | H (1) M (1)       | 16 |
| Met I; Met II | RL40_RAT  | P62986 | Ubiquitin-60S ribosomal protein L40                                     | Uba52   | H (0)             | 15 |
| Met I         | RL5_RAT   | P09895 | 60S ribosomal protein L5                                                | Rpl5    | H (1) M (0)       | 24 |
| Met I; Met II | RL7_RAT   | P05426 | 60S ribosomal protein L7                                                | Rpl7    | H (0) M (0) R (0) | 48 |
| Met II        | RLA0_RAT  | P19945 | 60S acidic ribosomal protein P0                                         | Rplp0   | H (1) M (1) R (1) | 54 |
| Met I; Met II | RLA1_RAT  | P19944 | 60S acidic ribosomal protein P1                                         | Rplp1   | H (1) M (1) R (1) | 22 |
| Met I         | RLA2_RAT  | P02401 | 60S acidic ribosomal protein P2                                         | Rplp2   | H (1) M (1) R (1) | 41 |
| Met II        | RMD3_RAT  | Q66H15 | Regulator of microtubule dynamics protein 3                             | Rmdn3   | H (1) M (1) R (1) | 13 |
| Met I         | ROA3_RAT  | Q6URK4 | Heterogeneous nuclear ribonucleoprotein A3                              | Hnrnpa3 | H (1) M (1)       | 10 |
| Met I         | RPN1_RAT  | P07153 | Dolichyl-diphosphooligosaccharide protein glycosyltransferase subunit 1 | Rpn1    | H (1) M (1) R (1) | 70 |
| Met I; Met II | RPN2_RAT  | P25235 | Dolichyl-diphosphooligosaccharide protein glycosyltransferase subunit 2 | Rpn2    | H (1) M (1) R (1) | 54 |
| Met II        | RRAGA_RAT | Q63486 | Ras-related GTP-binding protein A (Rag A)                               | Rraga   | H (0) M (0)       | 4  |
| Met II        | RS11_RAT  | P62282 | 40S ribosomal protein S11                                               | Rps11   | H (0) M (0)       | 24 |
| Met II        | RS13_RAT  | P62278 | 40S ribosomal protein S13                                               | Rps13   | H (1) M (1) R (1) | 29 |
| Met II        | RS15A_RAT | P62246 | 40S ribosomal protein S15a                                              | Rps15a  | H (1) M (1)       | 27 |
| Met II        | RS16_RAT  | P62250 | 40S ribosomal protein S16                                               | Rps16   | H (1) M (1) R (1) | 48 |
| Met I         | RS19_RAT  | P17074 | 40S ribosomal protein S19                                               | Rps19   | H (1) M (0) R (0) | 28 |
| Met II        | RS27A_RAT | P62982 | Ubiquitin-40S ribosomal protein S27a                                    | Rps27a  | H (1)             | 16 |
| Met I; Met II | RS28_RAT  | P62859 | 40S ribosomal protein S28                                               | Rps28   | M (0)             | 5  |
| Met I; Met II | RS3_RAT   | P62909 | 40S ribosomal protein S3                                                | Rps3    | H (1) M (1) R (1) | 46 |
| Met II        | RS3A_RAT  | P49242 | 40S ribosomal protein S3a                                               | Rps3a   | H (1) M (1)       | 30 |
| Met II        | RS4X_RAT  | P62703 | 40S ribosomal protein S4, X isoform                                     | Rps4x   | H (1) M (1)       | 39 |
| Met I; Met II | RS7_RAT   | P62083 | 40S ribosomal protein S7                                                | Rps7    | H (1) M (1) R (1) | 39 |
| Met I; Met II | RS8_RAT   | P62243 | 40S ribosomal protein S8                                                | Rps8    | H (1) M (1) R (1) | 41 |
| Met I; Met II | RSSA_RAT  | P38983 | 40S ribosomal protein SA                                                | Rpsa    | H (3) M (3)       | 31 |
| Met I; Met II | RTN4_RAT  | Q9JK11 | Reticulon-4                                                             | Rtn4    | H (3) M (3) R (3) | 53 |
| Met I; Met II | S38A2_RAT | Q9JHE5 | Sodium-coupled neutral amino acid transporter 2                         | Slc38a2 | H (0) M (0)       | 21 |
| Met II        | S61A1_RAT | P61621 | SEC61 alpha-1                                                           | Sec61a1 | H (0) M (0) R (0) | 26 |
| Met II        | SAC1_RAT  | Q9ES21 | Phosphatidylinositol phosphatase SAC1                                   | Sacm1l  | H (1) M (1) R (1) | 9  |
| Met I         | SAE1_RAT  | Q6AXQ0 | SUMO-activating enzyme subunit 1                                        | Sae1    | H (0)             | 1  |
| Met II        | SAM50_RAT | Q6AXV4 | Sorting and assembly machinery component 50 homolog                     | Samm50  | H (1) M (1) R (1) | 34 |
| Met I; Met II | SAP_RAT   | P10960 | Prosaposin                                                              | Psap    | H (1) M (1) R (1) | 18 |
| Met II        | SARAF_RAT | Q6AYN2 | Store-operated calcium entry-associated regulatory factor (SARAF)       | Saraf   | H (0)             | 1  |
| Met II        | SC11A_RAT | P42667 | SEC11 homolog A                                                         | Sec11a  | H (1) M (1) R (1) | 26 |
| Met II        | SC11C_RAT | Q9WTR7 | SEC11 homolog C                                                         | Sec11c  | H (0) M (0) R (0) | 5  |
| Met I; Met II | SC22B_RAT | Q4KM74 | Vesicle-trafficking protein SEC22b                                      | Sec22b  | H (1) M (1) R (1) | 48 |
| Met II        | SCFD1_RAT | Q62991 | Syntaxin-binding protein 1-like 2                                       | Scfd1   | H (0) M (0) R (0) | 10 |
| Met II        | SCR2_RAT  | P27615 | Lysosome membrane protein 2 (CD36)                                      | Scarb2  | H (1) M (1) R (1) | 34 |
| Met II        | SELT_RAT  | Q1H5H1 | Thioredoxin reductase-like selenoprotein T                              | Selenot | H (0) R (0)       | 3  |
| Met I         | SEPT2_RAT | Q91Y81 | Septin-2                                                                | Sept2   | H (3) M (3) R (3) | 28 |
| Met I         | SERA_RAT  | O08651 | D-3-phosphoglycerate dehydrogenase                                      | Phgdh   | H (0) M (1) R (1) | 38 |

|               |           |        |                                                     |          |                   |    |
|---------------|-----------|--------|-----------------------------------------------------|----------|-------------------|----|
| Met I         | SET_RAT   | Q63945 | Protein SET                                         | Set      | H (0) M (0)       | 14 |
| Met I; Met II | SFXN1_RAT | Q63965 | Sideroflexin-1                                      | Sfxn1    | H (3) M (3) R (3) | 27 |
| Met II        | SGPL1_RAT | Q8CHN6 | Sphingosine-1-phosphate lyase 1                     | Sgpl1    | H (1) M (1)       | 10 |
| Met I; Met II | SNAA_RAT  | P54921 | Alpha-soluble NSF attachment protein (SNAP-alpha)   | Napa     | H (0) M (0)       | 20 |
| Met I; Met II | SND1_RAT  | Q66X93 | Staphylococcal nuclease domain-containing protein 1 | Snd1     | H (1) M (1)       | 23 |
| Met II        | SNG1_RAT  | Q62876 | Synaptogyrin-1                                      | Syngr1   | M (1) R (1)       | 6  |
| Met II        | SNG2_RAT  | O54980 | Synaptogyrin-2                                      | Syngr2   | M (0)             | 2  |
| Met II        | SNP23_RAT | O70377 | Synaptosomal-associated protein 23 (SNAP-23)        | Snap23   | H (3) M (3) R (3) | 74 |
| Met I         | SODC_RAT  | P07632 | Superoxide dismutase [Cu-Zn]                        | Sod1     | H (0) M (0) R (0) | 12 |
| Met II        | SPNS1_RAT | Q2YDU8 | Protein spinster homolog 1                          | Spns1    | H (0) R (0)       | 8  |
| Met II        | SQSTM_RAT | O08623 | Sequestosome-1                                      | Sqstm1   | H (3) M (3)       | 25 |
| Met II        | SRPRB_RAT | Q4FZX7 | Signal recognition particle receptor beta           | Srprb    | H (1) M (1)       | 32 |
| Met I         | SRSF2_RAT | Q6PDU1 | Serine/arginine-rich splicing factor 2              | Srsf2    | H (0) M (0)       | 11 |
| Met II        | SSRD_RAT  | Q07984 | Translocon-associated protein subunit delta         | Ssr4     | H (1) M (1) R (1) | 32 |
| Met II        | STIM1_RAT | P84903 | Stromal interaction molecule 1 (STIM1)              | Stim1    | H (0) R (0)       | 8  |
| Met II        | STML2_RAT | Q4FZT0 | Stomatin-like protein 2                             | Stoml2   | H (3) M (3) R (3) | 63 |
| Met I; Met II | STX12_RAT | G3V7P1 | Syntaxin-12                                         | Stx12    | H (1) M (1)       | 38 |
| Met II        | STX3_RAT  | Q08849 | Syntaxin-3                                          | Stx3     | H (1) M (1)       | 7  |
| Met II        | STX5_RAT  | Q08851 | Syntaxin-5                                          | Stx5     | H (1) M (1)       | 5  |
| Met II        | STX6_RAT  | Q63635 | Syntaxin-6                                          | Stx6     | H (1) M (1) R (1) | 18 |
| Met II        | STX7_RAT  | O70257 | Syntaxin-7                                          | Stx7     | H (1) M (1) R (1) | 49 |
| Met II        | STX8_RAT  | Q9Z2Q7 | Syntaxin-8                                          | Stx8     | H (1) M (1) R (1) | 22 |
| Met II        | STXB2_RAT | Q62753 | Syntaxin-binding protein 2                          | Stxbp2   | H (0) M (0)       | 24 |
| Met II        | STXB5_RAT | Q9WU70 | Syntaxin-binding protein 5                          | Stxbp5   | H (0) M (0)       | 5  |
| Met I         | SYAC_RAT  | P50475 | Alanine--tRNA ligase cytoplasmic                    | Aars     | H (0) M (0)       | 18 |
| Met I         | SYG_RAT   | Q5I0G4 | Glycine--tRNA ligase                                | Gars     | H (0) M (0)       | 14 |
| Met I         | SYSC_RAT  | Q6P799 | Serine--tRNA ligase cytoplasmic                     | Sars     | H (0)             | 1  |
| Met II        | SYVC_RAT  | Q04462 | Valine--tRNA ligase                                 | Vars     | H (0) M (0)       | 8  |
| Met I         | SYYC_RAT  | Q4KM49 | Tyrosine--tRNA ligase cytoplasmic                   | Yars     | H (0) M (0)       | 7  |
| Met II        | T106B_RAT | Q6AYA5 | Transmembrane protein 106 B                         | Tmem106b | H (1) M (1) R (1) | 33 |
| Met II        | T120A_RAT | Q5HZE2 | Transmembrane protein 120 A                         | Tmem120a | H (1) M (1) R (1) | 28 |
| Met I         | TAGL2_RAT | Q5XFX0 | Transgelin-2                                        | Tagln2   | H (3) M (3)       | 25 |
| Met II        | TAP1_RAT  | P36370 | Antigen peptide transporter 1                       | Tap1     | H (0) M (0)       | 10 |
| Met II        | TAXB1_RAT | Q66HA4 | Tax1-binding protein 1 homolog                      | Tax1bp1  | M (0)             | 6  |
| Met I         | TBA1A_RAT | P68370 | Tubulin alpha-1A                                    | Tuba1a   | H (1) M (1) R (1) | 50 |
| Met II        | TBA1B_RAT | Q6P9V9 | Tubulin alpha-1B                                    | Tuba1b   | H (3) M (3) R (3) | 60 |
| Met I; Met II | TBA1C_RAT | Q6AYZ1 | Tubulin alpha-1C                                    | Tuba1c   | H (1) M (1) R (1) | 64 |
| Met I; Met II | TBA4A_RAT | Q5XIF6 | Tubulin alpha-4A                                    | Tuba4a   | M (1) R (1)       | 18 |
| Met II        | TBA8_RAT  | Q6AY56 | Tubulin alpha-8                                     | Tuba8    | H (1)             | 18 |
| Met I         | TBB2A_RAT | P85108 | Tubulin beta-2A                                     | Tubb2a   | H (3) M (3) R (3) | 29 |
| Met I         | TBB2B_RAT | Q3KRE8 | Tubulin beta-2B                                     | Tubb2b   | H (3) M (3) R (3) | 21 |
| Met I         | TBB3_RAT  | Q4QRB4 | Tubulin beta-3                                      | Tubb3    | H(1) M (1) R (1)  | 37 |
| Met I; Met II | TBB4B_RAT | Q6P9T8 | Tubulin beta-4B                                     | Tubb4b   | H (1) M (1) R (3) | 69 |
| Met I; Met II | TBB5_RAT  | P69897 | Tubulin beta-5                                      | Tubb5    | M (3) R (3)       | 34 |

|               |           |        |                                                                          |          |                   |    |
|---------------|-----------|--------|--------------------------------------------------------------------------|----------|-------------------|----|
| Met I         | TCP4_RAT  | Q63396 | Activated RNA polymerase II transcriptional coactivator p15              | Sub1     | H (0) M (0)       | 12 |
| Met II        | TCPB_RAT  | Q5XIM9 | T-complex protein 1 beta                                                 | Cct2     | H (1) M (1) R (1) | 47 |
| Met II        | TCPE_RAT  | Q68FQ0 | T-complex protein 1 epsilon                                              | Cct5     | H (3) M (3) R (3) | 37 |
| Met II        | TECR_RAT  | Q64232 | Very-long-chain enoyl-CoA reductase                                      | Tecr     | H (1) M (1)       | 30 |
| Met I; Met II | TERA_RAT  | P46462 | Transitional endoplasmic reticulum ATPase                                | Vcp      | H (1) M (1) R (1) | 55 |
| Met II        | TGON3_RAT | P19814 | Trans-Golgi network integral membrane protein TGN38                      | Ttgn1    | R (0)             | 1  |
| Met I         | THIO_RAT  | P11232 | Thioredoxin                                                              | Txn      | H (1)             | 14 |
| Met I; Met II | THY1_RAT  | P01830 | Thy-1 membrane glycoprotein                                              | Thy1     | H (3) M (3) R (3) | 36 |
| Met I; Met II | TKT_RAT   | P50137 | Transketolase                                                            | Tkt      | H (1) M (1)       | 24 |
| Met II        | TM109_RAT | Q6AYQ4 | Transmembrane protein 109                                                | Tmem109  | H (0) M (0)       | 13 |
| Met I; Met II | TM165_RAT | Q4V899 | Transmembrane protein 165                                                | Tmem165  | H (0) M (0)       | 5  |
| Met II        | TM168_RAT | Q5PQM0 | Transmembrane protein 168                                                | Tmem168  | H (0) M (0)       | 2  |
| Met II        | TM38B_RAT | Q68FV1 | Trimeric intracellular cation channel type B (TRIC-B)                    | Tmem38b  | H (0) M (0)       | 4  |
| Met II        | TM55A_RAT | Q4V888 | Type 2 phosphatidylinositol 4,5-bisphosphate 4-phosphatase               | Pip4p2   | H (1) M (1) R (1) | 20 |
| Met II        | TM9S1_RAT | Q66HF2 | Transmembrane 9 superfamily member 1                                     | Tm9sf1   | H (0)             | 8  |
| Met II        | TM9S2_RAT | Q66HG5 | Transmembrane 9 superfamily member 2                                     | Tm9sf2   | H (1) M (1) R (1) | 19 |
| Met II        | TM9S4_RAT | Q4KLL4 | Transmembrane 9 superfamily member 4                                     | Tm9sf4   | H (1) M (1) R (1) | 37 |
| Met II        | TMCO1_RAT | Q5I0H4 | Calcium load-activated calcium channel (CLAC channel)                    | Tmco1    | H (1) M (1) R (1) | 17 |
| Met II        | TMED1_RAT | Q5BK85 | Transmembrane emp24 domain-containing protein 1                          | Tmed1    | H (1)             | 6  |
| Met II        | TMED2_RAT | Q63524 | Transmembrane emp24 domain-containing protein 2                          | Tmed2    | R (1)             | 5  |
| Met II        | TMED5_RAT | Q6AXN3 | Transmembrane emp24 domain-containing protein 5                          | Tmed5    | H (1) M (1)       | 7  |
| Met I; Met II | TMED7_RAT | D3ZTX0 | Transmembrane emp24 domain-containing protein 7                          | Tmed7    | H (1) M (1)       | 15 |
| Met I; Met II | TMED9_RAT | Q5I0E7 | Transmembrane emp24 domain-containing protein 9                          | Tmed9    | H (1)             | 14 |
| Met I; Met II | TMEDA_RAT | Q63584 | Transmembrane emp24 domain-containing protein 10                         | Tmed10   | H (1) M (1) R (1) | 55 |
| Met II        | TMM43_RAT | Q5XIP9 | Transmembrane protein 43 (Protein LUMA)                                  | Tmem43   | H (3) M (3) R (3) | 53 |
| Met II        | TMX2_RAT  | Q5XIK2 | Thioredoxin-related transmembrane protein 2                              | Tmx2     | H (1) R (1)       | 11 |
| Met II        | TOIP1_RAT | Q5PQX1 | Torsin-1A-interacting protein 1                                          | Tor1aip1 | H (1) M (1)       | 17 |
| Met II        | TOM22_RAT | Q75Q41 | Mitochondrial import receptor subunit TOM22 homolog                      | Tomm22   | H (1) M (1) R (1) | 29 |
| Met I         | TPIS_RAT  | P48500 | Triosephosphate isomerase                                                | Tpi1     | H (1) M (1) R (1) | 38 |
| Met I; Met II | TPM3_RAT  | Q63610 | Tropomyosin alpha-3                                                      | Tpm3     | H (1) M (1)       | 33 |
| Met I; Met II | TPM4_RAT  | P09495 | Tropomyosin alpha-4                                                      | Tpm4     | H (1) M (1)       | 33 |
| Met II        | TRAM1_RAT | Q5XI41 | Translocating chain-associated membrane protein 1                        | Tram1    | H (0)             | 2  |
| Met I; Met II | TRPV2_RAT | Q9WUD2 | Transient receptor potential cation channel subfamily V member 2 (TRPV2) | Trpv2    | H (0) M (0)       | 19 |
| Met I         | TSH3_RAT  | D3ZKB9 | Teashirt homolog 3                                                       | Tshz3    | H (0)             | 1  |
| Met I         | TXNL1_RAT | Q920J4 | Thioredoxin-like protein 1                                               | Txn1     | H (0) M (0)       | 6  |
| Met II        | TXTP_RAT  | P32089 | Citrate transport protein                                                | Slc25a1  | H (1) M (1) R (1) | 31 |
| Met I         | TYB4_RAT  | P62329 | Thymosin beta-4                                                          | Tmsb4x   | H (0) M (0) R (0) | 4  |
| Met I         | UBA1_RAT  | Q5U300 | Ubiquitin-like modifier-activating enzyme 1                              | Uba1     | H (1) M (1) R (1) | 28 |
| Met I         | UBE2N_RAT | Q9EQX9 | Ubiquitin-conjugating enzyme E2 N                                        | Ube2n    | H (1) M (1)       | 9  |
| Met II        | UBXN4_RAT | Q5HZY0 | Erasin                                                                   | Ubxn4    | H (1)             | 3  |
| Met II        | UCRI_RAT  | P20788 | Cytochrome b-c1 complex subunit Rieske                                   | Uqcrrf1  | H (1) M (1) R (1) | 48 |
| Met II        | UFL1_RAT  | B2GV24 | E3 UFM1-protein ligase 1                                                 | Ufl1     | H (0) M (0)       | 10 |
| Met I; Met II | VAMP3_RAT | P63025 | VAMP3                                                                    | Vamp3    | H (1) M (1) R (1) | 36 |
| Met II        | VAMP5_RAT | Q9Z2J5 | VAMP5                                                                    | Vamp5    | H (1) M (1) R (1) | 11 |

|               |            |        |                                                      |          |                   |    |
|---------------|------------|--------|------------------------------------------------------|----------|-------------------|----|
| Met II        | VAMP7_RAT  | Q9JHW5 | VAMP7                                                | Vamp7    | H (1) M (1)       | 17 |
| Met II        | VAPA_RAT   | Q9Z270 | VAMP-associated protein A                            | Vapa     | H (1) M (1) R (1) | 57 |
| Met II        | VAPB_RAT   | Q9Z269 | VAMP-associated protein B                            | Vapb     | M (1) R (1)       | 10 |
| Met I         | VAT1_RAT   | Q3MIE4 | Synaptic vesicle membrane protein VAT-1 homolog      | Vat1     | H (1) M (1)       | 26 |
| Met I; Met II | VATB2_RAT  | P62815 | V-type proton ATPase subunit B                       | Atp6v1b2 | H (3) M (3)       | 71 |
| Met II        | VATE1_RAT  | Q6PCU2 | V-type proton ATPase subunit E 1                     | Atp6v1e1 | M (3)             | 25 |
| Met II        | VATF_RAT   | P50408 | V-type proton ATPase subunit F                       | Atp6v1f  | H (0) M (0) R (0) | 35 |
| Met I; Met II | VDAC1_RAT  | Q9Z2L0 | Voltage-dependent anion-selective channel protein 1  | Vdac1    | H (3) M (3) R (3) | 97 |
| Met I; Met II | VDAC2_RAT  | P81155 | Voltage-dependent anion-selective channel protein 2  | Vdac2    | H (3) M (3) R (1) | 90 |
| Met II        | VDAC3_RAT  | Q9R1Z0 | Voltage-dependent anion-selective channel protein 3  | Vdac3    | H (1) M (1) R (1) | 63 |
| Met I         | VIME_RAT   | P31000 | Vimentin                                             | Vim      | H (3) M (3) R (3) | 81 |
| Met II        | VKOR1_RAT  | Q6TEK4 | Vitamin K epoxide reductase complex subunit 1        | Vkorc1   | H (0) M (0)       | 3  |
| Met II        | VMAT2_RAT  | Q01827 | Vesicular amine transporter 2                        | Slc18a2  | H (0)             | 1  |
| Met II        | VMP1_RAT   | Q91ZQ0 | Vacuole membrane protein 1                           | Vmp1     | M (0)             | 1  |
| Met I; Met II | VWA5A_RAT  | Q75WE7 | Von Willebrand factor A domain-containing protein 5A | Vwa5a    | M (0)             | 1  |
| Met I         | YBOX3_RAT  | Q62764 | Y-box-binding protein 3                              | Ybx3     | H (1) M (0)       | 19 |
| Met II        | YES_RAT    | F1LM93 | Tyrosine-protein kinase Yes                          | Yes1     | H (1) M (1)       | 48 |
| Met II        | YIF1B_RAT  | Q6PEC3 | Protein YIF1B                                        | Yif1b    | H (0) M (0) R (0) | 5  |
| Met II        | YIPF4_RAT  | Q5M7T4 | Protein YIPF4                                        | Yipf4    | H (1) M (1) R (1) | 8  |
| Met II        | YIPF5_RAT  | Q5XID0 | Protein YIPF5                                        | Yipf5    | H (0)             | 10 |
| Met I; Met II | YME1L1_RAT | Q925S8 | ATP-dependent zinc metalloprotease YME1L1            | Yme1l1   | H (1) M (0)       | 11 |
| Met II        | ZNT1_RAT   | Q62720 | Zinc transporter 1                                   | Slc30a1  | H (0) M (0) R (0) | 14 |
| Met II        | ZW10_RAT   | Q4V8C2 | Centromere/kinetochore protein zw10 homolog          | Zw10     | H (0) R (0)       | 4  |

| Header line description of worksheet "RafProtV2 Analysis" |                                                                                                                                                                                                                                                                                                                                                                                                                     |
|-----------------------------------------------------------|---------------------------------------------------------------------------------------------------------------------------------------------------------------------------------------------------------------------------------------------------------------------------------------------------------------------------------------------------------------------------------------------------------------------|
| <b>Method</b>                                             | Protein identification by which Method                                                                                                                                                                                                                                                                                                                                                                              |
| <b>Protein ID</b>                                         | Protein identification of UniProt                                                                                                                                                                                                                                                                                                                                                                                   |
| <b>Protein accession</b>                                  | Protein accession number of UniProt                                                                                                                                                                                                                                                                                                                                                                                 |
| <b>Protein description</b>                                | Protein functional description                                                                                                                                                                                                                                                                                                                                                                                      |
| <b>Gene name</b>                                          | Indicates the name of the gene that code for the protein sequence                                                                                                                                                                                                                                                                                                                                                   |
| <b>Experimental evidence</b>                              | 0 - indicates that the protein has only been reported using a single biochemical extraction method and has not been reported to be sensitive to at least two raft perturbation techniques; 1 - denotes identification by more than one biochemical extraction method; 2 - denote sensitivity to more than one raft perturbation technique; 3 - denote compliance with both criteria. H - Human; M - Mouse; R - Rat. |
| <b>Number of citation</b>                                 | In how many studies the raft protein has been already described                                                                                                                                                                                                                                                                                                                                                     |
