# Supplementary material for: Proteomic Analysis of Lipid Rafts from RBL-2H3 Mast Cells
Source: MDPI journal article supplement (doi:10.3390/ijms20163904), 2019-08-11
Supplement: s1 [file s1]

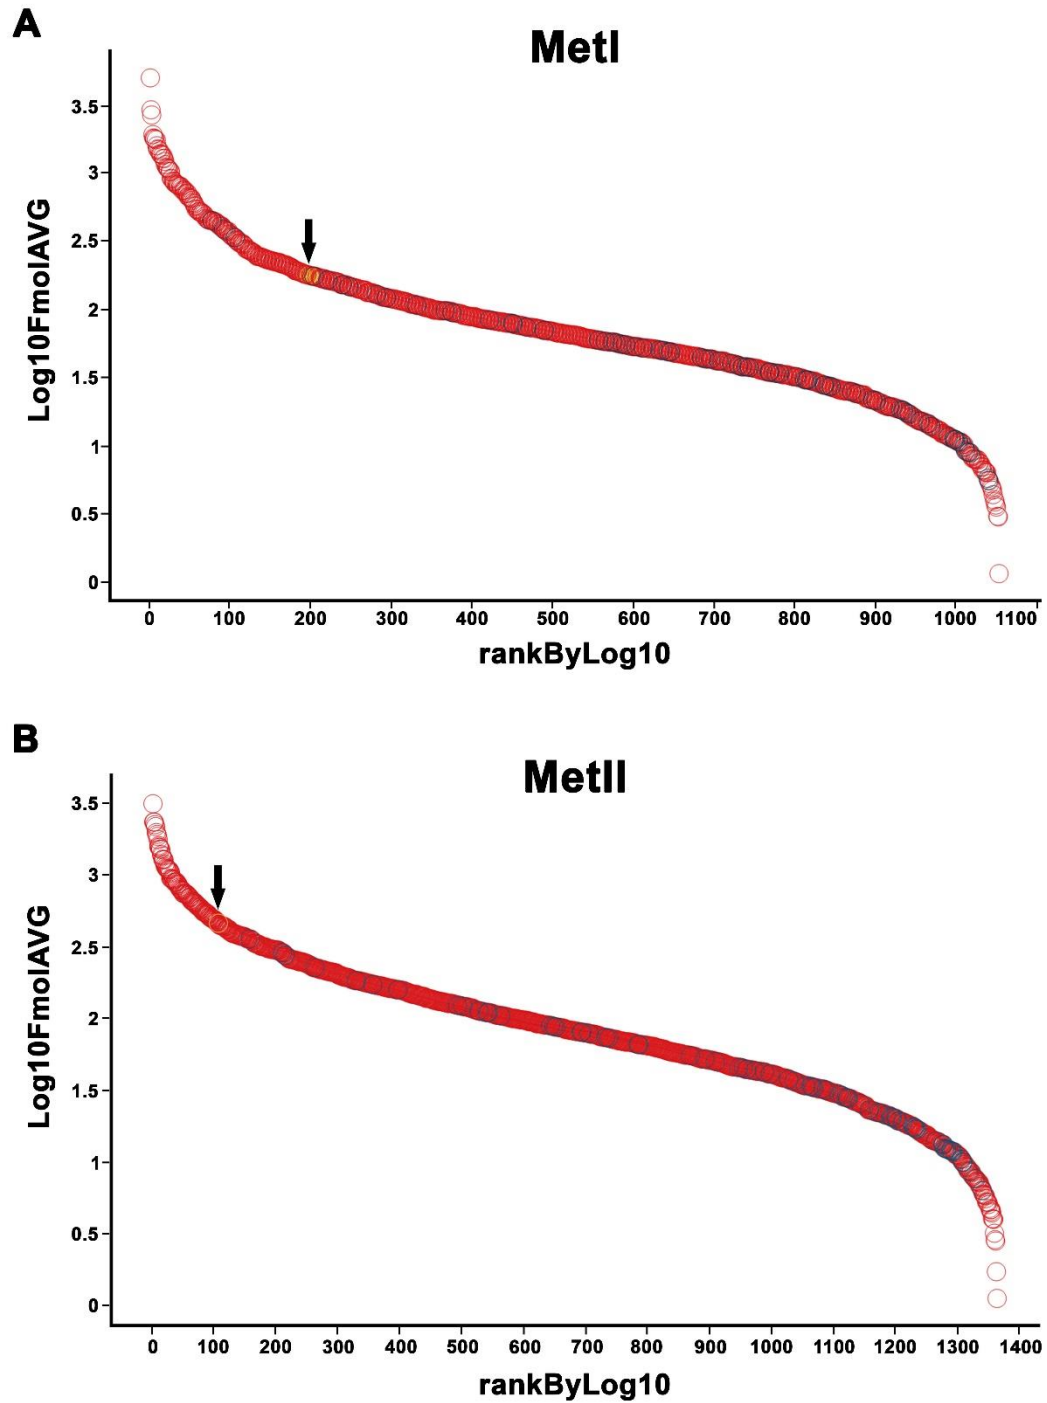

**Figure S1. Dynamic range of the proteomic analysis.** The graphs show the dynamic range from proteomic experiments for MetI (A) and MetII (B). Regular (red circles), reverse (blue circles) and internal standard (yellow circle; arrow) proteins are indicated. The regular and reverse proteins were identified using regular and reverse genomic databases from *Rattus norvegicus*. The yeast protein enolase was used as an internal standard.
