# Supplementary material for: Proteomic Analysis of Lipid Rafts from RBL-2H3 Mast Cells
Source: MDPI journal article supplement (doi:10.3390/ijms20163904), 2019-08-11
Supplement: s1 [file s1]

**Supplementary Table 1. Detailed annotation of proteins identified in Method I**

| Protein ID | Protein accession | Protein description                                           | Gene name | MW [kDa] | Score AVG | Peptides AVG |
|------------|-------------------|---------------------------------------------------------------|-----------|----------|-----------|--------------|
| 1433B_RAT  | P35213            | 14-3-3 protein beta/alpha                                     | Ywhab     | 28.05    | 11223.23  | 11           |
| 1433E_RAT  | P62260            | 14-3-3 protein epsilon                                        | Ywhae     | 29.17    | 26648.94  | 15           |
| 1433F_RAT  | P68511            | 14-3-3 protein eta                                            | Ywhah     | 28.21    | 9444.25   | 10           |
| 1433G_RAT  | P61983            | 14-3-3 protein gamma                                          | Ywhag     | 28.30    | 16888.38  | 10           |
| 1433T_RAT  | P68255            | 14-3-3 protein theta                                          | Ywhaq     | 27.78    | 6448.93   | 10           |
| 1433Z_RAT  | P63102            | 14-3-3 protein zeta/delta                                     | Ywhaz     | 27.77    | 51663.05  | 12           |
| 4F2_RAT    | Q794F9            | 4F2 cell-surface antigen heavy chain                          | Slc3a2    | 58.07    | 3739.78   | 8            |
| 6PGD_RAT   | P85968            | 6-phosphogluconate dehydrogenase decarboxylating              | Pgd       | 53.24    | 1909.47   | 9            |
| 6PGL_RAT   | P85971            | 6-phosphogluconolactonase                                     | Pgls      | 27.23    | 21556.29  | 8            |
| A0JN30_RAT | A0JN30            | Canopy 2 homolog                                              | Cnpy2     | 20.71    | 3486.07   | 6            |
| A3RLA8_RAT | A3RLA8            | Low affinity immunoglobulin gamma Fc region receptor II       | Fcgr2b    | 37.97    | 1010.58   | 5            |
| AATC_RAT   | P13221            | Aspartate aminotransferase cytoplasmic                        | Got1      | 46.43    | 1457.99   | 7            |
| AATM_RAT   | P00507            | Aspartate aminotransferase mitochondrial                      | Got2      | 47.31    | 3826.02   | 11           |
| ABCF1_RAT  | Q6MG08            | ATP-binding cassette sub-family F member 1                    | Abcf1     | 95.25    | 412.00    | 13           |
| ACON_RAT   | Q9ER34            | Aconitate hydratase mitochondrial                             | Aco2      | 85.43    | 1156.77   | 10           |
| ACTB_RAT   | P60711            | Actin cytoplasmic 1                                           | Actb      | 41.74    | 71387.43  | 25           |
| ACTH_RAT   | P63269            | Actin gamma-enteric smooth muscle                             | Actg2     | 41.88    | 36706.60  | 17           |
| ADA_RAT    | Q920P6            | Adenosine deaminase                                           | Ada       | 39.90    | 1325.03   | 8            |
| ADT1_RAT   | Q05962            | ADP/ATP translocase 1                                         | Slc25a4   | 32.99    | 5567.02   | 12           |
| ADT2_RAT   | Q09073            | ADP/ATP translocase 2                                         | Slc25a5   | 32.90    | 9236.08   | 10           |
| AK1A1_RAT  | P51635            | Alcohol dehydrogenase [NADP(+)]                               | Akr1a1    | 36.51    | 9758.76   | 11           |
| ALDOA_RAT  | P05065            | Fructose-bisphosphate aldolase A                              | Aldoa     | 39.35    | 6507.14   | 15           |
| ALDR_RAT   | P07943            | Aldose reductase                                              | Akr1b1    | 35.80    | 2510.29   | 12           |
| AN32B_RAT  | Q9EST6            | Acidic leucine-rich nuclear phosphoprotein 32 family member B | Anp32b    | 31.06    | 6097.84   | 4            |
| AN32E_RAT  | Q5XIE0            | Acidic leucine-rich nuclear phosphoprotein 32 family member E | Anp32e    | 29.42    | 1731.89   | 4            |
| ANXA1_RAT  | P07150            | Annexin A1                                                    | Anxa1     | 38.83    | 28648.83  | 22           |
| ANXA2_RAT  | Q07936            | Annexin A2                                                    | Anxa2     | 38.68    | 2992.42   | 10           |
| ANXA5_RAT  | P14668            | Annexin A5                                                    | Anxa5     | 35.75    | 1609.09   | 9            |
| ARL8B_RAT  | Q66HA6            | ADP-ribosylation factor-like protein 8B                       | Arl8b     | 21.54    | 1344.18   | 4            |
| ASNS_RAT   | P49088            | Glutamine-dependent asparagine synthetase                     | Asns      | 64.25    | 2279.61   | 9            |
| AT1A1_RAT  | P06685            | Sodium/potassium-transporting ATPase subunit alpha-1          | Atp1a1    | 113.05   | 3308.45   | 25           |
| AT1A2_RAT  | P06686            | Sodium/potassium-transporting ATPase subunit alpha-2          | Atp1a2    | 112.22   | 786.52    | 18           |
| AT1A3_RAT  | P06687            | Sodium/potassium-transporting ATPase subunit alpha-3          | Atp1a3    | 111.69   | 2489.10   | 14           |

|            |        |                                                                     |          |        |          |    |
|------------|--------|---------------------------------------------------------------------|----------|--------|----------|----|
| AT1A4_RAT  | Q64541 | Sodium/potassium-transporting ATPase subunit alpha-4                | Atp1a4   | 114.01 | 228.37   | 10 |
| AT1B3_RAT  | Q63377 | Sodium/potassium-transporting ATPase subunit beta-3                 | Atp1b3   | 31.83  | 1201.31  | 3  |
| ATP5H_RAT  | P31399 | ATP synthase subunit D mitochondrial                                | Atp5pd   | 18.76  | 4450.09  | 5  |
| ATP5I_RAT  | P29419 | ATP synthase subunit E mitochondrial                                | Atp5me   | 8.26   | 9619.80  | 1  |
| ATP5J_RAT  | P21571 | ATP synthase-coupling factor 6 mitochondrial                        | Atp5pf   | 12.49  | 11843.67 | 4  |
| ATPA_RAT   | P15999 | ATP synthase subunit alpha mitochondrial                            | Atp5f1a  | 59.75  | 23316.71 | 19 |
| ATPB_RAT   | P10719 | ATP synthase subunit beta mitochondrial                             | Atp5f1b  | 56.35  | 30347.52 | 20 |
| ATPO_RAT   | Q06647 | ATP synthase subunit O mitochondrial                                | Atp5po   | 23.40  | 11373.30 | 7  |
| B0BN81_RAT | B0BN81 | Ribosomal protein S5                                                | Rps5     | 22.91  | 918.98   | 5  |
| B0BNG3_RAT | B0BNG3 | Vesicular integral-membrane protein VIP36                           | Lman2    | 40.39  | 3280.38  | 12 |
| B0BNJ1_RAT | B0BNJ1 | Sorcin                                                              | Sri      | 21.62  | 7389.84  | 7  |
| B0K010_RAT | B0K010 | Thioredoxin domain-containing 17                                    | Txndc17  | 14.09  | 5852.90  | 4  |
| B0K031_RAT | B0K031 | 60S ribosomal protein L7, isoform                                   | Rpl7     | 30.31  | 1423.62  | 5  |
| B2GUV5_RAT | B2GUV5 | V-type proton ATPase subunit G 1                                    | Atp6v1g1 | 13.71  | 1621.28  | 2  |
| B2GUZ9_RAT | B2GUZ9 | Fam49b protein                                                      | Fam49b   | 36.78  | 3721.41  | 10 |
| B2GV72_RAT | B2GV72 | Carbonyl reductase 3                                                | Cbr3     | 30.84  | 2001.98  | 7  |
| B2GV96_RAT | B2GV96 | Coiled-coil domain containing 115                                   | Ccdc115  | 19.82  | 854.01   | 5  |
| B2GVB9_RAT | B2GVB9 | Fermt3 protein                                                      | Fermt3   | 75.62  | 1507.74  | 10 |
| B2MG_RAT   | P07151 | Beta-2-microglobulin                                                | B2m      | 13.72  | 2979.99  | 3  |
| B2RYC9_RAT | B2RYC9 | Glucosylceramidase                                                  | Gba      | 57.49  | 834.24   | 8  |
| B2RZ27_RAT | B2RZ27 | SH3 domain-binding glutamic acid-rich-like protein 3                | Sh3bgrl3 | 10.48  | 10096.01 | 3  |
| B2RZD1_RAT | B2RZD1 | Protein transport protein Sec61 subunit beta                        | Sec61b   | 9.99   | 4644.72  | 2  |
| B5DEN5_RAT | B5DEN5 | Eukaryotic translation elongation factor 1 beta 2                   | Eef1b2   | 24.68  | 2100.89  | 8  |
| BAG6_RAT   | Q6MG49 | Large proline-rich protein BAG6                                     | Bag6     | 120.01 | 616.14   | 10 |
| BASI_RAT   | P26453 | Basigin                                                             | Bsg      | 42.44  | 6552.17  | 6  |
| BASP1_RAT  | Q05175 | Brain acid soluble protein 1                                        | Basp1    | 21.79  | 8583.31  | 5  |
| C1QBP_RAT  | O35796 | Complement component 1 Q subcomponent-binding protein mitochondrial | C1qbp    | 31.00  | 8810.01  | 4  |
| CAH2_RAT   | P27139 | Carbonic anhydrase 2                                                | Ca2      | 29.11  | 14786.58 | 7  |
| CALM_RAT   | P0DP29 | Calmodulin-1                                                        | Calm1    | 16.84  | 16895.13 | 6  |
| CALR_RAT   | P18418 | Calreticulin                                                        | Calr     | 48.00  | 18376.84 | 15 |
| CALX_RAT   | P35565 | Calnexin                                                            | Canx     | 67.26  | 1491.23  | 11 |
| CAP1_RAT   | Q08163 | Adenylyl cyclase-associated protein 1                               | Cap1     | 51.59  | 3944.03  | 8  |
| CAPG_RAT   | Q6AYC4 | Macrophage-capping protein                                          | Capg     | 38.80  | 3876.14  | 7  |
| CAPZB_RAT  | Q5XI32 | F-actin-capping protein subunit beta                                | Capzb    | 30.63  | 2134.28  | 8  |
| CAZA2_RAT  | Q3T1K5 | F-actin-capping protein subunit alpha-2                             | Capza2   | 32.97  | 1161.94  | 5  |
| CD48_RAT   | P10252 | CD48 antigen                                                        | Cd48     | 27.68  | 943.18   | 7  |
| CDC37_RAT  | Q63692 | Hsp90 co-chaperone Cdc37                                            | Cdc37    | 44.51  | 5308.82  | 5  |
| CDC42_RAT  | Q8CFN2 | Cell division control protein 42 homolog (CDC42)                    | Cdc42    | 21.26  | 8806.95  | 5  |

|            |        |                                                           |              |        |          |    |
|------------|--------|-----------------------------------------------------------|--------------|--------|----------|----|
| CDV3_RAT   | Q5XIM5 | Protein CDV3 homolog                                      | Cdv3         | 24.31  | 1885.86  | 5  |
| CH10_RAT   | P26772 | 10 kDa heat shock protein mitochondrial                   | Hspe1        | 10.90  | 17415.36 | 8  |
| CISY_RAT   | Q8VHF5 | Citrate synthase mitochondrial                            | Cs           | 51.87  | 2329.63  | 9  |
| CLH1_RAT   | P11442 | Clathrin heavy chain 1                                    | Cltc         | 191.60 | 409.21   | 24 |
| CLIC1_RAT  | Q6MG61 | Chloride intracellular channel protein 1                  | Clic1        | 26.98  | 24293.77 | 11 |
| CNBP_RAT   | P62634 | Cellular nucleic acid-binding protein                     | Cnbp         | 19.46  | 3759.30  | 3  |
| CNTN1_RAT  | Q63198 | Contactin 1                                               | Cntn1        | 113.50 | 519.19   | 20 |
| COF1_RAT   | P45592 | Cofilin-1                                                 | Cfl1         | 18.53  | 35166.62 | 5  |
| COR1A_RAT  | Q91ZN1 | Coronin-1A                                                | Coro1a       | 51.07  | 4032.92  | 11 |
| COTL1_RAT  | B0BNA5 | Coactosin-like protein                                    | Cotl1        | 15.93  | 27708.91 | 9  |
| COX41_RAT  | P10888 | Cytochrome c oxidase subunit 4 isoform 1 mitochondrial    | Cox4i1       | 19.52  | 1971.84  | 8  |
| COX5A_RAT  | P11240 | Cytochrome c oxidase subunit 5A mitochondrial             | Cox5a        | 16.13  | 5776.28  | 5  |
| COX5B_RAT  | P12075 | Cytochrome c oxidase subunit 5B mitochondrial             | Cox5b        | 13.92  | 4351.65  | 6  |
| CP20A_RAT  | Q6P7D4 | Cytochrome P450 20A1                                      | Cyp20a1      | 52.00  | 2134.28  | 14 |
| CX6C2_RAT  | P11951 | Cytochrome c oxidase subunit 6C2                          | Cox6c2       | 8.46   | 4565.52  | 4  |
| CYBP_RAT   | Q6AYK6 | Calcyclin-binding protein                                 | Cacybp       | 26.54  | 1038.41  | 7  |
| CYC_RAT    | P62898 | Cytochrome c somatic                                      | Cycs         | 11.61  | 8475.21  | 6  |
| D3ZD09_RAT | D3ZD09 | Cytochrome c oxidase subunit 6B1                          | Cox6b1       | 10.07  | 3236.07  | 7  |
| D3ZGM7_RAT | D3ZGM7 | Peptidase inhibitor 16                                    | Pi16         | 52.15  | 747.31   | 3  |
| D3ZN21_RAT | D3ZN21 | ATP-dependent RNA helicase DDX3Y                          | Ddx3y        | 72.99  | 1314.29  | 13 |
| D3ZNQ6_RAT | D3ZNQ6 | NEDD8-conjugating enzyme Ubc12                            | Ube2m        | 20.90  | 4121.65  | 6  |
| D3ZPP2_RAT | D3ZPP2 | ADP-ribosylation factor-like protein 8A                   | Arl8a        | 21.39  | 1338.81  | 5  |
| D3ZPR0_RAT | D3ZPR0 | Exportin-2                                                | Cse1l        | 110.21 | 805.23   | 11 |
| D3ZRN3_RAT | D3ZRN3 | Beta-actin-like protein 2                                 | Actbl2       | 41.96  | 20353.75 | 13 |
| D3ZSA9_RAT | D3ZSA9 | Nodal modulator 1                                         | Nomo1        | 133.44 | 750.75   | 16 |
| D3ZV75_RAT | D3ZV75 | Major facilitator superfamily domain-containing protein 1 | Mfsd1        | 51.20  | 583.26   | 1  |
| D3ZYS7_RAT | D3ZYS7 | Ras GTPase-activating protein 1                           | G3bp1        | 51.79  | 876.93   | 6  |
| D3ZYW2_RAT | Q499R8 | Heterogeneous nuclear ribonucleoprotein H                 | Hnrnph1      | 20.58  | 3022.02  | 9  |
| D3ZZR9_RAT | D3ZZR9 | Peptidylprolyl isomerase                                  | Fkbp2        | 15.39  | 7827.55  | 4  |
| D4A0Y9_RAT | D4A0Y9 | Phosphatidylcholine translocator ABCB4                    | Abcb1b       | 141.05 | 356.53   | 8  |
| D4A133_RAT | D4A133 | V-type proton ATPase catalytic subunit A                  | Atp6v1a      | 68.27  | 963.97   | 17 |
| D4A1D8_RAT | D4A1D8 | Surfeit 4                                                 | Surf4        | 30.38  | 1071.58  | 3  |
| D4A3S8_RAT | D4A3S8 | NOL1/NOP2/Sun domain family member 2                      | Nsun2        | 88.09  | 666.64   | 10 |
| D4A6A2_RAT | D4A6A2 | Heterogeneous nuclear ribonucleoprotein A3-like           | LOC100911361 | 36.91  | 1700.26  | 7  |
| D4A720_RAT | D4A720 | Serine/arginine-rich splicing factor 7 isoform 2          | Srsf7        | 27.38  | 2400.56  | 5  |
| D4A7U1_RAT | D4A7U1 | Zyxin                                                     | Zyx          | 60.30  | 2967.96  | 8  |
| D4A7U6_RAT | D4A7U6 | U6 snRNA-associated Sm-like protein LSm3                  | Lsm3         | 11.85  | 1542.28  | 2  |
| D4A9L2_RAT | D4A9L2 | Serine/arginine-rich splicing factor 1                    | Srsf1        | 27.75  | 4640.91  | 7  |

|            |        |                                                                         |           |        |          |    |
|------------|--------|-------------------------------------------------------------------------|-----------|--------|----------|----|
| D4A9X7_RAT | D4A9X7 | Hypermethylated in cancer 2 protein                                     | Hic2      | 67.20  | 320.60   | 4  |
| D4AAE9_RAT | D4AAE9 | CDGSH iron-sulfur domain-containing protein 2                           | Cisd2     | 15.29  | 4059.60  | 2  |
| D4ADD7_RAT | D4ADD7 | Glutaredoxin 5                                                          | Glrx5     | 16.43  | 7892.59  | 2  |
| D4ADS9_RAT | D4ADS9 | EFR3 homolog A                                                          | Efr3a     | 92.52  | 558.92   | 13 |
| D4AEG2_RAT | D4AEG2 | Ras-related protein Rab-32                                              | Rab32     | 25.26  | 883.24   | 5  |
| D4AEP0_RAT | D4AEP0 | Adenylosuccinate synthetase isozyme 2                                   | Adss      | 50.09  | 2287.64  | 6  |
| DHSA_RAT   | Q920L2 | Succinate dehydrogenase [ubiquinone] flavoprotein subunit mitochondrial | Sdha      | 71.62  | 3794.74  | 13 |
| DOPD_RAT   | P80254 | D-dopachrome decarboxylase                                              | Ddt       | 13.13  | 650.05   | 3  |
| DUT_RAT    | P70583 | Deoxyuridine 5'-triphosphate nucleotidohydrolase                        | Dut       | 22.00  | 2153.78  | 5  |
| DX39B_RAT  | Q63413 | Spliceosome RNA helicase Ddx39b                                         | Ddx39b    | 49.04  | 1057.85  | 9  |
| E9PSV5_RAT | E9PSV5 | Phosphoserine aminotransferase                                          | Psat1     | 40.49  | 1062.32  | 7  |
| E9PT29_RAT | E9PT29 | ATP-dependent RNA helicase DDX17                                        | Ddx17     | 72.46  | 2327.21  | 10 |
| E9PT65_RAT | E9PT65 | Radixin                                                                 | Rdx       | 68.49  | 645.19   | 8  |
| E9PTW1_RAT | E9PTW1 | Secretory carrier-associated membrane protein                           | Scamp3    | 38.50  | 289.38   | 5  |
| E9PTX9_RAT | E9PTX9 | Solute carrier family 12 member 2                                       | Slc12a2   | 130.37 | 1782.78  | 12 |
| E9PU78_RAT | E9PU78 | Isoform Bcl-X(S) of Bcl-2-like protein 1                                | ---       | 19.06  | 348.72   | 3  |
| EF1A1_RAT  | P62630 | Elongation factor 1-alpha 1                                             | Eef1a1    | 50.11  | 16649.03 | 11 |
| EF1G_RAT   | Q68FR6 | Elongation factor 1-gamma                                               | Eef1g     | 50.06  | 1306.83  | 8  |
| EF2_RAT    | P05197 | Elongation factor 2                                                     | Eef2      | 95.28  | 17558.08 | 34 |
| ENOA_RAT   | P04764 | Alpha-enolase                                                           | Eno1      | 47.13  | 67299.46 | 25 |
| ENOB_RAT   | P15429 | Beta-enolase                                                            | Eno3      | 47.01  | 12346.33 | 12 |
| ENPL_RAT   | Q66HD0 | Endoplasmin                                                             | Hsp90b1   | 92.77  | 8923.66  | 26 |
| ERO1A_RAT  | Q8R4A1 | ERO1-like protein alpha                                                 | Ero1a     | 54.02  | 1337.72  | 9  |
| ERP29_RAT  | P52555 | Endoplasmic reticulum resident protein 29                               | Erp29     | 28.58  | 5384.18  | 4  |
| EZRI_RAT   | P31977 | Ezrin                                                                   | Ezr       | 69.39  | 3834.35  | 13 |
| F10A1_RAT  | P50503 | Hsc70-interacting protein                                               | St13      | 41.28  | 3653.34  | 7  |
| F1LM33_RAT | F1LM33 | Leucine-rich PPR motif-containing protein mitochondrial isoform         | Lrpprc    | 156.68 | 666.82   | 18 |
| F1LM66_RAT | F1LM66 | 116 kDa U5 small nuclear ribonucleoprotein component                    | Eftud2    | 109.35 | 1261.28  | 7  |
| F1LM82_RAT | F1LM82 | Heterogeneous nuclear ribonucleoproteins A2/B1                          | Hnrnpa2b1 | 32.47  | 6670.34  | 10 |
| F1LMM5_RAT | F1LMM5 | Arachidonate 5-lipoxygenase                                             | Alox5     | 78.13  | 1841.63  | 16 |
| F1LMP7_RAT | F1LMP7 | Granulins                                                               | Grn       | 56.65  | 838.66   | 7  |
| F1LPV0_RAT | F1LPV0 | Asparagine--tRNA ligase, cytoplasmic                                    | Nars      | 64.13  | 788.27   | 9  |
| F1LQ81_RAT | F1LQ81 | Vesicle-fusing ATPase                                                   | Nsf       | 82.63  | 4215.60  | 17 |
| F1LQJ7_RAT | F1LQJ7 | Phosphoenolpyruvate carboxykinase [GTP], mitochondrial                  | Pck2      | 71.21  | 471.15   | 8  |
| F1LRK1_RAT | F1LRK1 | Sodium/potassium-transporting ATPase subunit alpha                      | Atp4a     | 114.04 | 92.21    | 11 |
| F1LSN4_RAT | F1LSN4 | Fibroblast growth factor receptor                                       | Fgfr3     | 87.67  | 130.74   | 10 |
| F1LVV4_RAT | F1LVV4 | Protein RCC2                                                            | Rcc2      | 46.65  | 1350.43  | 7  |
| F1LZW6_RAT | F1LZW6 | Solute carrier family 25 member 13                                      | Slc25a13  | 54.10  | 1622.14  | 13 |

|            |        |                                                                     |         |        |          |    |
|------------|--------|---------------------------------------------------------------------|---------|--------|----------|----|
| F1M0G0_RAT | F1M0G0 | Regulator of G-protein signaling 17                                 | Rgs17   | 24.32  | 1702.56  | 6  |
| F1M0J3_RAT | F1M0J3 | Sodium bicarbonate cotransporter 3, isophorm 4                      | Slc4a7  | 126.85 | 406.78   | 11 |
| F1M2K3_RAT | F1M2K3 | Small ubiquitin-related modifier                                    | Sumo2   | 10.77  | 10781.10 | 1  |
| F1M2P8_RAT | F1M2P8 | Protein kinase C alpha                                              | Prkca   | 72.77  | 335.43   | 9  |
| F1M4T3_RAT | B2RYQ5 | Enhancer of rudimentary homolog                                     | Erh     | 12.26  | 520.09   | 2  |
| F1M7T6_RAT | F1M7T6 | Translocon-associated protein subunit gamma                         | Ssr3    | 7.38   | 976.79   | 2  |
| F1M8X9_RAT | F1M8X9 | Golgi brefeldin A-resistant guanine nucleotide exchange factor 1    | Gbf1    | 206.52 | 487.28   | 14 |
| F7EPH4_RAT | F7EPH4 | Inorganic Pyrophosphatase                                           | Ppa1    | 32.77  | 3875.81  | 8  |
| F7EWC1_RAT | F7EWC1 | Vasodilator-stimulated phosphoprotein                               | Vasp    | 39.49  | 418.42   | 5  |
| F7F4S8_RAT | B2RYB8 | Integrin beta 2                                                     | Itgb2   | 84.82  | 658.56   | 12 |
| F7FFV2_RAT | F7FFV2 | keratin 5                                                           | Krt5    | 44.02  | 1939.83  | 7  |
| F7FP91_RAT | Q95II0 | MHC class Ib antigen                                                | RT1-CE5 | 42.23  | 4291.37  | 4  |
| FCERB_RAT  | P13386 | High affinity immunoglobulin epsilon receptor subunit beta          | Ms4a2   | 26.73  | 1896.05  | 4  |
| FEN1_RAT   | Q5XIP6 | Flap endonuclease 1                                                 | Fen1    | 42.61  | 557.15   | 4  |
| FGR_RAT    | Q6P6U0 | Tyrosine-protein kinase Fgr                                         | Fgr     | 58.82  | 140.71   | 5  |
| FKB1A_RAT  | Q62658 | Peptidyl-prolyl cis-trans isomerase FKBP1A                          | Fkbp1a  | 11.92  | 4920.10  | 3  |
| FPPS_RAT   | P05369 | Farnesyl pyrophosphate synthase                                     | Fdps    | 40.83  | 552.94   | 9  |
| G3P_RAT    | P04797 | Glyceraldehyde-3-phosphate dehydrogenase                            | Gapdh   | 35.83  | 31578.66 | 10 |
| G3V679_RAT | G3V679 | Transferrin receptor protein 1                                      | Tfrc    | 85.88  | 840.95   | 15 |
| G3V6D3_RAT | G3V6D3 | ATP synthase subunit beta                                           | Atp5f1b | 56.35  | 30347.52 | 6  |
| G3V6G5_RAT | G3V6G5 | F-box-like/WD repeat-containing protein TBL1X                       | Tbl1x   | 56.80  | 308.26   | 6  |
| G3V6P7_RAT | G3V6P7 | Myosin heavy chain 9                                                | Myh9    | 226.41 | 458.29   | 30 |
| G3V6P8_RAT | G3V6P8 | Guanine nucleotide-binding protein gamma-12                         | Gng12   | 7.99   | 12311.67 | 3  |
| G3V6T7_RAT | G3V6T7 | Protein disulfide-isomerase A4                                      | Pdia4   | 72.75  | 3414.59  | 20 |
| G3V6W2_RAT | G3V6W2 | Prolactin regulatory element-binding protein                        | Preb    | 45.37  | 360.95   | 3  |
| G3V741_RAT | G3V741 | Solute carrier family 25 member 3                                   | Slc25a3 | 39.53  | 10300.27 | 9  |
| G3V7J7_RAT | G3V7J7 | Eukaryotic translation initiation factor 5A-2                       | Eif5a2  | 16.79  | 1875.77  | 6  |
| G3V7Q7_RAT | G3V7Q7 | Ras GTPase-activating-like protein IQGAP1                           | Iqgap1  | 188.83 | 652.63   | 17 |
| G3V852_RAT | G3V852 | Talin-1                                                             | Tln1    | 269.67 | 737.61   | 31 |
| G3V8A5_RAT | G3V8A5 | Vacuolar protein sorting-associated protein 35                      | Vps35   | 91.73  | 564.08   | 9  |
| G3V8C4_RAT | G3V8C4 | Chloride intracellular channel protein 4                            | Clic4   | 28.67  | 4051.87  | 7  |
| G3V8G5_RAT | G3V8G5 | Golgi apparatus protein 1                                           | Glg1    | 133.55 | 545.01   | 9  |
| G3V908_RAT | G3V908 | keratin, type II Kb15                                               | Kb15    | 57.61  | 1787.99  | 7  |
| G3V936_RAT | G3V936 | Citrate synthase                                                    | Cs      | 51.83  | 1051.28  | 10 |
| G3V993_RAT | G3V993 | SAM domain, SH3 domain and nuclear localization signals, 1 (SAMNS1) | Samsn1  | 40.73  | 2311.95  | 8  |
| G3V9A3_RAT | G3V9A3 | 14-3-3 protein sigma                                                | Sfn     | 27.75  | 2008.64  | 5  |
| G3V9U7_RAT | G3V9U7 | Sarcoplasmic/endoplasmic reticulum calcium ATPase 3 (SERCA3)        | Atp2a3  | 109.37 | 317.82   | 15 |
| GBB1_RAT   | P54311 | Transducin beta-1                                                   | Gnb1    | 37.38  | 310.34   | 10 |

|           |        |                                                                     |                             |        |          |    |
|-----------|--------|---------------------------------------------------------------------|-----------------------------|--------|----------|----|
| GBB2_RAT  | P54313 | Transducin beta-2                                                   | Gnb2                        | 37.33  | 1658.05  | 9  |
| GDIA_RAT  | P50398 | Rab GDP dissociation inhibitor alpha                                | Gdi1                        | 50.54  | 2846.46  | 9  |
| GDIB_RAT  | P50399 | Rab GDP dissociation inhibitor beta                                 | Gdi2                        | 50.54  | 8115.68  | 11 |
| GDIR1_RAT | Q5XI73 | Rho GDP dissociation inhibitor 1                                    | Arhgdia                     | 23.41  | 45101.02 | 7  |
| GELS_RAT  | Q68FP1 | Gelsolin                                                            | Gsn                         | 86.07  | 1453.52  | 10 |
| GFAP_RAT  | P47819 | Glial fibrillary acidic protein                                     | Gfap                        | 49.96  | 161.47   | 5  |
| GLOD4_RAT | Q5I0D1 | Glyoxalase domain-containing protein 4                              | Glod4                       | 33.27  | 2020.22  | 8  |
| GNAI2_RAT | P04897 | Guanine nucleotide-binding protein G(i) subunit alpha-2             | Gnai2                       | 40.50  | 4498.67  | 16 |
| GNAI3_RAT | P08753 | Guanine nucleotide-binding protein G(k) subunit alpha               | Gnai3                       | 40.52  | 1366.32  | 10 |
| GNAS1_RAT | Q63803 | Guanine nucleotide-binding protein G(s) subunit alpha isoforms XLas | Gnas                        | 122.89 | 1083.32  | 3  |
| GNAS2_RAT | P63095 | Guanine nucleotide-binding protein G(s) subunit alpha               | Gnas                        | 45.66  | 1301.58  | 8  |
| GNAZ_RAT  | P19627 | Guanine nucleotide-binding protein G(z) subunit alpha               | Gnaz                        | 40.88  | 1912.17  | 8  |
| GPDM_RAT  | P35571 | Glycerol-3-phosphate dehydrogenase mitochondrial                    | Gpd2                        | 80.97  | 413.42   | 8  |
| GRP75_RAT | P48721 | Mortalin                                                            | Hspa9                       | 73.86  | 4225.23  | 16 |
| GRP78_RAT | P06761 | Endoplasmic reticulum chaperone BiP                                 | Hspa5                       | 72.35  | 23724.92 | 28 |
| GTR1_RAT  | P11167 | Solute carrier family 2, facilitated glucose transporter member 1   | Slc2a1                      | 53.96  | 797.33   | 3  |
| GTR3_RAT  | Q07647 | Solute carrier family 2, facilitated glucose transporter member 3   | Slc2a3                      | 53.58  | 4665.32  | 9  |
| H14_RAT   | P15865 | Histone H1.4                                                        | Hist1h1e                    | 21.99  | 3178.50  | 6  |
| H4_RAT    | P62804 | Histone H4                                                          | Hist1h4b; Hist1h4m; Hist4h4 | 11.37  | 2107.98  | 4  |
| HAP28_RAT | Q62785 | 28 kDa heat- and acid-stable phosphoprotein                         | Pdap1                       | 20.61  | 3318.89  | 3  |
| HMCS1_RAT | P17425 | Hydroxymethylglutaryl-CoA synthase cytoplasmic                      | Hmgcs1                      | 57.43  | 1203.94  | 9  |
| HS90A_RAT | P82995 | Heat shock protein HSP 90-alpha                                     | Hsp90aa1                    | 84.82  | 16741.41 | 27 |
| HS90B_RAT | P34058 | Heat shock protein HSP 90-beta                                      | Hsp90ab1                    | 83.28  | 34505.82 | 32 |
| HSP72_RAT | P14659 | Heat shock-related 70 kDa protein 2                                 | Hspa2                       | 69.64  | 24993.69 | 16 |
| HSP74_RAT | O88600 | Heat shock 70 kDa protein 4                                         | Hspa4                       | 94.06  | 3185.07  | 22 |
| HXK1_RAT  | P05708 | Hexokinase-1                                                        | Hk1                         | 102.41 | 352.55   | 17 |
| HXK2_RAT  | P27881 | Hexokinase-2                                                        | Hk2                         | 102.54 | 79.98    | 6  |
| ICK_RAT   | Q62726 | Serine/threonine-protein kinase ICK                                 | Ick                         | 70.57  | 130.74   | 3  |
| IF4A2_RAT | Q5RKI1 | Eukaryotic initiation factor 4A-II                                  | Eif4a2                      | 46.40  | 4299.29  | 10 |
| IF4A3_RAT | Q3B8Q2 | Eukaryotic initiation factor 4A-III                                 | Eif4a3                      | 46.84  | 709.67   | 7  |
| IF5A1_RAT | Q3T1J1 | Eukaryotic translation initiation factor 5A-1                       | Eif5a                       | 16.83  | 2240.27  | 7  |
| IF6_RAT   | Q3KRD8 | Eukaryotic translation initiation factor 6                          | Eif6                        | 26.57  | 2731.00  | 5  |
| ILEUA_RAT | Q4G075 | Leukocyte elastase inhibitor                                        | Serpinb1a                   | 42.73  | 1485.99  | 8  |
| ILRL1_RAT | Q62611 | Interleukin 1 receptor-like 1                                       | Il1rl1                      | 64.41  | 970.66   | 10 |
| IMB1_RAT  | P52296 | Importin subunit beta-1                                             | Kpnb1                       | 97.12  | 727.21   | 10 |
| IMMT_RAT  | Q3KR86 | MICOS complex subunit Mic60                                         | Immt                        | 67.18  | 2906.70  | 13 |
| ITFG3_RAT | Q5M7W6 | Protein FAM234A                                                     | Fam234a                     | 60.64  | 348.83   | 7  |
| ITM2C_RAT | Q5PQL7 | Integral membrane protein 2C                                        | Itm2c                       | 30.48  | 2043.92  | 5  |

|            |        |                                                               |         |        |          |     |
|------------|--------|---------------------------------------------------------------|---------|--------|----------|-----|
| K1C10_RAT  | Q6IFW6 | Keratin, type I cytoskeletal 10                               | Krt10   | 56.51  | 299.44   | 6   |
| K1C14_RAT  | Q6IFV1 | Keratin, type I cytoskeletal 14                               | Krt14   | 52.68  | 662.16   | 7   |
| K1C15_RAT  | Q6IFV3 | Keratin, type I cytoskeletal 15                               | Krt15   | 48.87  | 703.90   | 11  |
| K1C17_RAT  | Q6IFU8 | Keratin, type I cytoskeletal 17                               | Krt17   | 48.12  | 706.33   | 8   |
| K2C1_RAT   | Q6IMF3 | Keratin, type II cytoskeletal 1                               | Krt1    | 64.83  | 2068.50  | 11  |
| K2C1B_RAT  | Q6IG01 | Keratin, type II cytoskeletal 1B                              | Krt77   | 57.26  | 936.67   | 7   |
| K2C5_RAT   | Q6P6Q2 | Keratin, type II cytoskeletal 5                               | Krt5    | 61.83  | 1967.47  | 8   |
| K2C6A_RAT  | Q4FZU2 | Keratin, type II cytoskeletal 6A                              | Krt6a   | 59.25  | 2511.33  | 7   |
| K2C73_RAT  | Q6IG03 | Keratin, type II cytoskeletal 73                              | Krt73   | 60.39  | 1167.59  | 7   |
| K2C75_RAT  | Q6IG05 | Keratin, type II cytoskeletal 75                              | Krt75   | 59.03  | 1766.46  | 9   |
| K2C8_RAT   | Q10758 | Keratin, type II cytoskeletal 8                               | Krt8    | 54.02  | 99.78    | 8   |
| KAP0_RAT   | P09456 | cAMP-dependent protein kinase type I-alpha regulatory subunit | Prkar1a | 43.10  | 5804.33  | 8   |
| KCY_RAT    | Q4KM73 | UMP-CMP kinase                                                | Cmpk1   | 22.17  | 2624.88  | 6   |
| KPYM_RAT   | P11980 | Pyruvate kinase PKM                                           | Pkm     | 57.82  | 25113.64 | 25  |
| KPYR_RAT   | P12928 | Pyruvate kinase PKLR                                          | Pklr    | 62.20  | 1366.61  | 6   |
| LAP2_RAT   | Q62733 | Lamina-associated polypeptide 2 isoform beta                  | Tmpo    | 50.28  | 2803.44  | 14  |
| LAT_RAT    | O70601 | Linker for activation of T-cells family member 1 (LAT)        | Lat     | 26.19  | 1279.26  | 5   |
| LCK_RAT    | Q01621 | Tyrosine-protein kinase LCK                                   | Lck     | 57.89  | 130.74   | 5.3 |
| LDHA_RAT   | P04642 | L-lactate dehydrogenase A chain                               | Ldha    | 36.45  | 26968.88 | 17  |
| LEG1_RAT   | P11762 | Galectin-1                                                    | Lgals1  | 14.86  | 7991.49  | 4   |
| LPPRC_RAT  | Q5SGE0 | Leucine-rich PPR motif-containing protein mitochondrial       | Lrpprc  | 156.65 | 996.19   | 18  |
| LRC59_RAT  | Q5RJR8 | Leucine-rich repeat-containing protein 59                     | Lrrc59  | 34.87  | 1701.89  | 6   |
| LTOR1_RAT  | Q6P791 | Ragulator complex protein LAMTOR1                             | Lamtor1 | 17.72  | 3092.09  | 5   |
| LYN_RAT    | Q07014 | Tyrosine-protein kinase Lyn                                   | Lyn     | 58.66  | 590.98   | 17  |
| M0R5K9_RAT | M0R5K9 | 40S ribosomal protein S18                                     | ---     | 17.66  | 2436.05  | 5   |
| M0R866_RAT | M0R866 | Uncharacterized protein                                       | ---     | 27.02  | 1094.06  | 7   |
| M0R9L0_RAT | M0R9L0 | Nascent polypeptide-associated complex subunit alpha          | Naca    | 220.20 | 6601.05  | 14  |
| M0RAU0_RAT | M0RAU0 | Advanced glycosylation end product-specific receptor          | Ager    | 13.93  | 2946.14  | 2   |
| M0RDJ4_RAT | M0RDJ4 | Glia maturation factor beta                                   | Gmfb    | 16.45  | 2318.48  | 5   |
| MAK_RAT    | P20793 | Serine/threonine-protein kinase MAK                           | Mak     | 69.90  | 130.74   | 4.3 |
| MANF_RAT   | P0C5H9 | Mesencephalic astrocyte-derived neurotrophic factor           | Manf    | 20.39  | 1906.83  | 6   |
| MARE1_RAT  | Q66HR2 | Microtubule-associated protein RP/EB family member 1          | Mapre1  | 30.00  | 3227.68  | 7   |
| MDHC_RAT   | O88989 | Malate dehydrogenase cytoplasmic                              | Mdh1    | 36.48  | 5681.27  | 10  |
| MDHM_RAT   | P04636 | Malate dehydrogenase mitochondrial                            | Mdh2    | 35.68  | 29096.08 | 15  |
| MK03_RAT   | P21708 | Mitogen-activated protein kinase 3                            | Mapk3   | 43.08  | 795.09   | 5   |
| MOT1_RAT   | P53987 | Monocarboxylate transporter 1                                 | Slc16a1 | 53.24  | 1041.20  | 2   |
| MPRD_RAT   | Q6AY20 | Cation-dependent mannose-6-phosphate receptor                 | M6pr    | 31.10  | 2601.04  | 6   |
| MTPN_RAT   | P62775 | Myotrophin                                                    | Mtpn    | 12.86  | 17148.85 | 1   |

|           |        |                                                                         |          |        |          |     |
|-----------|--------|-------------------------------------------------------------------------|----------|--------|----------|-----|
| MYL6_RAT  | Q64119 | Myosin light polypeptide 6                                              | Myl6     | 16.98  | 4308.61  | 5   |
| NCF2_RAT  | A7E3N2 | Neutrophil cytosol factor 2                                             | Ncf2     | 59.57  | 292.81   | 7   |
| NCPR_RAT  | P00388 | NADPH--cytochrome P450 reductase                                        | Por      | 76.96  | 850.87   | 14  |
| NDKA_RAT  | Q05982 | Nucleoside diphosphate kinase A                                         | Nme1     | 17.19  | 13543.53 | 6   |
| NDKB_RAT  | P19804 | Nucleoside diphosphate kinase B                                         | Nme2     | 17.28  | 10973.40 | 5   |
| NDUS1_RAT | Q66HF1 | NADH-ubiquinone oxidoreductase 75 kDa subunit mitochondrial             | Ndufs1   | 79.41  | 478.50   | 12  |
| NDUV2_RAT | P19234 | NADH dehydrogenase [ubiquinone] flavoprotein 2 mitochondrial            | Ndufv2   | 27.38  | 1011.01  | 5   |
| NEDD4_RAT | Q62940 | E3 ubiquitin-protein ligase NEDD4                                       | Nedd4    | 102.40 | 725.16   | 9   |
| NHRF1_RAT | Q9JJ19 | Na(+)/H(+) exchange regulatory cofactor NHE-RF1                         | Slc9a3r1 | 38.83  | 404.97   | 8   |
| NICA_RAT  | Q8CGU6 | Nicastrin                                                               | Ncstn    | 78.40  | 574.06   | 5   |
| NP1L4_RAT | Q5U2Z3 | Nucleosome assembly protein 1-like 4                                    | Nap1l4   | 43.92  | 586.05   | 3   |
| NPM_RAT   | P13084 | Nucleophosmin                                                           | Npm1     | 32.56  | 2741.26  | 2.8 |
| NQO1_RAT  | P05982 | NAD(P)H dehydrogenase [quinone] 1                                       | Nqo1     | 30.95  | 30225.76 | 8   |
| NSDHL_RAT | Q5PPL3 | Sterol-4-alpha-carboxylate 3-dehydrogenase decarboxylating              | Nsdhl    | 40.41  | 281.17   | 5   |
| NSF1C_RAT | O35987 | NSFL1 cofactor p47                                                      | Nsf1c    | 40.68  | 2478.01  | 10  |
| NTF2_RAT  | P61972 | Nuclear transport factor 2                                              | Nutf2    | 14.48  | 2377.15  | 3   |
| NUCL_RAT  | P13383 | Nucleolin                                                               | Ncl      | 77.15  | 2332.35  | 17  |
| ODP2_RAT  | P08461 | Pyruvate dehydrogenase component E2                                     | Dlat     | 67.17  | 986.99   | 8   |
| ORN_RAT   | Q5U1X1 | Oligoribonuclease mitochondrial                                         | Rexo2    | 26.75  | 617.30   | 7   |
| OTUB1_RAT | B2RYG6 | Ubiquitin thioesterase OTUB1                                            | Otub1    | 31.27  | 1483.33  | 6   |
| PAIRB_RAT | Q6AXS5 | Plasminogen activator inhibitor 1 RNA-binding protein                   | Serbp1   | 44.75  | 10414.05 | 8   |
| PARK7_RAT | O88767 | Protein/nucleic acid deglycase DJ-1                                     | Park7    | 19.97  | 12049.97 | 7   |
| PCNA_RAT  | P04961 | Proliferating cell nuclear antigen                                      | Pcna     | 28.75  | 8018.69  | 7   |
| PDIA1_RAT | P04785 | Protein disulfide-isomerase                                             | P4hb     | 56.95  | 17035.55 | 26  |
| PDIA3_RAT | P11598 | Protein disulfide-isomerase A3                                          | Pdia3    | 56.62  | 13336.71 | 26  |
| PDIA6_RAT | Q63081 | Protein disulfide-isomerase A6                                          | Pdia6    | 48.17  | 10114.17 | 11  |
| PEBP1_RAT | P31044 | Phosphatidylethanolamine-binding protein 1                              | Pebp1    | 20.80  | 34833.09 | 8   |
| PGAM1_RAT | P25113 | Phosphoglycerate mutase 1                                               | Pgam1    | 28.83  | 15635.43 | 9   |
| PGH2_RAT  | P35355 | Prostaglandin G/H synthase 2                                            | Ptgs2    | 69.16  | 334.63   | 7   |
| PGK1_RAT  | P16617 | Phosphoglycerate kinase 1                                               | Pgk1     | 44.54  | 24901.38 | 19  |
| PGRC1_RAT | P70580 | Membrane-associated progesterone receptor component 1                   | Pgrmc1   | 21.60  | 505.15   | 4   |
| PHB_RAT   | P67779 | Prohibitin                                                              | Phb      | 29.82  | 4371.60  | 12  |
| PHB2_RAT  | Q5XIH7 | Prohibitin 2                                                            | Phb2     | 33.31  | 1214.79  | 8   |
| PLS1_RAT  | P58195 | Phospholipid scramblase 1                                               | Plscr1   | 36.71  | 679.03   | 5   |
| PP2AA_RAT | P63331 | Serine/threonine-protein phosphatase 2A catalytic subunit alpha isoform | Ppp2ca   | 35.61  | 674.64   | 6   |
| PPIA_RAT  | P10111 | Peptidyl-prolyl cis-trans isomerase A                                   | Ppia     | 17.87  | 47501.08 | 12  |
| PPIB_RAT  | P24368 | Peptidyl-prolyl cis-trans isomerase B                                   | Ppib     | 23.80  | 6691.57  | 11  |
| PRAF3_RAT | Q9ES40 | PRA1 family protein 3                                                   | Arl6ip5  | 21.55  | 717.39   | 3   |



|            |        |                                                                                   |           |        |          |     |
|------------|--------|-----------------------------------------------------------------------------------|-----------|--------|----------|-----|
| PRDX1_RAT  | Q63716 | Peroxiredoxin-1                                                                   | Prdx1     | 22.11  | 29448.13 | 11  |
| PRDX2_RAT  | P35704 | Peroxiredoxin-2                                                                   | Prdx2     | 21.78  | 4001.95  | 6   |
| PROF1_RAT  | P62963 | Profilin-1                                                                        | Pfn1      | 14.96  | 50467.21 | 7   |
| PUR9_RAT   | O35567 | Bifunctional purine biosynthesis protein PURH                                     | Atic      | 64.21  | 3332.23  | 15  |
| PYGL_RAT   | P09811 | Glycogen phosphorylase liver form                                                 | Pygl      | 97.48  | 289.66   | 13  |
| Q2I6B2_RAT | Q2I6B2 | V-type proton ATPase subunit A1                                                   | Atp6v0a1  | 95.59  | 1994.21  | 15  |
| Q32PX6_RAT | Q32PX6 | Rho-related GTP-binding protein RhoG                                              | Rhog      | 21.31  | 12262.52 | 8   |
| Q4G002_RAT | Q4G002 | Histocompatibility 2 T region locus 24                                            | RT1-T24-4 | 42.46  | 4123.62  | 4   |
| Q4KM97_RAT | Q4KM97 | Tyrosine-protein kinase BLK                                                       | Blk       | 56.65  | 226.26   | 8   |
| Q4V7D1_RAT | Q4V7D1 | Translocon-associated protein subunit alpha                                       | Ssr1      | 32.21  | 1369.80  | 3   |
| Q4V7D9_RAT | Q4V7D9 | Acid sphingomyelinase-like phosphodiesterase 3B                                   | Smpdl3b   | 51.65  | 2105.85  | 7   |
| Q5M7T6_RAT | Q5M7T6 | V-type proton ATPase subunit D 1                                                  | Atp6v0d1  | 40.30  | 843.55   | 11  |
| Q5M860_RAT | Q5M860 | Rho GDP dissociation inhibitor 2                                                  | Arhgdib   | 22.88  | 33388.18 | 9   |
| Q5RJK5_RAT | Q5RJK5 | Chromobox 3                                                                       | Cbx3      | 20.81  | 7670.66  | 5   |
| Q5U1Y2_RAT | Q5U1Y2 | Ras-related C3 botulinum toxin substrate 2 (Rac2)                                 | Rac2      | 21.44  | 9647.45  | 7   |
| Q5U362_RAT | Q5U362 | Annexin A4                                                                        | Anxa4     | 35.89  | 1216.83  | 7   |
| Q5U3Z7_RAT | Q5U3Z7 | Serine hydroxymethyltransferase                                                   | Shmt2     | 55.77  | 2111.16  | 11  |
| Q5XI34_RAT | Q5XI34 | Serine/threonine-protein phosphatase 2A 65 kDa regulatory subunit A alpha isoform | Ppp2r1a   | 65.32  | 510.75   | 10  |
| Q5XI38_RAT | Q5XI38 | Lymphocyte cytosolic protein 1                                                    | Lcp1      | 70.12  | 4833.94  | 12  |
| Q5XI77_RAT | Q5XI77 | Annexin A11                                                                       | Anxa11    | 54.16  | 2775.25  | 11  |
| Q5XIM7_RAT | Q5XIM7 | Lysine--tRNA ligase                                                               | Kars      | 71.62  | 319.66   | 10  |
| Q5XIV1_RAT | Q5XIV1 | Phosphoglycerate kinase 2                                                         | Pgk2      | 45.01  | 4224.74  | 9   |
| Q63116_RAT | Q63116 | Mast/stem cell growth factor receptor                                             | Kit       | 109.34 | 274.17   | 12  |
| Q68FX4_RAT | Q68FX4 | Hematopoietic cell-specific LYN substrate 1 (hcls1)                               | Hcls1     | 52.82  | 1030.79  | 8   |
| Q6AYD3_RAT | Q6AYD3 | Proliferation-associated protein 2G4                                              | Pa2g4     | 43.66  | 2398.25  | 11  |
| Q6AYI1_RAT | Q6AYI1 | Probable ATP-dependent RNA helicase DDX5                                          | Ddx5      | 69.24  | 2618.88  | 14  |
| Q6IFU9_RAT | Q6IFU9 | keratin 16                                                                        | Krt16     | 50.78  | 550.92   | 6   |
| Q6IN37_RAT | Q6IN37 | GM2 ganglioside activator                                                         | Gm2a      | 21.49  | 13499.93 | 5   |
| Q6MGA3_RAT | Q6MGA3 | Antigen peptide transporter 2                                                     | Tap2      | 77.75  | 710.30   | 7   |
| Q6P3V8_RAT | Q6P3V8 | Eukaryotic initiation factor 4A-I                                                 | Eif4a1    | 46.15  | 7441.99  | 10  |
| Q6P685_RAT | Q6P685 | Eukaryotic translation initiation factor 2 subunit 2                              | Eif2s2    | 38.24  | 2854.59  | 6   |
| Q6P6T6_RAT | Q6P6T6 | Cathepsin D                                                                       | Ctsd      | 44.62  | 7200.07  | 10  |
| Q6TXF3_RAT | Q6TXF3 | Acyl-CoA-binding protein                                                          | Dbi       | 66.45  | 9389.79  | 5   |
| Q76GL9_RAT | Q76GL9 | Neutral amino acid transporter A                                                  | Slc1a4    | 55.90  | 585.50   | 2   |
| Q78P65_RAT | Q78P65 | Rap2A-like protein                                                                | Rap2a     | 11.95  | 1466.66  | 7.6 |
| Q7TP15_RAT | Q7TP15 | S-methyl-5'-thioadenosine phosphorylase                                           | Mtap      | 43.08  | 549.50   | 3   |
| Q9JKB7_RAT | Q9JKB7 | Guanine deaminase                                                                 | Gda       | 50.90  | 1391.87  | 10  |
| Q9QX80_RAT | Q9QX80 | Heterogeneous nuclear ribonucleoprotein A/B                                       | Hnrnpab   | 30.85  | 4882.10  | 6   |

|            |        |                                                                         |         |        |          |     |
|------------|--------|-------------------------------------------------------------------------|---------|--------|----------|-----|
| QCR1_RAT   | Q68FY0 | Cytochrome b-c1 complex subunit 1 mitochondrial                         | Uqcrc1  | 52.85  | 2700.23  | 9   |
| QCR2_RAT   | P32551 | Cytochrome b-c1 complex subunit 2 mitochondrial                         | Uqcrc2  | 48.40  | 2697.00  | 10  |
| QCR6_RAT   | Q5M9I5 | Cytochrome b-c1 complex subunit 6 mitochondrial                         | Uqcrh   | 10.42  | 13352.32 | 1   |
| R9PXR7_RAT | B2GV92 | Prostaglandin E synthase 3                                              | Ptges3  | 18.72  | 1704.81  | 7   |
| R9PXU4_RAT | R9PXU4 | Thioredoxin reductase 1 cytoplasmic                                     | Txnrd1  | 54.51  | 651.76   | 6   |
| RAB15_RAT  | P35289 | Ras-related protein Rab-15                                              | Rab15   | 24.28  | 441.17   | 3   |
| RAB1A_RAT  | Q6NYB7 | Ras-related protein Rab-1a                                              | Rab1A   | 22.68  | 18707.79 | 9   |
| RAB2A_RAT  | P05712 | Ras-related protein Rab-2a                                              | Rab2a   | 23.54  | 5913.19  | 9   |
| RAB35_RAT  | Q5U316 | Ras-related protein Rab-35                                              | Rab35   | 23.03  | 9690.18  | 4   |
| RAB4B_RAT  | P51146 | Ras-related protein Rab-4b                                              | Rab4b   | 23.63  | 7202.53  | 5   |
| RAB7A_RAT  | P09527 | Ras-related protein Rab-7a                                              | Rab7a   | 23.50  | 2888.40  | 8   |
| RAB8B_RAT  | P70550 | Ras-related protein Rab-8b                                              | Rab8b   | 23.60  | 8159.46  | 5   |
| RAC1_RAT   | Q6RUV5 | Ras-related C3 botulinum toxin substrate 1 (Rac1)                       | Rac1    | 21.45  | 7675.92  | 6   |
| RACK1_RAT  | P63245 | Receptor of activated protein C kinase 1 (RACK1)                        | Rack1   | 35.08  | 10611.07 | 13  |
| RAN_RAT    | P62828 | GTP-binding nuclear protein Ran                                         | Ran     | 24.42  | 25542.29 | 8   |
| RAP1A_RAT  | P62836 | Ras-related protein Rap-1a                                              | Rap1a   | 20.99  | 5357.49  | 8   |
| RAP1B_RAT  | Q62636 | Ras-related protein Rap-1b                                              | Rap1b   | 20.80  | 9674.37  | 9   |
| RAP2B_RAT  | P61227 | Ras-related protein Rap-2b                                              | Rap2b   | 20.50  | 4624.50  | 6   |
| RB11B_RAT  | O35509 | Ras-related protein Rab-11b                                             | Rab11b  | 24.49  | 4738.40  | 5   |
| RGS19_RAT  | O70521 | Regulator of G-protein signaling 19                                     | Rgs19   | 24.74  | 2000.75  | 6   |
| RHOA_RAT   | P61589 | Transforming protein RhoA                                               | Rhoa    | 21.78  | 13836.53 | 7   |
| RL10A_RAT  | P62907 | 60S ribosomal protein L10a                                              | Rpl10a  | 24.83  | 1439.95  | 6   |
| RL30_RAT   | P62890 | 60S ribosomal protein L30                                               | Rpl30   | 12.78  | 3993.24  | 3   |
| RL40_RAT   | P62986 | Ubiquitin-60S ribosomal protein L40                                     | Uba52   | 14.73  | 35049.19 | 6   |
| RL5_RAT    | P09895 | 60S ribosomal protein L5                                                | Rpl5    | 34.46  | 1356.49  | 9   |
| RL7_RAT    | P05426 | 60S ribosomal protein L7                                                | Rpl7    | 30.33  | 809.21   | 2.3 |
| RLA1_RAT   | P19944 | 60S acidic ribosomal protein P1                                         | Rplp1   | 11.50  | 14697.37 | 3   |
| RLA2_RAT   | P02401 | 60S acidic ribosomal protein P2                                         | Rplp2   | 11.69  | 11381.50 | 4   |
| ROA3_RAT   | Q6URK4 | Heterogeneous nuclear ribonucleoprotein A3                              | Hnrnpa3 | 39.65  | 1531.91  | 7   |
| RPN1_RAT   | P07153 | Dolichyl-diphosphooligosaccharide protein glycosyltransferase subunit 1 | Rpn1    | 68.30  | 4482.31  | 18  |
| RPN2_RAT   | P25235 | Dolichyl-diphosphooligosaccharide protein glycosyltransferase subunit 2 | Rpn2    | 69.08  | 2932.00  | 9   |
| RS19_RAT   | P17074 | 40S ribosomal protein S19                                               | Rps19   | 16.09  | 2635.92  | 5   |
| RS28_RAT   | P62859 | 40S ribosomal protein S28                                               | Rps28   | 7.84   | 11656.72 | 2   |
| RS3_RAT    | P62909 | 40S ribosomal protein S3                                                | Rps3    | 26.67  | 3086.85  | 11  |
| RS7_RAT    | P62083 | 40S ribosomal protein S7                                                | Rps7    | 22.13  | 1601.40  | 4   |
| RS8_RAT    | P62243 | 40S ribosomal protein S8                                                | Rps8    | 24.21  | 2727.93  | 7   |
| RSSA_RAT   | P38983 | 40S ribosomal protein SA                                                | Rpsa    | 32.82  | 15306.53 | 7   |
| RTN4_RAT   | Q9JK11 | Reticulon-4                                                             | Rtn4    | 126.39 | 600.97   | 11  |

|           |        |                                                             |         |        |          |    |
|-----------|--------|-------------------------------------------------------------|---------|--------|----------|----|
| S38A2_RAT | Q9JHE5 | Sodium-coupled neutral amino acid transporter 2             | Slc38a2 | 55.55  | 1988.21  | 3  |
| SAE1_RAT  | Q6AXQ0 | SUMO-activating enzyme subunit 1                            | Sae1    | 38.51  | 1620.00  | 6  |
| SAP_RAT   | P10960 | Prosaposin                                                  | Psap    | 61.12  | 2213.07  | 10 |
| SC22B_RAT | Q4KM74 | Vesicle-trafficking protein SEC22b                          | Sec22b  | 24.74  | 3487.08  | 6  |
| SEPT2_RAT | Q91Y81 | Septin-2                                                    | Sept2   | 41.59  | 701.70   | 5  |
| SERA_RAT  | O08651 | D-3-phosphoglycerate dehydrogenase                          | Phgdh   | 56.49  | 1111.31  | 9  |
| SET_RAT   | Q63945 | Protein SET                                                 | Set     | 33.41  | 6928.88  | 4  |
| SFXN1_RAT | Q63965 | Sideroflexin-1                                              | Sfxn1   | 35.55  | 1833.89  | 7  |
| SNAA_RAT  | P54921 | Alpha-soluble NSF attachment protein (SNAP-alpha)           | Napa    | 33.19  | 486.89   | 8  |
| SND1_RAT  | Q66X93 | Staphylococcal nuclease domain-containing protein 1         | Snd1    | 101.95 | 5635.33  | 25 |
| SODC_RAT  | P07632 | Superoxide dismutase [Cu-Zn]                                | Sod1    | 15.91  | 19388.87 | 8  |
| SRSF2_RAT | Q6PDU1 | Serine/arginine-rich splicing factor 2                      | Srsf2   | 25.48  | 2693.82  | 5  |
| STX12_RAT | G3V7P1 | Syntaxin-12                                                 | Stx12   | 31.19  | 2343.64  | 8  |
| SYAC_RAT  | P50475 | Alanine--tRNA ligase cytoplasmic                            | Aars    | 106.79 | 410.41   | 13 |
| SYG_RAT   | Q5I0G4 | Glycine--tRNA ligase                                        | Gars    | 72.03  | 1604.88  | 13 |
| SYSC_RAT  | Q6P799 | Serine--tRNA ligase cytoplasmic                             | Sars    | 58.59  | 895.43   | 8  |
| SYYC_RAT  | Q4KM49 | Tyrosine--tRNA ligase cytoplasmic                           | Yars    | 59.12  | 1173.85  | 16 |
| TAGL2_RAT | Q5XFX0 | Transgelin-2                                                | Tagln2  | 22.39  | 23459.84 | 10 |
| TBA1A_RAT | P68370 | Tubulin alpha-1A                                            | Tuba1a  | 50.14  | 42173.61 | 17 |
| TBA1C_RAT | Q6AYZ1 | Tubulin alpha-1C                                            | Tuba1c  | 49.94  | 28941.29 | 15 |
| TBA4A_RAT | Q5XIF6 | Tubulin alpha-4A                                            | Tuba4a  | 49.92  | 12377.59 | 13 |
| TBB2A_RAT | P85108 | Tubulin beta-2A                                             | Tubb2a  | 49.91  | 31653.95 | 16 |
| TBB2B_RAT | Q3KRE8 | Tubulin beta-2B                                             | Tubb2b  | 49.95  | 31408.71 | 17 |
| TBB3_RAT  | Q4QRB4 | Tubulin beta-3                                              | Tubb3   | 50.42  | 9224.14  | 11 |
| TBB4B_RAT | Q6P9T8 | Tubulin beta-4B                                             | Tubb4b  | 49.80  | 10186.00 | 16 |
| TBB5_RAT  | P69897 | Tubulin beta-5                                              | Tubb5   | 49.67  | 38708.10 | 16 |
| TCP4_RAT  | Q63396 | Activated RNA polymerase II transcriptional coactivator p15 | Sub1    | 14.44  | 3159.79  | 4  |
| TERA_RAT  | P46462 | Transitional endoplasmic reticulum ATPase                   | Vcp     | 89.35  | 1961.14  | 16 |
| THIO_RAT  | P11232 | Thioredoxin                                                 | Txn     | 11.67  | 19963.77 | 5  |
| THY1_RAT  | P01830 | Thy-1 membrane glycoprotein                                 | Thy1    | 18.17  | 1348.38  | 5  |
| TKT_RAT   | P50137 | Transketolase                                               | Tkt     | 67.64  | 16757.68 | 22 |
| TM165_RAT | Q4V899 | Transmembrane protein 165                                   | Tmem165 | 34.81  | 1066.11  | 4  |
| TMED7_RAT | D3ZTX0 | Transmembrane emp24 domain-containing protein 7             | Tmed7   | 25.48  | 2409.23  | 5  |
| TMED9_RAT | Q5I0E7 | Transmembrane emp24 domain-containing protein 9             | Tmed9   | 27.03  | 6239.15  | 7  |
| TMEDA_RAT | Q63584 | Transmembrane emp24 domain-containing protein 10            | Tmed10  | 24.86  | 3549.54  | 5  |
| TPIS_RAT  | P48500 | Triosephosphate isomerase                                   | Tpi1    | 26.85  | 19579.29 | 12 |
| TPM3_RAT  | Q63610 | Tropomyosin alpha-3                                         | Tpm3    | 29.01  | 2366.42  | 13 |
| TPM4_RAT  | P09495 | Tropomyosin alpha-4                                         | Tpm4    | 28.51  | 8519.55  | 15 |

|           |        |                                                                          |          |        |          |     |
|-----------|--------|--------------------------------------------------------------------------|----------|--------|----------|-----|
| TRPV2_RAT | Q9WUD2 | Transient receptor potential cation channel subfamily V member 2 (TRPV2) | Trpv2    | 86.71  | 1115.42  | 14  |
| TRY1_RAT  | P00762 | Anionic trypsin-1                                                        | Prss1    | 25.96  | 1052.53  | 1   |
| TSH3_RAT  | D3ZKB9 | Teashirt homolog 3                                                       | Tshz3    | 117.46 | 233.93   | 7.8 |
| TXNL1_RAT | Q920J4 | Thioredoxin-like protein 1                                               | Txn1l    | 32.25  | 4646.14  | 8   |
| TYB4_RAT  | P62329 | Thymosin beta-4                                                          | Tmsb4x   | 5.05   | 23782.26 | 2   |
| UBA1_RAT  | Q5U300 | Ubiquitin-like modifier-activating enzyme 1                              | Uba1     | 117.79 | 5052.02  | 25  |
| UBE2N_RAT | Q9EQX9 | Ubiquitin-conjugating enzyme E2 N                                        | Ube2n    | 17.12  | 7043.94  | 8   |
| VAMP3_RAT | P63025 | VAMP3                                                                    | Vamp3    | 11.48  | 440.77   | 3   |
| VAT1_RAT  | Q3MIE4 | Synaptic vesicle membrane protein VAT-1 homolog                          | Vat1     | 43.12  | 4179.74  | 8   |
| VATB2_RAT | P62815 | V-type proton ATPase subunit B                                           | Atp6v1b2 | 56.55  | 795.64   | 15  |
| VDAC1_RAT | Q9Z2L0 | Voltage-dependent anion-selective channel protein 1                      | Vdac1    | 30.76  | 2829.24  | 11  |
| VDAC2_RAT | P81155 | Voltage-dependent anion-selective channel protein 2                      | Vdac2    | 31.75  | 695.17   | 10  |
| VIME_RAT  | P31000 | Vimentin                                                                 | Vim      | 53.73  | 1477.31  | 12  |
| VWA5A_RAT | Q75WE7 | Von Willebrand factor A domain-containing protein 5A                     | Vwa5a    | 91.48  | 5986.09  | 18  |
| YBOX3_RAT | Q62764 | Y-box-binding protein 3                                                  | Ybx3     | 38.85  | 421.43   | 4   |
| YME1_RAT  | Q925S8 | ATP-dependent zinc metalloprotease YME1L1                                | Yme1l1   | 79.87  | 329.19   | 9   |

| Header line description of worksheets |                                                                          |
|---------------------------------------|--------------------------------------------------------------------------|
| Method                                | Protein identification with which Method                                 |
| Protein ID                            | Protein identification of UniProt                                        |
| Protein accession                     | Protein accession number of UniProt                                      |
| Protein description                   | Protein functional description                                           |
| Gene name                             | Indicates the name of the gene that code for the protein sequence        |
| MW [kDa]                              | Protein molecular weight ,unit [kDa]                                     |
| Score AVG                             | A simple rule to be used to judge whether a result is significant or not |
| Peptides AVG                          | Number of peptides whitch spectrum hit                                   |
